# Supplementary material for: Halosulfonamidation of camphene: chemo and stereoselectivity, rearrangement, solvent interception, heterocyclization
Source: Royal Society of Chemistry journal article supplement (doi:10.1039/d4nj02582b), 2024-01-01

## Supplementary information

### Halosulfonamidation of Camphene: Chemo and Stereoselectivity, Rearrangement, Solvent Interception, Heterocyclization

Mikhail Yu. Moskalik,<sup>a\*</sup> Ivan A. Garagan<sup>a</sup>, Bagrat A. Shainyan<sup>a</sup>, Olga I. Yarovaya<sup>b</sup>,

Anton S. Ganin<sup>a</sup>, Vera V. Astakhova<sup>a</sup>, Irina V. Sterkhova<sup>a</sup>,

Sergey V. Zinchenko<sup>a</sup>, Nariman F. Salakhutdinov<sup>b</sup>, Amirbek D. Radzhabov<sup>c</sup>

*a) A.E. Favorsky Irkutsk Institute of Chemistry, Siberian Division of Russian Academy of Sciences  
664033 Irkutsk, Russia. E-mail: [moskalik@irioch.irk.ru](mailto:moskalik@irioch.irk.ru)*

*b) Department of Medicinal Chemistry, N.N. Vorozhtsov Novosibirsk Institute of Organic Chemistry SB  
RAS, Lavrentiev ave., 9, 630090 Novosibirsk, Russia*

*c) Research School of Chemistry and Applied Biomedical Sciences, Tomsk Polytechnic University,  
Tomsk 634050, Russia*

#### Table of Contents:

|                                                                                                  |     |
|--------------------------------------------------------------------------------------------------|-----|
| Materials and Methods .....                                                                      | 2   |
| Preparation of camphene amidation products <b>3-17</b> .....                                     | 2   |
| Crystal Structure Analysis of <b>3a</b> .....                                                    | 35  |
| Crystal Structure Analysis of <b>5a</b> .....                                                    | 38  |
| Crystal Structure Analysis of <b>7k</b> .....                                                    | 41  |
| Crystal Structure Analysis of <b>8a</b><br>.....                                                 | 43  |
| Crystal Structure Analysis of <b>8k</b> .....                                                    | 44  |
| Copies of <sup>1</sup> H, <sup>13</sup> C, <sup>19</sup> F and NMR spectra of all compounds..... | 48  |
| 2D-NMR spectra of compounds.....                                                                 | 107 |
| HRMS (ESI) data of compounds<br>.....                                                            | 110 |

## Materials and Methods

**Experimental.** All reactions were carried out under argon atmosphere in dry solvents unless otherwise noted. Reactions were stirred using Teflon-coated magnetic stir bars. Elevated temperatures were maintained using thermostat-controlled heating blocks. Organic solutions were concentrated using a rotary evaporator with a diaphragm vacuum pump. Analytical TLC analysis was carried out on aluminum plates coated with silica gel 60 F<sub>254</sub>, 0.2 mm thickness, visualized by 254 nm UV lamp or aqueous NaIO<sub>4</sub> solutions. Purification of products was accomplished by flash column chromatography on silica gel 60 Å 230 mesh. Reagents and solvents were purchased from commercial sources and were used without further purification. Camphene was used as a racemic mixture of enantiomers.

**Analytical.** Melting points were determined on a MeltEMP apparatus and are uncorrected. NMR spectra were recorded on a Bruker DPX 400 nuclear magnetic resonance spectrometer at working frequencies 400 (<sup>1</sup>H), 100 (<sup>13</sup>C), 376 (<sup>19</sup>F) Hz. The NMR spectra were calibrated using residual undeuterated solvent as internal references (CHCl<sub>3</sub> peak [7.27 (<sup>1</sup>H) and 77.1 (<sup>13</sup>C) ppm] and CD<sub>3</sub>CN peak [1.95 (<sup>1</sup>H), 1.3 and 118.0 (<sup>13</sup>C) ppm]). Data for <sup>1</sup>H NMR are recorded as follows: chemical shift ( $\delta$ , ppm), multiplicity (s = singlet, d = doublet, t = triplet, m = multiplet or unresolved, br = broad, dd = doublet of doublets, dt = doublet of triplets, ddd = doublet of doublet of doublets, coupling constants in Hz, integration). IR spectra were taken on a Bruker Vertex 70 spectrophotometer in KBr or film. High-resolution mass spectra (HRMS) were measured on an Agilent 1200 HPLC chromatograph with Agilent 6210 mass spectrometer (HR-TOF-MS, ESI<sup>+</sup> ionization in acetonitrile with 0.1% HFBA). Elemental compositions were determined by accurate mass measurement with standard deviation. Crystal data were collected on a Bruker D8 Venture diffractometer with MoK $\alpha$  radiation ( $\lambda = 0.71073$ ) using the  $\varphi$  and  $\omega$  scans.

**Preparation of camphene amidation products 3-17**  
**Procedures for the Synthesis of all products**

**1. Addition of triflamide 1a to camphene 2 in the presence of NIS in MeCN.**

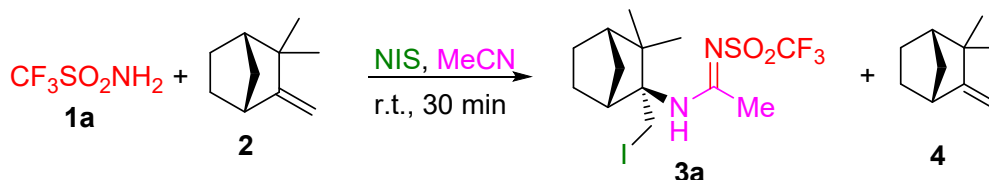

To 1 g (6.7 mmol) of triflamide **1a** dissolved in 50 ml of acetonitrile was added 0.92 g (6.7 mmol) of camphene **2**, then 1.66 g (1.1 equiv., 7.0 mmol) of NIS. The mixture was stirred for 30 min. Next, acetonitrile was removed in a vacuum, the resulting residue was washed with 50 ml of diethyl ether, and after cooling, the succinimide was filtered off, and the solvent was distilled in a vacuum. The residue was purified on a silica gel column (80 g, eluents: hexane - ether 3:1, hexane - ether 1:4) to afford 0.19 g (11%) of product **4** and 2.18 g (72%) of product **3a**.

*N*-(1-(Iodomethyl)-7,7-dimethylbicyclo[2.2.1]heptan-2-yl)-*N'*-((trifluoromethyl)sulfonyl)acetamide (**3a**).

White solid. M.p. 160°C.

<sup>1</sup>H NMR (400 MHz, CDCl<sub>3</sub>): δ 5.84 (s, 1H), 4.85 – 4.66 (d, *J* = 9.7 Hz, 1H), 3.41 (d, *J* = 9.7 Hz, 1H), 2.54 (s, 3H), 2.37 – 2.29 (m, 1H), 2.10 – 2.05 (m, 1H), 1.94 – 1.88 (m, 1H), 1.68 – 1.54 (m, 1H), 1.50-1.42 (m, 1H), 1.49 – 1.42 (m, 1H), 1.32 – 1.24 (m, 2H), 1.22 (s, 3H), 1.10 (s, 3H).

<sup>13</sup>C NMR (100 MHz, CDCl<sub>3</sub>): δ 167.9, 119.4 (q, CF<sub>3</sub>, *J* = 319.8 Hz), 69.7, 51.8, 51.1, 46.7, 33.6, 27.2, 23.0, 22.8, 21.9, 21.3, 11.2.

<sup>19</sup>F NMR (376 MHz, CD<sub>3</sub>CN): δ -79.04. IR: 3308, 2964, 1630, 1547, 1316, 1208, 1202, 1126, 1054, 775, 652, 601 cm<sup>-1</sup>.

HRMS (ESI): *m/z* calcd for C<sub>13</sub>H<sub>21</sub>IF<sub>3</sub>N<sub>2</sub>O<sub>2</sub>S<sup>+</sup>: 453,03205 (M+H)<sup>+</sup>; found: 453,03218.

Anal. calcd (%) for C<sub>13</sub>H<sub>20</sub>F<sub>3</sub>IN<sub>2</sub>O<sub>2</sub>S: C, 34.52; H, 4.46; N, 6.19; I, 28.06; found: C, 34.50; H, 4.48; N, 6.16; I, 28.21.

3-(Iodomethylene)-2,2-dimethylbicyclo[2.2.1]heptane<sup>1</sup> (**4**). Colorless liquid.

$^1\text{H}$  NMR (400 MHz,  $\text{CDCl}_3$ ):  $\delta$  5.52 (s, 1H), 3.02 (m, 1H), 2.20 (m, 1H), 1.81 - 1.77 (m, 1H), 1.75 - 1.61 (m, 2H), 1.53 - 1.40 (m, 1H), 1.33 - 1.24 (m, 2H), 1.08 (s, 3H), 1.05 (s, 3H).

$^{13}\text{C}$  NMR (100 MHz,  $\text{CDCl}_3$ ):  $\delta$  167.4, 64.6, 49.7, 49.3, 45.4, 36.6, 28.9, 27.0, 25.8, 23.5.

IR: 3051, 2969, 2868, 1627, 1462, 1304, 1234, 1130, 1105, 948, 765, 645  $\text{cm}^{-1}$ .

HRMS (ESI):  $m/z$  calcd for  $\text{C}_{10}\text{H}_{16}\text{I}^+$ : 263.02967 ( $\text{M}+\text{H}$ ) $^+$ ; found: 263.02957.

## 2. Addition of 4-methoxyphenylsulfonamide **1b** to camphene **2** in the presence of NIS in MeCN.

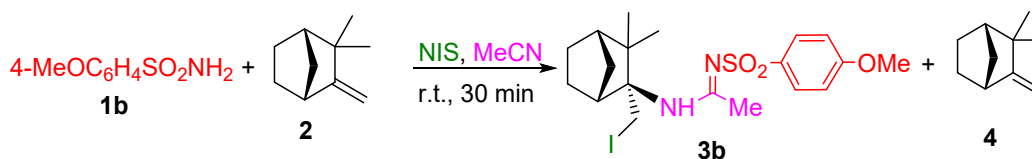

*N'*-((4-Methoxyphenyl)sulfonyl)-*N*-(2-(iodomethyl)-3,3-dimethylbicyclo[2.2.1]heptan-2-yl)acetamide (**3b**). The reaction was carried out as mentioned above: 1 g (5.3 mmol) of 4-methoxyphenylsulfonamide **1b**, 0.74 g (5.3 mmol) of **2**, 1.30 g (5.8 mmol) of NIS, 40 ml of MeCN. The mixture was stirred for 30 min. Next, acetonitrile was removed in a vacuum, the resulting residue was washed with 50 ml of diethyl ether, and after cooling, the succinimide was filtered off, and the solvent was distilled in a vacuum. The reaction mixture was purified on a silica gel column (80 g; eluents: hexane - ether 3:1, hexane - ether 1:4) to afford 0.13 g (9%) of product **4** and product **3b** as white solid (2.24 g, 84%).

White solid. M.p. 199°C.

$^1\text{H}$  NMR (400 MHz,  $\text{CDCl}_3$ ):  $\delta$  7.85 (d,  $J = 8.8$  Hz, 2H), 6.94 (d,  $J = 8.8$  Hz, 2H), 5.26 (s, 1H), 4.77 (d,  $J = 10.0$  Hz, 1H), 3.86 (s, 3H), 3.29 (d,  $J = 10.0$  Hz, 1H), 2.42 (s, 3H), 2.25 - 2.17 (m, 1H), 2.00 - 1.95 (m, 1H), 1.93 - 1.86 (m, 1H), 1.59 - 1.47 (m, 2H), 1.45 - 1.33 (m, 2H), 1.28 - 1.20 (m, 1H), 1.18 (s, 3H), 0.95 (s, 3H).

$^{13}\text{C}$  NMR (100 MHz,  $\text{CDCl}_3$ ):  $\delta$  164.7, 162.1, 135.4, 128.4, 113.8, 68.1, 55.5, 51.8, 50.9, 46.4, 33.6, 27.5, 22.8, 21.9, 21.66, 21.62, 13.5.

Anal. calcd (%) for  $\text{C}_{19}\text{H}_{27}\text{IN}_2\text{O}_3\text{S}$ : C, 46.54; H, 5.55; I, 25.88; N, 5.71; S, 6.54; found: C, 46.68; H, 5.62; I, 25.39; N, 5.75; S, 6.50.

## 3. Addition of tosylamide **1c** to camphene **2** in the presence of NIS in MeCN.



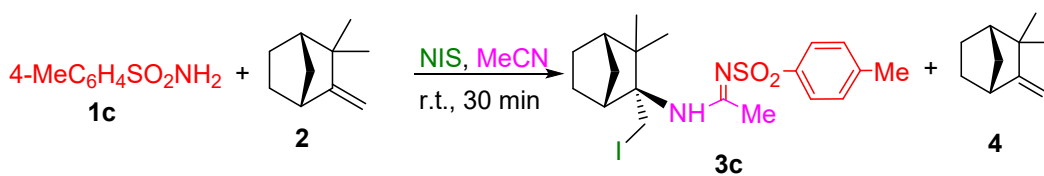

*N*-(2-(Iodomethyl)-3,3-dimethylbicyclo[2.2.1]heptan-2-yl)-*N'*-tosylacetamide (**3c**).

The reaction was carried out as mentioned above: 1 g (5.8 mmol) of tosylamide **1c**, 0.79 g (5.8 mmol) of **2**, 1.45 g (6.4 mmol) of NIS, 40 ml of MeCN. The mixture was stirred for 30 min. Next, acetonitrile was removed in a vacuum, the resulting residue was washed with 50 ml of diethyl ether, and after cooling, the succinimide was filtered off, and the solvent was distilled in a vacuum. The reaction mixture was purified on a silica gel column (80 g; eluents: hexane - ether 3:1, hexane - ether 1:4, ether) to afford 0.17 g (11%) of product **4** and of product **3c** as white solid (1.98 g, 72%).

White solid. M.p. 197°C.

<sup>1</sup>H NMR (400 MHz, CDCl<sub>3</sub>): δ 7.83 (d, *J* = 7.9 Hz, 2H), 7.27 (d, *J* = 7.8 Hz, 2H), 5.08 (s, 1H), 4.75 (d, *J* = 10.3 Hz, 1H), 3.30 (d, *J* = 10.3 Hz, 1H), 2.44 (s, 3H), 2.41 (s, 3H), 2.24 – 2.12 (m, 2H), 2.03 – 1.99 (m, 1H), 1.94 – 1.84 (m, 1H), 1.57 – 1.48 (m, 2H), 1.45 – 1.35 (m, 2H), 1.19 (s, 3H), 0.95 (s, 3H).

<sup>13</sup>C NMR (100 MHz, CDCl<sub>3</sub>): δ 164.8, 142.2, 140.4, 129.2, 126.4, 68.1, 51.8, 50.8, 46.5, 33.6, 27.5, 22.8, 21.9, 21.8, 21.6, 21.5, 13.4.

Anal. calcd (%) for C<sub>19</sub>H<sub>27</sub>IN<sub>2</sub>O<sub>2</sub>S: C, 48.10; H, 5.74; N, 5.91; S, 6.76; I, 26.75; found: C, 48.02; H, 5.62; N, 5.99; S, 6.88; I, 26.39.

#### 4. Addition of phenylsulfonamide **1d** to camphene in the presence of NIS in MeCN.

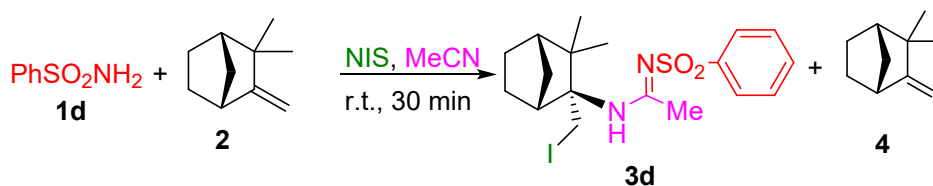

*N*-(2-(Iodomethyl)-3,3-dimethylbicyclo[2.2.1]heptan-2-yl)-*N'*-phenylsulfonamide (**3d**). The reaction was carried out as mentioned above: 1 g (6.4 mmol) of phenylsulfonamide **1d**, 0.87 g (6.4 mmol) of **2**, 1.58 g (7.0 mmol) of NIS, 40 ml of MeCN. The mixture was stirred for 30 min. Next, acetonitrile was removed in a vacuum, the resulting residue was washed with 50 ml of diethyl ether, and after cooling, the succinimide was filtered off, and the solvent was distilled in a vacuum. The reaction mixture was purified on a silica gel column (80 g; eluents: hexane - ether 3:1, hexane -

ether 1:4) to afford 0.13 g (8%) of product **4** and product **3d** as white solid (2.58 g, 88%).

White solid. M.p. 172°C.

$^1\text{H}$  NMR (400 MHz,  $\text{CDCl}_3$ ):  $\delta$  7.94 (d,  $J = 8.7$  Hz, 2H), 7.50 (tr,  $J = 8.7$  Hz, 1H), 7.48 (d,  $J = 8.7$  Hz, 2H), 5.21 (s, 1H), 4.74 (d,  $J = 10.4$  Hz, 1H), 3.30 (d,  $J = 10.5$  Hz, 1H), 2.46 (s, 3H), 2.27 – 2.16 (m, 1H), 2.04 – 1.97 (s, 1H), 1.92 – 1.85 (m, 1H), 1.64 – 1.59 (m, 1H), 1.58 – 1.49 (m, 2H), 1.43 – 1.30 (m, 2H), 1.19 (s, 3H), 0.93 (s, 3H).

$^{13}\text{C}$  NMR (100 MHz,  $\text{CDCl}_3$ ):  $\delta$  164.9, 143.2, 131.7, 128.69, 125.92, 68.2, 51.8, 51.0, 46.5, 33.6, 27.5, 22.8, 21.9, 21.8, 21.5, 13.2.

IR: 3312, 2958, 1544, 1445, 1274, 1141, 1086, 771, 689, 587  $\text{cm}^{-1}$ .

HRMS (ESI):  $m/z$  calcd for  $\text{C}_{18}\text{H}_{26}\text{IN}_2\text{O}_2\text{S}^+$ : 461,0760 (M+H) $^+$ ; found: 461.07603.

## 5. Addition of 4-chlorophenylsulfonamide **1e** to camphene **2** in the presence of NIS in MeCN.

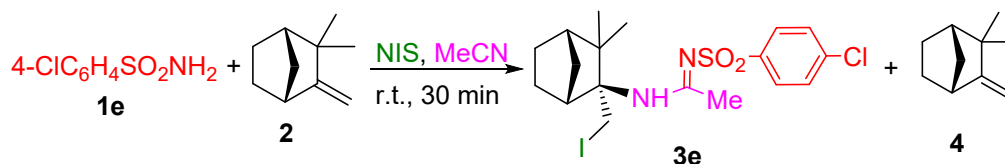

*N'*-((4-Chlorophenyl)sulfonyl)-*N*-(2-(iodomethyl)bicyclo[2.2.1]heptan-2-yl)acetamide (**3e**). The reaction was carried out as mentioned above: 1 g (5.2 mmol) of 4-chlorophenylsulfonamide **1e**, 0.71 g (5.2 mmol) of **2**, 1.30 g (5.7 mmol) of NIS, 40 ml of MeCN. The mixture was stirred for 30 min. Next, acetonitrile was removed in a vacuum, the resulting residue was washed with 50 ml of diethyl ether, and after cooling, the succinimide was filtered off, and the solvent was distilled in a vacuum. The reaction mixture was purified on a silica gel column (80 g; eluents: hexane - ether 3:1, hexane - ether 1:4) to afford 0.16 g (12 %) of product **4** and product **3e** as white solid (1.80 g, 70%).

White solid. M.p. 211°C.

$^1\text{H}$  NMR (400 MHz,  $\text{CDCl}_3$ ):  $\delta$  7.88 (d,  $J = 8.6$  Hz, 2H), 7.46 (d,  $J = 8.6$  Hz, 2H), 5.11 (br. s, 1H), 4.66 (d,  $J = 10.6$  Hz, 1H), 3.30 (d,  $J = 10.6$  Hz, 1H), 2.46 (s, 3H), 2.25 – 2.16 (m, 1H), 2.05 – 1.97 (m, 1H), 1.93 – 1.86 (m, 1H), 1.57 – 1.47 (m, 2H), 1.46 – 1.32 (m, 2H), 1.25 – 1.21 (m, 1H), 1.19 (s, H-9, 3H), 0.94 (s, H-10, 3H).

$^{13}\text{C}$  NMR (100 MHz,  $\text{CDCl}_3$ ):  $\delta$  165.0, 141.7, 138.0, 128.9, 127.9, 68.3, 51.7, 51.0, 46.5, 33.6, 27.5, 22.8, 22.1, 21.8, 21.6, 13.2.

Anal. calcd (%) for  $C_{18}H_{24}ClIN_2O_2S$ : C, 43.69; H, 4.89; N, 5.66; S, 6.48; found: C, 43.80; H, 4.95; N, 5.72; S, 6.43.

## 6. Addition of 4-bromophenylsulfonamide **1f** to camphene **2** in the presence of NIS in MeCN.

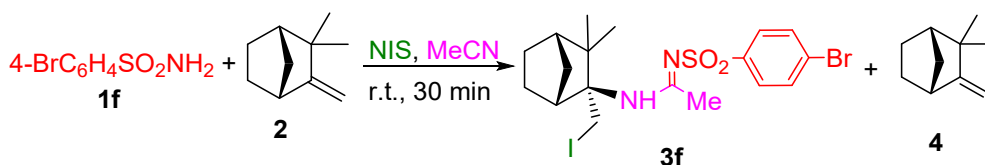

*N'*-((4-Bromophenyl)sulfonyl)-*N*-(2-(iodomethyl)-3,3-dimethylbicyclo[2.2.1]heptan-2-yl)acetamide (**3f**). The reaction was carried out as mentioned above: 1 g (4.2 mmol) of 4-bromophenylsulfonamide **1f**, 0.58 g (4.2 mmol) of **2**, 1.05 g (4.6 mmol) of NIS, 40 ml of MeCN. The mixture was stirred for 30 min. Next, acetonitrile was removed in a vacuum, the resulting residue was washed with 50 ml of diethyl ether, and after cooling, the succinimide was filtered off, and the solvent was distilled in a vacuum. The reaction mixture was purified on a silica gel column (80 g; eluents: hexane - ether 3:1, hexane - ether 1:4) to afford 0.16 g (14 %) of product **4** and 1.69 g (74%) of product **3f** as white solid.

White solid. M.p. 218°C.

$^1H$  NMR (400 MHz,  $CDCl_3$ ):  $\delta$  7.80 (d,  $J = 8.5$  Hz, 2H), 7.62 (d,  $J = 8.5$  Hz, 2H), 5.13 (s, 1H), 4.66 (d,  $J = 10.4$  Hz, 1H), 3.30 (d,  $J = 10.5$  Hz, 1H), 2.46 (s, 3H), 2.25 – 2.17 (m, 1H), 2.03 – 1.99 (m, 1H), 1.68 – 1.07 (m, 4H), 1.26 – 1.19 (m, 1H), 1.18 (s, 3H), 1.05 – 0.84 (m, 1H), 0.94 (s, 3H).

$^{13}C$  NMR (100 MHz,  $CDCl_3$ ):  $\delta$  165.0, 142.3, 131.9, 128.1, 126.5, 68.3, 51.7, 51.0, 46.5, 33.6, 27.5, 22.8, 22.1, 21.8, 21.6, 13.0.

Anal. calcd (%) for  $C_{18}H_{24}BrIN_2O_2S$ : C, 40.09; H, 4.49; N, 5.19; S, 5.95; found: C, 39.99; H, 4.42; N, 5.26; S, 6.01.

## 7. Addition of 4-nitrobenzenesulfonamide **1g** to camphene **2** in the presence of NIS in MeCN.

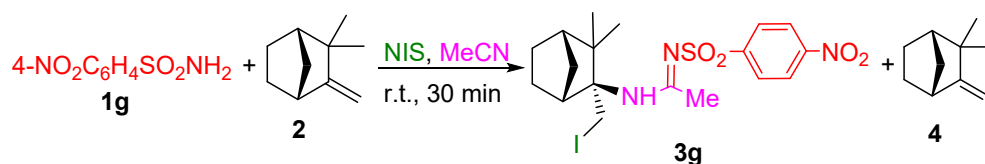

*N*-(2-(Iodomethyl)-3,3-dimethylbicyclo[2.2.1]heptan-2-yl)-*N'*-((4-nitrophenyl)sulfonyl)acetamidine (**3g**). The reaction was carried out as mentioned above: 1 g (5.0 mmol) of 4-nitrobenzenesulfonamide **1g**, 0.67 g (5.0 mmol) of **2**, 1.23 g (5.5 mmol) of NIS, 40 ml of MeCN. The mixture was stirred for 30 min. Next, acetonitrile was removed in a vacuum, the resulting residue was washed with 50 ml of diethyl ether, and after cooling, the succinimide was filtered off, and the solvent was distilled in a vacuum. The reaction mixture was purified on a silica gel column (80 g; eluents: hexane - ether 3:1, hexane - ether 1:4) to afford 0.18 g (14 %) of product **4** and 1.60 g (64%) of product **3g** as white solid.

White solid. M.p. 190°C.

<sup>1</sup>H NMR (δ, ppm, CDCl<sub>3</sub>) δ= 8.35 (d, *J* = 8.6 Hz, 2H), 8.12 (d, *J* = 8.6 Hz, 2H), 5.21 (br. s, 1H), 4.55 (d, *J* = 10.9 Hz, 1H), 3.29 (d, *J* = 10.9 Hz, 1H), 2.51 (s, 3H), 2.27 – 2.17 (m, 1H), 2.04 - 2.00 (m, 1H), 1.95 – 1.86 (m, 1H), 1.60 – 1.51 (m, 2H), 1.45 – 1.38 (m, 1H), 1.19 (s, 3H), 1.15 – 0.94 (m, 2H), 0.92 (s, 3H).

<sup>13</sup>C NMR (100 MHz, CDCl<sub>3</sub>): δ 165.3, 149.5, 145.5, 127.7, 124.1, 68.6, 51.7, 50.7, 46.5, 29.7, 27.5, 22.8, 22.4, 21.9, 21.7, 12.5.

Anal. calcd (%) for C<sub>18</sub>H<sub>24</sub>IN<sub>3</sub>O<sub>4</sub>S: C, 42.78; H, 4.79; N, 8.31; S, 6.34; I, 25.11; found: C, 42.54; H, 4.85; N, 8.37; S, 6.22; I, 24.90.

## 8. Addition of 2-(trifluoromethyl)benzenesulfonamide **1h** to camphene **2** in the presence of NIS in MeCN.

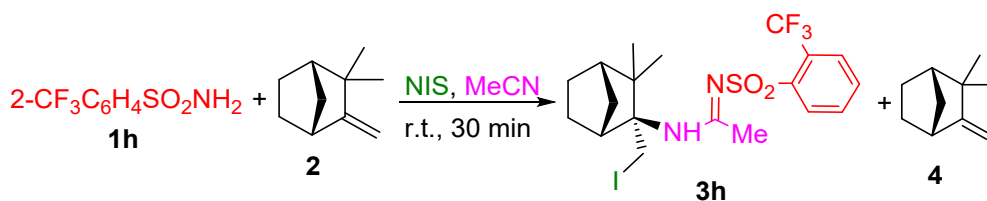

*N*-(2-(Iodomethyl)-3,3-dimethylbicyclo[2.2.1]heptan-2-yl)-*N'*-2-(trifluoromethyl)phenylsulfonyl)acetimidamide (**3h**). The reaction was carried out as above: 1 g (4.4 mmol) of 2-(trifluoromethyl)benzenesulfonamide **1h**, 0.60 g (4.4 mmol) of **2**, 1.00 g (4.4 mmol) of NIS, 40 ml of MeCN. The mixture was stirred for 30 min. Next, acetonitrile was removed in a vacuum, the resulting residue was washed with 50 ml of diethyl ether, and after cooling, the succinimide was filtered off, and the solvent was distilled in a vacuum. The reaction mixture was purified on a silica gel column (80 g; eluents: hexane – ether 3:1, hexane – ether 1:4, hexane – ether 1:6) to afford 1.43 g (61%) of product **3h** and 0.1 g (8%) of product **4**.

White solid. M.p. 159°C.

$^1\text{H}$  NMR (400 MHz,  $\text{CDCl}_3$ )  $\delta$  8.29 (d,  $J = 7.8$  Hz, 1H), 7.82 (d,  $J = 7.7$ , 1H), 7.65 (m, 2H), 5.44 (s, 1H), 4.57 (d,  $J = 10.5$  Hz, 1H), 3.20 (d,  $J = 10.5$  Hz, 1H), 2.51 (s, 3H), 2.21 (s, 1H), 1.95 (m,  $J = 2.7$  Hz, 1H), 1.88 (d,  $J = 10.6$  Hz, 1H), 1.48 (m, 2H), 1.34 (m, 2H), 1.17 (m, 1H), 1.12 (s, 3H), 0.78 (s, 3H).

$^{13}\text{C}$  NMR (100 MHz,  $\text{CDCl}_3$ )  $\delta$  164.81, 141.95, 132.16, 131.84, 130.61, 127.76 (q,  $J = 6.2$  Hz), 123.00 (q,  $J = 274.4$  Hz), 68.28, 51.85, 50.99, 46.37, 33.62, 27.27, 22.83, 22.17, 21.87, 21.18, 12.85.

$^{19}\text{F}$  NMR (376 MHz,  $\text{CDCl}_3$ ): -56.69.

IR: 3997, 3373, 3267, 3113, 2962, 2612, 2381, 2310, 1651, 1551, 1440, 1309, 1141, 1038, 921, 776, 727, 655, 595  $\text{cm}^{-1}$ .

Anal. calcd (%) for  $\text{C}_{19}\text{H}_{24}\text{F}_3\text{IN}_2\text{O}_2\text{S}$ : C, 43.19; H, 4.58; F, 10.79; I, 24.02; N, 5.30; S, 6.07; found: C, 42.95; H, 4.63; F, 10.70; I, 23.43; N, 5.21; S, 6.37.

## 9. Addition of 4-(trifluoromethyl)benzenesulfonamide **1i** to camphene **2** in the presence of NIS in MeCN.

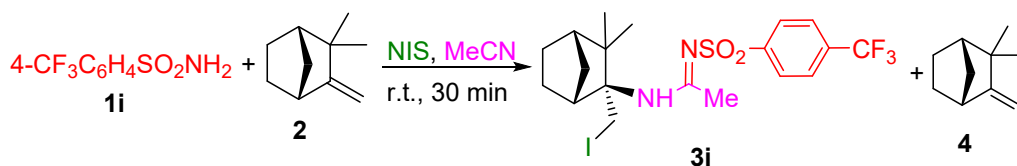

*N*-(2-(iodomethyl)-3,3-dimethylbicyclo[2.2.1]heptan-2-yl)-*N'*-(4-(trifluoromethyl)phenyl)sulfonylacetimidamide (**3i**). The reaction was carried out as above: 1 g (4.4 mmol) of 4-(trifluoromethyl)benzenesulfonamide **1i**, 0.60 g (4.4 mmol) of **2**, 1.00 g (4.4 mmol) of NIS, 40 ml of MeCN. The mixture was stirred for 30 min. Next, acetonitrile was removed in a vacuum, the resulting residue was washed with 50 ml of diethyl ether, and after cooling, the succinimide was filtered off, and the solvent was distilled in a vacuum. The reaction mixture was purified on a silica gel column (80 g; eluents: hexane – ether 3:1, hexane – ether 1:4) to afford 0.14 g (12%) of product **4** and 1.59 g (68%) of product **3i** as white solid.

White solid. M.p. 159°C.

$^1\text{H}$  NMR (400 MHz,  $\text{CDCl}_3$ )  $\delta$  8.09 – 8.02 (m, 2H), 7.78 – 7.72 (m, 2H), 5.32 (s, 1H), 4.63 (d,  $J = 10.6$  Hz, 1H), 3.29 (d,  $J = 10.5$  Hz, 1H), 2.48 (s, 3H), 2.22 (s, 1H), 2.00 (s, 1H), 1.53 (s, 1H), 1.39 (d,  $J = 9.1$  Hz, 1H), 1.27 (s, 1H), 1.18 (s, 2H), 0.92 (s, 3H).

$^{13}\text{C}$  NMR (100 MHz,  $\text{CDCl}_3$ )  $\delta$  165.38, 146.65, 133.58 (q,  $J = 32.9$  Hz), 126.98, 125.94, 125.90, 123.44 (q,  $J = 273.4$  Hz), 68.51, 51.76, 50.94, 46.55, 33.66, 27.51, 22.82, 22.16, 21.89, 21.64, 12.82.

$^{19}\text{F}$  NMR (376 MHz,  $\text{CDCl}_3$ ): -62.69.

IR: 3567, 3322, 3119, 2946, 1547, 1404, 1323, 1144, 894, 843, 724, 658, 606, 542, 427  $\text{cm}^{-1}$ .

Anal. calcd (%) for  $\text{C}_{19}\text{H}_{24}\text{F}_3\text{IN}_2\text{O}_2\text{S}$ : C, 43.19; H, 4.58; F, 10.79; I, 24.02; N, 5.30; S, 6.07; found: C, 43.40; H, 4.59; F, 10.51; I, 23.78; N, 5.15; S, 6.30.

#### 10. Addition of sulfamide **1j** to camphene **2** in the presence of NIS in MeCN.

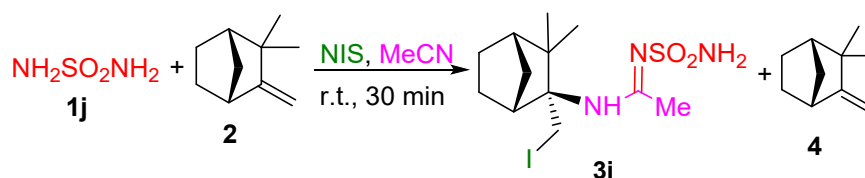

*N*-(2-(Iodomethyl)-3,3-dimethylbicyclo[2.2.1]heptan-2-yl)-*N'*-sulfamoylacetimidamide (**3j**). The reaction was carried out as above: 1 g (10.4 mmol) of sulfamide **1j**, 0.60 g (4.4 mmol) of **2**, 1.00 g (4.4 mmol) of NIS, 40 ml of MeCN. The mixture was stirred for 30 min. Next, acetonitrile was removed in a vacuum, the resulting residue was washed with 50 ml of diethyl ether, and after cooling, the succinimide was filtered off, and the solvent was distilled in a vacuum. The reaction mixture was purified on a silica gel column (80 g; eluents: hexane – ether 3:1, hexane – ether 1:10) to afford 0.51 g (18%) of product **4** and 2.54 g (63%) of product **3k** as white solid.

White solid. M.p. 124°C.

$^1\text{H}$  NMR (400 MHz,  $\text{CD}_3\text{CN}$ )  $\delta$  6.10 (s, 1H), 5.13 (d,  $J = 10.6$  Hz, 1H), 5.10 (s, 2H), 3.51 (d,  $J = 10.4$  Hz, 1H), 2.30 (s, 3H), 2.26 (m, 1H), 1.97 (m,  $J = 16.2$  Hz, 2H), 1.66 – 1.55 (m, 2H), 1.46 – 1.38 (m, 2H), 1.23 (s, 3H), 1.12 (s, 3H).

$^{13}\text{C}$  NMR (100 MHz,  $\text{CD}_3\text{CN}$ )  $\delta$  166.00, 68.56, 52.77, 51.20, 47.27, 34.33, 27.89, 23.39, 22.66, 21.93, 20.11, 15.61.

IR: 3329, 3119, 2946, 1708, 1546, 1409, 1365, 1299, 1213, 1138, 1035, 980, 896, 759, 643  $\text{cm}^{-1}$ .

Anal. calcd (%) for  $\text{C}_{12}\text{H}_{22}\text{IN}_3\text{O}_2\text{S}$ : C, 36.10; H, 5.55; I, 31.78; N, 10.52; S, 8.03; found: C, 35.94; H, 5.42; I, 32.00; N, 10.64; S, 8.12.

#### 11. Addition of triflamide **1a** to camphene **2** in the presence of NBS in MeCN.

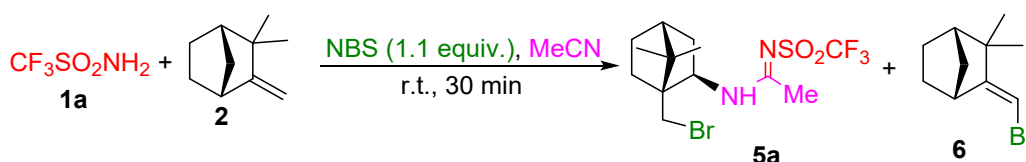

*N*-(1-(Bromomethyl)-7,7-dimethylbicyclo[2.2.1]heptan-2-yl)-*N'*-(trifluoromethyl)sulfonylacetamide (**5a**) and 3-(bromomethylene)-2,2-dimethylbicyclo[2.2.1]heptane (**6**). To 2 g of triflamide **1a** (1 equiv., 13.4 mmol) dissolved in 50 ml of acetonitrile was added 1.83 g (1 equiv., 13.4 mmol) of camphene **2**, then 2.63 g (1.1 equiv., 14.8 mmol) of NBS. The mixture was stirred for 30 min. Next, acetonitrile was removed in a vacuum, the resulting residue was washed with 50 ml of diethyl ether, and after cooling, the succinimide was filtered off, and the solvent was distilled in a vacuum. The residue was purified on a silica gel column (80 g, eluents: hexane - ether 3:1, hexane - ether 1:4) to afford 0.4 g (14%) of product **6** and 4.18 g (77%) of product **5a**.

*N*-(1-(Bromomethyl)-7,7-dimethylbicyclo[2.2.1]heptan-2-yl)-*N'*-(trifluoromethyl)sulfonylacetamide (**5a**).

White solid. M.p. 154°C.

<sup>1</sup>H NMR (400 MHz, CD<sub>3</sub>CN): δ 7.34 (s, 1H), 4.02 (dt, *J* = 8.1, 5.5 Hz, 1H), 3.76 (d, *J* = 10.9 Hz, 1H), 3.54 (d, *J* = 10.9 Hz, 1H), 2.44 (s, 3H), 1.93 – 1.88 (m, 2H), 1.82 – 1.76 (m, 2H), 1.76 – 1.71 (m, 1H), 1.62 – 1.49 (m, 1H), 1.29 – 1.20 (m, 1H), 1.04 (s, 3H), 0.95 (s, 3H).

<sup>13</sup>C NMR (100 MHz, CD<sub>3</sub>CN): δ 169.4, 119.14 (q, CF<sub>3</sub>, *J* = 320 Hz), 59.8, 53.3, 49.9, 47.4, 39.2, 35.5, 35.2, 27.0, 21.8, 20.78, 20.74.

<sup>19</sup>F NMR (376 MHz, CD<sub>3</sub>CN): δ - 80.2.

IR: 3433, 3354, 2959, 2935, 1634, 1574, 1542, 1439, 1328, 1220, 1191, 1146, 1060, 778, 651, 594 cm<sup>-1</sup>.

Anal. calcd (%) for C<sub>13</sub>H<sub>20</sub>BrF<sub>3</sub>N<sub>2</sub>O<sub>2</sub>S: C, 38.53; H, 4.97; N, 6.91; S, 7.91; found: C, 38.45; H, 4.92; N, 6.90; S, 7.83.

3-(Bromomethylene)-2,2-dimethylbicyclo[2.2.1]heptane<sup>1,2</sup> (**6**). Colorless liquid.

<sup>1</sup>H NMR (400 MHz, CDCl<sub>3</sub>): δ 5.62 (s, 1H), 3.15 (d, *J* = 3.5 Hz, 1H), 2.08 – 2.02 (m, 1H), 1.79 – 1.65 (m, 3H), 1.49 – 1.40 (m, 1H), 1.33 – 1.28 (m, 1H), 1.27 – 1.24 (m, 1H), 1.08 (s, 3H), 1.06 (s, 3H).

<sup>13</sup>C NMR (100 MHz, CDCl<sub>3</sub>): δ 160.9, 94.1, 49.1, 45.1, 44.3, 36.8, 28.9, 27.0, 25.8, 23.5.

IR: 3067, 2959, 2883, 1641, 1461, 1307, 1241, 950, 887, 770, 696 cm<sup>-1</sup>.

HRMS (ESI): *m/z* calcd for C<sub>10</sub>H<sub>16</sub>Br<sup>+</sup>: 215,04354 (M+H)<sup>+</sup>; found: 215.04340.

## 12. Addition of tosylamide **1c** to camphene **2** in the presence of NBS in MeCN.

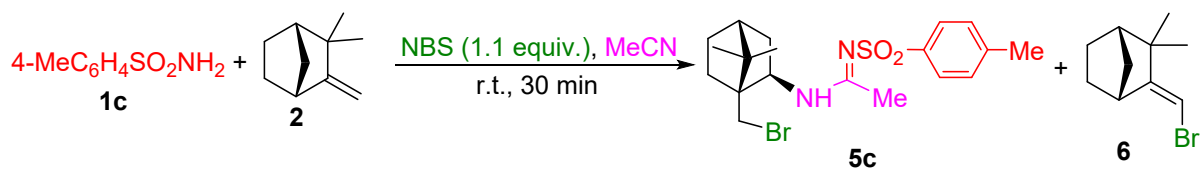

*N*-(1-(Bromomethyl)-7,7-dimethylbicyclo[2.2.1]heptan-2-yl)-*N'*-tosylacetamide (**5c**). The reaction was carried out as mentioned above: 1.5 g (8.8 mmol) of tosylamide **1c**, 1.19 g of **2**, 1.72 g (9.7 mmol) of NBS, 40 ml of MeCN. The mixture was stirred for 30 min. Next, acetonitrile was removed in a vacuum, the resulting residue was washed with 50 ml of diethyl ether, and after cooling, the succinimide was filtered off, and the solvent was distilled in a vacuum. The reaction mixture was purified on a silica gel column (80 g, eluents: hexane - ether 3:1, hexane - ether 1:4) to afford 0.28 g (15%) of product **6** and compound **5c** as white solid (2.74 g, 73%).

White solid. M.p. 156°C.

$^1\text{H NMR}$  (400 MHz,  $\text{CD}_3\text{CN}$ ):  $\delta$  7.74 (d,  $J = 8.3$  Hz, 2H), 7.32 ( $J = 8.3$  Hz, 2H), 6.52 (s, 1H), 4.03 (dt,  $J = 8.1, 5.0$  Hz, 1H), 3.71 (d,  $J = 10.7$  Hz, 1H), 3.49 (d,  $J = 10.7$  Hz, 1H), 2.40 (s, 3H), 2.30 (s, 3H), 1.90 – 1.82 (m, 2H), 1.80 – 1.74 (m, 2H), 1.56 – 1.48 (m, 1H), 1.29 – 1.24 (m, 1H), 1.24 – 1.19 (m, 1H), 1.01 (s, 3H), 0.93 (s, 3H).

$^{13}\text{C NMR}$  (100 MHz,  $\text{CD}_3\text{CN}$ ):  $\delta$  166.6, 143.2, 142.4, 130.1, 127.0, 58.4, 53.3, 49.8, 47.4, 39.5, 35.5, 35.4, 27.0, 21.4, 20.9, 20.84, 20.81.

IR: 3352, 2955, 1538, 1281, 1145, 1088, 809, 764, 665, 604  $\text{cm}^{-1}$ .

Anal. calcd (%) for  $\text{C}_{19}\text{H}_{27}\text{BrN}_2\text{O}_2\text{S}$ : C, 53.39; H, 6.37; N, 6.55; S, 7.50 Br, 18.70; found: C, 53.44; H, 6.40; N, 6.48; S, 7.52 Br, 18.89.

### 13. Addition of 4-chlorophenylsulfonamide **1e** to camphene **2** in the presence of NBS in MeCN.

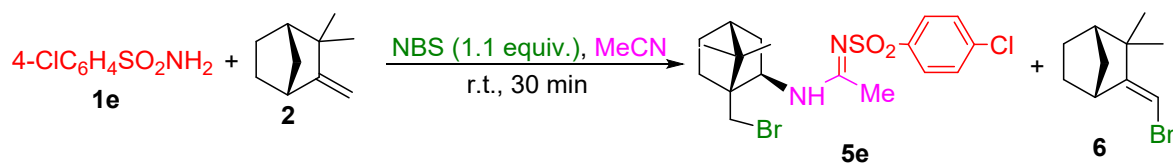

*N*-(1-(Chloromethyl)-7,7-dimethylbicyclo[2.2.1]heptan-2-yl)-*N'*-((4-chlorophenyl)sulfonyl)acetamide (**5e**). The reaction was carried out as mentioned above: 1.5 g (7.8 mmol) of 4-chlorophenylsulfonamide **1e**, 1.06 g (7.8 mmol) of **2**, 1.53 g (8.2 mmol) of NBS, 40 ml of MeCN. The mixture was stirred for 30 min. Next, acetonitrile was removed in a vacuum, the resulting residue was washed with 50 ml of diethyl ether, and after cooling, the succinimide was filtered off, and the solvent was distilled in a vacuum. The reaction mixture was purified on a silica gel column (80 g; eluents: hexane - ether



3:1, hexane - ether 1:4) to afford 0.32 g (19%) of product **6** and product **5e** as white solid (2.45 g, 70%).

White solid. M.p. 162°C.

$^1\text{H}$  NMR (400 MHz,  $\text{CD}_3\text{CN}$ ):  $\delta$  7.84 (d,  $J$  = 8.7 Hz, 2H), 7.83 (d,  $J$  = 8.5 Hz, 2H), 7.54 (d,  $J$  = 8.5 Hz, 2H), 7.51 (d,  $J$  = 8.7 Hz, 2H), 6.59 (s, 1H), 4.03 (dt,  $J$  = 8.2, 5.0 Hz, 1H), 3.70 (d,  $J$  = 10.7 Hz, 1H), 3.50 (d,  $J$  = 10.3 Hz, 1H), 3.49 (d,  $J$  = 10.7 Hz, 1H), 3.39 (d,  $J$  = 10.7 Hz, 1H), 2.32 (s, 3H), 2.10 (s, 3H), 1.89 – 1.82 (m, 3H), 1.81 – 1.67 (m, 5H), 1.06 (s, 3H), 1.01 (s, 3H), 0.94 (s, 3H), 0.93 (s, 3H).

$^{13}\text{C}$  NMR (100 MHz,  $\text{CD}_3\text{CN}$ ):  $\delta$  166.8, 143.9, 138.0, 130.1, 129.8, 128.8, 128.6, 58.5, 53.3, 49.8, 47.4, 39.4, 35.49, 35.47, 27.04, 20.9, 20.8, 20.7, 20.6, 20.4.

IR: 3374, 2954, 1534, 1293, 1274, 1146, 1086, 1011, 778, 635, 602  $\text{cm}^{-1}$ .

Anal. calcd (%) for  $\text{C}_{18}\text{H}_{24}\text{BrClN}_2\text{O}_2\text{S}$ : C, 48.28; H, 5.40; N, 6.26; S, 7.16; found: C, 48.77; H, 5.35; N, 6.12; S, 7.40.

#### 14. Addition of 2-(trifluoromethyl)benzenesulfonamide **1h** to camphene **2** in the presence of NBS in MeCN.

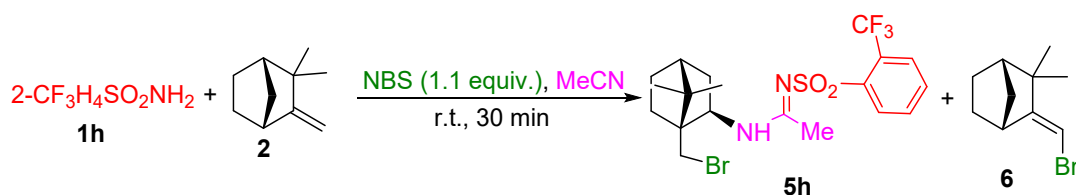

*N*-(1-(Bromomethyl)-7,7-dimethylbicyclo[2.2.1]heptan-2-yl)-*N'*-(2-(trifluoromethyl)phenyl)sulfonylacetimidamide (**5h**). The reaction was carried out as above: (1 g (4.4 mmol) of 2-(trifluoromethyl)benzenesulfonamide **1h**, 0.60 g (4.4 mmol) of **2**, 0.79 g (4.4 mmol) of NBS, 40 ml of MeCN. The mixture was stirred for 30 min. Next, acetonitrile was removed in a vacuum, the resulting residue was washed with 50 ml of diethyl ether, and after cooling, the succinimide was filtered off, and the solvent was distilled in a vacuum. The reaction mixture was purified on a silica gel column (80 g; eluents: hexane – ether 3:1, hexane – ether 1:4) to afford 0.13 g (14%) of product **6** and of product **5h** as white solid (1.60 g, 75%).

White solid. M.p. 149°C.

$^1\text{H}$  NMR (400 MHz,  $\text{CD}_3\text{CN}$ )  $\delta$  8.26 (d,  $J$  = 7.4 Hz, 1H), 7.89 (d,  $J$  = 7.4 Hz, 1H), 7.76 (m, 2H), 6.65 (s, 1H), 4.05 – 3.90 (m, 1H), 3.70 (d,  $J$  = 10.8 Hz, 1H), 3.48 (d,  $J$  = 10.7 Hz, 1H), 2.34 (s, 3H), 1.84 (m, 1H), 1.81-1.65 (m, 3H), 1.44 (m, 1H), 1.01 (s, 3H), 0.92 (s, 3H).

$^{13}\text{C}$  NMR (100 MHz,  $\text{CD}_3\text{CN}$ )  $\delta$  166.51, 143.26, 133.55, 132.99, 130.99, 129.06 (q,  $J = 6.3$  Hz), 127.58 (q,  $J = 32.9$  Hz), 124.31 (q,  $J = 273.7$  Hz), 58.64, 53.24, 49.83, 47.43, 39.46, 35.43, 35.37, 27.05, 21.19, 20.89, 20.78.

$^{19}\text{F}$  NMR (376 MHz,  $\text{CD}_3\text{CN}$ ): -57.18.

IR: 3341, 3109, 2961, 1601, 1543, 1440, 1310, 1149, 1034, 964, 870, 762, 653  $\text{cm}^{-1}$ .

Anal. calcd (%) for  $\text{C}_{19}\text{H}_{24}\text{BrF}_3\text{N}_2\text{O}_2\text{S}$ : C, 47.41; H, 5.03; Br, 16.60; F, 11.84; N, 5.82; S, 6.66; found: C, 47.55; H, 5.01; Br, 16.59; F, 11.38; N, 5.72; S, 6.60.

### 15. Addition of 4-(trifluoromethyl)benzenesulfonamide **1i** to camphene **2** in the presence of NBS in MeCN.

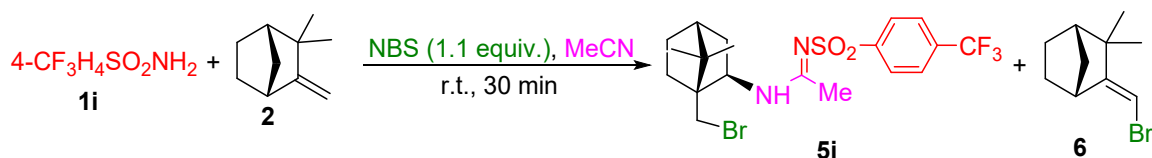

*N*-(1-(Bromomethyl)-7,7-dimethylbicyclo[2.2.1]heptan-2-yl)-*N'*-(4-(trifluoromethylphenyl)sulfonyl)acetimidamide (**5i**). The reaction was carried out as above: 1 g (4.4 mmol) of 4-(trifluoromethyl)benzenesulfonamide **1i**, 0.60 g (4.4 mmol) of **2**, 0.79 g (4.4 mmol) of NBS, 40 ml of MeCN. The mixture was stirred for 30 min. Next, acetonitrile was removed in a vacuum, the resulting residue was washed with 50 ml of diethyl ether, and after cooling, the succinimide was filtered off, and the solvent was distilled in a vacuum. The reaction mixture was purified on a silica gel column (80 g; eluents: hexane – ether 3:1, hexane – ether 1:4) to afford 0.16 g (17%) of product **6** and of product **5i** as white solid (1.65 g, 77%).

White solid. M.p. 151°C.

$^1\text{H}$  NMR (400 MHz,  $\text{CD}_3\text{CN}$ )  $\delta$  8.05 (d,  $J = 8.1$  Hz, 2H), 7.82 (d,  $J = 8.3$  Hz, 2H), 6.68 (s, 1H), 4.04 (q,  $J = 5.0$  Hz, 1H), 3.70 (d,  $J = 10.7$  Hz, 1H), 3.49 (d,  $J = 10.7$  Hz, 1H), 2.35 (s, 3H), 1.87 (m, 2H), 1.76 (m, 3H), 1.51 (m, 1H), 1.21 (m, 1H), 1.01 (s, 3H), 0.93 (s, 3H).

$^{13}\text{C}$  NMR (100 MHz,  $\text{CD}_3\text{CN}$ )  $\delta$  167.01, 127.84, 127.72, 126.86 (q,  $J = 3.9$  Hz), 124.81 (q,  $J = 272$  Hz), 58.67, 53.36, 49.87, 47.47, 39.41, 35.47, 27.03, 21.10, 20.86, 20.78.

$^{19}\text{F}$  NMR (376 MHz,  $\text{CD}_3\text{CN}$ ): -63.19.

IR: 3345, 3104, 2961, 1716, 1596, 1543, 1404, 1324, 1136, 1063, 963, 843, 760, 654, 427  $\text{cm}^{-1}$ .

Anal. calcd (%) for C<sub>19</sub>H<sub>24</sub>BrF<sub>3</sub>N<sub>2</sub>O<sub>2</sub>S: C, 47.41; H, 5.03; Br, 16.60; F, 11.84; N, 5.82; S, 6.66; found: C, 47.12; H, 4.97; Br, 16.50; F, 11.71; N, 5.84; S, 6.67.

#### 16. Addition of triflamide **1a** to camphene **2** in the presence of NBS in MeCN.

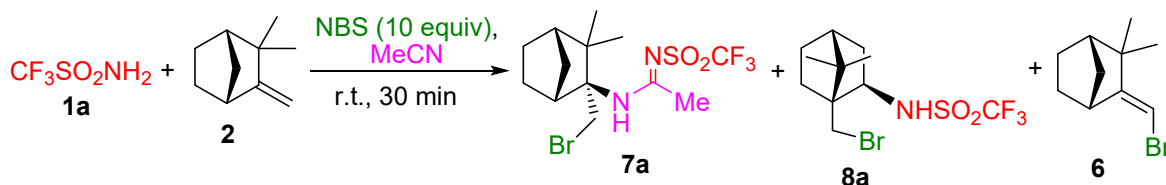

*N*-(2-(Bromomethyl)-3,3-dimethylbicyclo[2.2.1]heptan-2-yl)-*N'*-(trifluoromethylsulfonyl)acetimidamide (**7a**) and *N*-(1-(bromomethyl)-7,7-dimethylbicyclo[2.2.1]heptan-2-yl)-trifluoromethanesulfonamide (**8a**). To 0.45 g of triflamide **1a** (3.0 mmol) dissolved in 180 ml of acetonitrile was added 4.08 g (30.0 mmol) of camphene **2**, then 5.34 g (30.0 mmol) of NBS. The mixture was stirred for 30 min. Next, acetonitrile was removed in a vacuum, the resulting residue was dissolved in 15 ml of chloroform. The formed succinimide was extracted three times from the chloroform in a separating funnel by adding 100 mL of water and shaking vigorously. The chloroform was removed in a vacuum. The residue was purified on a silica gel column (80 g, eluents: hexane - ether 3:1, hexane - ether 1:2, hexane - ether 1:4) to afford bromosubstituted camphene, 0.23 g (21%) of product **8a** and 0.87 g (71%) of product **7a**. The amidines formed, except triflamide, were washed twice with ether (2\*5 mL) to give analytically pure samples. The monoadducts, except triflamide, were also washed twice with ether (2\*5 mL) to obtain analytically pure samples.

*N*-(2-(Bromomethyl)-3,3-dimethylbicyclo[2.2.1]heptan-2-yl)-*N'*-(trifluoromethylsulfonyl)acetimidamide (**7a**). Colorless oil.

<sup>1</sup>H NMR (400 MHz, CDCl<sub>3</sub>) δ 5.87 (s, 1H), 4.83 (d, *J* = 10.4 Hz, 1H), 3.56 (d, *J* = 10.4 Hz, 1H), 2.53 (s, 3H), 2.36 (m, 1H), 1.95 (m, 2H), 1.61 (m, 3H), 1.52 – 1.47 (m, 1H), 1.35 – 1.25 (m, 1H), 1.19 (s, 3H), 1.07 (s, 3H).

<sup>13</sup>C NMR (100 MHz, CDCl<sub>3</sub>) δ 168.02, 119.46 (q, *J* = 319.4 Hz), 70.27, 51.25, 49.42, 47.47, 34.19, 33.94, 26.79, 23.17, 22.93, 22.02, 20.91.

<sup>19</sup>F NMR (376 MHz, CDCl<sub>3</sub>): -79.11.

IR: 3347, 3118, 2960, 1778, 1713, 1557, 1445, 1322, 1190, 1136, 1057, 939, 879, 777, 648, 598, 482 cm<sup>-1</sup>.

Anal. calcd (%) for C<sub>13</sub>H<sub>20</sub>BrF<sub>3</sub>N<sub>2</sub>O<sub>2</sub>S: C, 38.53; H, 4.97; Br, 19.72; F, 14.06; N, 6.91; S, 7.91; found: C, 38.14; H, 5.06; Br, 19.62; F, 13.98; N, 6.99; S, 8.00.

*N*-(1-(Bromomethyl)-7,7-dimethylbicyclo[2.2.1]heptan-2-yl)-trifluoromethanesulfonamide (**8a**). White solid. M.p 120°C.

<sup>1</sup>H NMR (400 MHz, CDCl<sub>3</sub>): δ 5.02 (d, *J* = 9.4 Hz, 1H), 3.78 (dt, *J* = 8.9, 4.8 Hz, 1H), 3.51 (d, *J* = 10.7, 1H), 3.42 (d, *J* = 10.7, 1H), 2.04 – 1.90 (m, 3H), 1.88 – 1.76 (m, 2H), 1.61 – 1.54 (m, 1H), 1.28 – 1.18 (m, 1H), 1.01 (s, 3H), 0.96 (s, 3H), 1.14 – 0.77 (m, 1H).

<sup>13</sup>C NMR (100 MHz, CDCl<sub>3</sub>): δ 60.7, 52.8, 48.8, 46.51, 39.58, 34.34, 32.32, 26.23, 20.74, 20.61.

<sup>19</sup>F NMR (376 MHz, CD<sub>3</sub>CN): δ - 77.0.

IR: 3321, 2963, 1440, 1383, 1231, 1192, 1149, 1069, 953, 686, 609 cm<sup>-1</sup>.

Anal. calcd (%) for C<sub>11</sub>H<sub>17</sub>BrF<sub>3</sub>NO<sub>2</sub>S: C, 36.27; H, 4.70; N, 3.85; S, 8.80; found: C, 36.50; H, 4.65; N, 3.92; S, 8.89.

## 17. Addition of 4-methoxyphenylsulfonamide **1b** to camphene **2** in the presence of NBS in MeCN.

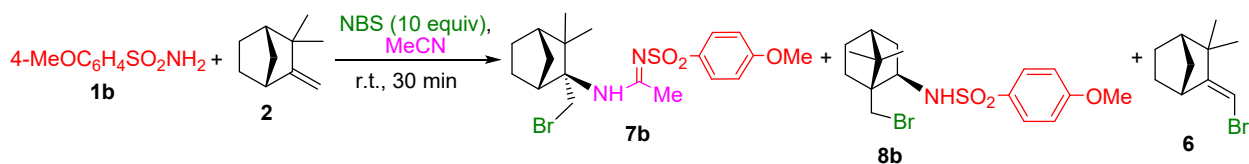

*N*-(1-(Bromomethyl)-7,7-dimethylbicyclo[2.2.1]heptan-2-yl)-*N'*-((4-methoxyphenyl)sulfonyl)acetimidamide (**7b**) and *N*-(1-(bromomethyl)-7,7-dimethylbicyclo[2.2.1]heptan-2-yl)-4-methoxyphenylsulfonamide (**8b**). The reaction was carried out as above: 0.56 g (3.0 mmol) of 4-methoxyphenylsulfonamide **1b**, 4.08 g (30.0 mmol) of **2**, 5.34 g (30.0 mmol) of NBS, 180 ml of MeCN. The mixture was stirred for 30 min. Next, acetonitrile was removed in a vacuum, the resulting residue was dissolved in 15 ml of chloroform. The formed succinimide was extracted three times from the chloroform in a separating funnel by adding 100 mL of water and shaking vigorously. The chloroform was removed in a vacuum. The reaction mixture was further purified after extraction on a silica gel column (80 g, eluents: hexane – ether 1:2, hexane – ether 1:4) to afford of product **8b** as white solid (0,29 g, 24%) and **7b** as white solid (0.80 g, 60%).

*N*-(1-(Bromomethyl)-7,7-dimethylbicyclo[2.2.1]heptan-2-yl)-*N'*-((4-methoxyphenyl)sulfonyl)acetimidamide (**7b**).

White solid. M.p. 180°C.

<sup>1</sup>H NMR (400 MHz, CDCl<sub>3</sub>) δ 7.94 – 7.77 (d, *J* = 8.8 Hz, 2H), 7.12 – 6.85 (d, *J* = 8.9 Hz, 2H), 5.24 (br. s, 1H), 4.88 (d, *J* = 10.6 Hz, 1H), 3.86 (s, 3H), 3.44 (d, *J* = 10.5

Hz, 1H), 2.41 (s, 3H), 2.29 – 2.20 (m, 1H), 1.87 (m, 2H), 1.53 (m, 3H), 1.44 – 1.33 (m, 1H), 1.19 (m, 1H), 1.15 (s, 3H), 0.91 (s, 3H).

$^{13}\text{C}$  (100 MHz,  $\text{CDCl}_3$ )  $\delta$  164.91, 162.16, 135.48, 128.39, 113.80, 68.71, 55.58, 51.29, 49.36, 47.27, 35.51, 33.94, 27.06, 23.29, 22.03, 21.67, 21.12.

IR: 3320, 2919, 1602, 1340, 1201, 1069, 797, 761, 663, 601  $\text{cm}^{-1}$ .

HRMS (ESI):  $m/z$  calcd for  $\text{C}_{19}\text{H}_{28}\text{BrN}_2\text{O}_3\text{S}^+$ : 443,10040 ( $\text{M}+\text{H}^+$ ); found: 443.10078.

*N*-(1-(Bromomethyl)-7,7-dimethylbicyclo[2.2.1]heptan-2-yl)-4-methoxyphenylsulfonamide (**8b**).

White solid. M.p. 153°C.

$^1\text{H}$  NMR (400 MHz,  $\text{CDCl}_3$ ):  $\delta$  7.92 – 7.78 (m, 2H), 6.98 (d,  $J = 9.0$  Hz, 2H), 4.81 (br. d,  $J = 9.2$  Hz, 1H), 3.88 (s, 3H), 3.49 (d,  $J = 10.5$  Hz, 1H), 3.35 (d,  $J = 10.5$  Hz, 1H), 3.26 – 3.14 (m, 1H), 1.92 – 1.79 (m, 2H), 1.76 – 1.64 (m, 2H), 1.64 – 1.54 (m, 1H), 1.45 – 1.32 (m, 1H), 1.14 – 1.05 (m, 1H), 1.01 (s, 3H), 0.88 (s, 3H).

$^{13}\text{C}$  NMR (100 MHz,  $\text{CDCl}_3$ ):  $\delta$  162.9, 131.60, 129.70, 114.21, 59.05, 55.65, 52.78, 48.83, 46.85, 38.83, 34.46, 33.95, 26.38, 20.84, 20.60.

IR: 3258, 2842, 1774, 1702, 1597, 1557, 1500, 1335, 1260, 1156, 1098, 1024, 909, 834, 672, 567  $\text{cm}^{-1}$ .

HRMS (ESI):  $m/z$  calcd for  $\text{C}_{17}\text{H}_{25}\text{BrNO}_3\text{S}^+$ : 402.07385 ( $\text{M}+\text{H}^+$ ); found: 402.07404.

Anal. calcd (%) for  $\text{C}_{17}\text{H}_{24}\text{BrNO}_3\text{S}$ : C, 50.75; H, 6.01; N, 3.48; Br, 19.86; found: C, 50.68; H, 6.14; N, 3.45; Br, 19.94.

## 18. Addition of tosylamide **1c** to camphene **2** in the presence of NBS in MeCN.

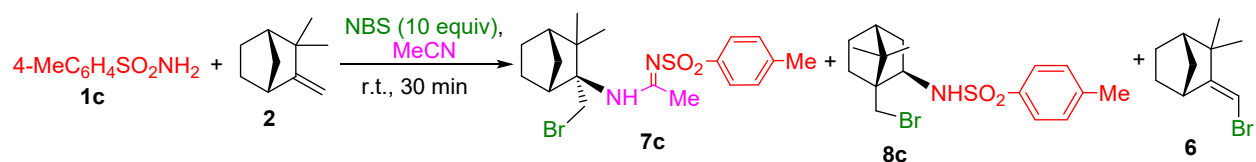

*N*-(2-(Bromomethyl)-3,3-dimethylbicyclo[2.2.1]heptan-2-yl)-*N'*-tosylacetimidamide (**7c**) and *N*-(1-(bromomethyl)-7,7-dimethylbicyclo[2.2.1]heptan-2-yl)-4-methylbenzenesulfonamide (**8c**). The reaction was carried out as above: 0.51 g (3.0 mmol) of tosylamide **1c**, 4.08 g (30.0 mmol) of **2**, 5.34 g (30.0 mmol) of NBS, 180 ml of MeCN. The mixture was stirred for 30 min. Next, acetonitrile was removed in a vacuum, the resulting residue was dissolved in 15 ml of chloroform. The formed succinimide was extracted three times from the chloroform in a separating funnel by adding 100 mL of water and shaking vigorously. The chloroform was removed in a vacuum. The reaction

mixture was further purified after extraction on a silica gel column (80 g, eluents: hexane – ether 1:2, hexane – ether 1:4) to afford of product **8c** as white solid (0.22 g, 19%) and **7c** as white solid (0.87 g, 68%).

*N*-(2-(Bromomethyl)-3,3-dimethylbicyclo[2.2.1]heptan-2-yl)-*N'*-tosylacetimidamide (**7c**). White crystals. M.p. 140°C.

<sup>1</sup>H NMR (400 MHz, CDCl<sub>3</sub>) δ 7.78 (d, *J* = 8.4 Hz, 2H), 7.27 – 7.23 (m, 2H), 5.38 (s, 1H), 4.88 (d, *J* = 13.5 Hz, 1H), 3.43 (d, *J* = 10.5 Hz, 1H), 2.43 (s, 1H), 2.40 (s, 6H), 2.30 – 2.19 (m, 1H), 1.85 (d, *J* = 3.4 Hz, 2H), 1.57 – 1.47 (m, 2H), 1.40 (m, 1H), 1.20 (m, 1H), 1.15 (s, 3H), 0.91 (s, 3H).

<sup>13</sup>C NMR (100 MHz, CDCl<sub>3</sub>) δ 165.15, 142.22, 140.46, 129.25, 126.37, 68.74, 51.25, 49.28, 47.27, 35.50, 33.94, 27.04, 23.26, 22.02, 21.67, 21.54, 21.09.

IR: 3980, 3295, 3122, 2955, 2410, 2305, 1546, 1418, 1272, 1140, 1088, 1037, 987, 896, 815, 709, 630, 556 cm<sup>-1</sup>.

Anal. calcd (%) for C<sub>19</sub>H<sub>27</sub>BrN<sub>2</sub>O<sub>2</sub>S: C, 53.39; H, 6.37; Br, 18.70; N, 6.55; S, 7.50; found: C, 53.08; H, 6.32; Br, 18.67; N, 6.64; S, 7.59.

*N*-(1-(Bromomethyl)-7,7-dimethylbicyclo[2.2.1]heptan-2-yl)-4-methylbenzenesulfonamide (**8c**).

White solid. M.p. 154°C.

<sup>1</sup>H NMR (400 MHz, CDCl<sub>3</sub>) δ 7.90 – 7.72 (m, 2H), 7.31 (d, *J* = 7.9 Hz, 2H), 4.53 (d, *J* = 6.4 Hz, 1H), 3.47 (d, *J* = 10.2 Hz, 1H), 3.38 (d, *J* = 10.1 Hz, 1H), 3.27 – 3.15 (m, 1H), 2.44 (m, 3H), 2.09 – 1.91 (m, 1H), 1.85 (d, *J* = 4.4 Hz, 1H), 1.69 (m, 1H), 1.65 – 1.59 (m, 1H), 1.56 (m, 1H), 1.39 (m, 1H), 1.13 (m, 1H), 1.03 (s, 3H), 0.89 (s, 3H).

<sup>13</sup>C (100 MHz, CDCl<sub>3</sub>) δ 143.59, 136.91, 129.72, 127.64, 59.18, 52.83, 48.90, 46.89, 38.69, 34.42, 33.84, 26.41, 21.65, 20.86, 20.64.

IR: 3285, 2904, 2850, 1435, 1260, 1174, 1104, 805, 769, 668, 600 cm<sup>-1</sup>.

Anal. calcd (%) for C<sub>17</sub>H<sub>24</sub>BrNO<sub>2</sub>S: C, 52.85; H, 6.26; Br, 20.68; N, 3.63; S, 8.30; found: C, 53.14; H, 6.31; Br, 20.24; N, 3.59; S, 8.12.

## 19. Addition of phenylsulfonamide **1d** to camphene **2** in the presence of NBS in MeCN.

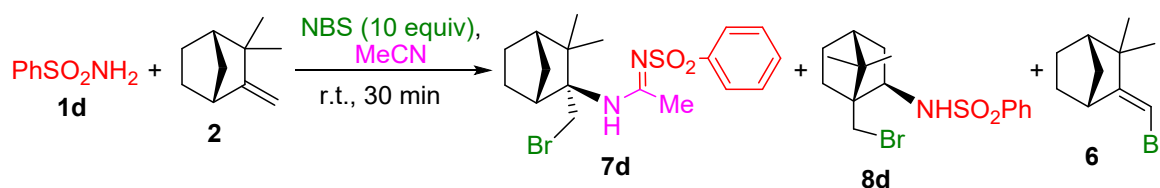

*N*-(2-(Bromomethyl)-3,3-dimethylbicyclo[2.2.1]heptan-2-yl)-*N'*-(phenylsulfonyl)acetimidamide **7(d)** and *N*-(1-(bromomethyl)-7,7-dimethylbicyclo[2.2.1]heptan-2-yl)phenylsulfonamide (**8d**)<sup>3</sup>. The reaction was carried out as above: 0.47 g (3.0 mmol) of phenylsulfonamide **1d**, 4.08 g (30.0 mmol) of **2**, 5.34 g (30.0 mmol) of NBS, 180 ml of MeCN. The mixture was stirred for 30 min. Next, acetonitrile was removed in a vacuum, the resulting residue was dissolved in 15 ml of chloroform. The formed succinimide was extracted three times from the chloroform in a separating funnel by adding 100 mL of water and shaking vigorously. The chloroform was removed in a vacuum. The reaction mixture was further purified after extraction on a silica gel column (80 g, eluents: hexane – ether 1:2, hexane – ether 1:4) to afford of product and **8d** as white solid (0.30 g, 27%) and **7d** as white solid (0.73 g, 59%).

*N*-(2-(Bromomethyl)-3,3-dimethylbicyclo[2.2.1]heptan-2-yl)-*N'*-(phenylsulfonyl)acetimidamide (**7d**).

White solid. M.p. 173°C.

<sup>1</sup>H NMR (400 MHz, CDCl<sub>3</sub>) δ 7.92 (d, *J* = 7.9, 2H), 7.68 – 7.42 (m, 3H), 4.85 (d, *J* = 10.7 Hz, 1H), 3.43 (d, *J* = 10.9 Hz, 1H), 2.43 (s, 3H), 2.25 (m, 1H), 1.87 (m, *J* = 11.3, 7.5 Hz, 2H), 1.58 – 1.46 (m, 2H), 1.46 – 1.35 (m, 2H), 1.19 (m, 1H), 1.14 (s, 3H), 0.88 (s, 3H).

<sup>13</sup>C NMR (100 MHz, CDCl<sub>3</sub>) δ 165.15, 143.30, 131.75, 128.68, 126.35, 68.81, 51.27, 49.34, 47.27, 35.38, 33.93, 27.03, 23.27, 22.01, 21.81, 21.04.

IR: 3368, 2950, 1662, 1359, 1210, 1043, 829, 770, 709, 654, 591 cm<sup>-1</sup>.

Anal. calcd (%) for C<sub>18</sub>H<sub>25</sub>BrN<sub>2</sub>O<sub>2</sub>S: C, 52.30; H, 6.10; Br, 19.33; N, 6.78; S, 7.76; found C, 52.48; H, 6.12; Br, 18.99; N, 6.71; S, 7.80.

*N*-(1-(Bromomethyl)-7,7-dimethylbicyclo[2.2.1]heptan-2-yl)phenylsulfonamide (**8d**)<sup>3</sup>.

White solid. M.p. 147 °C.

<sup>1</sup>H NMR (400 MHz, CDCl<sub>3</sub>): δ 7.91 (d, *J* = 7.3 Hz, 2H), 7.59 (tr, *J* = 7.3 Hz, 1H), 7.53 (d, *J* = 7.3 Hz, 2H), 4.67 (d, *J* = 6.4 Hz, NH, 1H), 3.47 (d, *J* = 10.5 Hz, 1H), 3.34 (d, *J* = 10.5 Hz, 1H), 3.28 – 3.19 (m, 1H), 1.91 - 1.81 (m, 2H), 1.77 – 1.54 (m, 4H), 1.45 – 1.36 (m, 1H), 1.02 (s, 3H), 0.88 (s, 3H).

<sup>13</sup>C NMR (100 MHz, CDCl<sub>3</sub>): δ 140.0, 132.7, 129.0, 127.5, 59.1, 52.8, 48.8, 46.8, 38.9, 34.4, 33.7, 26.3, 20.8, 20.6.

IR: 3289, 2957, 1715, 1460, 1322, 1160, 1095, 1027, 926, 757, 690, 645, 592 cm<sup>-1</sup>.

Anal. calcd (%) for C<sub>16</sub>H<sub>22</sub>BrNO<sub>2</sub>S: C, 51.62; H, 5.96; N, 3.76; S, 8.61; Br, 21.46; found: C, 51.99; H, 6.00; N, 3.61; S, 8.45; Br, 21.02.

## 20. Addition of 4-chlorophenylsulfonamide **1e** to camphene **2** in the presence of NBS in MeCN.

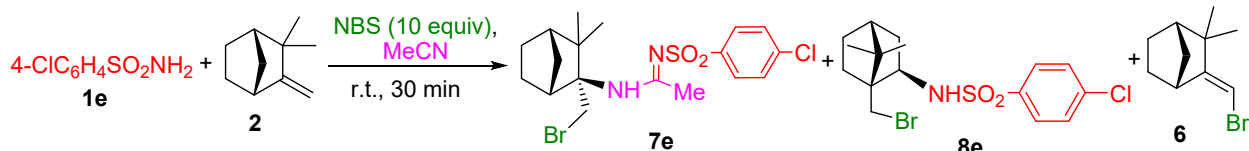

*N*-(2-(Bromomethyl)-7,7-dimethylbicyclo[2.2.1]heptan-2-yl)-*N'*-((4-chlorophenyl)sulfonyl)acetimidamide (**7e**) and *N*-(1-(bromomethyl)-7,7-dimethylbicyclo[2.2.1]heptan-2-yl)-4-chlorobenzenesulfonamide (**8e**). The reaction was carried out as above: 0.57 g (3.0 mmol) of 4-chlorophenylsulfonamide **1e**, 4.08 g (30.0 mmol) of **2**, 5.34 g (30.0 mmol) of NBS, 180 ml of MeCN. The mixture was stirred for 30 min. Next, acetonitrile was removed in a vacuum, the resulting residue was dissolved in 15 ml of chloroform. The formed succinimide was extracted three times from the chloroform in a separating funnel by adding 100 mL of water and shaking vigorously. The chloroform was removed in a vacuum. The reaction mixture was further purified after extraction on a silica gel column (80 g, eluents: hexane – ether 1:2, hexane – ether 1:4) to afford of product **8e** as white solid (0.24 g, 20%) and **7e** as white solid (0.91 g, 62%).

*N*-(2-(Bromomethyl)-7,7-dimethylbicyclo[2.2.1]heptan-2-yl)-*N'*-((4-chlorophenyl)sulfonyl)acetimidamide (**7e**). White solid. M.p. 185°C.

<sup>1</sup>H NMR (400 MHz, CDCl<sub>3</sub>) δ 7.86 (d, *J* = 8.1 Hz, 2H), 7.45 (d, *J* = 8.1 Hz, 2H), 5.26 (s, 1H), 4.78 (d, *J* = 10.7 Hz, 1H), 3.46 (dd, *J* = 17.6, 8.9 Hz, 1H), 2.44 (s, 3H), 2.26 (m, 1H), 1.88 (m, 2H), 1.51 (m, 2H), 1.46 – 1.35 (m, 2H), 1.22 (m, 1H), 1.15 (s, 3H), 0.90 (s, 3H).

<sup>13</sup>C NMR (100 MHz, CDCl<sub>3</sub>) δ 165.22, 141.89, 138.07, 128.97, 127.91, 96.22, 68.93, 51.25, 49.38, 47.29, 35.21, 33.94, 27.05, 23.26, 22.00, 21.17.

IR: 3347, 2896, 1644, 1351, 1199, 1074, 802, 765, 660, 598 cm<sup>-1</sup>.

Anal. calcd (%) for C<sub>18</sub>H<sub>24</sub>BrClN<sub>2</sub>O<sub>2</sub>S: C, 48.28; H, 5.40; Br, 17.84; Cl, 7.92; N, 6.26; S, 7.16; found: C, 48.59; H, 5.54; Br, 17.60; Cl, 7.63; N, 6.25; S, 7.28.

*N*-(1-(Bromomethyl)-7,7-dimethylbicyclo[2.2.1]heptan-2-yl)-4-chlorobenzene-sulfonamide (**8e**). White solid. M.p. 152°C.



$^1\text{H}$  NMR (400 MHz,  $\text{CDCl}_3$ )  $\delta$  7.96 – 7.75 (m, 2H), 7.71 – 7.47 (m, 2H), 4.61 (d,  $J$  = 6.6 Hz, 1H), 3.44 (d,  $J$  = 10.5 Hz, 1H), 3.35 (d,  $J$  = 10.6 Hz, 1H), 3.30 – 3.18 (m, 1H), 2.07 – 1.84 (m, 2H), 1.69 (m, 2H), 1.50 – 1.34 (m, 1H), 1.22 – 1.04 (m, 2H), 1.03 (s, 3H), 0.89 (s, 3H).

$^{13}\text{C}$  NMR (100 MHz,  $\text{CDCl}_3$ )  $\delta$  147.95, 139.35, 138.44, 129.41, 129.11, 59.18, 52.88, 48.94, 46.89, 38.99, 34.50, 33.73, 26.38, 20.78, 20.64.

IR: 3293, 2901, 2752, 1511, 1310, 1170, 1103, 769, 702, 669, 635, 597  $\text{cm}^{-1}$ .

Anal. calcd (%) for  $\text{C}_{16}\text{H}_{21}\text{BrClINO}_2\text{S}$ : C, 47.25; H, 5.20; Br, 19.64; Cl, 8.72; N, 3.44; S, 7.88; found: C, 47.11; H, 5.39; Br, 19.86; Cl, 9.00; N, 3.47; S, 7.59.

## 21. Addition of 4-bromophenylsulfonamide **1f** to camphene **2** in the presence of NBS in MeCN.

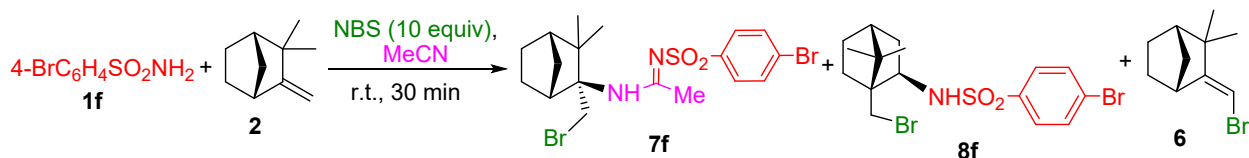

*N*-(2-(Bromomethyl)-3,3-dimethylbicyclo[2.2.1]heptan-2-yl)-*N'*-((4-bromophenyl)sulfonyl)acetamide (**7f**) and *N*-(1-(bromomethyl)-7,7-dimethylbicyclo[2.2.1]heptan-2-yl)-4-bromobenzenesulfonamide (**8f**). The reaction was carried out as above: 0.71 g (3.0 mmol) of 4-bromophenylsulfonamide **1f**, 4.08 g (30.0 mmol) of **2**, 5.34 g (30.0 mmol) of NBS, 180 ml of MeCN. The mixture was stirred for 30 min. Next, acetonitrile was removed in a vacuum, the resulting residue was dissolved in 15 ml of chloroform. The formed succinimide was extracted three times from the chloroform in a separating funnel by adding 100 mL of water and shaking vigorously. The chloroform was removed in a vacuum. The reaction mixture was further purified after extraction on a silica gel column (80 g, eluents: hexane – ether 1:2, hexane – ether 1:4) to afford of product **8f** as white solid (0.30 g, 22%) and **7f** (0.90 g, 61%).

*N*-(2-(Bromomethyl)-3,3-dimethylbicyclo[2.2.1]heptan-2-yl)-*N'*-((4-bromophenyl)sulfonyl)acetamide (**7f**). White solid. M.p. 194°C.

$^1\text{H}$  NMR (400 MHz,  $\text{CDCl}_3$ ):  $\delta$  7.79 (d,  $J$  = 8.5 Hz, 2H), 7.62 (d,  $J$  = 8.5 Hz, 2H), 5.11 (s, 1H), 4.77 (d,  $J$  = 10.8 Hz, 1H), 3.45 (d,  $J$  = 10.9 Hz, 1H), 2.45 (s, 3H), 2.26 (br. m, 1H), 1.91 – 1.84 (m, 2H), 1.53 – 1.34 (m, 3H), 1.28 – 1.21 (m, 2H), 1.16 (s, 3H), 0.90 (s, 3H).

$^{13}\text{C}$  NMR (100 MHz,  $\text{CDCl}_3$ ):  $\delta$  165.2, 142.4, 131.9, 128.0, 126.5, 68.9, 51.2, 49.4, 47.2, 35.2, 33.9, 27.0, 23.2, 22.0, 22.0, 21.1.

IR: 3285, 2955, 1773, 1700, 1575, 1471, 1433, 1390, 1349, 1329, 1168, 1068, 1009, 915, 819, 741, 644, 621  $\text{cm}^{-1}$ .

HRMS (ESI):  $m/z$  calcd for  $\text{C}_{18}\text{H}_{25}\text{Br}_2\text{N}_2\text{O}_2\text{S}$ : 491,0003; (M+H); found: 491,0006.

Anal. calcd (%) for  $\text{C}_{18}\text{H}_{24}\text{Br}_2\text{N}_2\text{O}_2\text{S}$ : C, 43.92; H, 4.91; N, 5.69; Br, 32.46; found: C, 43.83; H, 5.00; N, 5.63; Br, 32.32.

*N*-(1-(Bromomethyl)-7,7-dimethylbicyclo[2.2.1]heptan-2-yl)-4-bromobenzene-sulfonamide (**8f**). White solid. M.p. 160°C.

$^1\text{H}$  NMR (400 MHz,  $\text{CDCl}_3$ )  $\delta$  7.88 – 7.71 (d,  $J$  = 10.4 Hz, 2H), 7.71 – 7.60 (d,  $J$  = 10.4 Hz, 2H), 4.74 (d,  $J$  = 6.7 Hz, 1H), 3.46 (d,  $J$  = 10.6 Hz, 1H), 1.89 (m, 1H), 1.77 – 1.66 (m, 2H), 1.21 – 1.10 (m, 1H), 1.02 (s, 3H), 0.89 (s, 3H).

$^{13}\text{C}$  NMR (100 MHz,  $\text{CDCl}_3$ )  $\delta$  147.95, 139.35, 138.44, 129.41, 129.11, 77.42, 77.10, 76.78, 59.18, 52.88, 48.94, 46.89, 38.99, 34.50, 33.73, 26.38, 20.78, 20.64.

IR: 3263, 2817, 2756, 1402, 1326, 1191, 1114, 800, 765, 669, 599  $\text{cm}^{-1}$ .

Anal. calcd (%) for  $\text{C}_{16}\text{H}_{21}\text{Br}_2\text{NO}_2\text{S}$ : C, 42.59; H, 4.69; Br, 35.42; N, 3.10; S, 7.11; found: C, 42.17; H, 4.74; Br, 35.02; N, 3.09; S, 7.18.

## 22. Addition of 4-nitrobenzenesulfonamide **1g** to camphene in the presence of NBS in MeCN.

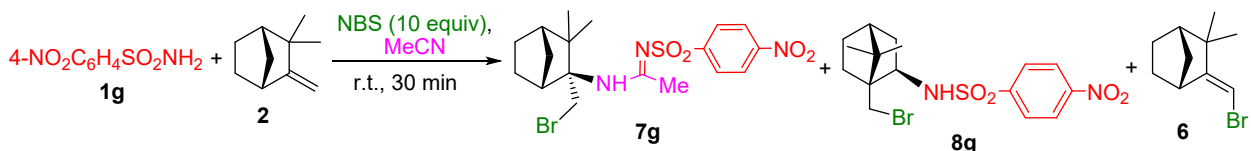

*N*-(2-(Bromomethyl)-7,7-dimethylbicyclo[2.2.1]heptan-2-yl)-*N'*-((4-nitrophenyl)sulfonyl)acetimidamide (**7g**) and *N*-(1-(bromomethyl)-7,7-dimethylbicyclo[2.2.1]heptan-2-yl)-4-nitrophenylsulfonamide (**8g**). The reaction was carried out as above: 0.61 g (3.0 mmol) of 4-nitrobenzenesulfonamide **1g**, 4.08 g (30.0 mmol) of **2**, 5.34 g (30.0 mmol) of NBS, 180 ml of MeCN. The mixture was stirred for 30 min. Next, acetonitrile was removed in a vacuum, the resulting residue was dissolved in 15 ml of chloroform. The formed succinimide was extracted three times from the chloroform in a separating funnel by adding 100 mL of water and shaking vigorously. The chloroform was removed in a vacuum. The reaction mixture was further purified after extraction on a silica gel column (80 g, eluents: hexane – ether 1:2, eluents: hexane – ether 1:4) to afford of product **8g** as white solid (0.33 g, 26%) and **7g** as white solid (0.81 g, 59%).

*N*-(2-(Bromomethyl)-7,7-dimethylbicyclo[2.2.1]heptan-2-yl)-*N'*-((4-nitrophenyl)sulfonyl)acetimidamide (**7g**). White solid. M.p. 198°C.

$^1\text{H}$  NMR (400 MHz, Acetone- $d_6$ )  $\delta$  8.76 – 8.29 (m, 2H), 8.29 – 8.11 (m, 2H), 7.45 (br.s, 1H), 4.98 (d,  $J$  = 10.7 Hz, 1H), 3.66 (d,  $J$  = 10.7 Hz, 1H), 2.49 (s, 3H), 2.26 – 1.97 (m, 2H), 1.77 – 1.59 (m, 1H), 1.52 – 1.32 (m, 2H), 1.32 – 1.22 (m, 1H), 1.19 (s, 3H), 0.96 (s, 3H).

$^{13}\text{C}$  NMR (100 MHz, Acetone- $d_6$ ) 166.97, 150.55, 128.51, 124.98, 69.64, 51.99, 49.39, 48.19, 36.63, 34.63, 27.40, 23.71, 22.64, 21.33, 21.08.

IR: 3332, 2911, 1610, 1265, 1207, 1123, 902, 836, 712, 658, 601  $\text{cm}^{-1}$ .

Anal. calcd (%) for  $\text{C}_{18}\text{H}_{24}\text{BrN}_3\text{O}_4\text{S}$ : C, 47.17; H, 5.28; Br, 17.43; N, 9.17; S, 6.99; found: C, 46.98; H, 5.24; Br, 17.68; N, 9.01; S, 7.16.

*N*-(1-(Bromomethyl)-7,7-dimethylbicyclo[2.2.1]heptan-2-yl)-4-nitrophenylsulfonamide (**8g**). White solid. M.p. 171  $^\circ\text{C}$ .

$^1\text{H}$  NMR (400 MHz,  $\text{CDCl}_3$ ):  $\delta$  8.37 (d,  $J$  = 8.7 Hz, 2H), 8.11 (d,  $J$  = 8.7 Hz, 2H), 4.91 (d,  $J$  = 7.0 Hz, 1H), 3.42 (d,  $J$  = 10.7 Hz, 1H), 3.33 (d,  $J$  = 10.7 Hz, 1H), 3.29 (dt,  $J$  = 7.9, 4.0 Hz, 1H), 1.96 – 1.85 (m, 2H), 1.80 – 1.63 (m, 3H), 1.49 – 1.34 (m, 1H), 1.21 – 1.10 (m, 1H), 1.03 (s, 3H), 0.89 (s, 3H).

$^{13}\text{C}$  NMR (100 MHz,  $\text{CDCl}_3$ ):  $\delta$  150.3, 145.7, 128.9, 124.3, 59.2, 52.9, 49.0, 46.8, 39.4, 34.5, 33.6, 26.3, 20.69, 20.66.

Anal. calcd (%) for  $\text{C}_{16}\text{H}_{21}\text{BrN}_2\text{O}_4\text{S}$ : C, 46.05; H, 5.07; N, 6.71; S, 7.68; Br, 19.15; found: C, 46.14; H, 5.09; N, 6.63; S, 7.73; Br, 19.45.

### 23. Addition of 2-(trifluoromethyl)benzenesulfonamide **1h** to camphene **2** in the presence of NBS in MeCN.

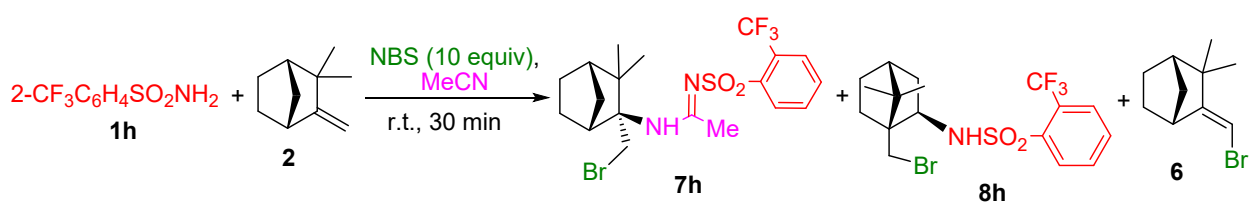

*N*-(1-(Bromomethyl)-7,7-dimethylbicyclo[2.2.1]heptan-2-yl)-*N'*-((2-(trifluoromethyl)phenyl)sulfonyl)acetimidamide (**7h**) and *N*-(1-(bromomethyl)-7,7-dimethylbicyclo[2.2.1]heptan-2-yl)-2-(trifluoromethyl)benzenesulfonamide (**8h**). The reaction was carried out as above: 0.67 g (3.0 mmol) of 2-(trifluoromethyl)benzenesulfonamide **1h**, 4.08 g (30.0 mmol) of **2**, 5.34 g (30.0 mmol) of NBS, 180 ml of MeCN. The mixture was stirred for 30 min. Next, acetonitrile was removed in a vacuum, the resulting residue was dissolved in 15 ml of chloroform. The formed succinimide was extracted three times from the chloroform in a separating funnel by adding 100 mL of water and shaking vigorously. The chloroform was removed

in a vacuum. The reaction mixture was further purified after extraction on a silica gel column (80 g, eluents: hexane – ether 1:2, : hexane – ether 1:4) to afford of product **8h** as white solid (0.47 g, 24%) and **7h** as white solid (0.81 g, 57%).

*N*-(1-(Bromomethyl)-7,7-dimethylbicyclo[2.2.1]heptan-2-yl)-*N'*-((2-(trifluoromethyl)phenyl)sulfonyl)acetimidamide (**7h**). White solid. M.p. 145°C.

<sup>1</sup>H NMR (400 MHz, CDCl<sub>3</sub>) δ 8.29 (d, *J* = 7.9 Hz, 1H), 7.82 (d, *J* = 7.9 Hz, 1H), 7.69 (m, 2H), 5.38 (br. s, 1H), 4.66 (d, *J* = 10.7 Hz, 1H), 3.35 (d, *J* = 10.7 Hz, 1H), 2.51 (s, 3H), 2.26 (m, 1H), 1.83 (m, 2H), 1.50 (m, 1H), 1.22 – 1.15 (m, 1H), 1.10 (s, 3H), 0.89 (m, 1H), 0.75 (s, 3H).

<sup>13</sup>C NMR (100 MHz, CDCl<sub>3</sub>) δ 164.82, 141.96, 132.16, 131.85, 130.53, 130.50, 127.81 (q, <sup>3</sup>*J* = 6.2 Hz), 127.43, (q, <sup>2</sup>*J* = 33.2 Hz), 123.02 (q, <sup>1</sup>*J* = 274.2 Hz), 68.87, 51.33, 49.40, 47.16, 35.12, 33.90, 29.77, 26.82, 23.26, 22.20, 21.99, 20.73.

IR: 3393, 2915, 1563, 1277, 1140, 1066, 796, 751, 603 cm<sup>-1</sup>.

HRMS (ESI): *m/z* calcd for C<sub>19</sub>H<sub>25</sub>BrF<sub>3</sub>N<sub>2</sub>O<sub>2</sub>S<sup>+</sup>: 481.0772 (M+H)<sup>+</sup>; found: 481.0772.

Anal. calcd (%) for C<sub>19</sub>H<sub>24</sub>BrF<sub>3</sub>N<sub>2</sub>O<sub>2</sub>S: C, 47.41; H, 5.03; Br, 16.60; F, 11.84; N, 5.82; S, 6.66; found: C, 47.58; H, 5.18; Br, 16.22; F, 11.53; N, 5.80; S, 6.60.

*N*-(1-(Bromomethyl)-7,7-dimethylbicyclo[2.2.1]heptan-2-yl)-2-(trifluoromethyl)benzenesulfonamide (**8h**). White solid. M.p. 137°C.

<sup>1</sup>H NMR (400 MHz, CDCl<sub>3</sub>) δ 8.25 (m, 1H), 7.87 (m, 1H), 7.71 (m, 2H), 4.97 – 4.73 (d, *J* = 7.2 Hz, 1H), 3.42 (d, *J* = 10.4 Hz, 1H), 3.41 (m, 1H), 3.32 (d, *J* = 10.5 Hz, 1H), 1.85 (m, 1H), 1.68 (m, 3H), 1.62 – 1.55 (m, 1H), 1.42 (m, 1H), 1.14 – 1.05 (m, 1H), 0.97 (s, 3H), 0.88 (s, 3H).

<sup>13</sup>C NMR (101 MHz, CDCl<sub>3</sub>) δ 139.20, 132.73, 132.39, 131.90, 128.57 (q, <sup>3</sup>*J*<sub>C-F</sub> = 6.4 Hz), 127.62 (q, <sup>2</sup>*J*<sub>C-F</sub> = 32.7 Hz), 123.22 (q, <sup>1</sup>*J*<sub>C-F</sub> = 273.8 Hz), 59.15, 52.71, 48.76, 46.71, 39.50, 34.43, 33.29, 26.26.

<sup>19</sup>F NMR (376 MHz, CDCl<sub>3</sub>) δ -57.68.

IR: 3396, 2900, 1617, 1200, 1136, 1020, 899, 743, 620, 599 cm<sup>-1</sup>.

HRMS (ESI): *m/z* calcd for C<sub>17</sub>H<sub>22</sub>BrF<sub>3</sub>NO<sub>2</sub>S<sup>+</sup>: 440.0507 (M+H)<sup>+</sup>; found: 440.0508.

**24. Addition of 4-(trifluoromethyl)benzenesulfonamide 1i to camphene 2 in the presence of NBS in MeCN.**

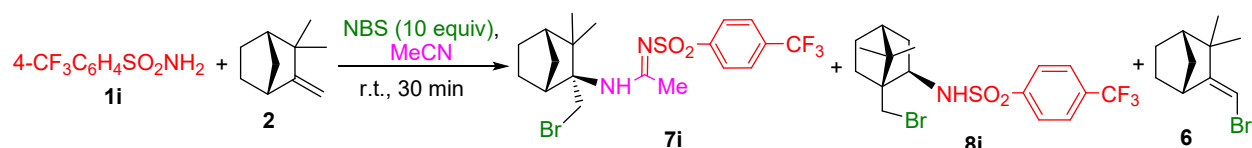

*N*-(1-(Bromomethyl)-7,7-dimethylbicyclo[2.2.1]heptan-2-yl)-*N'*-((4-(trifluoromethyl)phenyl)sulfonyl)acetimidamide (**7i**) and *N*-(1-(bromomethyl)-7,7-dimethylbicyclo[2.2.1]heptan-2-yl)-4-(trifluoromethyl)benzenesulfonamide (**8i**). The reaction was carried out as above: 0.68 g (3.0 mmol) of 4-(trifluoromethyl)benzenesulfonamide **1i**, 4.08 g (30.0 mmol) of **2**, 5.34 g (30.0 mmol) of NBS, 180 ml of MeCN. The mixture was stirred for 30 min. Next, acetonitrile was removed in a vacuum, the resulting residue was dissolved in 15 ml of chloroform. The formed succinimide was extracted three times from the chloroform in a separating funnel by adding 100 mL of water and shaking vigorously. The chloroform was removed in a vacuum. The reaction mixture was further purified after extraction on a silica gel column (80 g, eluents: hexane – ether 1:2, hexane – ether 1:4) to afford of product **8i** as white solid (0.33 g, 25%) and **7i** as white solid (0.90 g, 63%).

*N*-(1-(Bromomethyl)-7,7-dimethylbicyclo[2.2.1]heptan-2-yl)-*N'*-((4-(trifluoromethyl)phenyl)sulfonyl)acetimidamide (**7i**). White solid. M.p. 146°C.

<sup>1</sup>H NMR (400 MHz, CDCl<sub>3</sub>) δ 8.02 (d, *J* = 8.5 Hz, 2H), 7.75 (d, *J* = 8.6 Hz, 2H), 5.76 (br. s, 1H), 4.78 (d, *J* = 10.8 Hz, 1H), 3.42 (d, *J* = 10.8 Hz, 1H), 2.44 (s, 3H), 2.26 (m, 1H), 1.98 – 1.76 (m, 2H), 1.58 – 1.45 (m, 2H), 1.38 (m, 1H), 1.23 – 1.17 (m, 1H), 1.12 (s, 3H), 0.87 (s, 3H).

<sup>13</sup>C NMR (100 MHz, CDCl<sub>3</sub>) δ 165.78, 146.66, 133.51 (q, <sup>2</sup>*J*<sub>C-F</sub> = 32.9 Hz), 126.83, 125.88 (q, <sup>3</sup>*J*<sub>C-F</sub> = 3.8 Hz), 123.48 (q, <sup>1</sup>*J*<sub>C-F</sub> = 273.0 Hz), 69.06, 51.11, 49.09, 47.31, 35.17, 33.95, 26.99, 23.17, 21.98, 21.84, 21.12.

<sup>19</sup>F NMR (376 MHz, CDCl<sub>3</sub>) δ -62.67.

IR: 3404, 2810, 1499, 1297, 1143, 1102, 797, 711, 651, 588 cm<sup>-1</sup>.

Anal. calcd (%) for C<sub>19</sub>H<sub>24</sub>BrF<sub>3</sub>N<sub>2</sub>O<sub>2</sub>S: C, 47.41; H, 5.03; Br, 16.60; F, 11.84; N, 5.82; S, 6.66; found: C, 46.99; H, 5.08; Br, 16.36; F, 11.71; N, 5.92; S, 6.79.

*N*-(1-(Bromomethyl)-7,7-dimethylbicyclo[2.2.1]heptan-2-yl)-4-(trifluoromethyl)benzenesulfonamide (**8i**). White solid. M.p. 140°C.

<sup>1</sup>H NMR (400 MHz, CDCl<sub>3</sub>) δ 8.23 – 7.93 (d, *J* = 8.2 Hz, 2H), 7.79 (d, *J* = 8.2 Hz, 2H), 5.16 (d, *J* = 7.0 Hz, 1H), 3.46 (d, *J* = 10.6 Hz, 1H), 3.35 (d, *J* = 10.6 Hz, 1H), 3.34 (m, 1H), 1.87 (d, *J* = 3.6 Hz, 2H), 1.80 – 1.62 (m, 3H), 1.41 (m, 1H), 1.11 (m, 1H), 1.01 (s, 3H), 0.88 (s, 3H).

<sup>13</sup>C NMR (101 MHz, CDCl<sub>3</sub>) δ 143.74, 134.38 (q, *J* = 32.6 Hz), 128.09, 126.24 (q, *J* = 3.8 Hz), 123.54 (q, *J* = 273.4 Hz) 59.10, 52.90, 48.88, 46.82, 39.29, 34.57, 33.65, 26.31, 20.71, 20.60.

<sup>19</sup>F NMR (376 MHz, CDCl<sub>3</sub>) δ -62.80.

IR: 3310, 2897, 1540, 1302, 1104, 1009, 800, 762, 667, 600, 568  $\text{cm}^{-1}$ .

Anal. calcd (%) for  $\text{C}_{17}\text{HBrF}_3\text{NO}_2\text{S}$ : C, 46.37; H, 4.81; Br, 18.15; F, 12.94; N, 3.18; S, 7.28; found: C, 46.71; H, 4.90; Br, 17.91; F, 12.77; N, 3.10; S, 7.56.

## 25. Addition of sulfamide 1j to camphene 2 in the presence of NIS in MeCN.

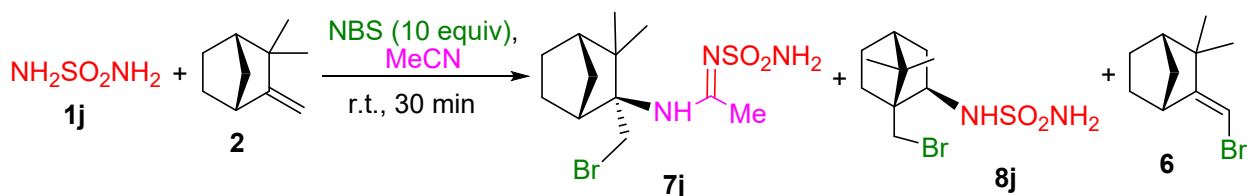

*N*-(1-(Bromomethyl)-7,7-dimethylbicyclo[2.2.1]heptan-2-yl)-*N'*-sulfamoylacetimidamide (**7j**) and *N*-(1-(Bromomethyl)-7,7-dimethylbicyclo[2.2.1]heptan-2-yl)sulfamide (**8j**). The reaction was carried out as above: 0.29 g (3.0 mmol) of sulfamide **1j**, 4.08 g (30.0 mmol) of **2**, 5.34 g (30.0 mmol) of NBS, 180 ml of MeCN. The mixture was stirred for 30 min. Next, acetonitrile was removed in a vacuum, the resulting residue was dissolved in 15 ml of chloroform. The formed succinimide was extracted three times from the chloroform in a separating funnel by adding 100 mL of water and shaking vigorously. The chloroform was removed in a vacuum. The reaction mixture was further purified after extraction on a silica gel column (80 g, eluents: hexane – ether 1:2, hexane – ether 1:4) to afford of product **8j** (0.19 g, 20%) and **7j** as white solid (0.55 g, 52%).

*N*-(1-(Bromomethyl)-7,7-dimethylbicyclo[2.2.1]heptan-2-yl)-*N'*-sulfamoylacetimidamide (**7j**). White solid. M.p. 113°C.

$^1\text{H}$  NMR (400 MHz, acetone- $d_6$ )  $\delta$  6.79 (br. s, 1H), 5.80 (br. s, 2H), 5.37 (d,  $J$  = 10.5 Hz, 1H), 3.69 (d,  $J$  = 10.5 Hz, 1H), 2.83 (m, 1H), 2.39 (s, 3H), 2.37 (m, 1H), 1.89 (m, 1H), 1.74 – 1.68 (m, 1H), 1.44 – 1.38 (m, 1H), 1.34 (m, 2H), 1.30 (s, 3H), 1.16 (s, 3H).

$^{13}\text{C}$  NMR (100 MHz,  $\text{CDCl}_3$ )  $\delta$  166.37, 69.48, 53.03, 50.38, 48.83, 38.26, 35.38, 28.34, 24.65, 23.48, 22.16, 20.64.

IR: 3341, 3006, 1520, 1270, 1136, 1072, 800, 756, 661, 589  $\text{cm}^{-1}$ .

Anal. calcd (%) for  $\text{C}_{12}\text{H}_{22}\text{BrN}_3\text{O}_2\text{S}$ : C, 40.91; H, 6.29; Br, 22.68; N, 11.93; S, 9.10; found: C, 40.57; H, 6.32; Br, 22.52; N, 12.04; S, 9.30.

*N*-(1-(Bromomethyl)-7,7-dimethylbicyclo[2.2.1]heptan-2-yl)sulfamide (**8j**). White solid. M.p. 107°C.

$^1\text{H}$  NMR (400 MHz,  $\text{CDCl}_3$ )  $\delta$  4.79 (s, 2H), 4.66 (d,  $J$  = 8.8 Hz, 1H), 3.62 (d,  $J$  = 10.3 Hz, 1H), 3.57 (m, 1H), 3.43 (d,  $J$  = 10.3 Hz, 1H), 1.99 (m, 3H), 1.77 (s, 2H), 1.57 (m, 1H), 1.21 (m, 1H), 1.00 (m, 3H), 0.92 (s, 3H).

$^{13}\text{C}$  NMR (100 MHz,  $\text{CDCl}_3$ )  $\delta$  59.39, 52.74, 48.97, 46.85, 39.88, 35.10, 34.62, 26.41, 20.79, 20.60.

IR: 3301, 3073, 2962, 1652, 1538, 1471, 1418, 1371, 1310, 1237, 1164, 1081, 1032, 944, 758, 641, 549  $\text{cm}^{-1}$ .

Anal. calcd (%) for  $\text{C}_{10}\text{H}_{19}\text{BrN}_2\text{O}_2\text{S}$ : C, 38.59; H, 6.15; Br, 25.67; N, 9.00; S, 10.30; found: C, 38.40; H, 6.07; Br, 25.55; N, 8.89; S, 10.09.

## 26. Addition of methanesulfonamide **1k** to camphene **2** in the presence of NBS in acetonitrile

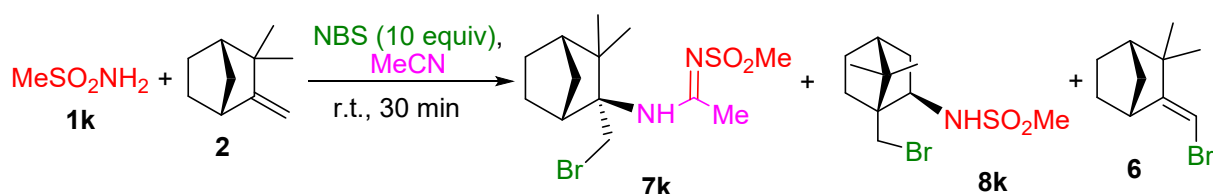

*N*-(2-(Bromomethyl)-3,3-dimethylbicyclo[2.2.1]heptan-2-yl)-*N'*-(methylsulfonyl)acetamide (**7k**) and *N*-(1-(bromomethyl)-7,7-dimethylbicyclo[2.2.1]heptan-2-yl)methanesulfonamide (**8k**). The reaction was carried out as above: 0.29 g (3.0 mmol) of methanesulfonamide **1k**, 4.08 g (30.0 mmol) of **2**, 5.34 g (30.0 mmol) of NBS, 180 ml of MeCN. The mixture was stirred for 30 min. Next, acetonitrile was removed in a vacuum, the resulting residue was dissolved in 15 ml of chloroform. The formed succinimide was extracted three times from the chloroform in a separating funnel by adding 100 mL of water and shaking vigorously. The chloroform was removed in a vacuum. The reaction mixture was further purified after extraction on a silica gel column (80 g, eluents: hexane – ether 1:2, hexane – ether 1:4) to afford of product **8k** (0.28 g, 30%) and **7k** as white solid (0.46 g, 42%).

*N*-(2-(Bromomethyl)-3,3-dimethylbicyclo[2.2.1]heptan-2-yl)-*N'*-(methylsulfonyl)acetamide (**7k**). White solid. M.p. 144°C.

$^1\text{H}$  NMR (400 MHz,  $\text{CDCl}_3$ ):  $\delta$  5.07 (s, 1H), 4.96 (d,  $J$  = 10.7 Hz, 1H), 3.56 (d,  $J$  = 10.7 Hz, 1H), 3.00 (s, 3H), 2.46 (s, 3H), 2.32 – 2.26 (m, 1H), 1.96 – 1.88 (m, 2H), 1.62 – 1.55 (m, 3H), 1.53 – 1.38 (m, 2H), 1.24 (s, 3H), 1.08 (s, 3H).

$^{13}\text{C}$  NMR (100 MHz,  $\text{CDCl}_3$ ):  $\delta$  164.9, 68.6, 49.5, 51.3, 47.2, 43.0, 35.1, 33.9, 27.1, 23.3, 22.0, 21.9, 21.3.



IR: 3308, 2964, 1571, 1544, 1446, 1273, 1141, 1087, 977, 757, 691, 639, 586 cm<sup>-1</sup>.

HRMS (ESI): *m/z* calcd for C<sub>13</sub>H<sub>24</sub>BrN<sub>2</sub>O<sub>2</sub>S<sup>+</sup>: 351,07419 (M+H)<sup>+</sup>; found: 351,07428.

*N*-(1-(Bromomethyl)-7,7-dimethylbicyclo[2.2.1]heptan-2-yl)methanesulfonamide

(**8k**). White solid. M.p. 105°C.

<sup>1</sup>H NMR (400 MHz, CDCl<sub>3</sub>): δ 4.68 (d, *J* 8.7 Hz, 1H), 3.58 (d, *J* = 10.3 Hz, 1H), 3.51 (dt, *J* = 8.6, 4.3 Hz, 1H), 3.41 (d, *J* = 10.3 Hz, 1H), 3.05 (s, 3H), 2.00 (m, 3H), 1.80 – 1.71 (m, 2H), 1.55 (t, *J* = 9.4 Hz, 1H), 1.20 (t, *J* = 8.9 Hz, 1H), 1.01 (s, 3H), 0.92 (s, 3H).

<sup>13</sup>C NMR (100 MHz, CDCl<sub>3</sub>): δ 59.13, 52.66, 48.94, 46.88, 41.28, 40.84, 34.68, 34.45, 26.36, 20.79, 20.65.

IR: 3342, 2957, 2719, 1703, 1635, 1595, 1539, 1266, 1143, 1086, 1029, 805, 462, 604, 566 cm<sup>-1</sup>.

HRMS (ESI): *m/z* calcd for C<sub>11</sub>H<sub>21</sub>BrNO<sub>2</sub>S<sup>+</sup>: 310.04764 (M+H)<sup>+</sup>; found: 310.04779.

## 27. Addition of triflamide **1a** to camphene **2** in the presence of NBS in CH<sub>2</sub>Cl<sub>2</sub>.

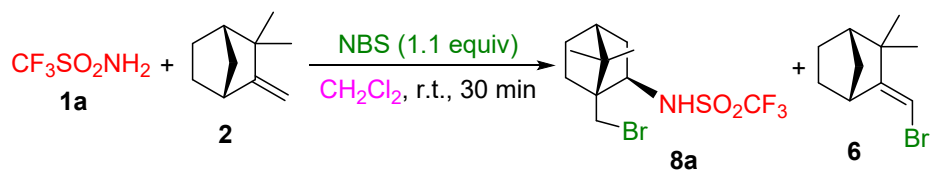

*N*-(1-(Bromomethyl)-7,7-dimethylbicyclo[2.2.1]heptan-2-yl)-trifluoromethanesulfonamide (**8a**). The reaction was carried out as mentioned above: 1 g (6.7 mmol) of triflamide **1a**, 0.91 g (6.7 mmol) of camphene **2**, 1.31 g (7.4 mmol) of NBS were dissolved in 40 ml of CH<sub>2</sub>Cl<sub>2</sub>. The mixture was stirred on a magnetic stirrer for 30 min. The solvent was removed in a vacuum, the resulting residue was washed with 50 ml of diethyl ether, and after cooling, the succinimide was filtered off, and the solvent was distilled in a vacuum. The residue was purified on a silica gel column (80 g, eluents: hexane - ether 3:1, hexane - ether 1:2) to afford 0.37 g (14%) of product **6** and 1.56 g (77%) of product **8a**.

## 28. Addition of methanesulfonamide **1k** to camphene **2** in the presence of NIS in MeCN.

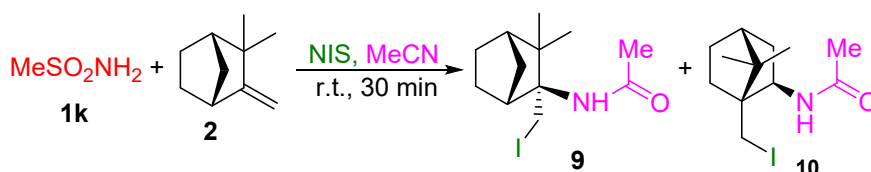



*N*-(2-(iodomethyl)-3,3-dimethylbicyclo[2.2.1]heptan-2-yl)acetamide (**9**) and *N*-(1-(iodomethyl)-7,7-dimethylbicyclo[2.2.1]heptan-2-yl)acetamide (**10**).

The reaction was carried out as mentioned above: 1 g (10.5 mmol) of methanesulfonamide **1k**, 1.43 g (10.5 mmol) of **2**, 2.61 g (11.6 mmol) of NIS, 40 ml of MeCN. The mixture was stirred for 30 min. Next, acetonitrile was removed in a vacuum, the resulting residue was dissolved in 15 ml of chloroform. The formed succinimide was extracted three times from the chloroform in a separating funnel by adding 100 mL of water and shaking vigorously. The chloroform was removed in a vacuum. The reaction mixture was purified on a silica gel column (80 g; eluents: hexane - ether 3:1, hexane - ether 1:4) to afford 1.42 g (42%) of product **9** and 0.68 g (20%) of product **10**.

*N*-(2-(iodomethyl)-3,3-dimethylbicyclo[2.2.1]heptan-2-yl)acetamide (**9**). White solid. M.p. 159°C.

<sup>1</sup>H NMR (400 MHz, CDCl<sub>3</sub>): δ 5.27 (s, 1H), 4.82 (d, *J* = 10.5 Hz, 1H), 3.45 (d, *J* = 10.3 Hz, 1H), 2.17 – 2.10 (m, 1H), 2.04 – 2.00 (m, 1H), 2.00 (s, 3H), 1.94 – 1.88 (m, 1H), 1.65 – 1.53 (m, 2H), 1.48 – 1.34 (m, 2H), 1.24 – 1.18 (m, 1H), 1.16 (s, 3H), 1.09 (s, 3H).

<sup>13</sup>C NMR (100 MHz, CDCl<sub>3</sub>): δ 170.4, 65.9, 51.8, 50.7, 45.8, 33.5, 27.3, 24.0, 22.4, 22.3, 21.7, 15.1.

HRMS (ESI): *m/z* calcd for C<sub>12</sub>H<sub>21</sub>ONI<sup>+</sup>: (M+H)<sup>+</sup> 322,06679; found: 322,06663.

*N*-(1-(iodomethyl)-7,7-dimethylbicyclo[2.2.1]heptan-2-yl)acetamide (**10**). White solid. M.p. 165°C.

<sup>1</sup>H NMR (400 MHz, CDCl<sub>3</sub>): δ 5.52 (s, NH, 1H), 4.07 (dt, *J* = 8.9, 4.8 Hz, 1H), 3.19 (d, *J* = 9.9 Hz, 1H), 3.12 (d, *J* = 9.9 Hz, 1H), 2.11 – 2.03 (m, 1H), 1.99 (s, 3H), 1.98 – 1.90 (m, 1H), 1.79 – 1.70 (m, 1H), 1.69 – 1.59 (m, 2H), 1.35 – 1.12 (m, 2H), 0.99 (s, 3H), 0.93 (s, 3H).

<sup>13</sup>C NMR (100 MHz, CDCl<sub>3</sub>): δ 169.0, 55.4, 51.4, 48.3, 47.0, 39.4, 36.4, 26.3, 23.8, 20.8, 20.6, 6.6.

HRMS (ESI): *m/z* calcd for C<sub>12</sub>H<sub>21</sub>ONI 322,06679; found 322,06656.

Anal. calcd (%) for C<sub>12</sub>H<sub>20</sub>INO: C, 44.87; H, 6.28; N, 4.36; I, 39.51; found: C, 44.69; H, 6.26; N, 4.31; I, 39.45.

**29. Addition of triflamide 1a to camphene 2 in the presence of *t*-BuOCl+Nal in MeCN.**

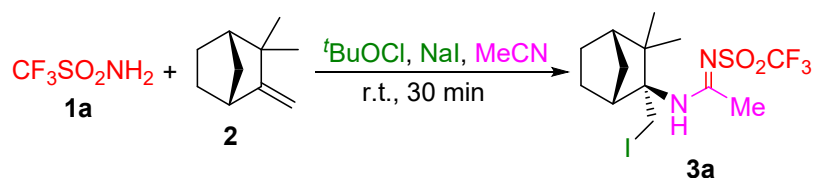

**Reaction with triflamide 1a.** 1 g (6.7 mmol) of triflamide **1a**, 0.92 g (6.7 mmol) of camphene **2**, and 2.51 g (16.8 mmol) of NaI were dissolved in 40 mL of MeCN. The mixture was cooled to  $-30\text{ }^{\circ}\text{C}$  and 1.92 ml (16.8 mmol) of *t*-BuOCl was added dropwise and stirred on a magnetic stirrer for 2 hours at  $-30\text{ }^{\circ}\text{C}$ . Next, MeCN was removed in a vacuum, the residue was dissolved in 50 ml of ether, washed with 10 ml of an aqueous solution of sodium thiosulfate, the extract was dried under  $\text{CaCl}_2$ , and the solvent was removed in a vacuum. The residue was purified on a silica gel column (eluent: hexane – ether 3:1, hexane – ether 1:4) (1.30 g, 43%) of product **3a**.

### 30. Addition of phenylsulfonamide 1d to camphene 2 in the presence of *t*-BuOCl+NaI in MeCN.

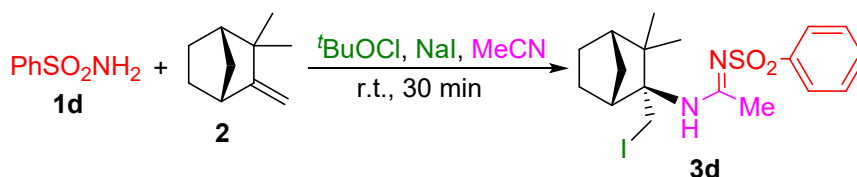

**Reaction with phenylsulfonamide 1d.** The reaction was carried out as mentioned above (1 g (6.4 mmol) of phenylsulfonamide **1d**, 0.92 g (6.4 mmol) of **2**, 2.4 g (16.0 mmol) of NaI, 1.85 mL (16.0 mmol) *t*-BuOCl, 40 ml of MeCN). The reaction mixture was purified on a silica gel column (80 g; eluent: hexane - ether 3:1, hexane - ether 1:4) to afford 1.40 g (45%) of product **3d**.

### 31. Addition of tosylamide 1c to camphene 2 in the presence of NBS in $\text{CH}_2\text{Cl}_2$ .

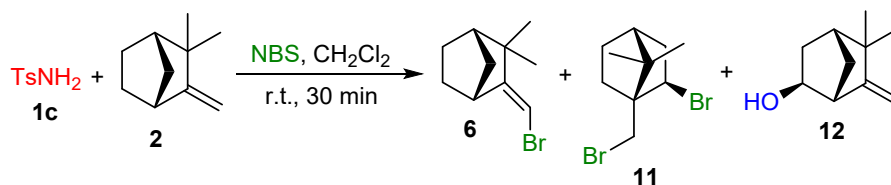

**2-Bromo-1-(bromomethyl)-7,7-dimethylbicyclo[2.2.1]heptane (11) and 5,5-dimethyl-6-methylenebicyclo[2.2.1]heptan-2-ol<sup>3</sup> (12).** The reaction was carried out as mentioned above: 1 g (5.8 mmol) of tosylamide **1c**, 0.79 g (5.8 mmol) of camphene **2**, 1.13 g (6.4 mmol) of NBS, 40 ml of  $\text{CH}_2\text{Cl}_2$ . The reaction mixture was purified on a silica gel column (80 g; eluent: hexane - ether 3:1, 2:1, 1:1) to afford 0.34 g (27%) of product **6**, 0.24 g (14%) of product **11** and 0.18 g (21%) of product **12**.

*2-Bromo-1-(bromomethyl)-7,7-dimethylbicyclo[2.2.1]heptane*<sup>4</sup> (**11**). White solid.

M.p. 56°C.

<sup>1</sup>H NMR (400 MHz, CDCl<sub>3</sub>): δ 4.27 (dd, *J* = 8.5, 4.6 Hz, 1H), 3.78 (d, *J* = 9.9 Hz, 1H), 3.49 (d, *J* = 9.8 Hz, 1H), 2.53 – 2.37(m, 1H), 2.24 – 2.13 (m, 1H), 2.05 – 1.89 (m, 2H), 1.87 – 1.75 (m, 1H), 1.67 - 1.50 (m, 1H), 1.22 (s, 3H), 1.03 (m, 1H), 0.95 (s, 3H).

<sup>13</sup>C NMR (100 MHz, CDCl<sub>3</sub>): δ 56.7, 53.1, 49.4, 48.4, 42.1, 37.2, 34.5, 26.4, 21.0, 20.4.

IR: 2989, 2958, 2884, 1731, 1458, 1305, 1231, 1103, 951, 831, 758, 649, 573 cm<sup>-1</sup>.

Anal. calcd (%) for C<sub>10</sub>H<sub>16</sub>Br<sub>2</sub>: C, 40.57; H, 5.45; Br, 53.98; found: C, 40.97; H, 5.49; Br, 53.88.

*5,5-Dimethyl-6-methylenebicyclo[2.2.1]heptan-2-ol*<sup>5</sup> (**12**). White solid. M.p. 176°C.

<sup>1</sup>H NMR (400 MHz, CDCl<sub>3</sub>): δ 4.89 (s, 1H), 4.67 (s, 1H), 3.84 (d, *J* = 6.1 Hz, 1H), 2.65 (m, 1H), 2.23 (ddd, *J* = 13.5, 6.9, 2.7 Hz, 1H), 1.94 (m, 1H), 1.77 (d, *J* = 10.1 Hz, 1H), 1.68 (*J* = 10.2 Hz, 1H), 1.55 (br. s, 1H), 1.20 (dt, *J* = 14.0, 2.8 Hz, 1H), 1.06 (s, 3H), 0.99 (s, 3H).

<sup>13</sup>C NMR (100 MHz, CDCl<sub>3</sub>): δ 161.18, 103.17, 74.07, 55.97, 47.72, 41.00, 36.92, 33.50, 29.34, 25.47.

IR: 2923, 2363, 1733, 1653, 1559, 1457, 1220, 1158, 1094, 772 cm<sup>-1</sup>.

Anal. calcd (%) for C<sub>10</sub>H<sub>16</sub>O: C, 78.90; H, 10.59; found: C: 78.63, H, 10.44.

### 32. Addition of triflamide **1a** to camphene **2** in the presence of NBS in PhCN.

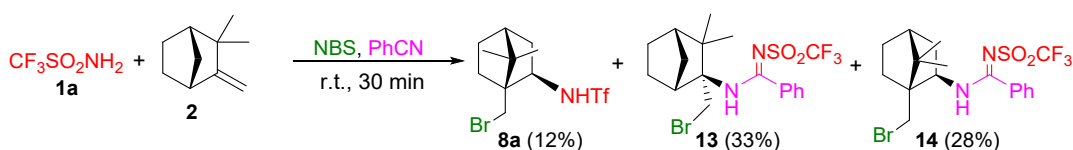

To 0.3 g (2.0 mmol) of triflamide **1a** dissolved in 15 ml of benzonitrile was added 0.27 g (2.0 mmol) of camphene **2**, then 0.43 g (1.2 equiv., 2.4 mmol) of NBS. The mixture was stirred for 30 min. Next, benzonitrile was removed in a vacuum distillation, the resulting residue was washed with 25 ml of diethyl ether, and after cooling, the succinimide was filtered off, and the solvent was distilled in a vacuum. The residue was purified on a silica gel column (80 g, eluents: hexane - ether 1:2, hexane - ether 1:4) to afford 0.09 g (12%) of product **8**, 0.31 g (33%) of product **13** and 0.26 g (28%) of product **14**.

*N*-(2-(Bromomethyl)-3,3-dimethylbicyclo[2.2.1]heptan-2-yl)-*N'*-(triflyl)benzimidamide (**13**).

White powder. M.p. 177°C

$^1\text{H}$  NMR (400 MHz,  $\text{CD}_3\text{CN}$ ):  $\delta$  7.60–7.55 (m, 5H, Ph), 7.16 (br.s, 1H, NH), 4.97 (d,  $J = 11.2$  Hz, 1H,  $\text{CH}^{\text{A}}\text{HBr}$ ), 3.82 (d,  $J = 11.2$  Hz, 1H,  $\text{CH}^{\text{B}}\text{HBr}$ ), 2.43–2.42 (m, 1H), 1.85–1.81 (m, 1H), 1.65–1.62 (m, 2H), 1.50–1.48 (m, 1H), 1.32 (s, 3H,  $\text{CH}_3$ ), 1.12 (s, 3H,  $\text{CH}_3$ ).

$^{13}\text{C}$  NMR (100 MHz,  $\text{CD}_3\text{CN}$ ):  $\delta$  169.02 (C=N), 132.60 ( $\text{C}^{\text{u}}$ ), 129.37 ( $\text{C}^{\text{p}}$ ), 129.33 ( $\text{C}^{\text{m}}$ ), 128.58 ( $\text{C}^{\text{o}}$ ), 60.74 (CNH), 52.26 ( $\text{CHCH}_2$ ), 51.98 ( $\text{CHCH}_2$ ), 49.40 ( $\text{C}(\text{CH}_3)_2$ ), 35.78 ( $\text{CH}(\text{CH}_3)$ ), 34.84 ( $\text{CH}_2$ ), 27.19 ( $\text{CH}_2$ ), 23.64 ( $\text{CH}_2$ ), 22.81 ( $\text{CH}_3$ ), 21.14 ( $\text{CH}_3$ ).

$^{19}\text{F}$  NMR (376 MHz,  $\text{CD}_3\text{CN}$ ):  $\delta$  –80.63

IR: 3319 (NH), 3064, 2962 (Ph), 2264, 1959, 1588, 1537 (C=N), 1446, 1337 ( $\text{SO}_2$ ), 1198 ( $\text{CF}_3$ ), 1122, 1080, 1031, 966, 928, 870, 779, 721, 670, 609, 596, 505  $\text{cm}^{-1}$ .

*N*-(1-(Bromomethyl)-7,7-dimethylbicyclo[2.2.1]heptan-2-yl)-*N'*-(triflyl)benzimidamide (**14**).

White powder. M.p. 181°C.

$^1\text{H}$  NMR (400 MHz,  $\text{CD}_3\text{CN}$ ):  $\delta$  7.59 – 7.47 (m, 5H, Ph), 7.40 (br.s, 1H, NH), 4.17 – 4.14 (m, 1H, CHN), 3.77 (d,  $J = 10.9$  Hz, 1H,  $\text{CH}^{\text{A}}\text{HBr}$ ), 3.56 (d,  $J = 10.9$  Hz, 1H,  $\text{CH}^{\text{B}}\text{HBr}$ ), 1.84 (m, 2H), 1.64 (m, 1H), 1.33 – 1.29 (m, 3H), 1.16 – 1.13 (m, 1H), 1.04 (s, 3H,  $\text{CH}_3$ ), 0.97 (s, 3H,  $\text{CH}_3$ ).

$^{13}\text{C}$  NMR (100 MHz,  $\text{CD}_3\text{CN}$ ):  $\delta$  168.83 (C=N), 132.88 ( $\text{C}^{\text{u}}$ ), 129.31 ( $\text{C}^{\text{p}}$ ), 129.10 ( $\text{C}^{\text{m}}$ ), 128.49 ( $\text{C}^{\text{o}}$ ), 60.70 (CHNH), 53.59 ( $\text{CCH}_2$ ), 48.60 ( $\text{C}(\text{CH}_3)_2$ ), 47.50 (CH), 39.43 ( $\text{CH}_2\text{Br}$ ), 35.55 ( $\text{CH}_2$ ), 35.42 ( $\text{CH}_2$ ), 27.07 ( $\text{CH}_2$ ), 20.78 ( $\text{CH}_3$ ), 20.63 ( $\text{CH}_3$ ).

$^{19}\text{F}$  NMR (376 MHz,  $\text{CD}_3\text{CN}$ ):  $\delta$  –80.57.

IR: 3336 (NH), 2959, 2925, 2853 (Ph), 1588, 1532 (C=N), 1446, 1394 ( $\text{SO}_2$ ), 1339, 1200 ( $\text{CF}_3$ ), 1123, 1080, 1031, 928, 872, 779, 732, 698, 662, 598, 502  $\text{cm}^{-1}$ .

Anal. calcd (%) for  $\text{C}_{18}\text{H}_{22}\text{BrF}_3\text{N}_2\text{O}_2\text{S}$ : C 46.26; H 4.75; Br 17.10; F 12.20; N 5.99; S 6.86. found: C 46.72; H 4.89; Br 16.87; F 12.05; N 6.04; S 6.93

### 33. Addition of triflamide **1a** to camphene **2** in the presence of NIS in PhCN.

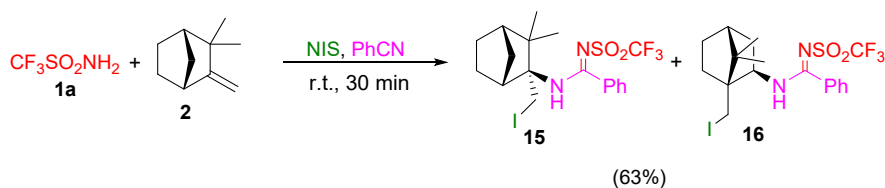

The interaction of triflamide (**1a**) with camphene (**2**) in the NIS + PhCN system was carried out similarly to the interaction in the NBS + PhCN system, triflamide (0.30 g, 2 mmol), camphene (0.27 g, 2 mmol), 15 ml of benzonitrile, 0.54 g (1.2 eq, 2.4 mmol) of

NIS were used in the reaction. The residue (~0.75 g) was placed on a silica gel column (0.063-0.2 mm, Acros Organics) and eluted with ether-hexane (2:1), ether-hexane (4:1) to give 0.65 g (63%) of a mixture of 2 isomers: N-(2-(iodomethyl)-7,7-dimethylbicyclo[2.2.1]heptan-2-yl)-N'-(triflyl)benzimidamide (**15**) and N-(1-(iodomethyl)-3,3-dimethylbicyclo[2.2.1]heptan-2-yl)-N'-(triflyl)benzimidamide (**16**) as a white powder.

*N*-(2-(iodomethyl)-3,3-dimethylbicyclo[2.2.1]heptan-2-yl)-*N'*-(triflyl)benzimidamide (**15**).

White powder. M.p. 192°C

<sup>1</sup>H NMR (400 MHz, CD<sub>3</sub>CN): δ 7.63–7.60 (m, 5H, Ph), 7.17 (br.s, 1H, NH), 4.86 (d, J = 11.0 Hz, 1H, CH<sup>H<sup>A</sup></sup>), 3.36 (d, J = 11.0 Hz, 1H, CH<sup>H<sup>B</sup></sup>), 2.39–2.38 (m, 1H), 1.77–1.75 (m, 1H), 1.69–1.66 (m, 2H), 1.62–1.58 (m, 2H), 1.46–1.42 (m, 2H), 1.35 (s, 3H, CH<sub>3</sub>), 1.16 (s, 3H, CH<sub>3</sub>).

<sup>13</sup>C NMR (100 MHz, CD<sub>3</sub>CN): 168.89 (C=N), 134.49 (C<sup>u</sup>), 132.52 (C<sup>p</sup>), 129.34 (C<sup>m</sup>), 128.58 (C<sup>o</sup>), 118.53 (q, J = 319.2 Hz, CF<sub>3</sub>), 70.98 (CNH), 52.91 (CH), 49.29 (C(CH<sub>3</sub>)<sub>2</sub>), 47.90 (CH), 34.56 (CH<sub>2</sub>), 27.64 (CH<sub>3</sub>), 23.23 (CH<sub>2</sub>), 22.68 (CH<sub>2</sub>), 21.60 (CH<sub>3</sub>), 9.12 (CH<sub>2</sub>l).

<sup>19</sup>F NMR (376 MHz, CD<sub>3</sub>CN): –80.46.

IR: 3317 (NH), 2963, 2888 (Ph), 1586, 1542 (C=N), 1492, 1465, 1446, 1413, 1380 (SO<sub>2</sub>), 1338, 1262, 1200 (CF<sub>3</sub>), 1154, 1121, 1090, 1031, 988, 957, 928, 895, 881, 864, 840, 808, 777, 717, 633, 609, 555, 503 cm<sup>-1</sup>.

*N*-(1-(iodomethyl)-7,7-dimethylbicyclo[2.2.1]heptan-2-yl)-*N'*-(triflyl)benzimidamide (**16**).

White powder. M.p. 188°C

<sup>1</sup>H NMR (400 MHz, CD<sub>3</sub>CN): δ 7.65–7.62 (m, 5H, Ph), 7.38 (br.s, 1H, NH), 4.04–4.02 (m, 1H, CHN), 3.67 (d, J = 10.5 Hz, 1H, CH<sup>H<sup>A</sup></sup>), 3.44 (d, J = 10.5 Hz, 1H, CH<sup>H<sup>A</sup></sup>), 2.11 (m, 2H), 1.66–1.63 (m, 1H), 1.48–1.43 (m, 1H), 1.27–1.22 (m, 1H), 1.01 (s, 3H, CH<sub>3</sub>), 0.94 (s, 3H, CH<sub>3</sub>).

<sup>13</sup>C NMR (100 MHz, CD<sub>3</sub>CN): 169.11 (C=N), 134.47 (C<sup>u</sup>), 132.77 (C<sup>p</sup>), 129.28 (C<sup>m</sup>), 128.48 (C<sup>o</sup>), 118.36 (q, J = 318.8 Hz, CF<sub>3</sub>), 61.92 (CHNH), 52.47 (CCH<sub>2</sub>l), 50.96 (CH(CH<sub>2</sub>)<sub>2</sub>), 49.26 (CH<sub>2</sub>), 37.38 (CH<sub>2</sub>(CH<sub>3</sub>)<sub>2</sub>), 34.53 (CH<sub>2</sub>), 23.20 (CH<sub>2</sub>), 20.74 (CH<sub>3</sub>), 20.61 (CH<sub>3</sub>), 12.70 (CH<sub>2</sub>l).

<sup>19</sup>F NMR (376 MHz, CD<sub>3</sub>CN): –80.40.

IR: 3315 (NH), 2961, 2886 (Ph), 1586, 1538 (C=N), 1492, 1471, 1446, 1413, 1390 (SO<sub>2</sub>), 1338, 1262, 1191 (CF<sub>3</sub>), 1154, 1121, 1080, 1031, 984, 957, 928, 895, 881, 864, 840, 808, 777, 735, 717, 669, 609, 570, 507 cm<sup>-1</sup>.

Anal. calcd (%) for C<sub>18</sub>H<sub>22</sub>F<sub>3</sub>IN<sub>2</sub>O<sub>2</sub>S: C 42.03; H 4.31; F 11.08; I 24.67; N 5.45; S 6.23, found: C 42.25; H 4.34; F 11.00; I 24.42; N 5.60; S 6.35.

#### 34. Heterocyclization of amidine **5a** in the presence CsF in MeCN.

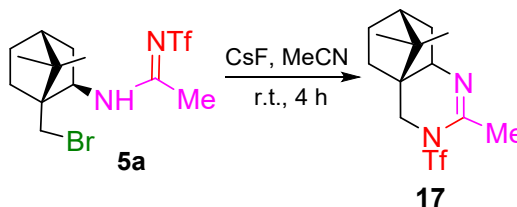

*2,9,9-Trimethyl-3-(trifluoromethylsulfonyl)-3,5,6,7,8,8a-hexahydro-4H-4a,7-methanoquinazoline (17)*. 100 mg (0.25 mmol) of **5a** was dissolved in 5 ml of MeCN and CsF (113 mg, 0.75 mmol) was added. The mixture was stirred for 30 min. Next, acetonitrile was removed in vacuum to afford 64 mg (80%) of product **17**.

Colorless oil. <sup>1</sup>H NMR (400 MHz, CDCl<sub>3</sub>): δ 3.83 (d, *J* = 13.0 Hz, 1H), 3.62 (d, *J* = 12.8 Hz, 1H) 3.25 (ddd, *J* = 9.1, 5.6, 2.5 Hz 1H), 2.30 (d, *J* = 2.4 Hz, 3H), 1.92 (m, 2H), 1.80 (m, 2H), 1.68 – 1.60 (m, 1H), 1.22 (m, 2H), 0.94 (s, 3H), 0.93 (s, 3H).

<sup>13</sup>C NMR (100 MHz, CDCl<sub>3</sub>): δ 144.98, 119.95 (q, *J* = 323.5 Hz), 62.47, 47.71, 46.85, 46.52, 46.12, 37.93, 33.52, 26.64, 24.31, 20.93, 19.49.

<sup>19</sup>F NMR (376 MHz, CDCl<sub>3</sub>): δ -75.18.

IR: 3980, 3350, 3113, 2961, 1539, 1444, 1373, 1323, 1188, 1057, 939, 880, 837, 777, 602, 505 cm<sup>-1</sup>.

HRMS (ESI): *m/z* calcd for C<sub>13</sub>H<sub>20</sub>F<sub>3</sub>N<sub>2</sub>O<sub>2</sub>S<sup>+</sup>: 325.1198 (M+H<sup>+</sup>); found: 325.1204.

1. L. Garamszegi, M. Schlosser, Halogen/Metal vs. Hydrogen/Metal Exchange: General or Specific Site Selectivity as Exemplified in the Camphene Series. *Chem. Ber.* 1997, **130**, 77-82.
2. J. D. Roberts, E. R. Trumbull, The Reaction of N-Bromosuccinimide with Camphene and α-Pinene. *J. Am. Chem. Soc.*, 1949, **71**, 1630-1632.
3. I. A. Garagan, M. Y. Moskalik, I. V. Sterkhova, A. S. Ganin, *Molbank*, 2023, M1645.
4. Z. Dağalan, R. Koçak, A. Daştan, B. Nişancı, Selectfluor and TBAX (Cl, Br) Mediated Oxidative Chlorination and Bromination of Olefins, *Org. Lett.*, 2022, **24**, 8261-8264.
5. N. Darby, N. Lamb, T. Money, Synthesis and absolute configuration of nojigiku alcohol, *Can. J. Chem.*, 1979, **57**, 742-746.



**Table S1.** Crystal data, details of intensity measurements, and structure refinement for compound **3a**

|                                                 |                                                                                 |
|-------------------------------------------------|---------------------------------------------------------------------------------|
| Empirical formula                               | C <sub>13</sub> H <sub>20</sub> IF <sub>3</sub> N <sub>2</sub> O <sub>2</sub> S |
| Formula weight / g·mol <sup>-1</sup>            | 452.27                                                                          |
| Crystal system                                  | monoclinic                                                                      |
| Space group                                     | C 2/c                                                                           |
| <i>a</i> / Å                                    | 32.242(4)                                                                       |
| <i>b</i> / Å                                    | 7.985(1)                                                                        |
| <i>c</i> / Å                                    | 13.549(2)                                                                       |
| $\alpha, \beta, \gamma$ / °                     | 90, 98.260(4), 90                                                               |
| Volume / Å <sup>3</sup>                         | 3451.9(7)                                                                       |
| <i>Z</i>                                        | 8                                                                               |
| Density (calculated) / g·cm <sup>-3</sup>       | 1.741                                                                           |
| Absorptions coefficient / mm <sup>-1</sup>      | 2.012                                                                           |
| Radiation ( $\lambda$ / Å)                      | MoK $\alpha$ (0.71073)                                                          |
| Temperature / K                                 | 293(2)                                                                          |
| 2 $\theta$ range / °                            | 5.01 – 60.60                                                                    |
| Crystal size / mm                               | 0.10 × 0.38 × 0.50                                                              |
| Crystal habit                                   | colorless plate                                                                 |
| F(000)                                          | 1792                                                                            |
| Index ranges                                    | -45 ≤ <i>h</i> ≤ 45, -11 ≤ <i>k</i> ≤ 11, -18 ≤ <i>l</i> ≤ 19                   |
| Reflections collected                           | 72361                                                                           |
| Independent reflections                         | 5163                                                                            |
| Max. and min. transmission                      | 0.5407 / 0.7460                                                                 |
| Number of ref. parameters                       | 202                                                                             |
| $R_1$ / $wR_2$ [ $I > 2\sigma(I)$ ]             | 0.0351 / 0.0794                                                                 |
| $R_1$ / $wR_2$ (all data)                       | 0.0891 / 0.0884                                                                 |
| Goodness-of-fit on $F^2$                        | 1.056                                                                           |
| Largest diff. peak and hole / e·Å <sup>-3</sup> | 1.384 / -1.232                                                                  |



|               |                                                                                   |
|---------------|-----------------------------------------------------------------------------------|
| Weight scheme | $w=1/[\sigma^2(F_o^2) + (0.0411 P)^2 + 1.4451 P]$<br>where $P=(F_o^2 + 2F_c^2)/3$ |
|---------------|-----------------------------------------------------------------------------------|

**Table S2.** Bond lengths, bond and torsion angles in compound **3a**

| Bond   | <i>l</i> , Å | Angle     | $\varphi$ , ° | Torsion angle | $\theta$ , ° |
|--------|--------------|-----------|---------------|---------------|--------------|
| I1-C7  | 2.170(2)     | O1-S1-O2  | 117.2(1)      | O1-S1-N1-C2   | 9.5(3)       |
| S1-O1  | 1.432(2)     | O1-S1-N1  | 118.7 (1)     | O2-S1-N1-C2   | 146.4(2)     |
| S1-O2  | 1.432(2)     | O2-S1-N1  | 108.4(1)      | C1-S1-N1-C2   | -104.1(2)    |
| S1-N1  | 1.572(2)     | O1-S1-C1  | 104.4(1)      | O1-S1-C1-F1   | -58.8(2)     |
| S1-C1  | 1.835(3)     | O2-S1-C1  | 104.3(1)      | O2-S1-C1-F1   | 177.7(2)     |
| F1-C1  | 1.315(3)     | N1-S1-C1  | 101.6(1)      | N1-S1-C1-F1   | 65.1(2)      |
| F2-C1  | 1.323(3)     | C2-N1-S1  | 126.4(2)      | O1-S1-C1-F2   | -180.0(2)    |
| N1-C2  | 1.329(3)     | C2-N2-C3  | 129.4(2)      | O2-S1-C1-F2   | 56.5(2)      |
| N2-C2  | 1.311(3)     | F1-C1-F2  | 108.7(2)      | N1-S1-C1-F2   | -56.1(2)     |
| N2-C3  | 1.488(3)     | F1-C1-S1  | 110.4(2)      | O1-S1-C1-F3   | 60.2(2)      |
| C2-C13 | 1.507(3)     | N2-C2-N1  | 118.5(2)      | O2-S1-C1-F3   | -63.3(2)     |
| C3-C7  | 1.523(3)     | N2-C2-C13 | 116.2(2)      | N1-S1-C1-F3   | -175.9(2)    |
| C3-C10 | 1.559(3)     | N1-C2-C13 | 125.3(2)      | C3-N2-C2-N1   | -0.7(3)      |
| C3-C4  | 1.618(3)     | N2-C3-C7  | 109.6(2)      | C3-N2-C2-C13  | 179.1(2)     |
| C4-C5  | 1.557(4)     | C3-C7-I1  | 112.8(2)      | N2-C3-C7-I1   | 60.7(2)      |
| C5-C6  | 1.538(4)     | C7-C3-C10 | 113.9(2)      | S1-N1-C2-C13  | -0.2(4)      |
| C6-C9  | 1.543(4)     | C7-C3-C4  | 112.7(2)      | C2-N2-C3-C7   | 51.4(3)      |

Molecules of compound **3a** crystallize in monoclinic space group C 2/c. There are one molecule in the asymmetric unit. The geometry of triflimidamide fragment is near to geometry of that in other similar structures [2-4]. In molecule of compound **3a** formally double bond N1-C4 (1.329(3)Å) is longer than the ordinary bond C4-N2 (1.311(3)Å). This is the result of very strong conjugation in the triad NH-C=NTf due to strong electron-withdrawing effect of the triflyl group, as in the earlier studied by us compounds.<sup>2-4</sup>

In the crystal molecules of **3a** connected by intermolecular hydrogen bonds NH...O=S by lengths 2.180 Å (Figure S2).



|                                                              |                                                                                   |
|--------------------------------------------------------------|-----------------------------------------------------------------------------------|
| $b / \text{\AA}$                                             | 12.379(4)                                                                         |
| $c / \text{\AA}$                                             | 13.802(4)                                                                         |
| $\alpha, \beta, \gamma / ^\circ$                             | 90, 105.009(13), 90                                                               |
| Volume / $\text{\AA}^3$                                      | 1688.8(10)                                                                        |
| $Z$                                                          | 4                                                                                 |
| Density (calculated) / $\text{g}\cdot\text{cm}^{-3}$         | 1.594                                                                             |
| Absorptions coefficient / $\text{mm}^{-1}$                   | 2.594                                                                             |
| Radiation ( $\lambda / \text{\AA}$ )                         | MoK $\alpha$ (0.71073)                                                            |
| Temperature / K                                              | 293(2)                                                                            |
| $2\theta$ range / $^\circ$                                   | 4.49 – 60.64                                                                      |
| Crystal size / mm                                            | 0.12 $\times$ 0.32 $\times$ 0.40                                                  |
| Crystal habit                                                | colorless plate                                                                   |
| F(000)                                                       | 824                                                                               |
| Index ranges                                                 | $-14 \leq h \leq 14, -17 \leq k \leq 17, -19 \leq l \leq 19$                      |
| Reflections collected                                        | 60138                                                                             |
| Independent reflections                                      | 5035                                                                              |
| Max. and min. transmission                                   | 0.4649 / 0.7460                                                                   |
| Number of ref. parameters                                    | 202                                                                               |
| $R_1 / wR_2$ [ $I > 2\sigma(I)$ ]                            | 0.0929 / 0.2417                                                                   |
| $R_1 / wR_2$ (all data)                                      | 0.1864 / 0.2728                                                                   |
| Goodness-of-fit on $F^2$                                     | 1.058                                                                             |
| Largest diff. peak and hole / $\text{e}\cdot\text{\AA}^{-3}$ | 1.185 / -0.819                                                                    |
| Weight scheme                                                | $w=1/[\sigma^2(F_o^2) + (0.1339 P)^2 + 1.6510 P]$<br>where $P=(F_o^2 + 2F_c^2)/3$ |

**Table S4.** Bond lengths, bond and torsion angles in compound **5a**

| Bond    | $l, \text{\AA}$ | Angle    | $\varphi, ^\circ$ | Torsion angle | $\theta, ^\circ$ |
|---------|-----------------|----------|-------------------|---------------|------------------|
| Br1-C12 | 1.969(6)        | O1-S1-O2 | 117.7(3)          | O1-S1-N2-C5   | 1.9(6)           |
| S1-O1   | 1.421(4)        | O1-S1-N2 | 119.1(2)          | O2-S1-N2-C5   | 141.2(4)         |
| S1-O2   | 1.425(4)        | O2-S1-N2 | 109.3(2)          | C6-S1-N2-C5   | -109.9(5)        |
| S1-N2   | 1.576(4)        | O1-S1-C6 | 103.7(3)          | C11-C2-C3-C12 | -60.8(6)         |
| S1-C6   | 1.832(6)        | O2-S1-C6 | 104.2(3)          | C1-C2-C3-C12  | 63.7(6)          |
| F1-C6   | 1.327(8)        | N2-S1-C6 | 99.8(3)           | C8-C2-C3-C12  | -178.5(4)        |

|        |          |                |          |                    |           |
|--------|----------|----------------|----------|--------------------|-----------|
| F2-C6  | 1.325(7) | C5-N1-C4       | 122.7(4) | C11-C2-C3-C10      | 63.0(6)   |
| F3-C6  | 1.306(7) | C5-N2-S1       | 126.2(3) | C1-C2-C3-C10       | -172.5(5) |
| N1-C5  | 1.316(6) | N1-C4-C3       | 114.8(4) | C8-C2-C3-C10       | -54.6(4)  |
| N1-C4  | 1.470(6) | N1-C4-C7       | 114.1(4) | C11-C2-C3-C4       | 170.5(5)  |
| N2-C5  | 1.323(6) | N1-C5-N2       | 116.0(4) | C1-C2-C3-C4        | -65.0(6)  |
| C1-C2  | 1.541(7) | N1-C5-C13      | 117.0(4) | C2-C3-C4-N1        | 93.4(5)   |
| C2-C3  | 1.561(7) | N2-C5-C13      | 127.0(4) | C10-C3-C4-N1       | -161.0(4) |
| C3-C4  | 1.556(6) | F1-C6-S1       | 110.9(4) | S1-N2-C5-N1        | 172.0(4)  |
| C3-C10 | 1.549(7) | F2-C6-S1       | 110.7(5) | C10-C3-C12-<br>Br1 | 66.8(5)   |
| C2-C8  | 1.553(8) | C4-C7-C8       | 103.6(4) | C4-C3-C12-Br1      | -54.9(5)  |
| C8-C9  | 1.536(9) | C3-C12-<br>Br1 | 112.3(3) | C2-C3-C12-Br1      | -176.3(3) |

Molecules of compound **5a** crystallize in monoclinic space group  $P2_1/c$ . The geometry of triflimidamide fragment is near to geometry of that in other similar structures.<sup>2-4</sup> In molecule of compound **3a** formally double bond N1-C4 (1.323(2)Å) is longer than the ordinary bond C4-N2 (1.316(2)Å). This is the result of very strong conjugation in the triad NH-C=NTf due to strong electron-withdrawing effect of the triflyl group, as in the earlier studied by us compounds.<sup>2-4</sup>

In the crystal molecules of **5a** connected by intermolecular hydrogen bonds NH $\cdots$ O=S by lengths 2.215 Å (Figure S4).

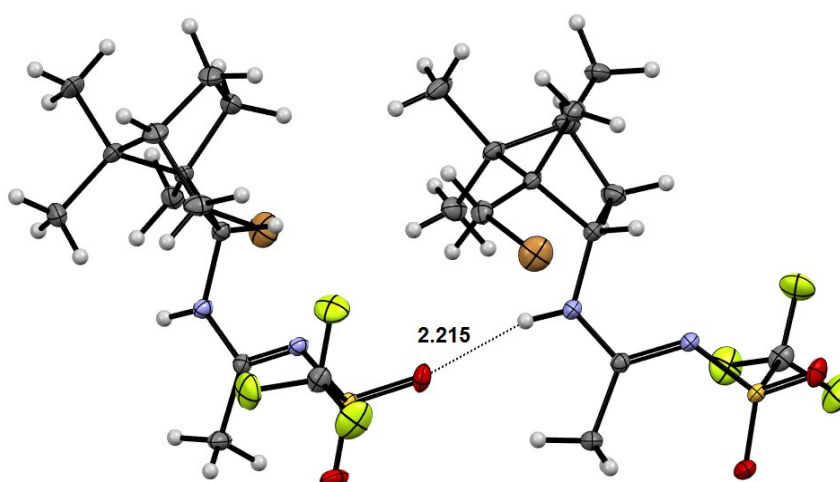

**Figure S4.** Hydrogen bonds NH $\cdots$ O=S in the crystal of **5a**



|                                                         |                                                                                    |
|---------------------------------------------------------|------------------------------------------------------------------------------------|
| Crystal size / mm                                       | 0.04 × 0.24 × 0.35                                                                 |
| Crystal habit                                           | colorless plate                                                                    |
| F(000)                                                  | 724                                                                                |
| Index ranges                                            | -11 ≤ h ≤ 11, -20 ≤ k ≤ 22, -17 ≤ l ≤ 14                                           |
| Reflections collected                                   | 24712                                                                              |
| Independent reflections                                 | 4684                                                                               |
| Max. and min. transmission                              | 0.7460 / 0.5861                                                                    |
| Number of ref. parameters                               | 180                                                                                |
| $R_1 / wR_2$ [ $I > 2\sigma(I)$ ]                       | 0.0839 / 0.1712                                                                    |
| $R_1 / wR_2$ (all data)                                 | 0.2170 / 0.2111                                                                    |
| Goodness-of-fit on $F^2$                                | 1.010                                                                              |
| Largest diff. peak and hole / $e \cdot \text{\AA}^{-3}$ | 1.278 / -0.650                                                                     |
| Weight scheme                                           | $w=1/[\sigma^2(F_o^2) + (0.0889 P)^2 + 0.9183P]$ ,<br>where $P=(F_o^2 + 2F_c^2)/3$ |

**Table S6.** Selected bond lengths, bond and torsion angles in compound **7k**

| Bond   | $l$ , $\text{\AA}$ | Angle     | $\varphi$ , $^\circ$ | Torsion angle | $\theta$ , $^\circ$ |
|--------|--------------------|-----------|----------------------|---------------|---------------------|
| Br1-C8 | 1.966(6)           | O2-S1-O1  | 115.6(2)             | O2-S1-N2-C5   | 78.5(4)             |
| S1-O2  | 1.447(4)           | O2-S1-N2  | 111.2(2)             | O1-S1-N2-C5   | -53.5(5)            |
| S1-O1  | 1.450(4)           | O1-S1-N2  | 113.1(2)             | C6-S1-N2-C5   | -168.1(4)           |
| S1-N2  | 1.603(4)           | O2-S1-C6  | 107.8(3)             | C9-C1-C2-C11  | 35.1(6)             |
| S1-C6  | 1.760(5)           | O1-S1-C6  | 108.2(3)             | C9-C1-C2-C3   | -72.4(6)            |
| N1-C5  | 1.324(6)           | N2-S1-C6  | 99.6(2)              | C11-C2-C3-C12 | 82.3(5)             |
| N1-C4  | 1.503(6)           | C5-N1-C4  | 127.7(4)             | C1-C2-C3-C13  | -53.4(6)            |
| N2-C5  | 1.317(6)           | C5-N2-S1  | 123.3(3)             | S1-N2-C5-N1   | -177.1(3)           |
| C1-C2  | 1.546(8)           | C2-C1-C9  | 103.8(4)             | S1-N2-C5-C7   | 2.4(7)              |
| C1-C9  | 1.556(9)           | C11-C2-C1 | 101.0(5)             | C4-N1-C5-N2   | -5.9(7)             |
| C2-C3  | 1.561(8)           | C11-C2-C3 | 101.8(4)             | C4-N1-C5-C7   | 174.6(4)            |
| C3-C4  | 1.609(7)           | C1-C2-C3  | 111.3(5)             | N1-C4-C8-Br1  | -56.9(5)            |
| C4-C8  | 1.528(7)           | N1-C4-C8  | 108.5(4)             | C3-C4-C8-Br1  | 177.7(3)            |
| C5-C7  | 1.514(7)           | N2-C5-N1  | 120.0(4)             | N1-C4-C10-C11 | -83.0(4)            |

Molecules of compound **7k** crystallize in monoclinic space group  $P2_1/n$ . There are four molecules in the unit cell and one molecule in the asymmetric unit. In the crystal

molecules of **7k** connected by intermolecular hydrogen bonds  $\text{NH}\cdots\text{O}=\text{S}$  by lengths 2.098 Å (Figure S6).

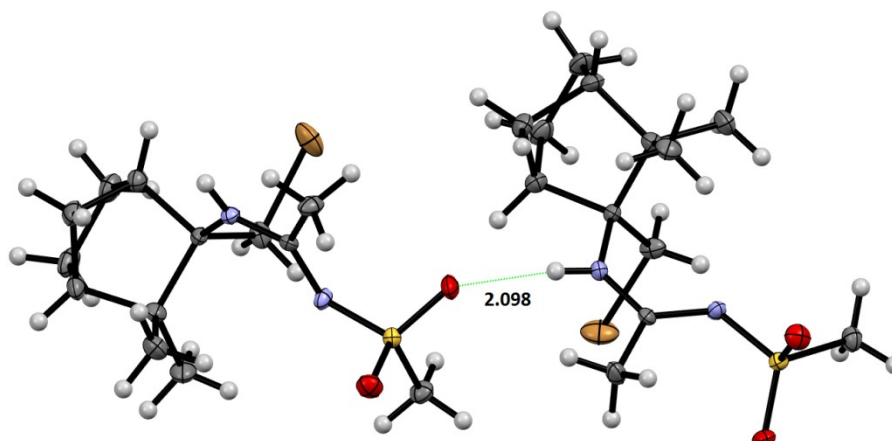

**Figure S6.** Hydrogen bonds  $\text{NH}\cdots\text{O}=\text{S}$  in the crystal of **7k**

The single crystals of **8a** were obtained by re-crystallization from chloroform solution. In order to investigate the molecular structure and intermolecular interactions in the solid state, X-ray structure analysis of the single crystal of compound **8a** was carried out. The molecular structure is depicted in Figure S7. Crystal data, data collection and structure refinement details are summarized in Table S7.

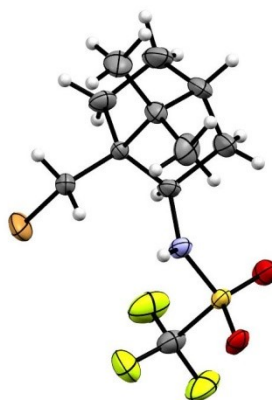

**Figure S7.** Molecular structure of compound **8a**

**Table S7.** Crystal data, details of intensity measurements, and structure refinement for compound **8a**

|                   |                                                             |
|-------------------|-------------------------------------------------------------|
| CCDC number       | 2306786                                                     |
| Empirical formula | $\text{C}_{11}\text{H}_{17}\text{BrF}_3\text{NO}_2\text{S}$ |
| Formula weight    | 364.22                                                      |
| Temperature, K    | 150(2)                                                      |

|                                          |                                                               |
|------------------------------------------|---------------------------------------------------------------|
| CCDC number                              | 2306786                                                       |
| Crystal system                           | triclinic                                                     |
| Space group                              | P-1                                                           |
| a, Å                                     | 7.6458(8)                                                     |
| b, Å                                     | 8.4634(10)                                                    |
| c, Å                                     | 11.3756(8)                                                    |
| $\alpha$ , °                             | 75.804(8)                                                     |
| $\beta$ , °                              | 81.317(7)                                                     |
| $\gamma$ , °                             | 85.101(9)                                                     |
| Volume, Å <sup>3</sup>                   | 704.55(13)                                                    |
| Z                                        | 2                                                             |
| $\rho_{\text{calc}}$ , g/cm <sup>3</sup> | 1.717                                                         |
| $\mu$ , mm <sup>-1</sup>                 | 3.096                                                         |
| F(000)                                   | 368.0                                                         |
| Crystal size, mm <sup>3</sup>            | 0.2 × 0.17 × 0.15                                             |
| Radiation                                | Mo K $\alpha$<br>( $\lambda$ = 0.71073)                       |
| 2 $\theta$ range for data collection, °  | 4.97 to 51.994                                                |
| Index ranges                             | -9 ≤ h ≤ 9,<br>-10 ≤ k ≤ 10,<br>-14 ≤ l ≤ 14                  |
| Reflections collected                    | 6375                                                          |
| Independent reflections                  | 2717 [R <sub>int</sub> = 0.0437, R <sub>sigma</sub> = 0.0598] |
| Data/restraints/parameters               | 2717/0/174                                                    |
| Goodness-of-fit on F <sup>2</sup>        | 0.974                                                         |
| Final R indexes [ $I \geq 2\sigma(I)$ ]  | R <sub>1</sub> = 0.0426, wR <sub>2</sub> = 0.0971             |

The single crystals of **8k** were obtained by re-crystallization from diethyl ether-hexane solution. In order to investigate the molecular structure and intermolecular interactions in the solid state, X-ray structure analysis of the single crystal of compound **8k** was carried out. The molecular structure is depicted in Figure S8. Crystal data, data collection and structure refinement details are summarized in



Table S8. Principal bond distances, bond angles and torsion angles are presented in Table S9.

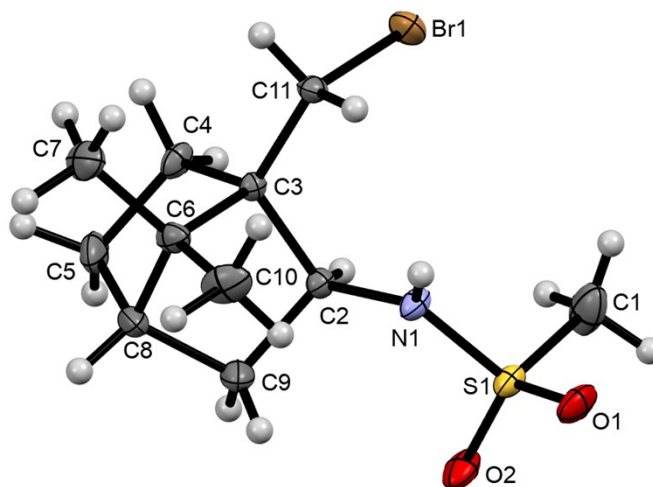

**Figure S8.** Molecular structure of compound **8k** (ORTEP, 20% probability ellipsoids).

**Table S8.** Crystal data, details of intensity measurements, and structure refinement for compound **8k**

|                                            |                                                     |
|--------------------------------------------|-----------------------------------------------------|
| Empirical formula                          | C <sub>11</sub> H <sub>20</sub> BrNO <sub>2</sub> S |
| Formula weight / g·mol <sup>-1</sup>       | 310.25                                              |
| Crystal system                             | triclinic                                           |
| Space group                                | P-1                                                 |
| <i>a</i> / Å                               | 7.546(4)                                            |
| <i>b</i> / Å                               | 8.634(4)                                            |
| <i>c</i> / Å                               | 10.975(5)                                           |
| $\alpha, \beta, \gamma$ / °                | 75.459(14), 80.375(16), 83.214(15)                  |
| Volume / Å <sup>3</sup>                    | 680.2(5)                                            |
| <i>Z</i>                                   | 2                                                   |
| Density (calculated) / g·cm <sup>-3</sup>  | 1.515                                               |
| Absorptions coefficient / mm <sup>-1</sup> | 3.163                                               |
| Radiation ( $\lambda$ / Å)                 | MoK $\alpha$ (0.71073)                              |
| Temperature / K                            | 293(2)                                              |
| 2 $\theta$ range / °                       | 3.68 – 60.36                                        |
| Crystal size / mm                          | 0.05 × 0.35 × 0.42                                  |
| Crystal habit                              | yellow plate                                        |
| F(000)                                     | 320                                                 |

|                                                         |                                                                                    |
|---------------------------------------------------------|------------------------------------------------------------------------------------|
| Index ranges                                            | -10 ≤ h ≤ 10, -12 ≤ k ≤ 12, -15 ≤ l ≤ 15                                           |
| Reflections collected                                   | 20988                                                                              |
| Independent reflections                                 | 3982                                                                               |
| Max. and min. transmission                              | 0.7460 / 0.3260                                                                    |
| Number of ref. parameters                               | 148                                                                                |
| $R_1 / wR_2$ [ $I > 2\sigma(I)$ ]                       | 0.0775 / 0.1720                                                                    |
| $R_1 / wR_2$ (all data)                                 | 0.1647 / 0.1989                                                                    |
| Goodness-of-fit on $F^2$                                | 1.034                                                                              |
| Largest diff. peak and hole / $e \cdot \text{\AA}^{-3}$ | 0.526 / -0.870                                                                     |
| Weight scheme                                           | $w=1/[\sigma^2(F_o^2) + (0.0742 P)^2 + 1.1921P]$ ,<br>where $P=(F_o^2 + 2F_c^2)/3$ |

**Table S9.** Selected bond lengths, bond and torsion angles in compound **8k**

| Bond    | $l$ , $\text{\AA}$ | Angle          | $\varphi$ , $^\circ$ | Torsion angle | $\theta$ , $^\circ$ |
|---------|--------------------|----------------|----------------------|---------------|---------------------|
| Br1-C11 | 1.966(5)           | O2-S1-O1       | 118.1(3)             | O2-S1-N1-C2   | -39.1(5)            |
| S1-O2   | 1.428(4)           | O2-S1-N1       | 108.1(2)             | O1-S1-N1-C2   | -167.2(4)           |
| S1-O1   | 1.441(4)           | O1-S1-N1       | 106.9(2)             | C1-S1-N1-C2   | 78.5(5)             |
| S1-N1   | 1.613(4)           | O2-S1-C1       | 108.8(4)             | S1-N1-C2-C3   | -165.5(3)           |
| S1-C1   | 1.759(7)           | O1-S1-C1       | 106.5(4)             | S1-N1-C2-C9   | 79.0(5)             |
| N1-C2   | 1.463(6)           | N1-S1-C1       | 108.2(3)             | N1-C2-C3-C11  | 39.4(6)             |
| C2-C3   | 1.554(6)           | C2-N1-S1       | 121.4(3)             | C9-C2-C3-C11  | 161.2(4)            |
| C2-C9   | 1.557(7)           | N1-C2-C3       | 113.8(4)             | N1-C2-C3-C4   | 165.3(4)            |
| C3-C11  | 1.512(6)           | N1-C2-C9       | 112.8(4)             | C9-C2-C3-C4   | -73.0(5)            |
| C3-C4   | 1.557(6)           | C3-C2-C9       | 101.9(4)             | N1-C2-C3-C6   | -88.6(5)            |
| C3-C6   | 1.575(7)           | C11-C3-C2      | 117.5(4)             | C9-C2-C3-C6   | 33.2(5)             |
| C4-C5   | 1.550(8)           | C11-C3-C4      | 112.7(4)             | C11-C3-C4-C5  | -157.8(4)           |
| C5-C8   | 1.531(10)          | C2-C3-C4       | 104.7(4)             | C2-C3-C4-C5   | 73.5(5)             |
| C6-C7   | 1.534(8)           | C3-C11-<br>Br1 | 112.4(3)             | C4-C3-C11-Br1 | -62.8(5)            |

Molecules of compound **8k** crystallize in triclinic space group P-1. There are two molecules in the unit cell and one molecule in the asymmetric unit. In the crystal molecules of **8k** connected by intermolecular hydrogen bonds  $\text{NH} \cdots \text{O}=\text{S}$  by lengths 2.333  $\text{\AA}$  (Figure S9).

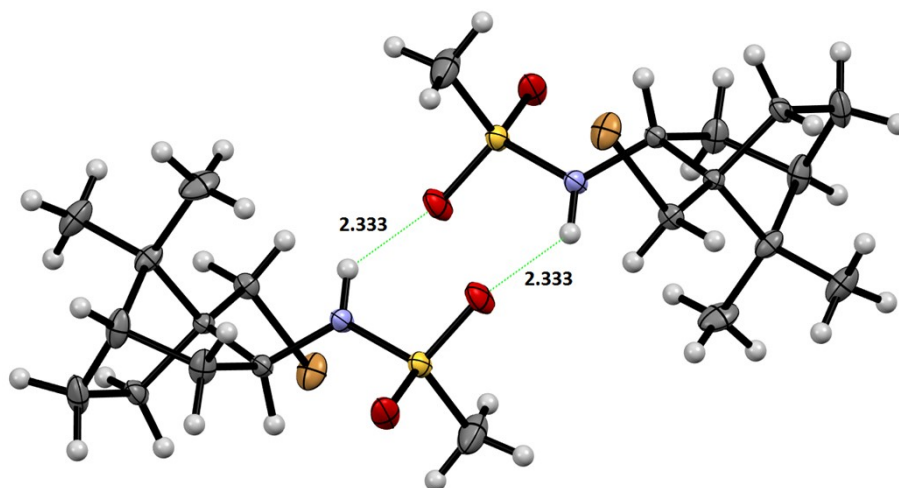

**Figure S9.** Hydrogen bonds  $\text{NH}\cdots\text{O}=\text{S}$  in the crystal of **8k**

References:

1. G.M. Sheldrick, *Acta Crystallogr*, **2008**, D64, 112.
2. Shainyan B. A., Meshcheryakov V. I., Sterkhova I. V., *Tetrahedron* **2015**, 71, 7906.
3. Moskalik M. Yu., Shainyan B. A., Ushakov I. A., Sterkhova I. V., Astakhova V. V., *Tetrahedron* **2020**, 76,131018.
4. Moskalik M. Yu., Garagan I. A., Astakhova V. V., Sterkhova I. V., Shainyan B. A., *Tetrahedron* 88 (2021) 132145.



Figure S11.  $^{13}\text{C}$  NMR spectrum of compound **3a**

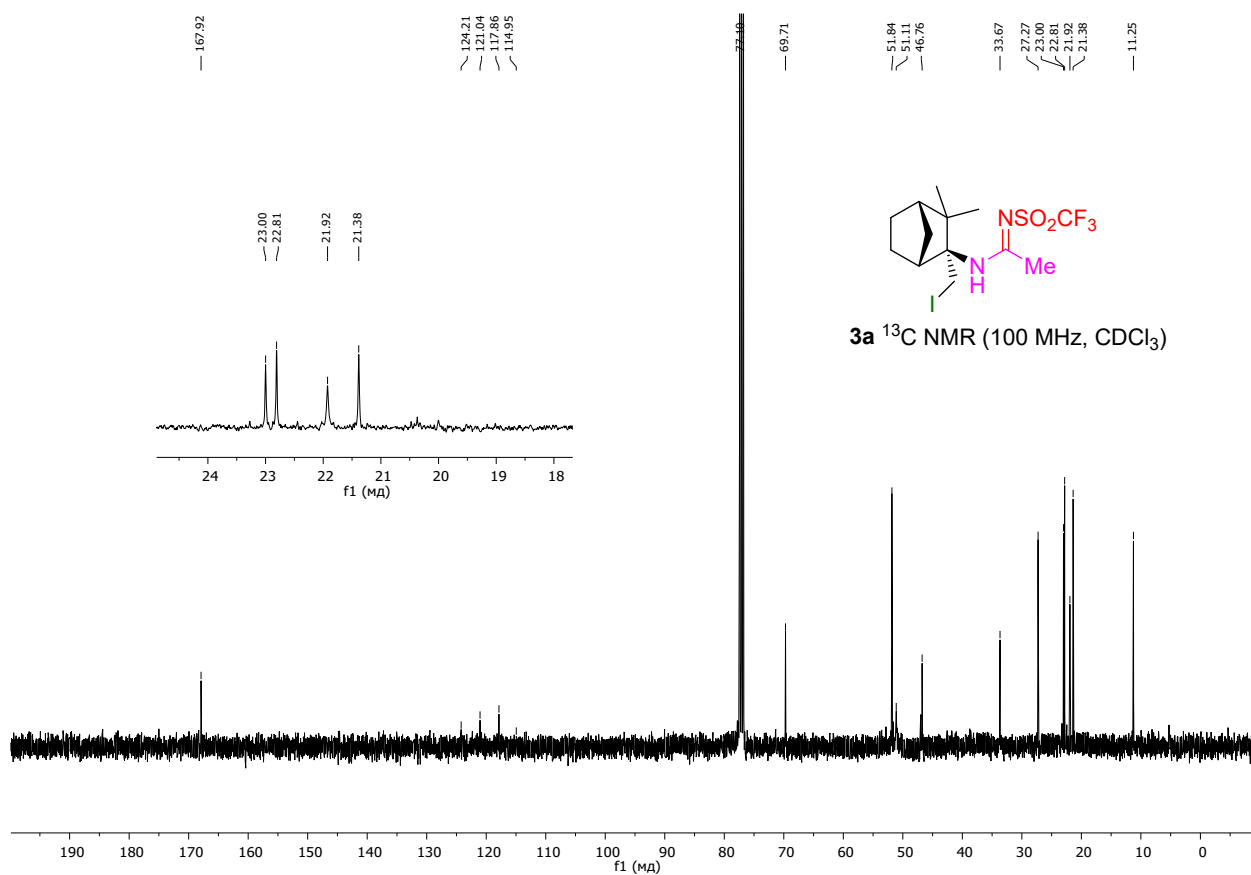

Figure S12.  $^{13}\text{C}$  NMR (*J-mod*) spectrum of compound **3a**

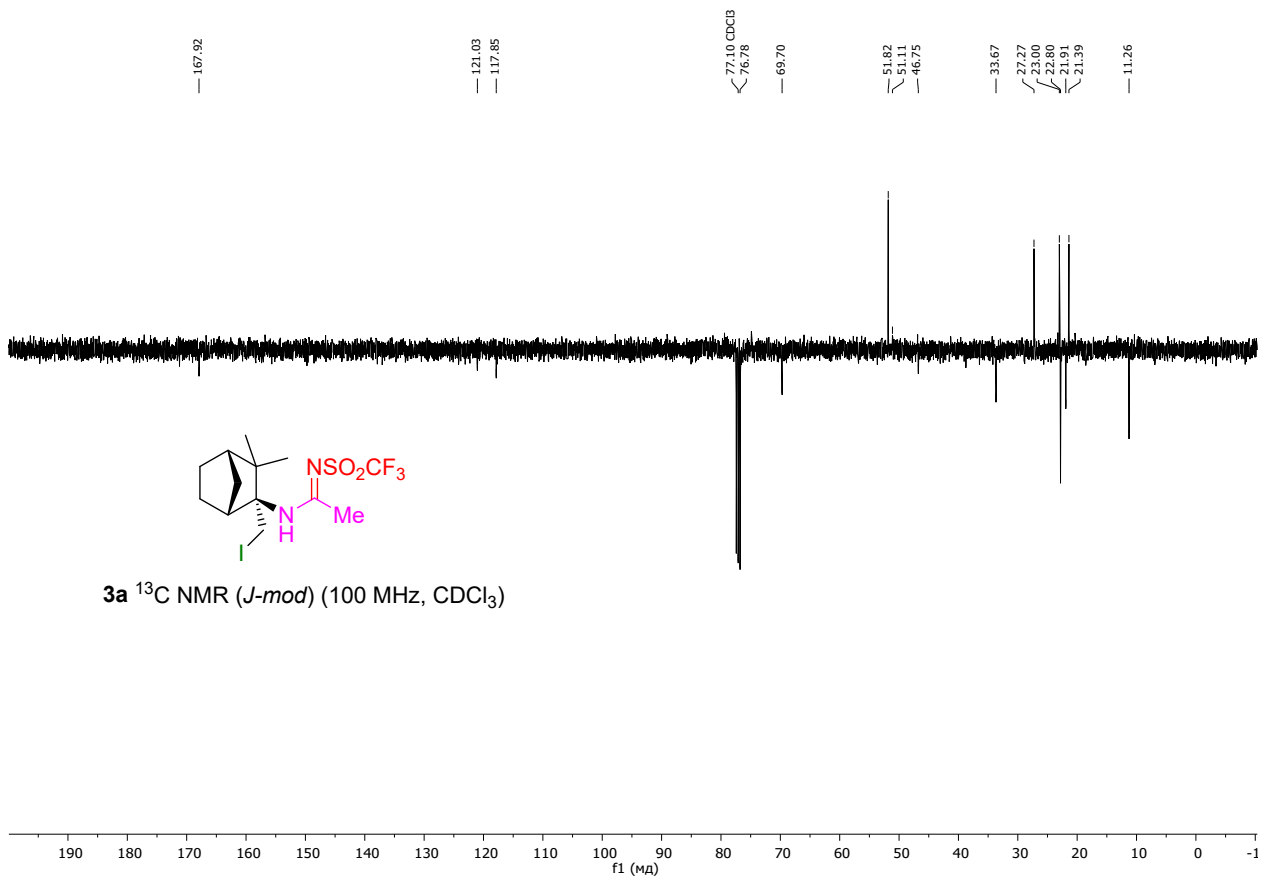

**Figure S13.**  $^{19}\text{F}$  NMR spectrum of compound **3a**

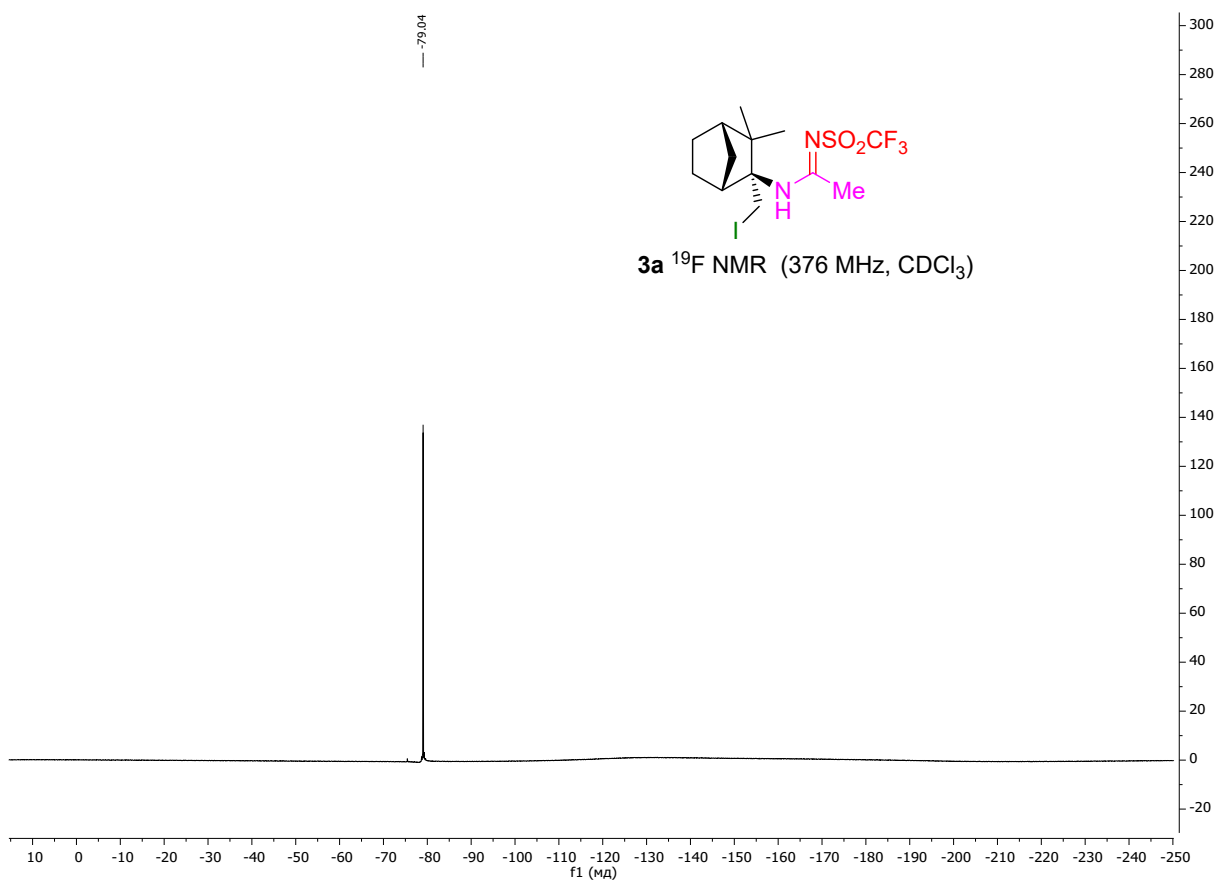

**Figure S14.**  $^1\text{H}$  NMR spectrum of compound **3b**

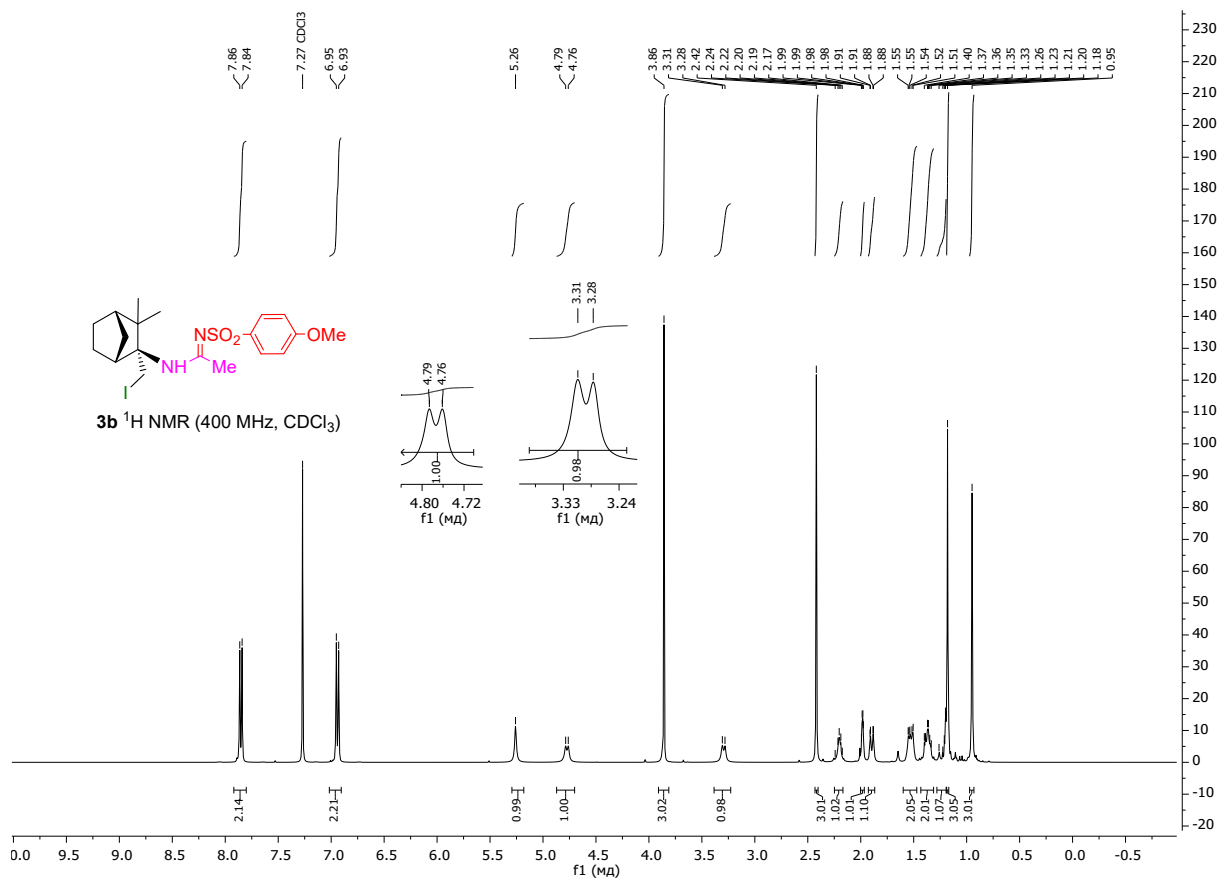

**Figure S15.** <sup>13</sup>C NMR spectrum of compound **3b**

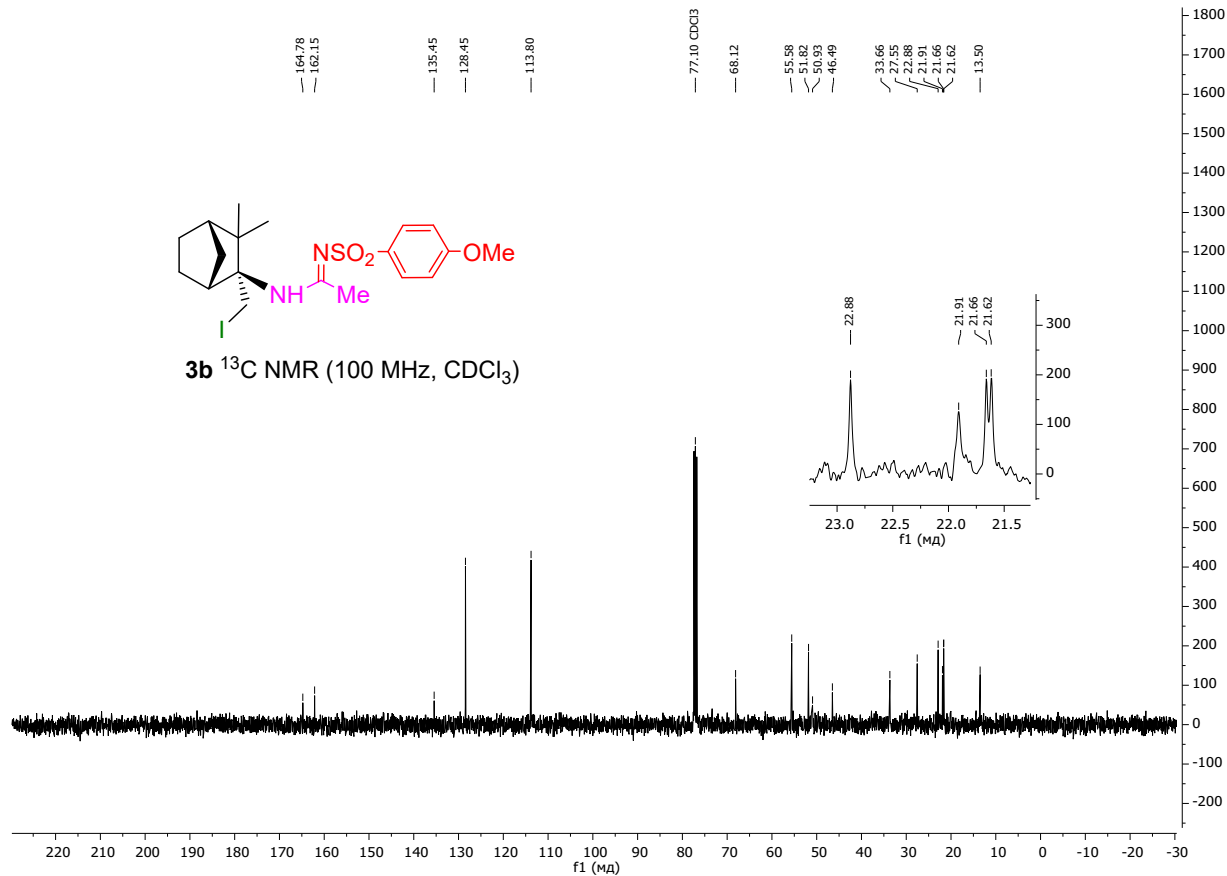



Figure S16. <sup>1</sup>H NMR spectrum of compound 3c

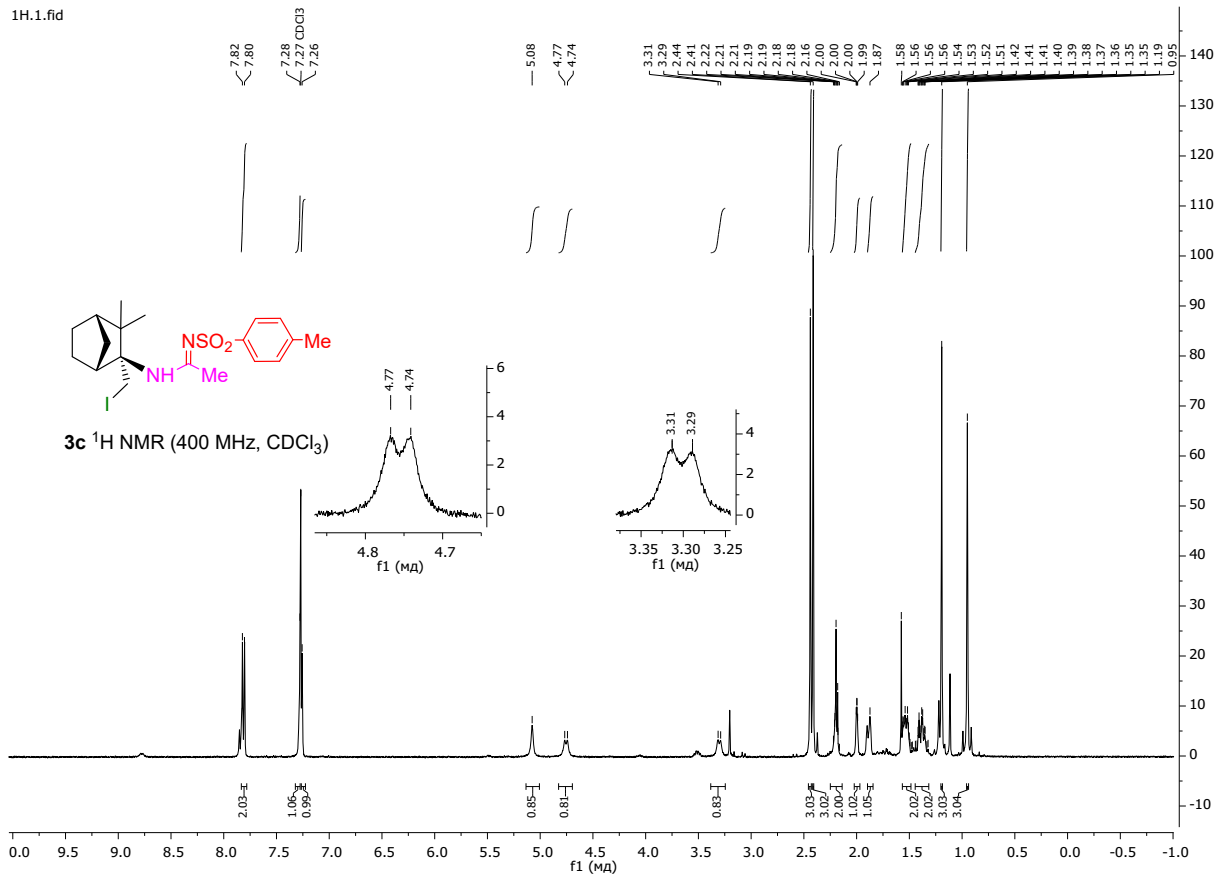

Figure S17. <sup>13</sup>C NMR spectrum of compound 3c

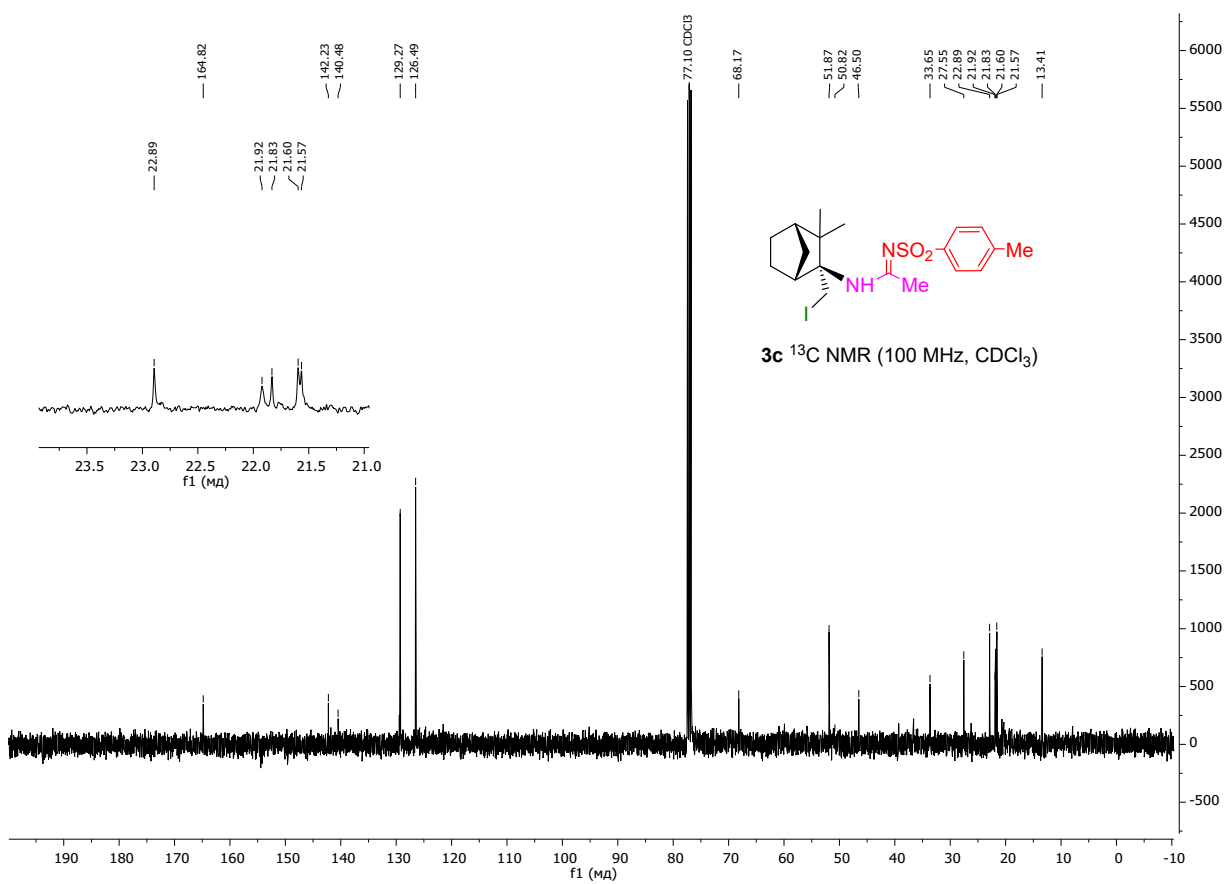

**Figure S18.** <sup>1</sup>H NMR spectrum of compound **3d**

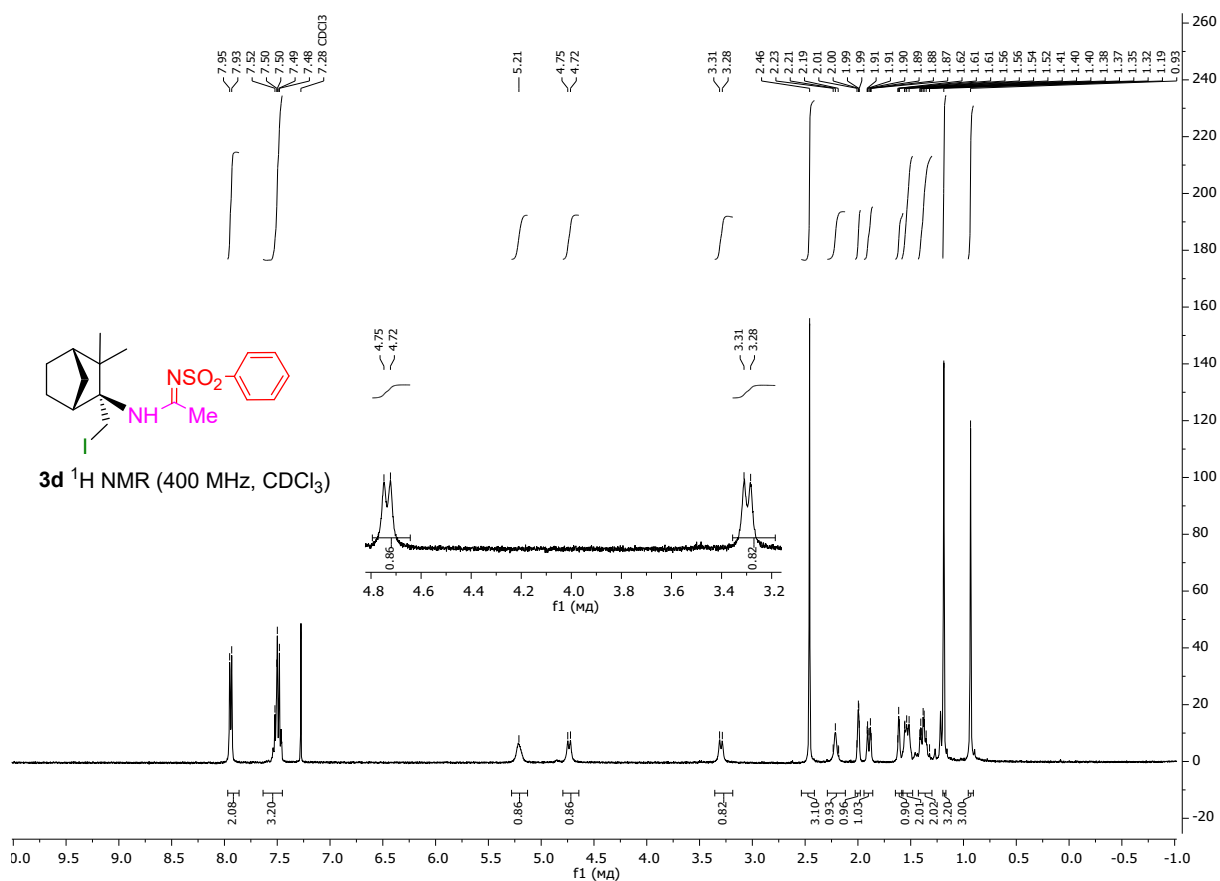

**Figure S19.**  $^{13}\text{C}$  NMR spectrum of compound **3d**

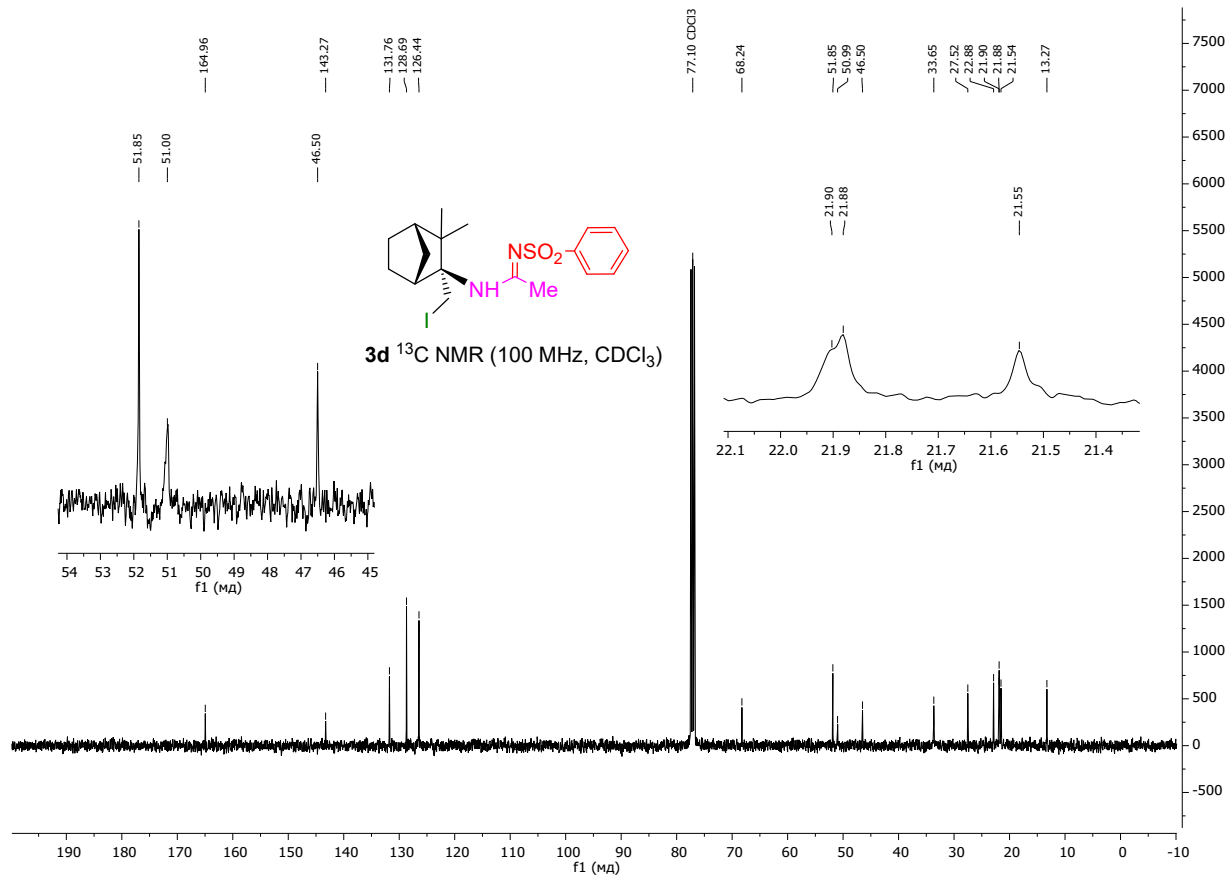

Figure S20. <sup>1</sup>H NMR spectrum of compound 3e

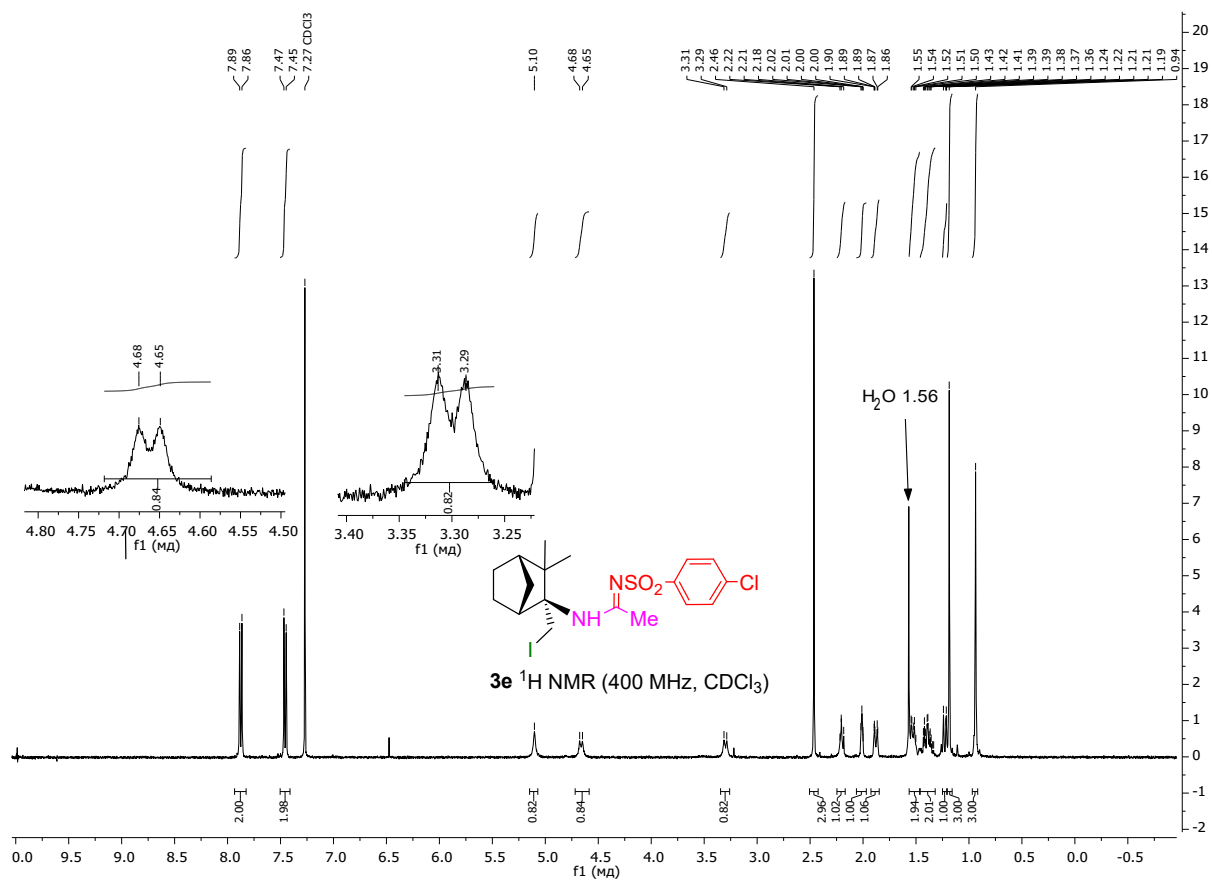

Figure S21. <sup>13</sup>C NMR spectrum of compound 3e

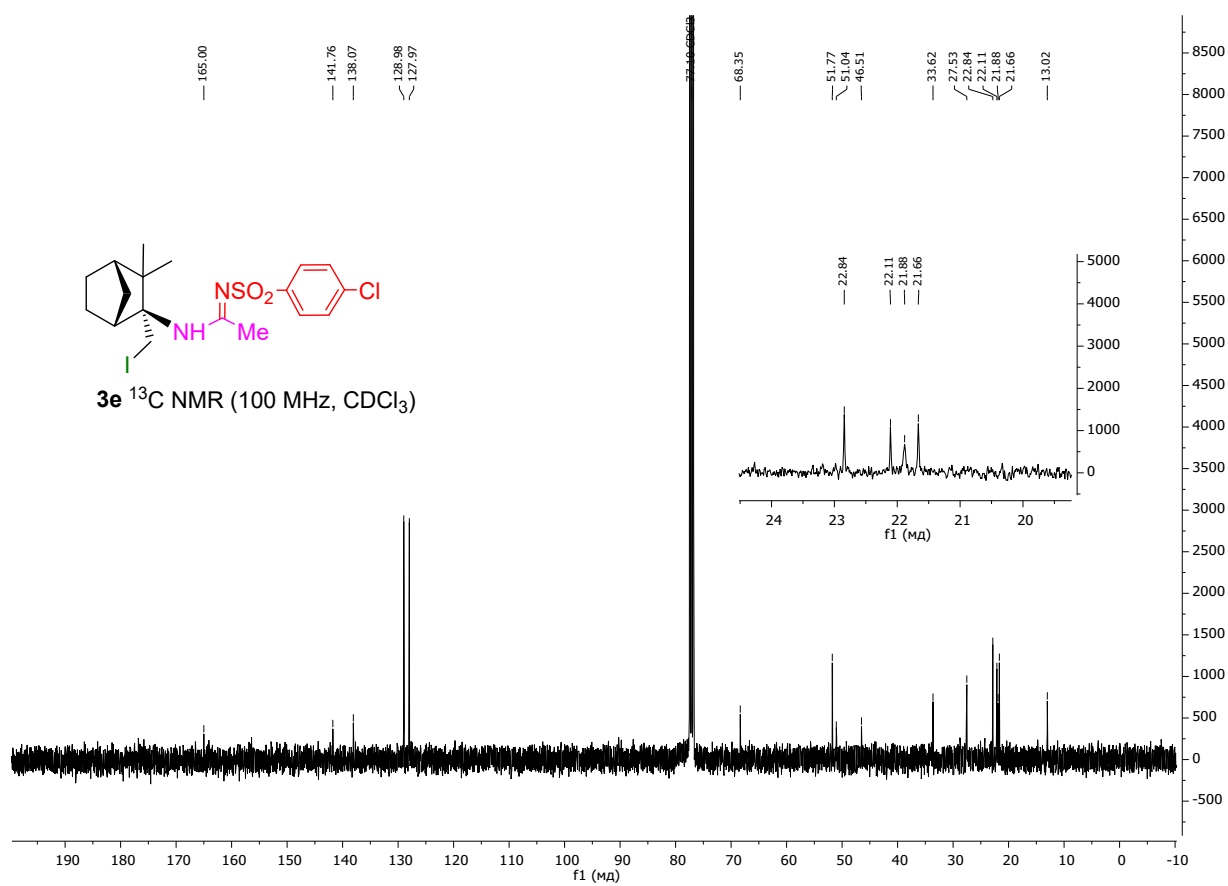

**Figure S22.**  $^1\text{H}$  NMR spectrum of compound **3f**

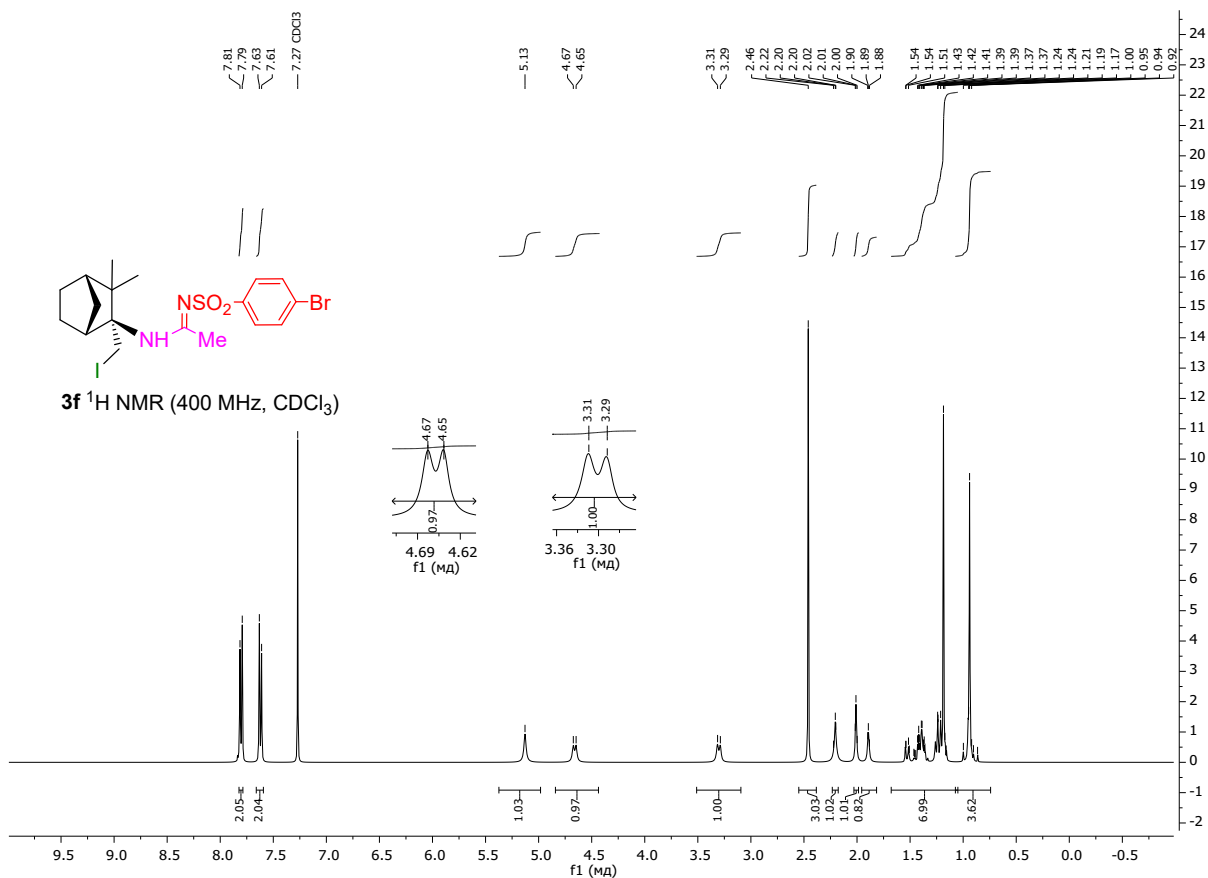

**Figure S23.** <sup>13</sup>C NMR spectrum of compound **3f**

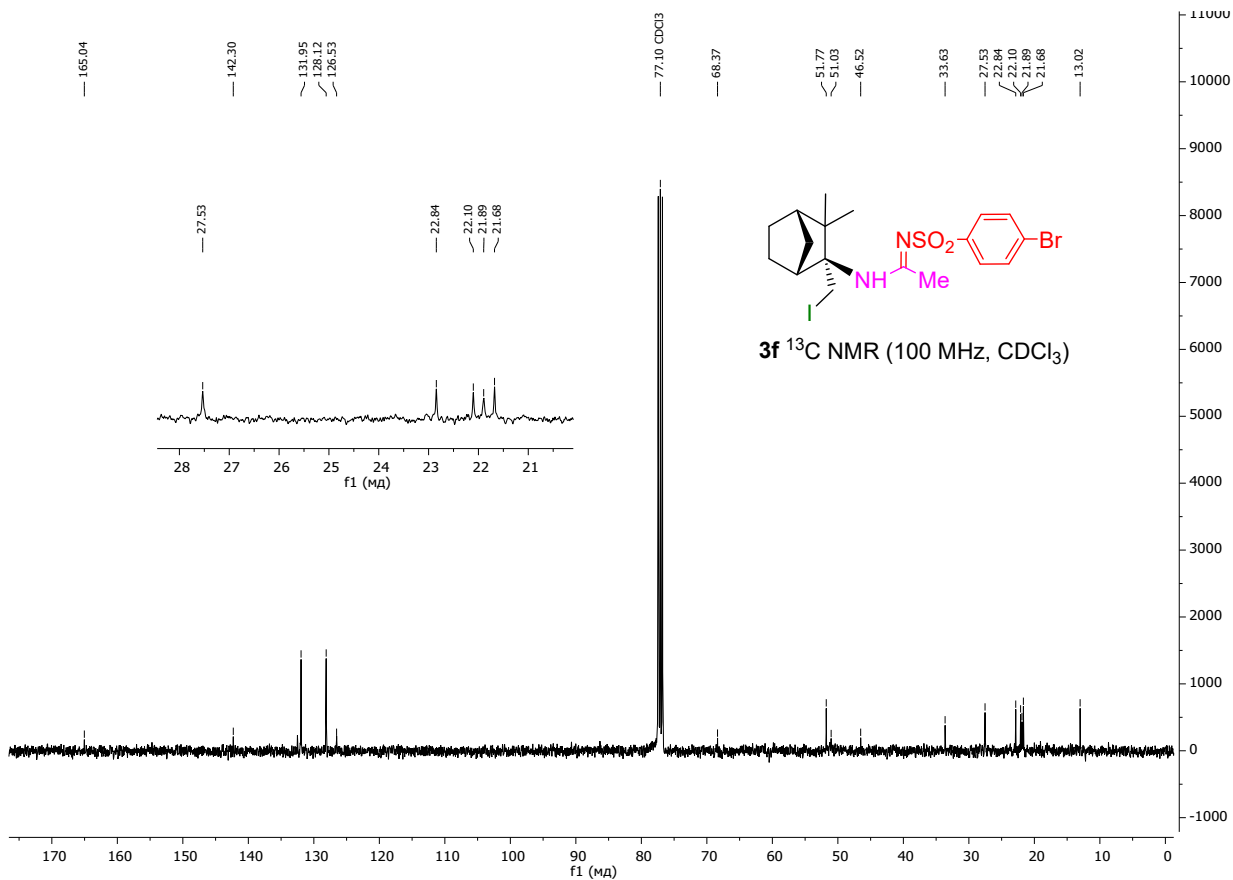

Figure S24. <sup>1</sup>H NMR spectrum of compound **3g**

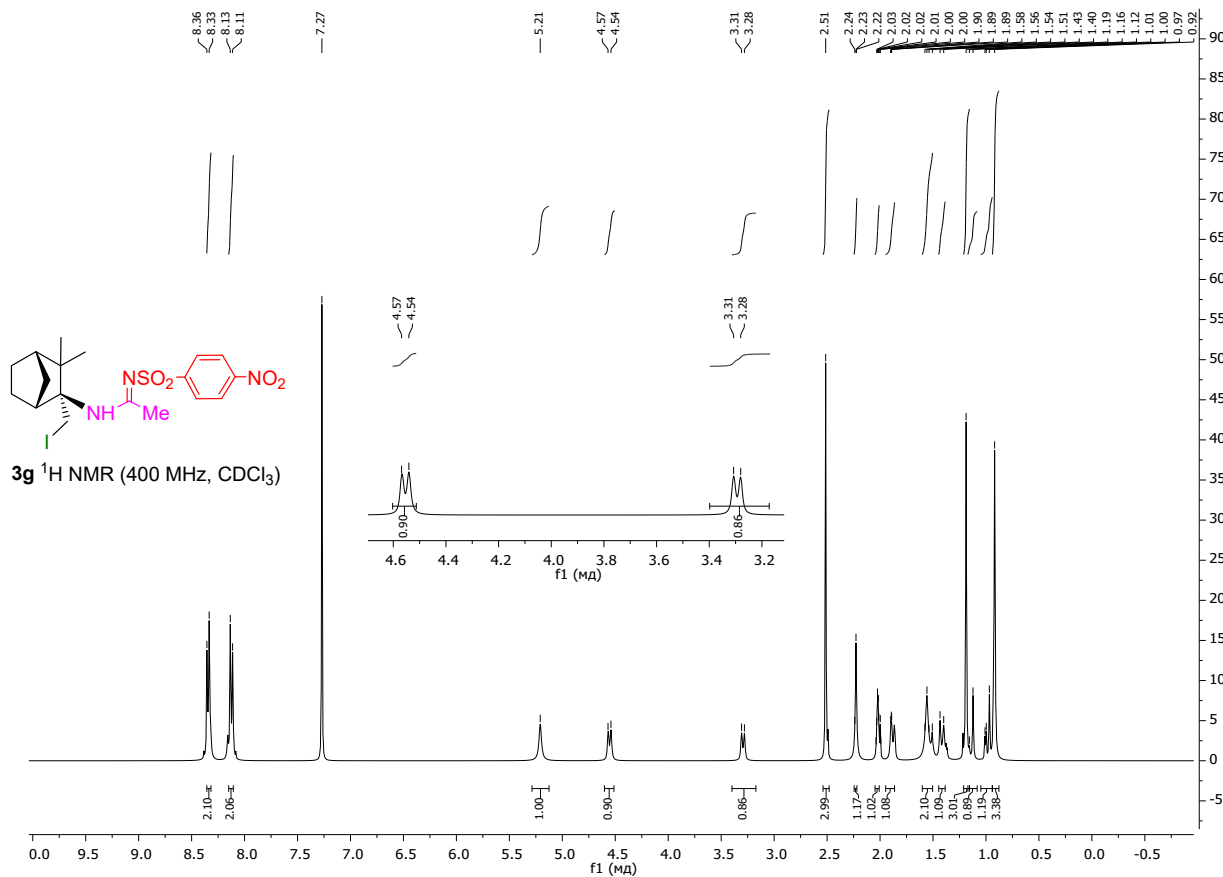

Figure S25. <sup>13</sup>C NMR spectrum of compound **3g**

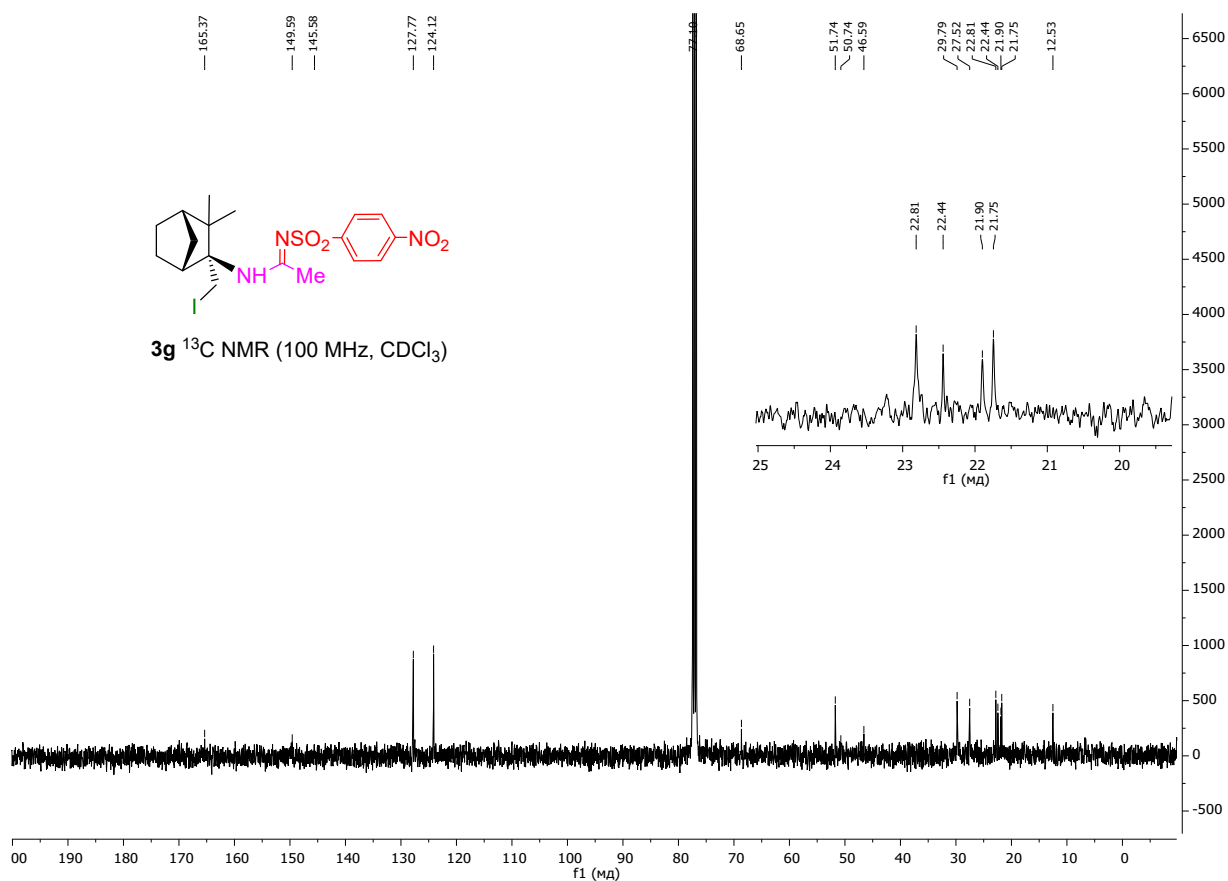

**Figure S26.**  $^1\text{H}$  NMR spectrum of compound **3h**

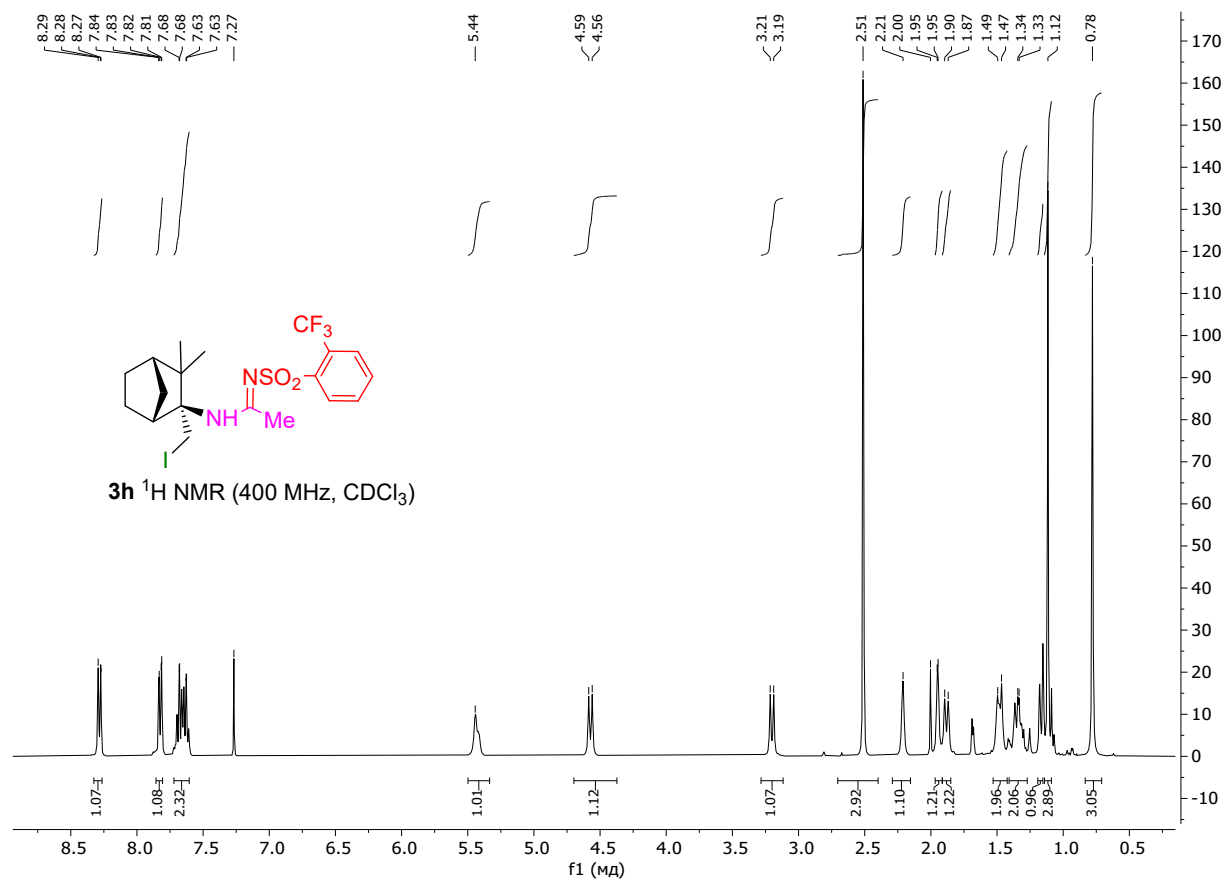



Figure S27.  $^{13}\text{C}$  NMR spectrum of compound **3h**

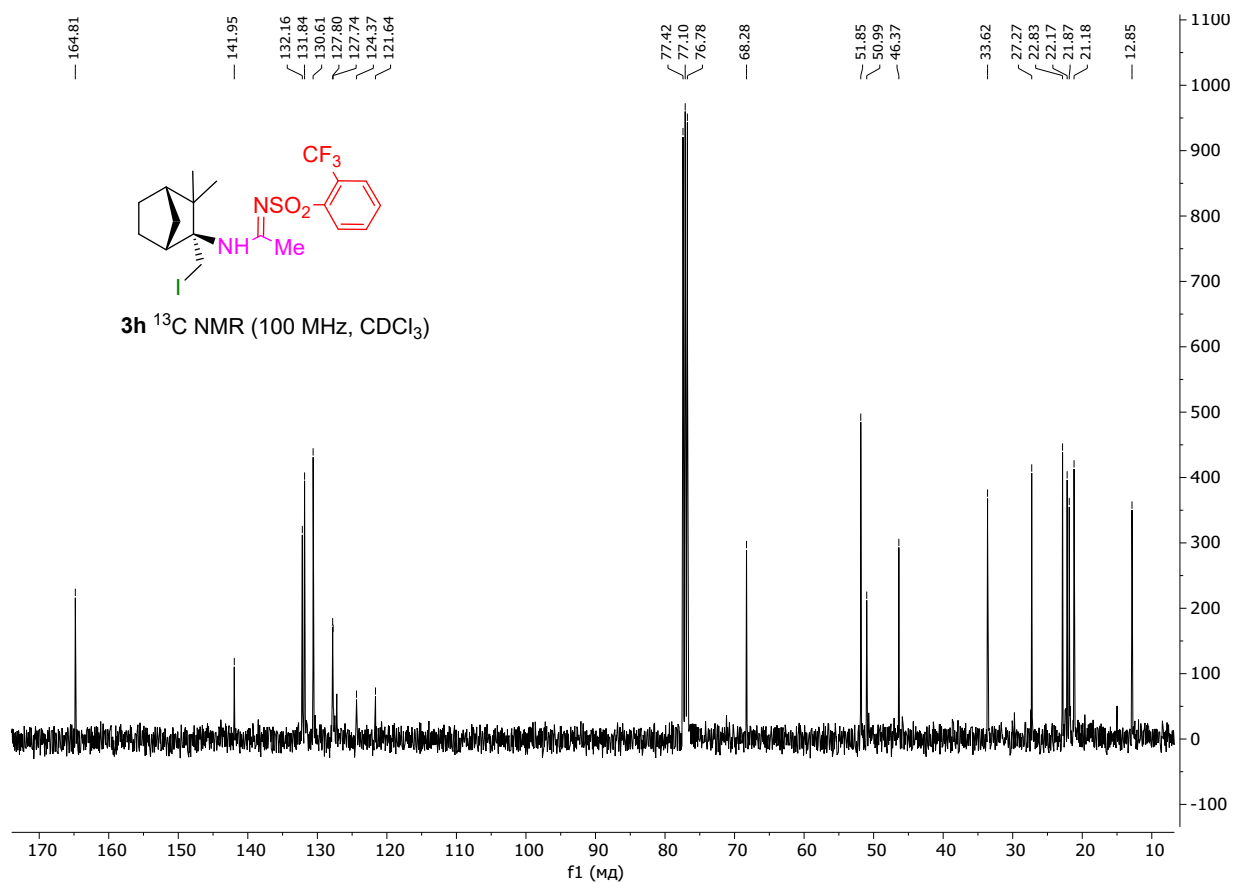

Figure S28.  $^{19}\text{F}$  NMR spectrum of compound **3h**

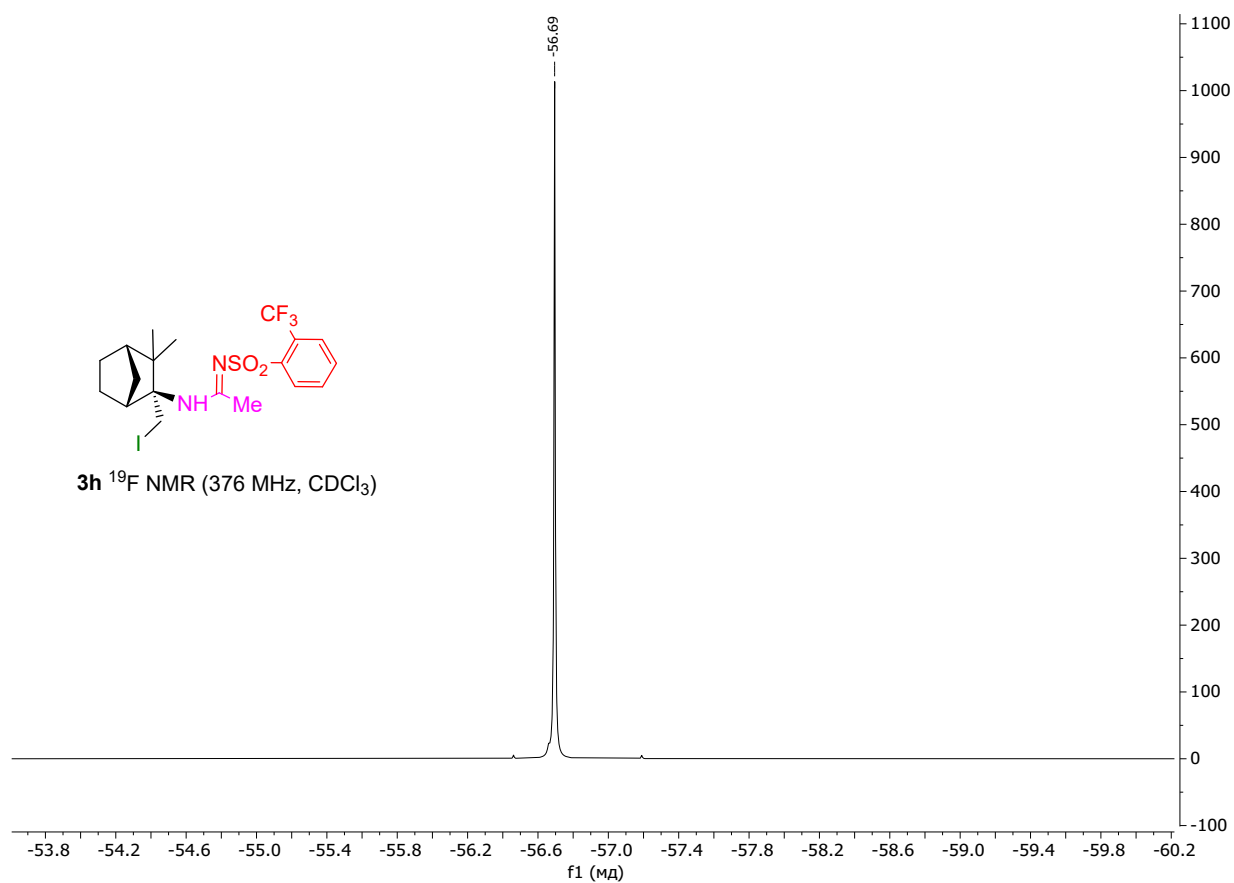

Figure S29. <sup>1</sup>H NMR spectrum of compound **3i**

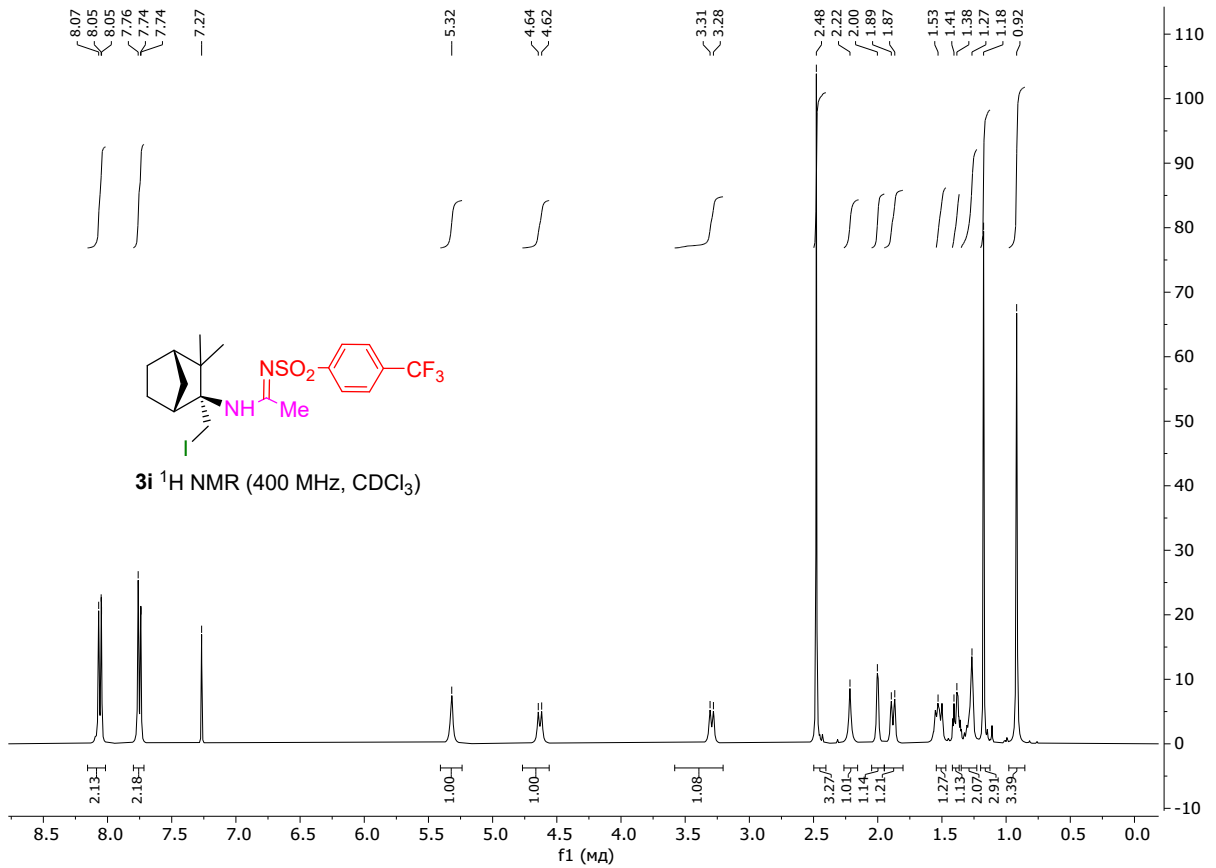

Figure S30. <sup>13</sup>C NMR spectrum of compound **3i**

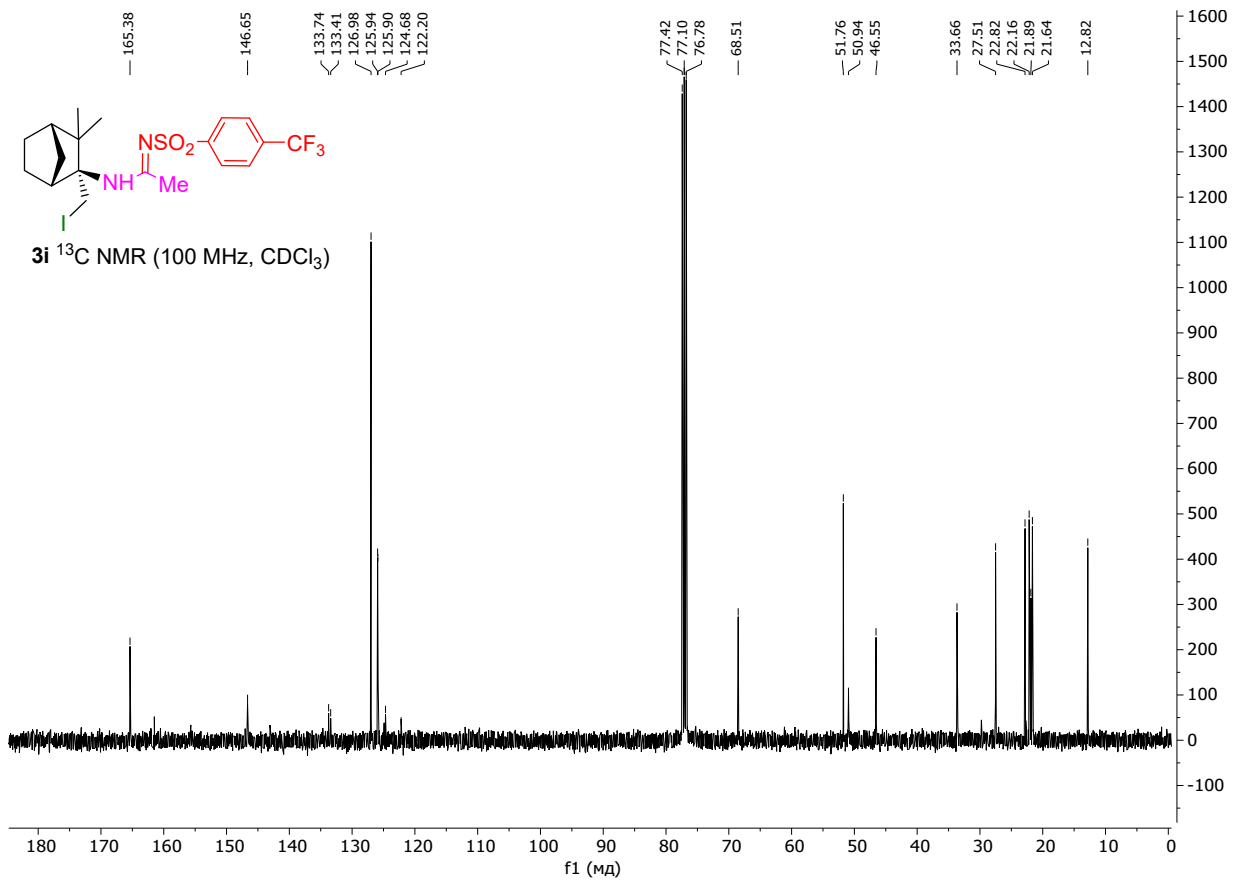

**Figure S31.**  $^{19}\text{F}$  NMR spectrum of compound **3i**

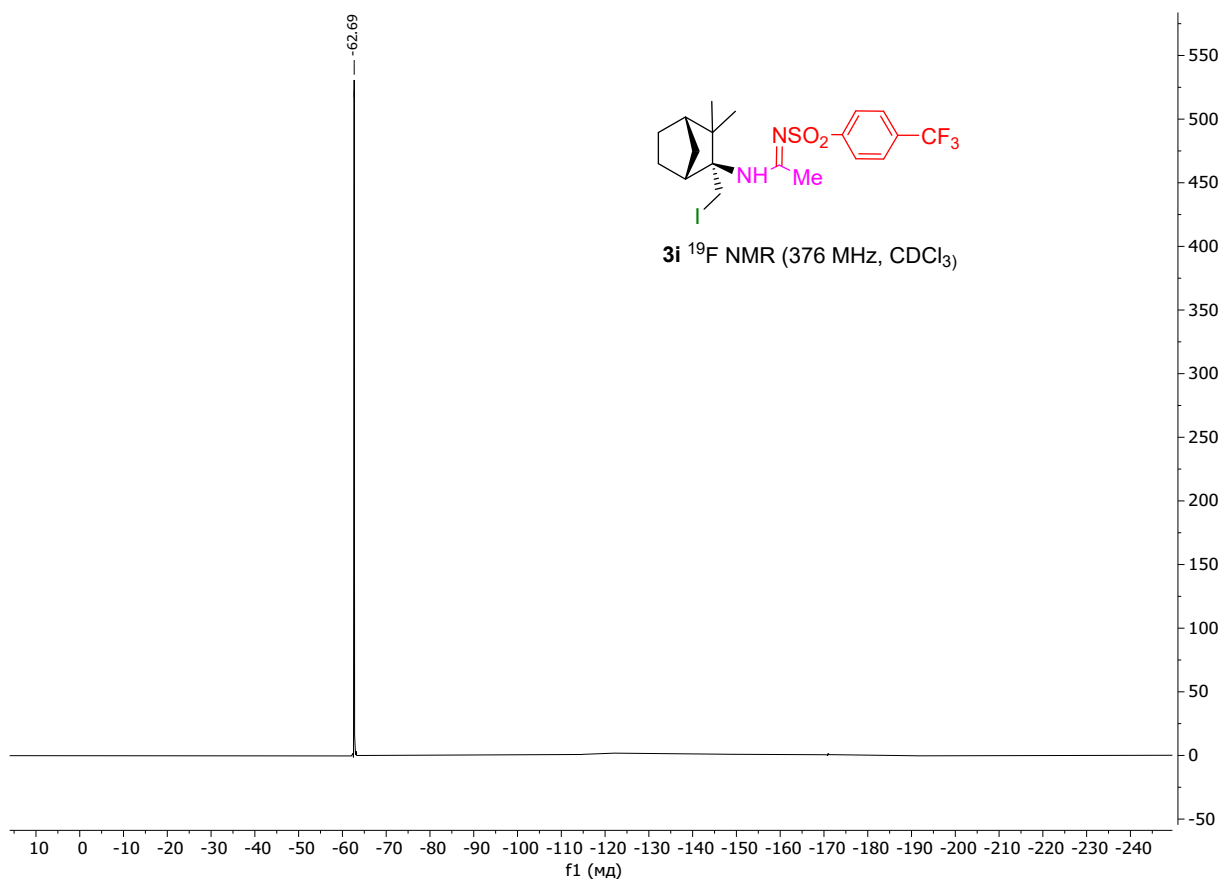

**Figure S32.**  $^1\text{H}$  NMR spectrum of compound **3j**

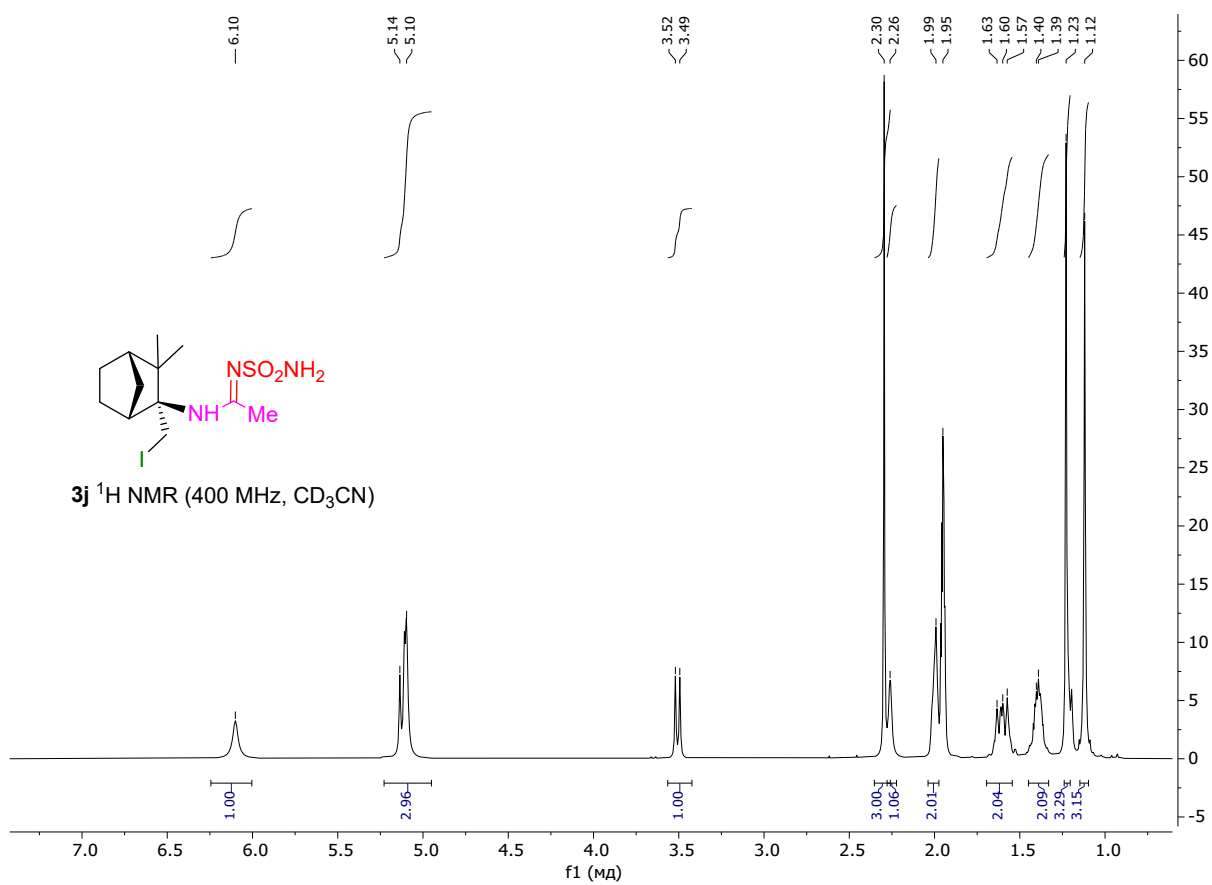

Figure S33.  $^{13}\text{C}$  NMR spectrum of compound **3j**

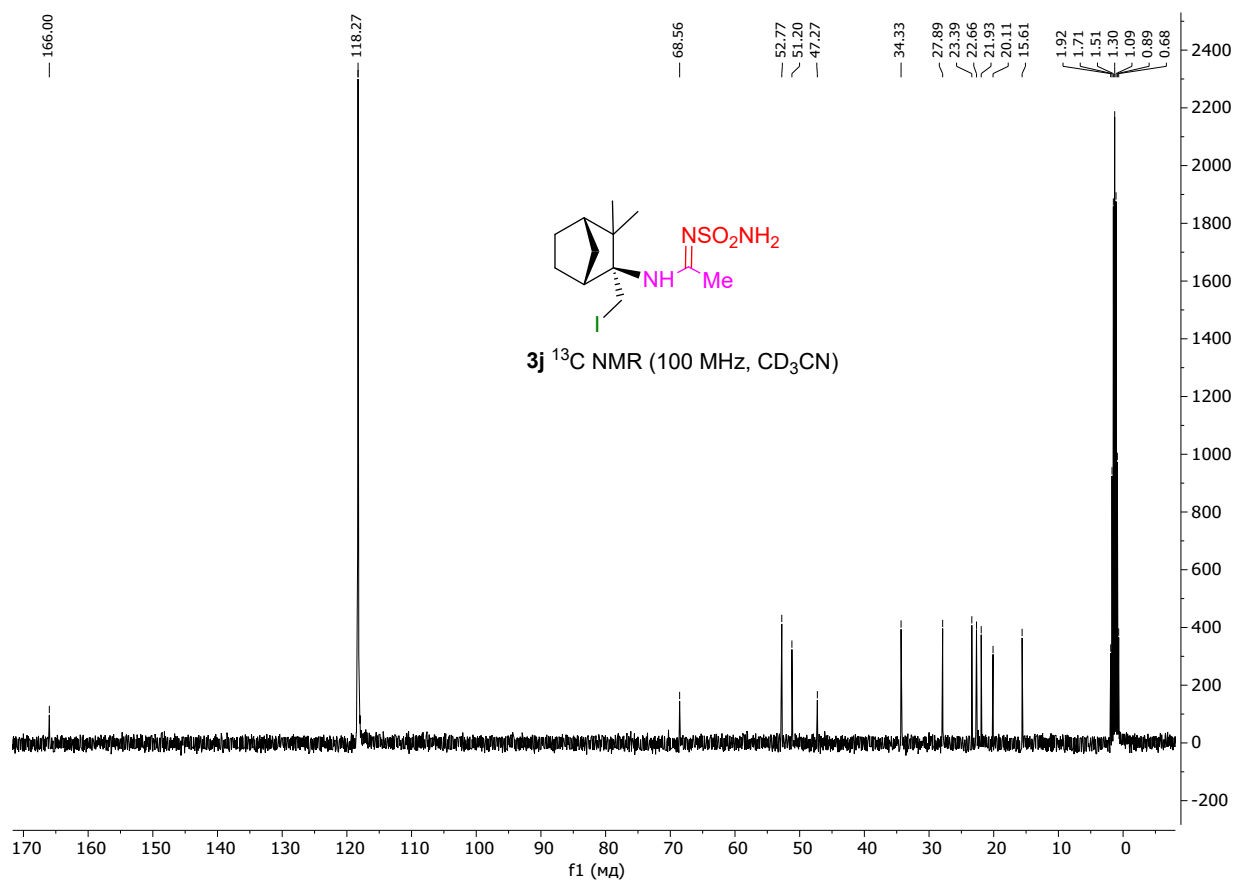

Figure S34.  $^1\text{H}$  NMR spectrum of compound **4**

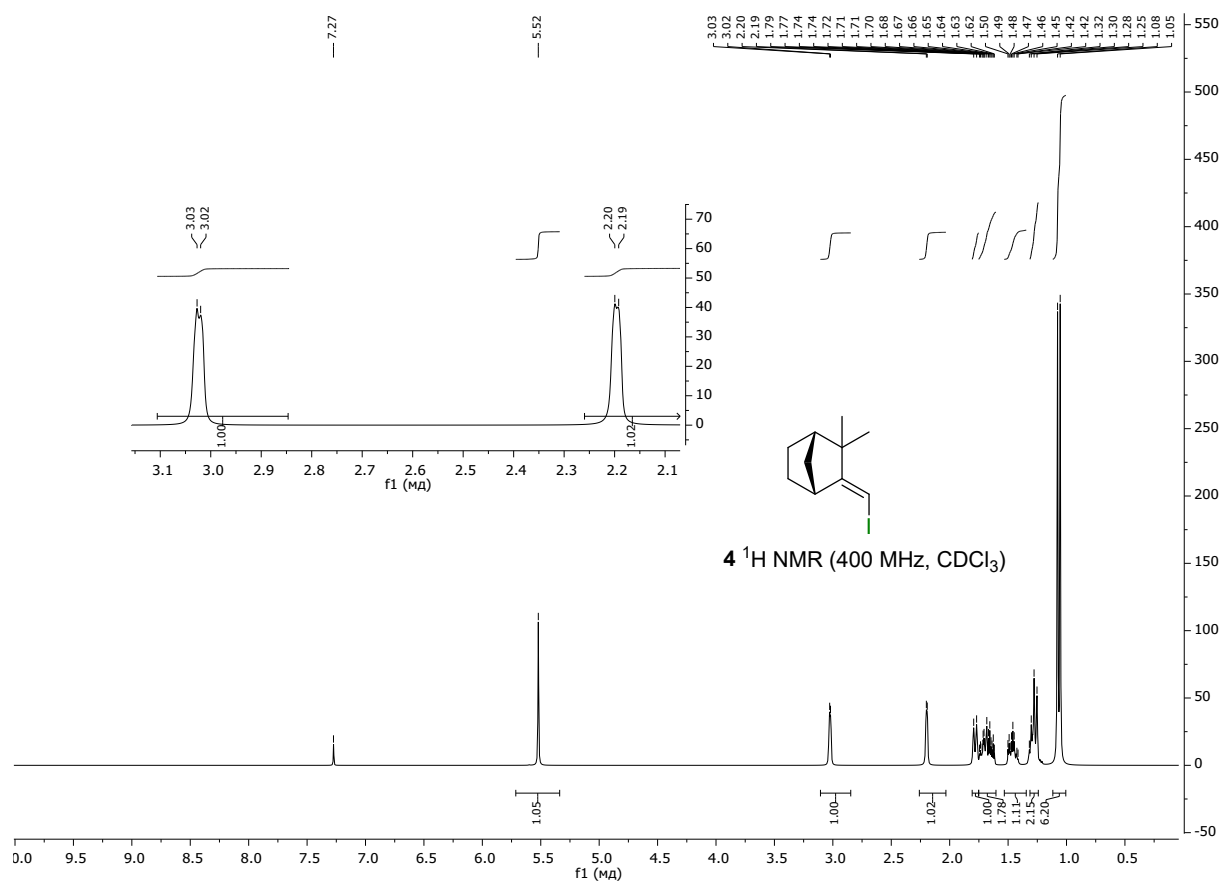

**Figure S35.**  $^{13}\text{C}$  NMR spectrum of compound **4**

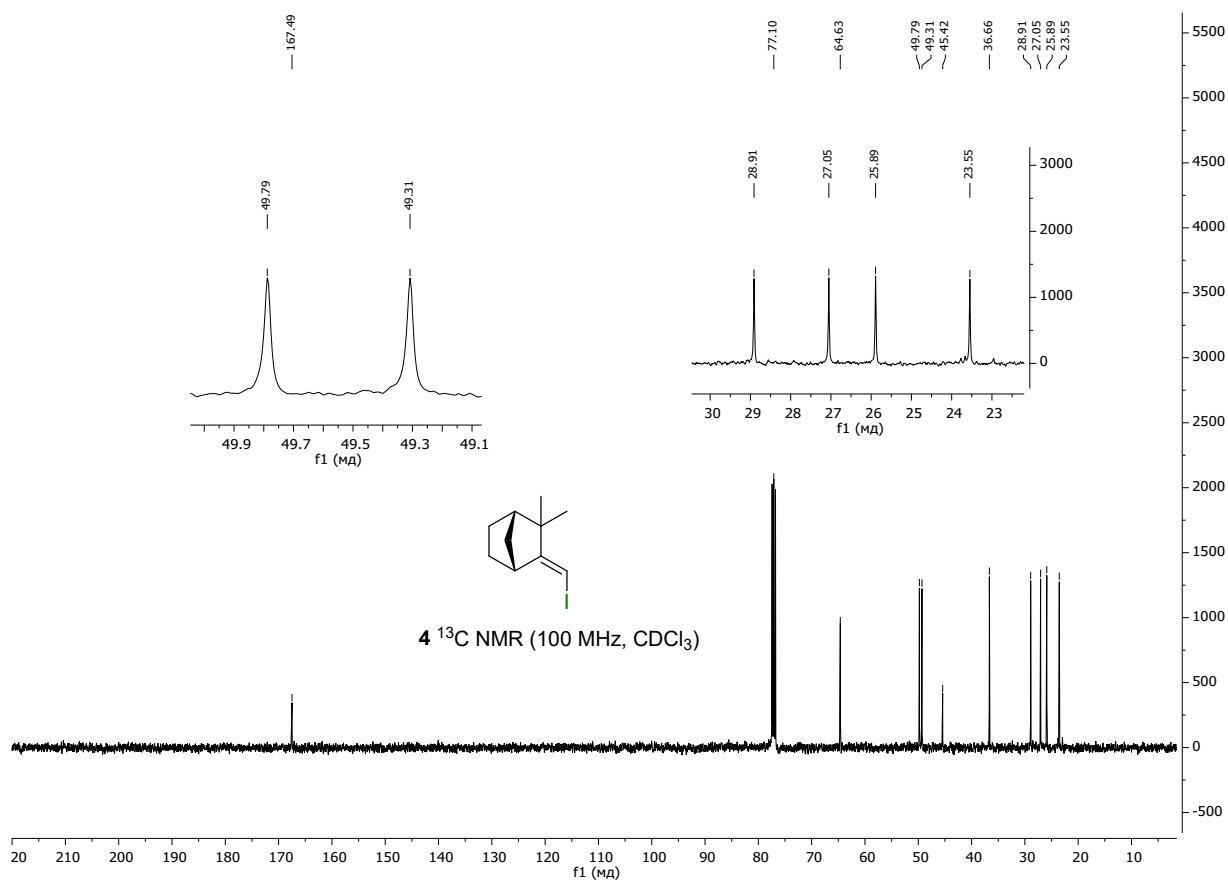

**Figure S36.**  $^{13}\text{C}$  NMR (*J-mod*) spectrum of compound **4**

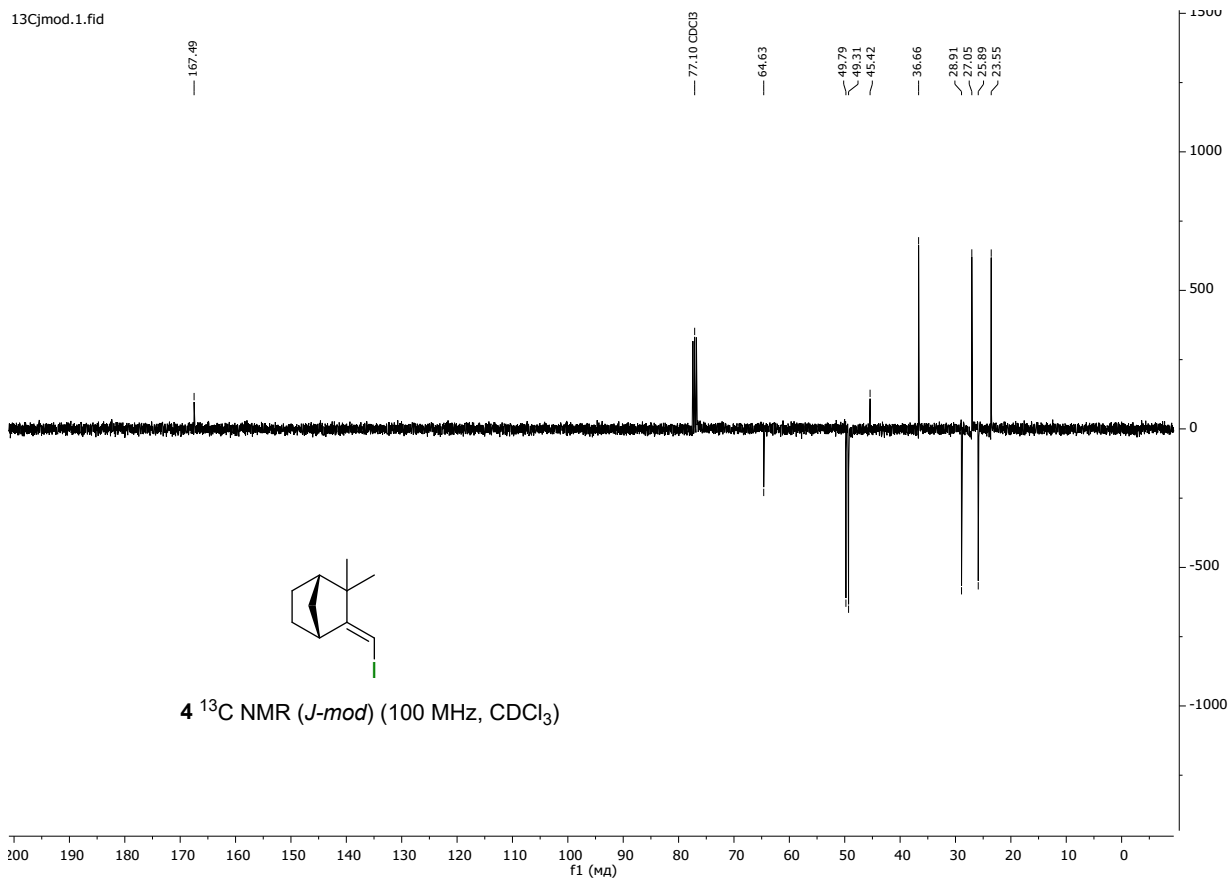

Figure S37. <sup>1</sup>H NMR spectrum of compound **5a**

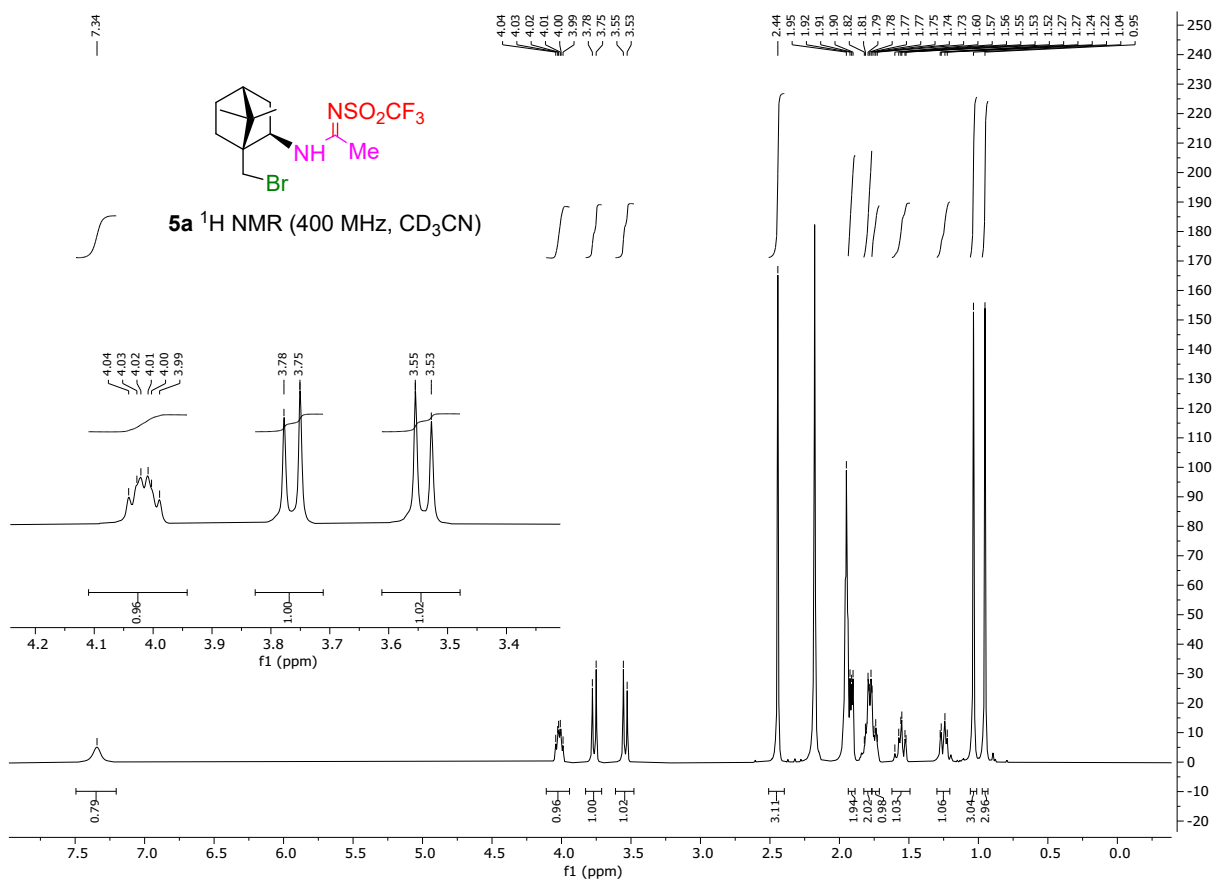

Figure S38.  $^{13}\text{C}$  NMR spectrum of compound **5a**

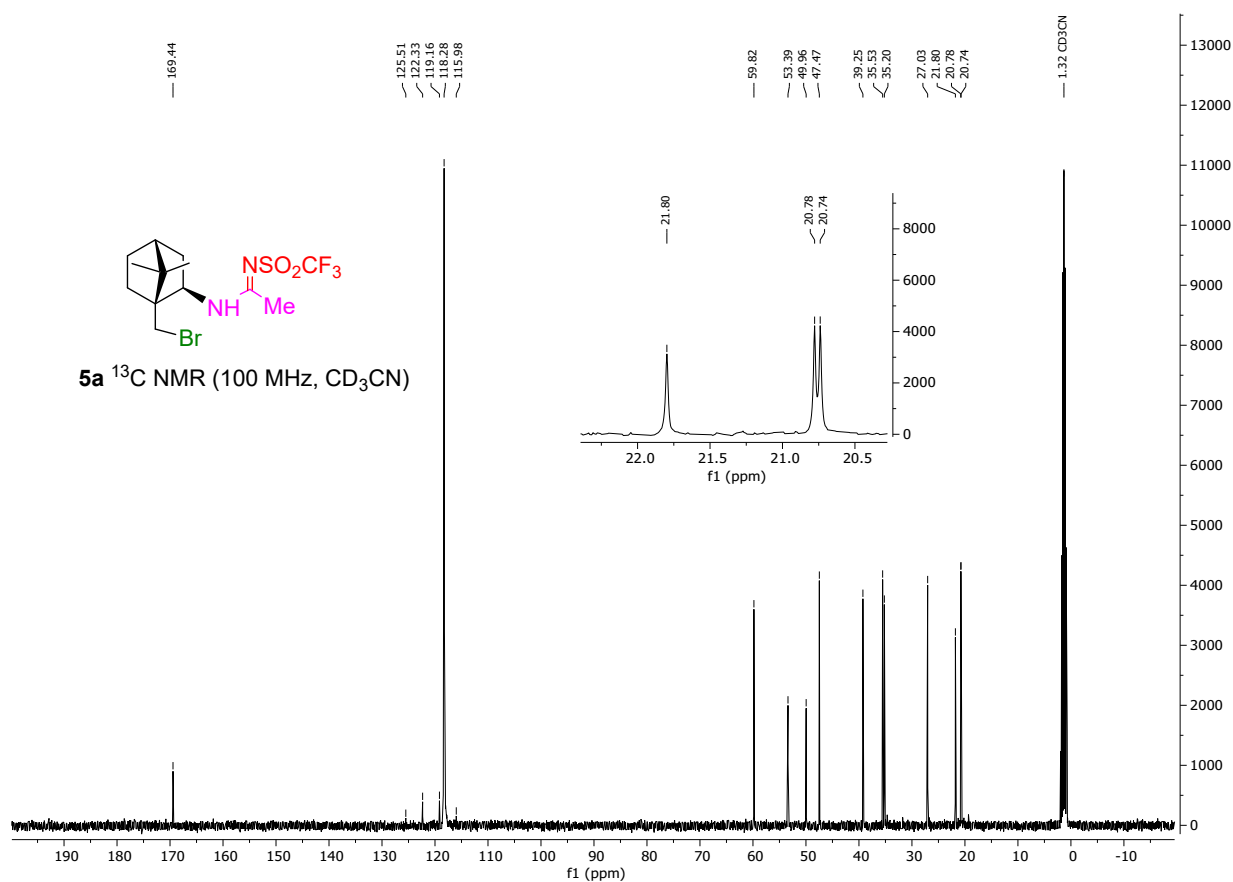

Figure S39.  $^{13}\text{C}$  NMR (*J-mod*) spectrum of compound **5a**

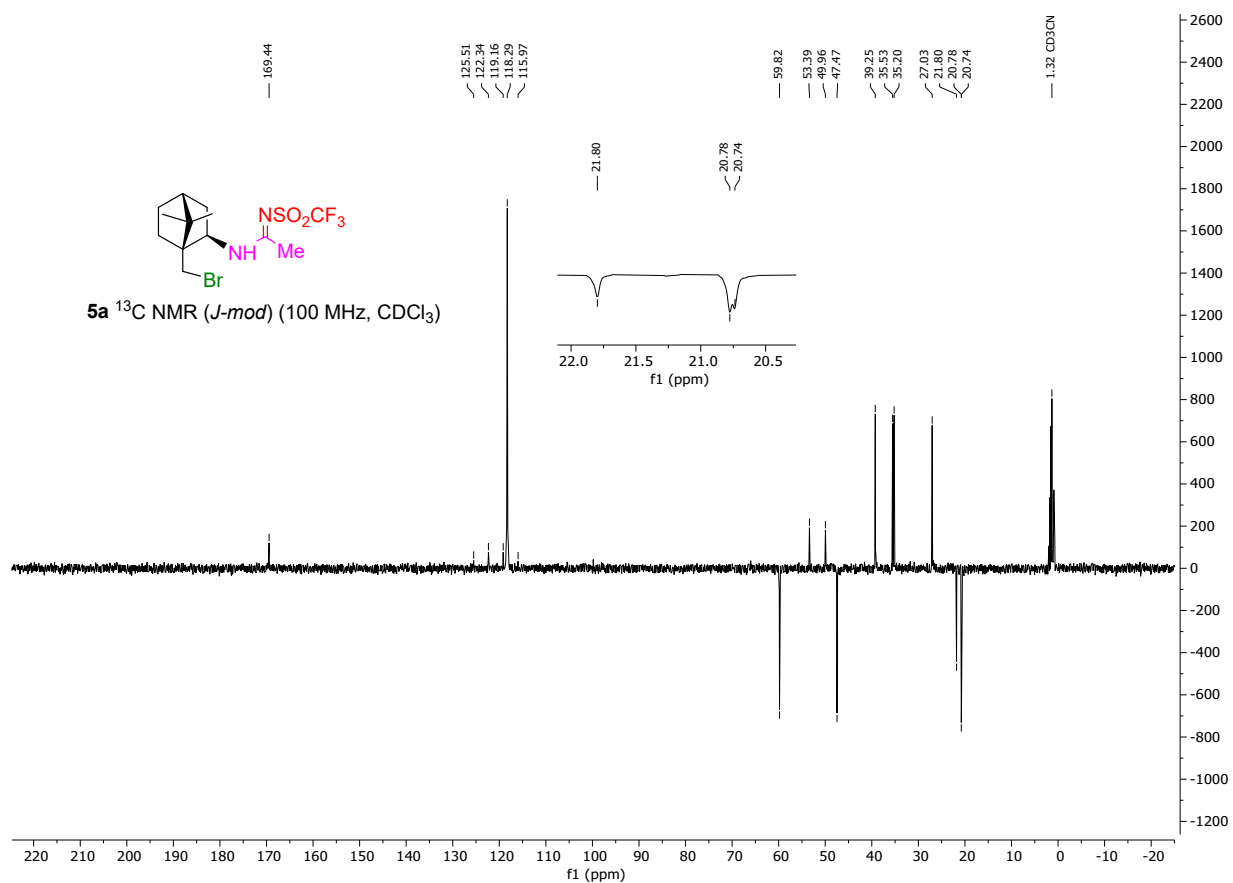



Figure S40.  $^{19}\text{F}$  NMR spectrum of compound **5a**

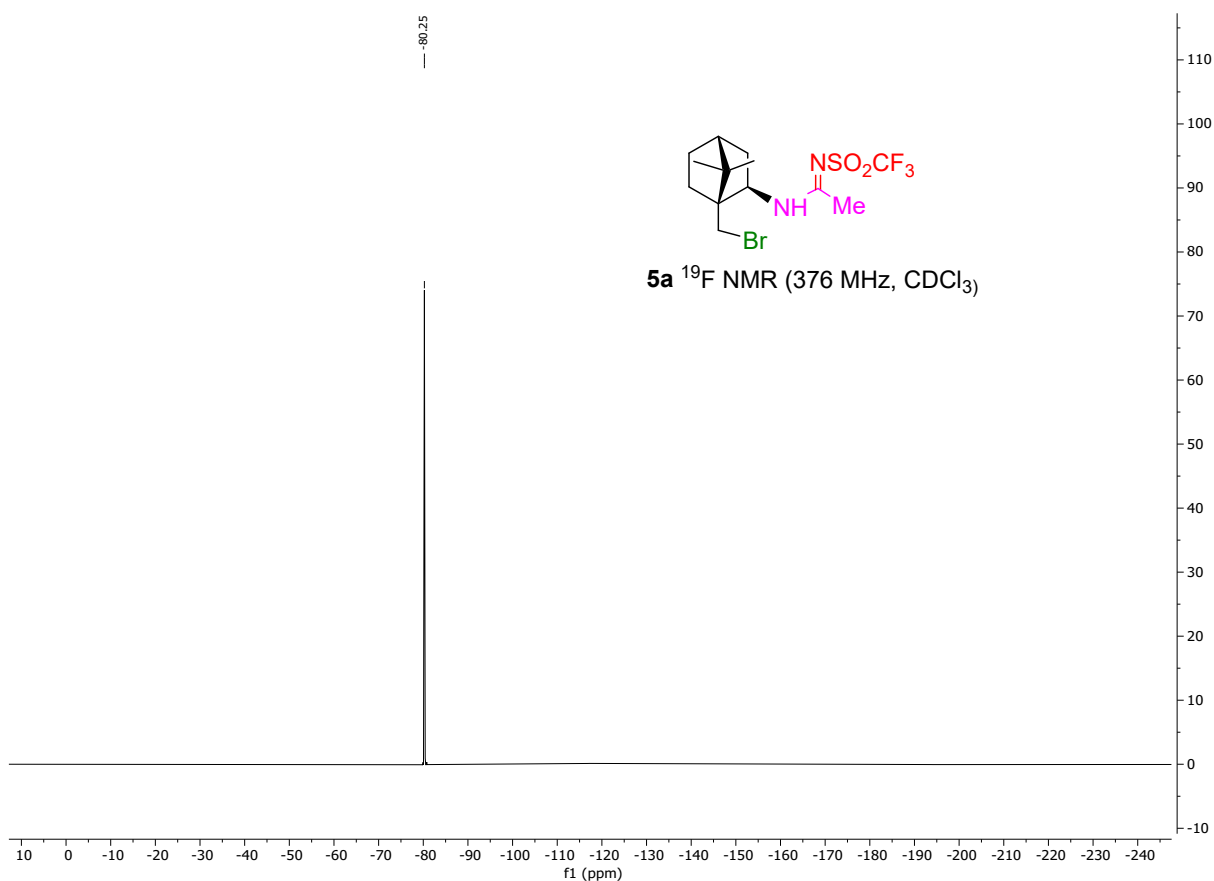

Figure S41.  $^1\text{H}$  NMR spectrum of compound **5c**

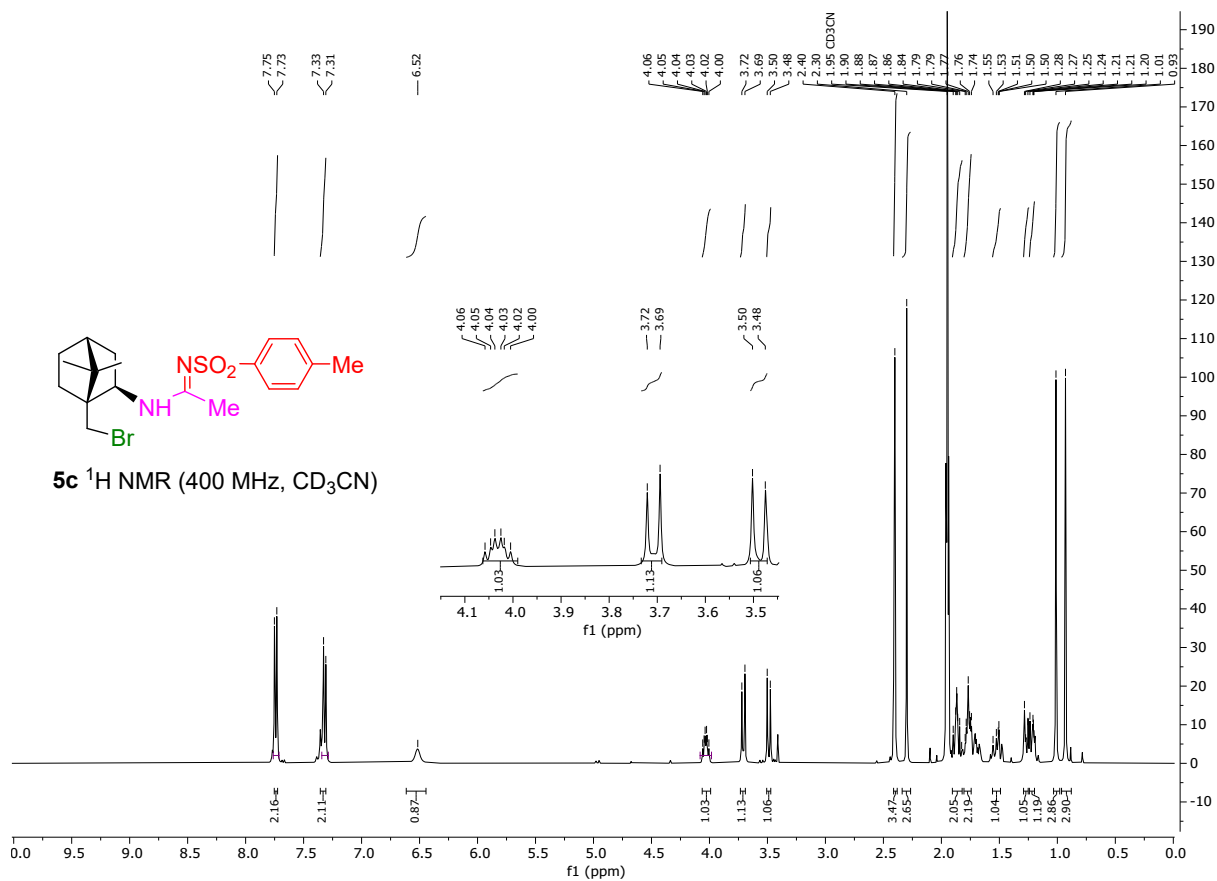

Figure S42. <sup>13</sup>C NMR spectrum of compound 5c

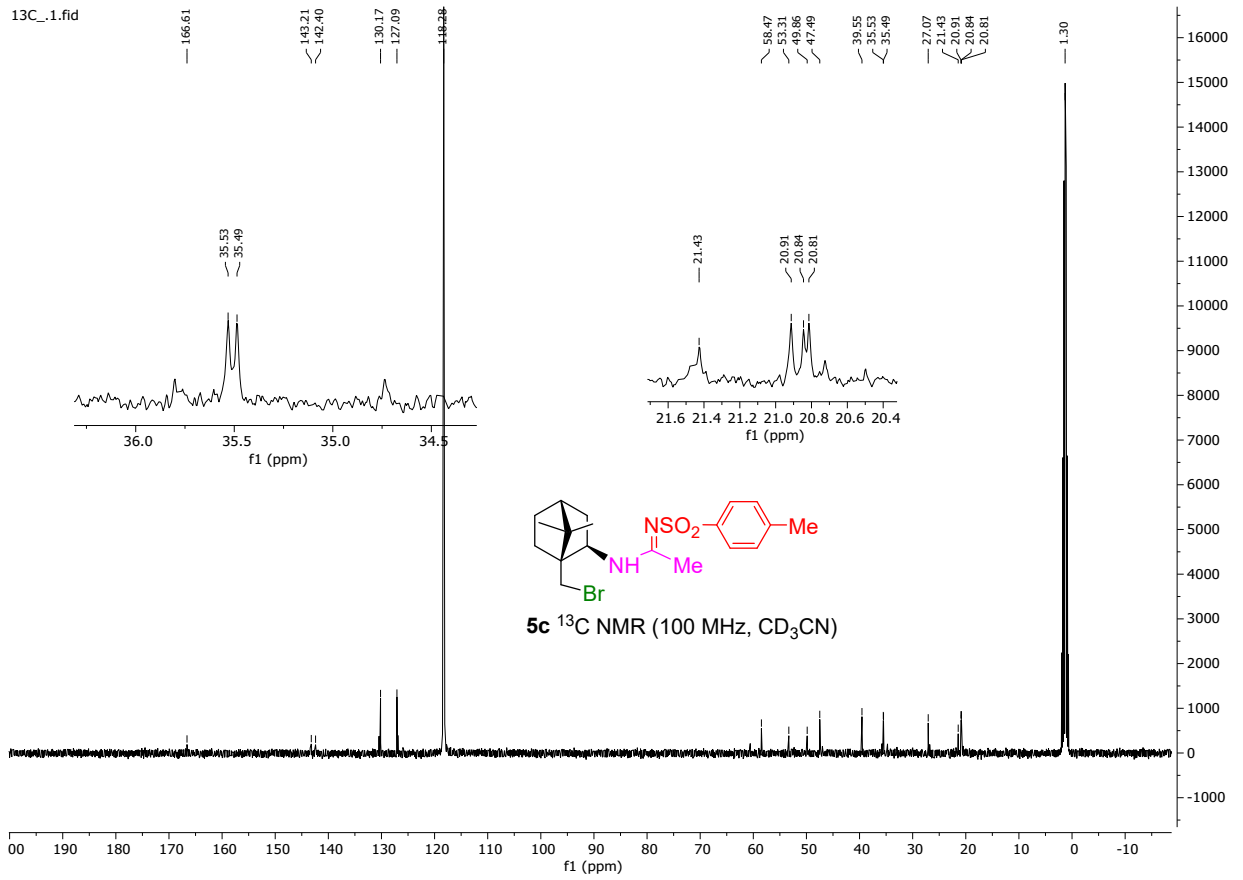

Figure S43. <sup>1</sup>H NMR spectrum of compound 5e

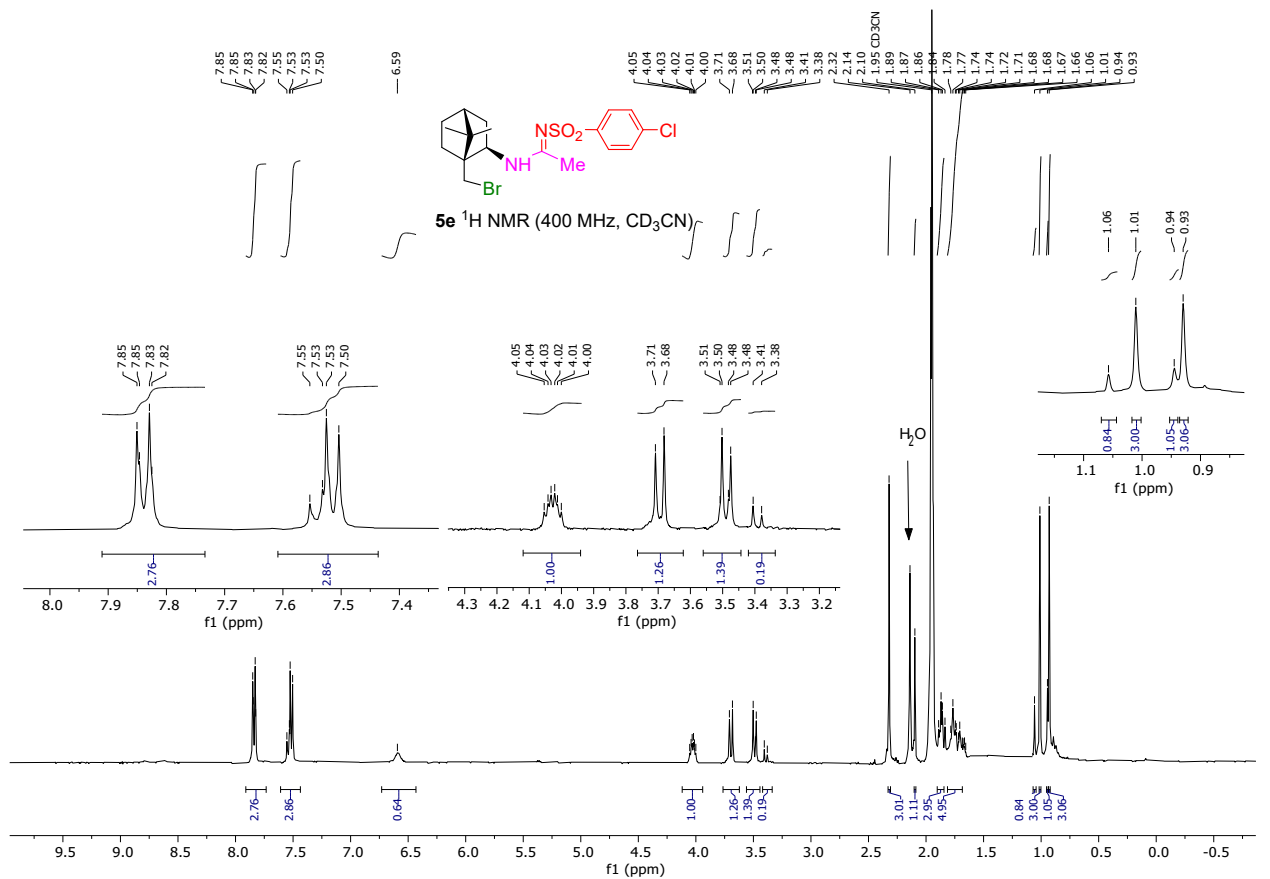

Figure S44.  $^{13}\text{C}$  NMR spectrum of compound **5e**

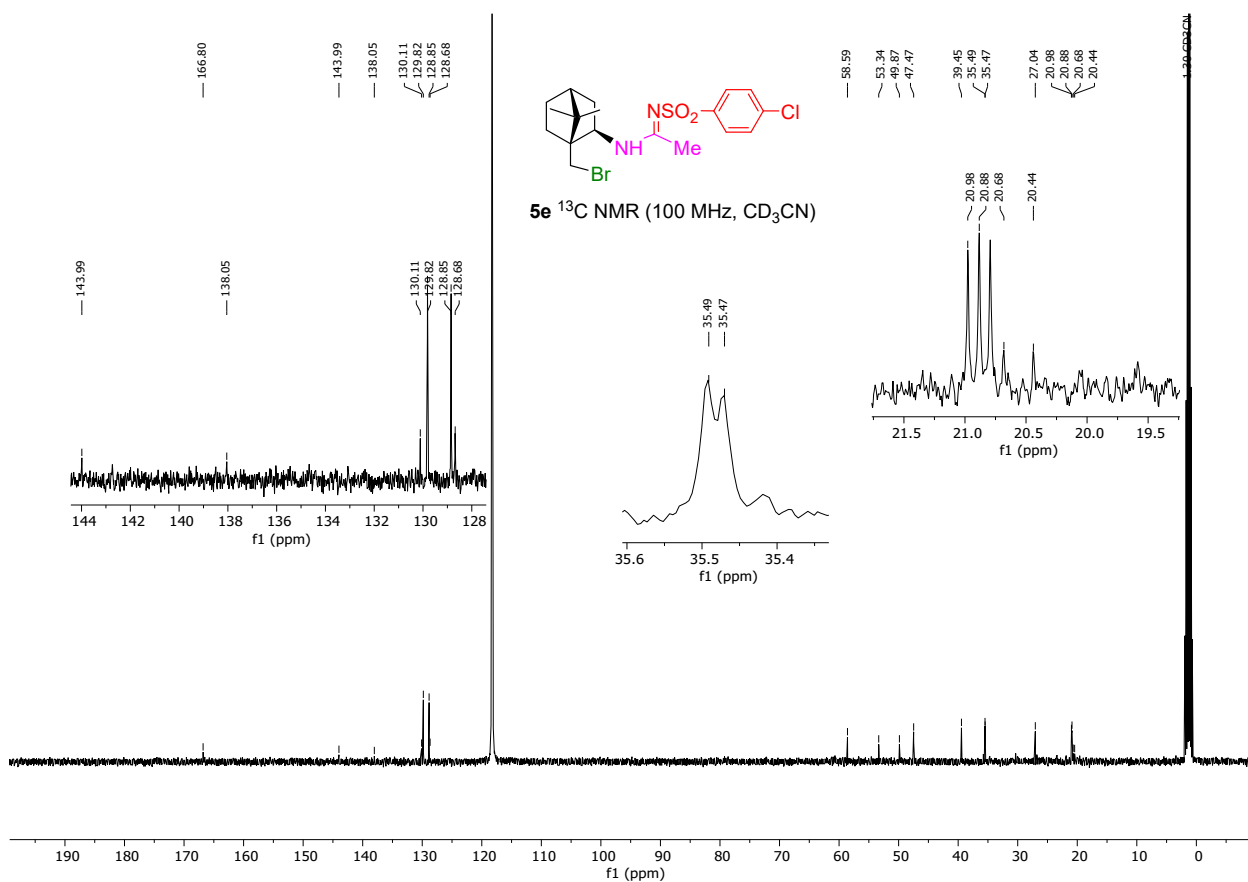

Figure S45.  $^1\text{H}$  NMR spectrum of compound **5h**

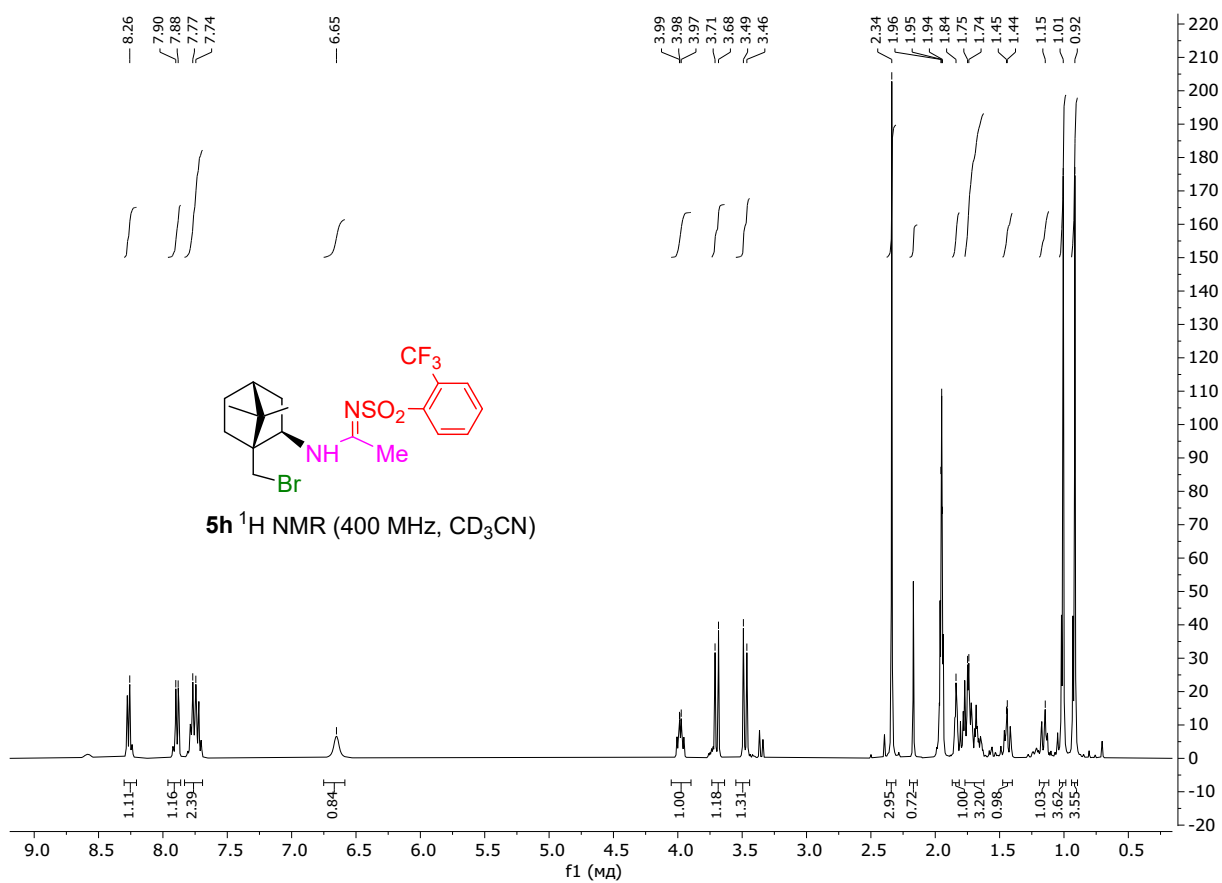

Figure S46.  $^{13}\text{C}$  NMR spectrum of compound **5h**

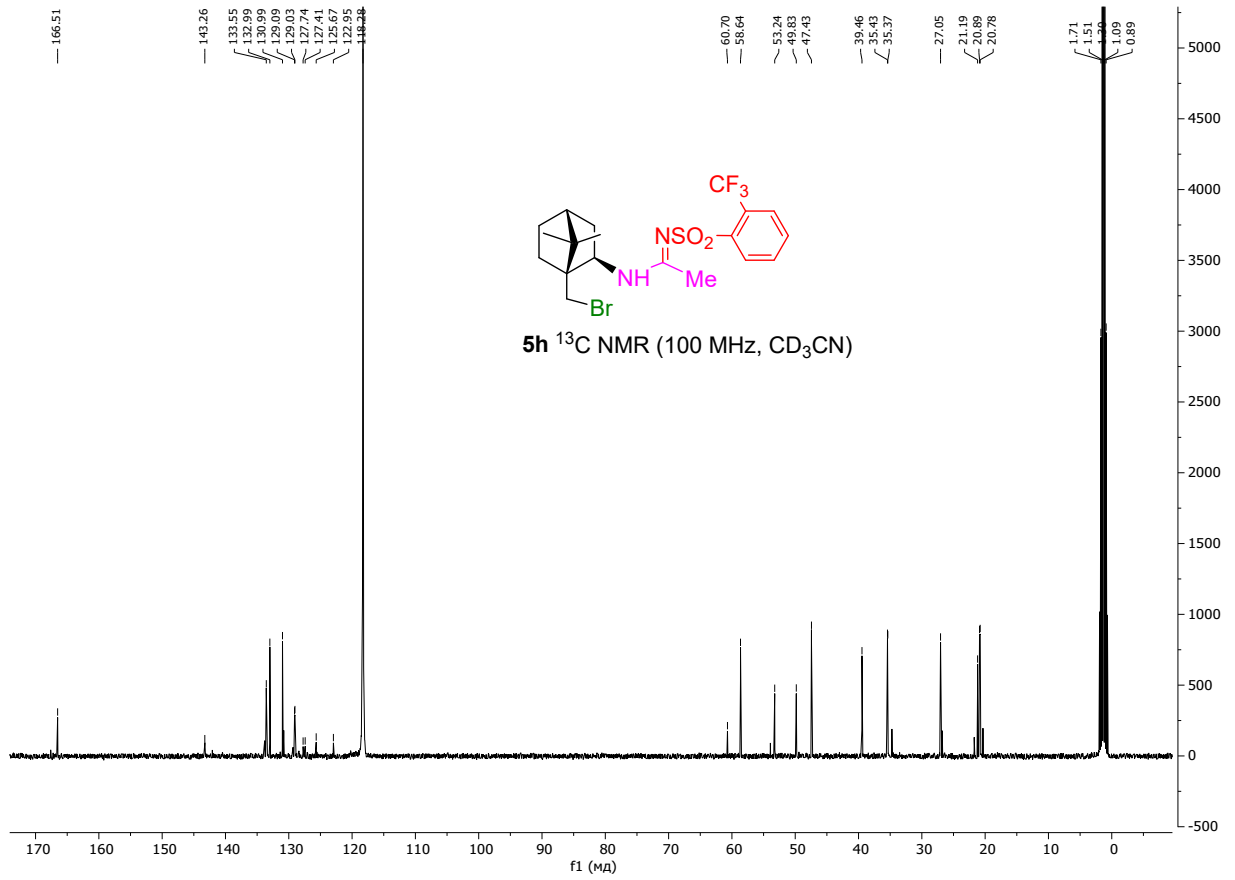

Figure S47.  $^{19}\text{F}$  NMR spectrum of compound **5h**

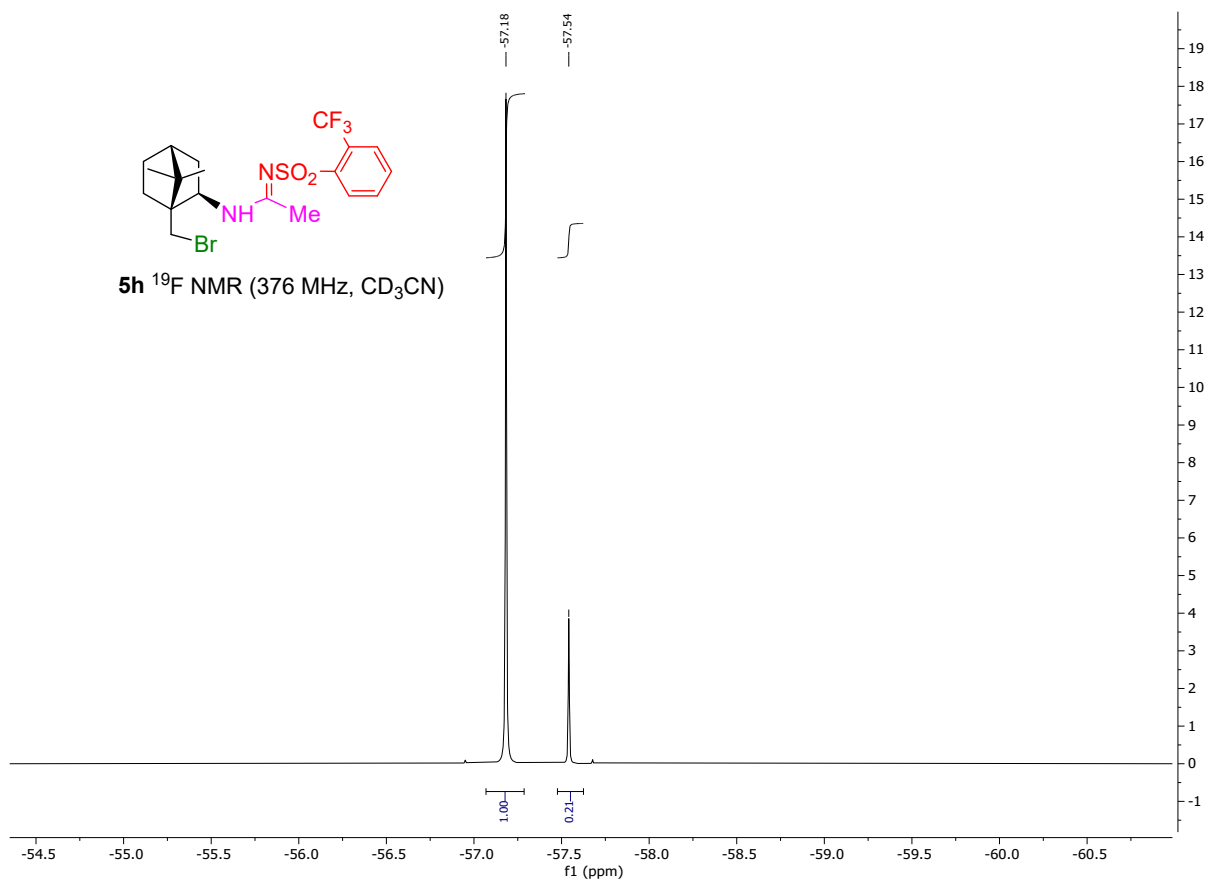

Figure S48. <sup>1</sup>H NMR spectrum of compound **5i**

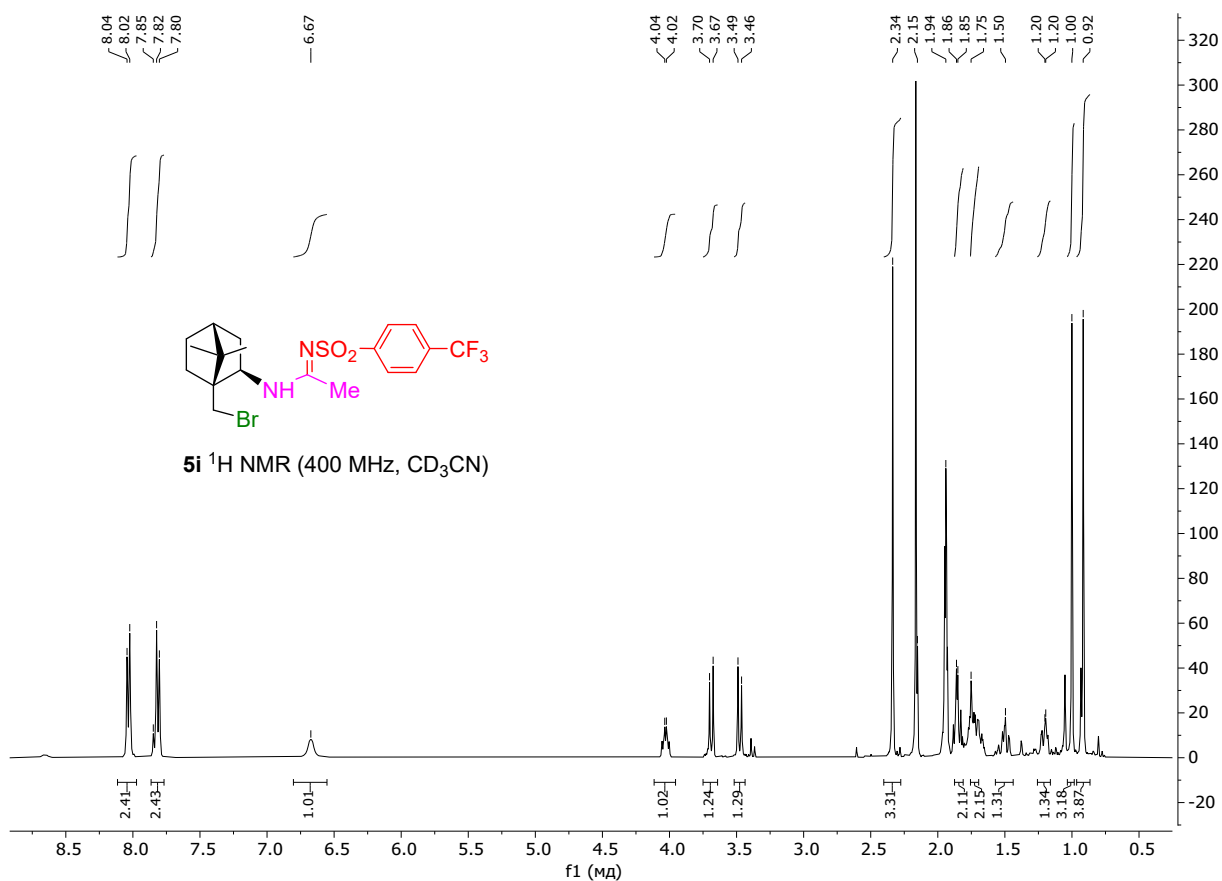

Figure S49. <sup>13</sup>C NMR spectrum of compound **5i**

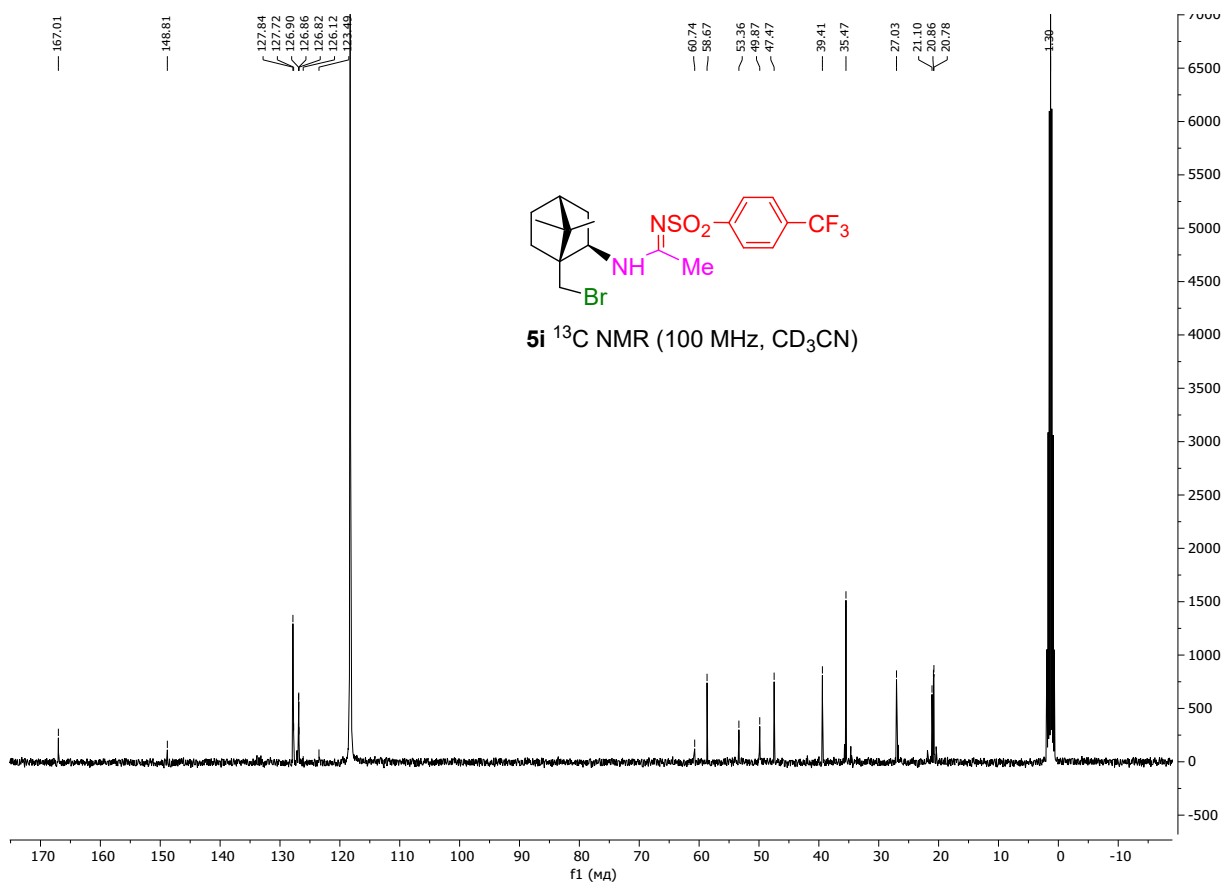

Figure S50.  $^{19}\text{F}$  NMR spectrum of compound **5i**

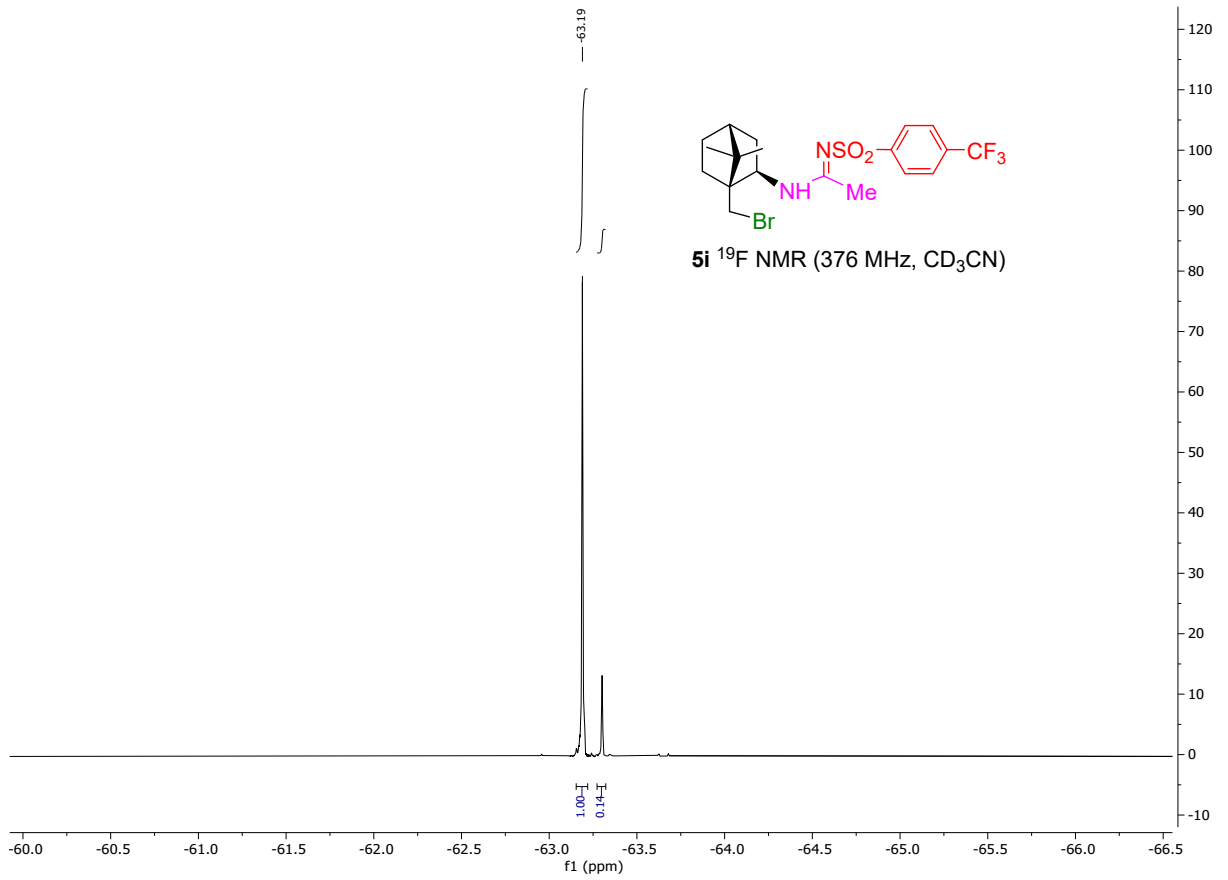

Figure S51.  $^1\text{H}$  NMR spectrum of compound **6**

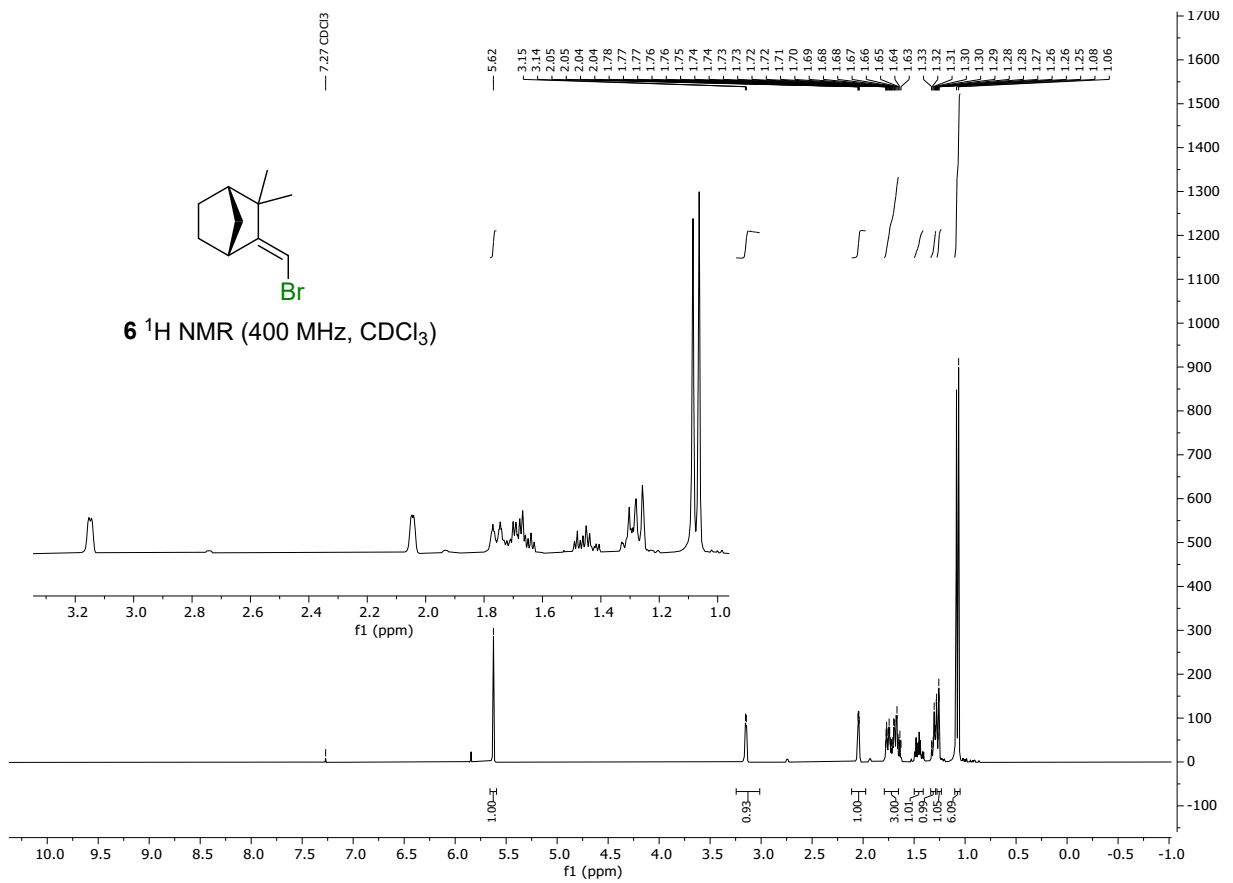

Figure S52.  $^{13}\text{C}$  NMR spectrum of compound **6**

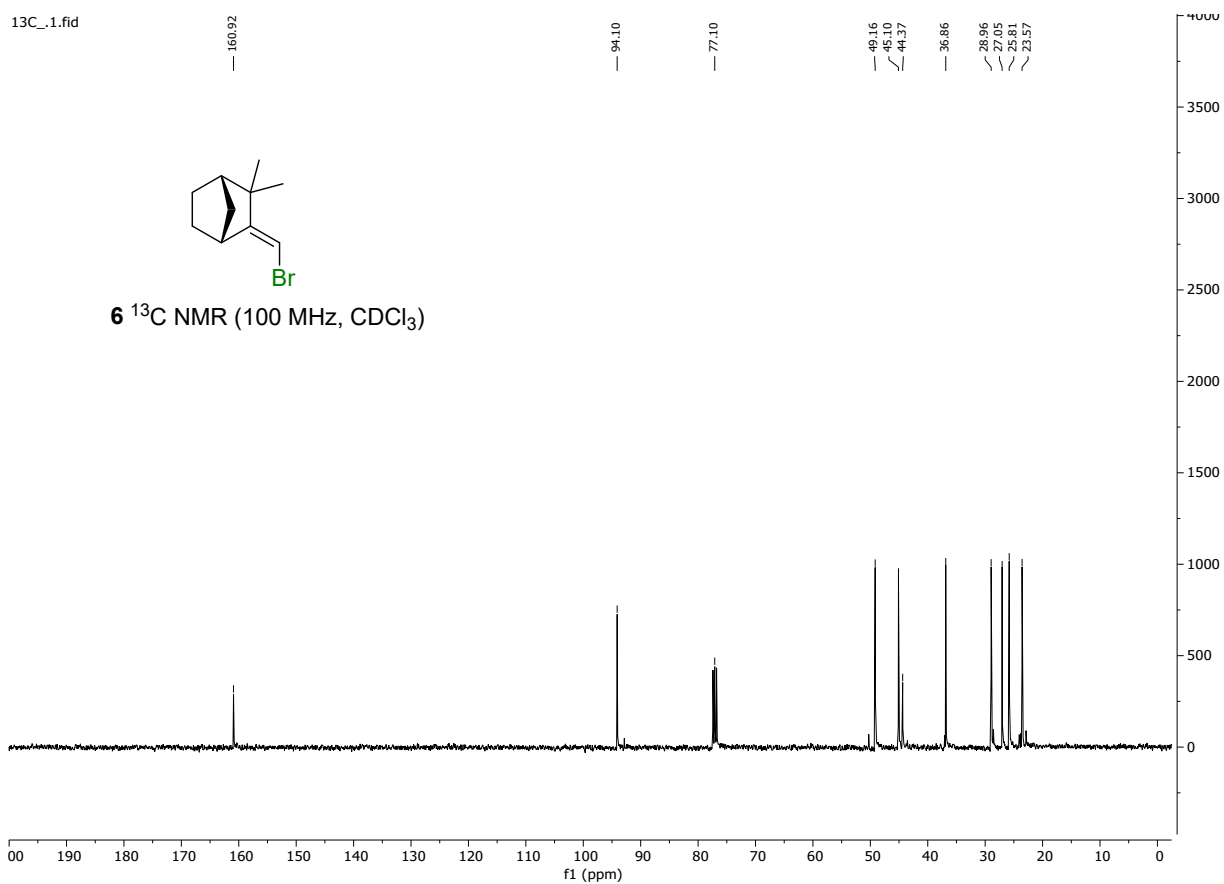

Figure S53.  $^1\text{H}$  NMR spectrum of compound **7a**

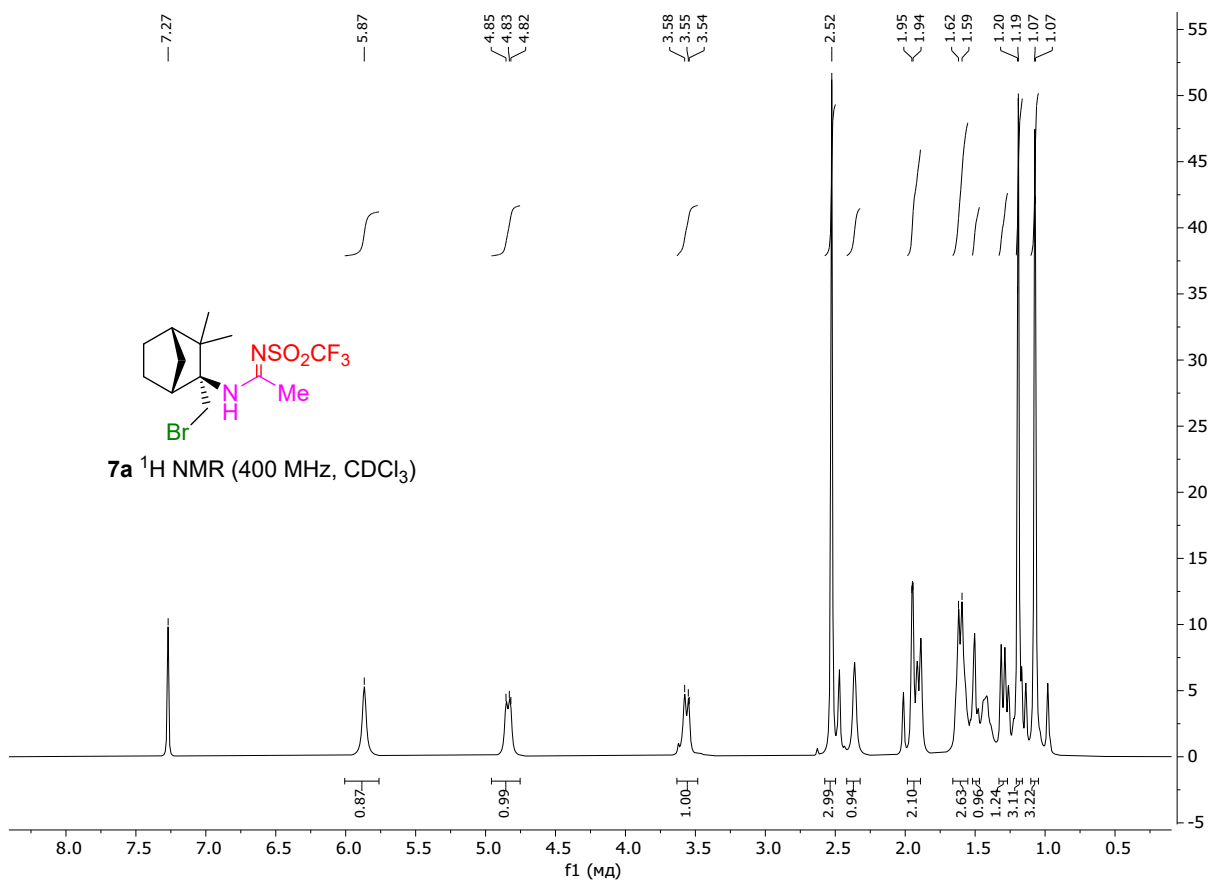

Figure S54.  $^{13}\text{C}$  NMR spectrum of compound 7a

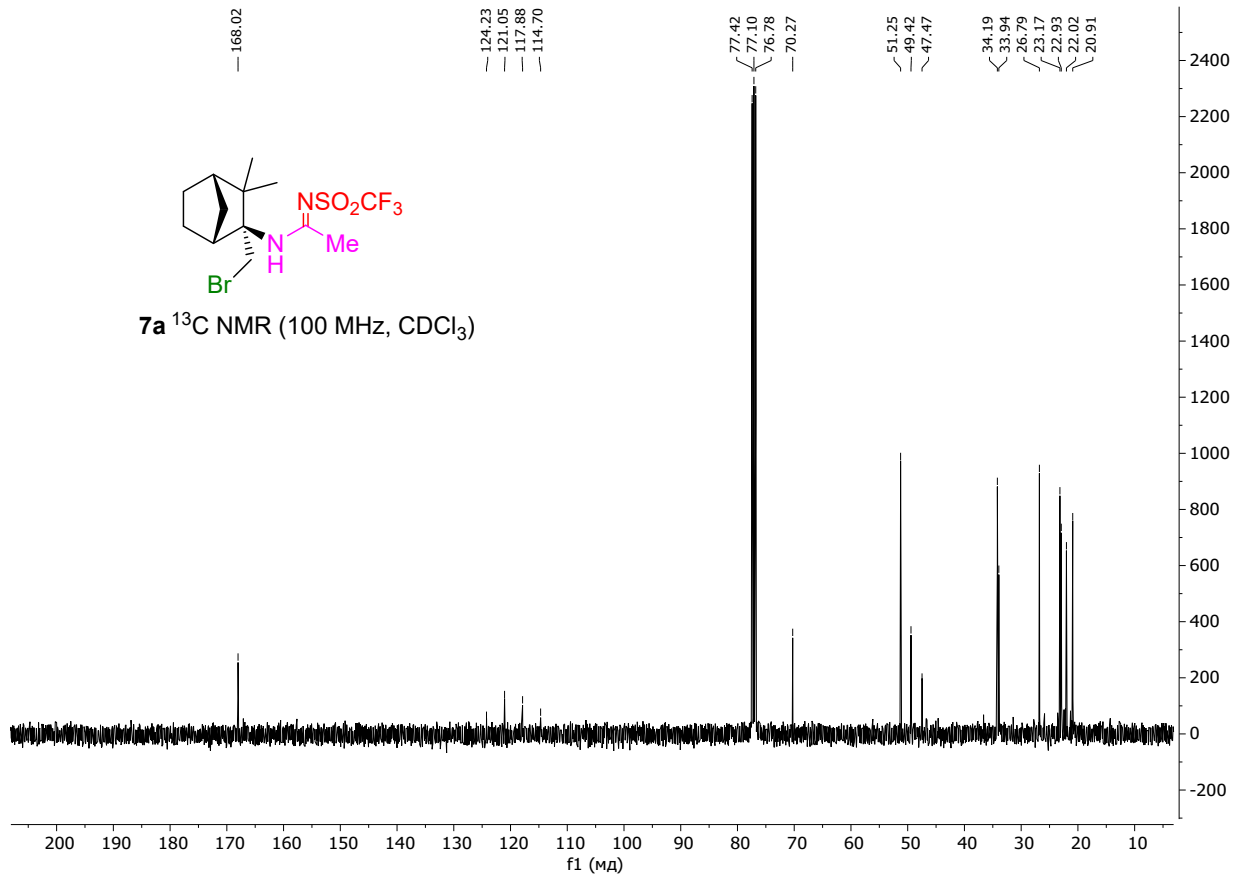

Figure S55.  $^{19}\text{F}$  NMR spectrum of compound 7a

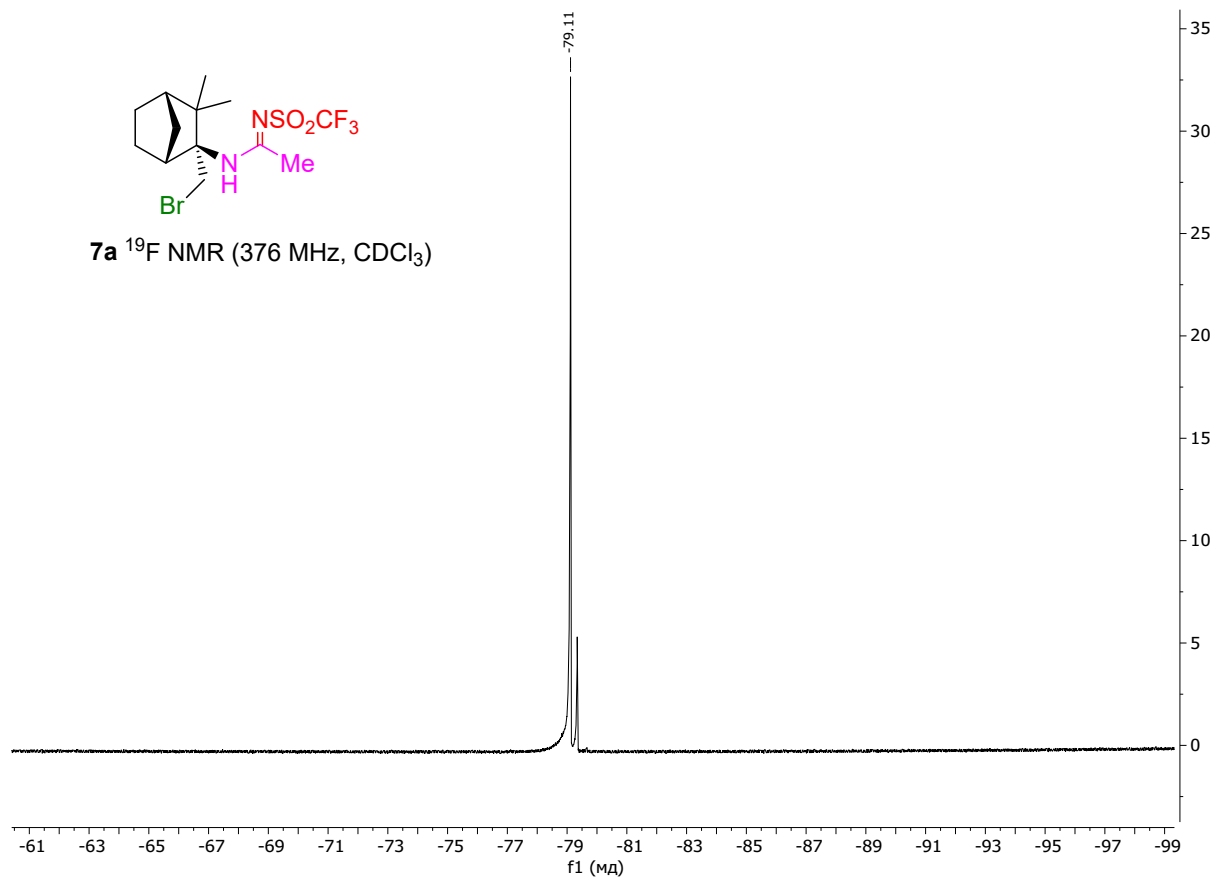



Figure S56. <sup>1</sup>H NMR spectrum of compound 7b

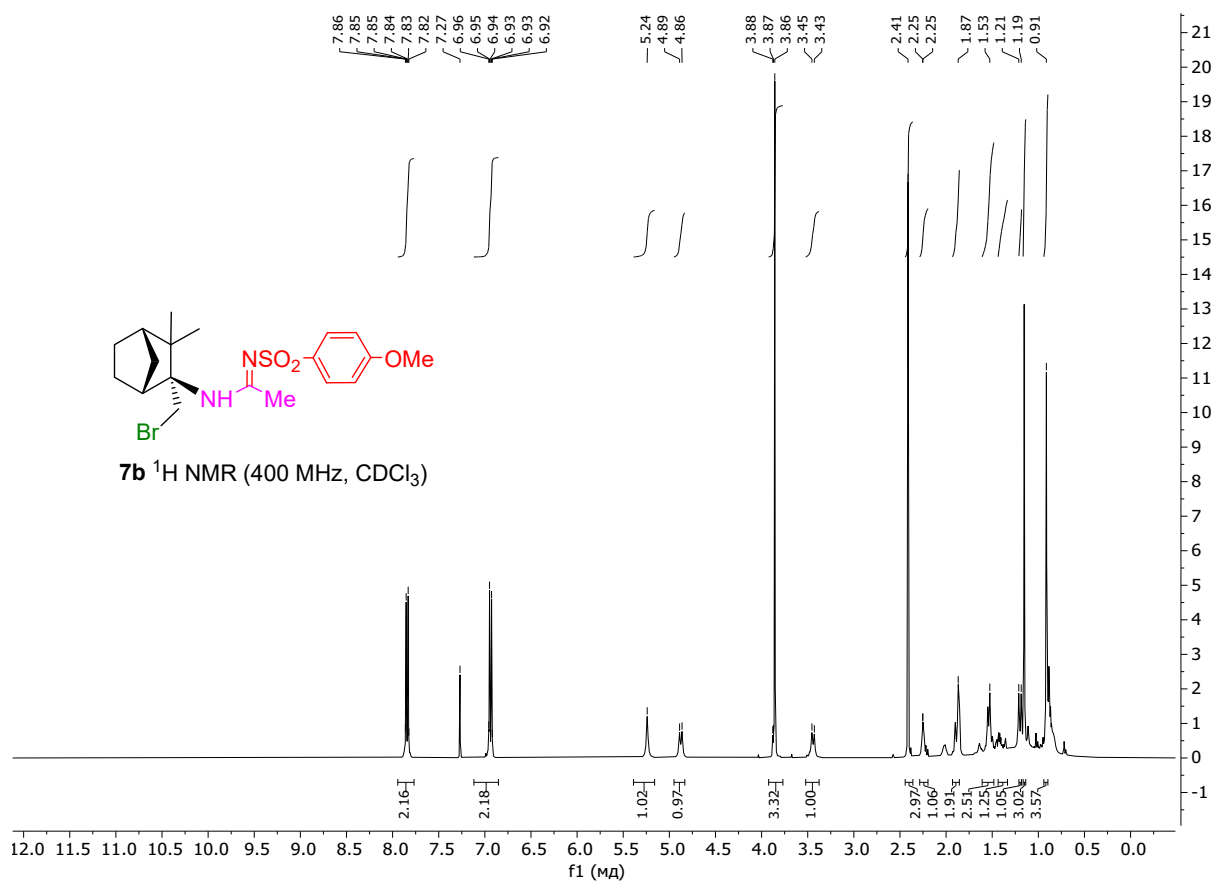

Figure S57. <sup>13</sup>C NMR spectrum of compound 7b

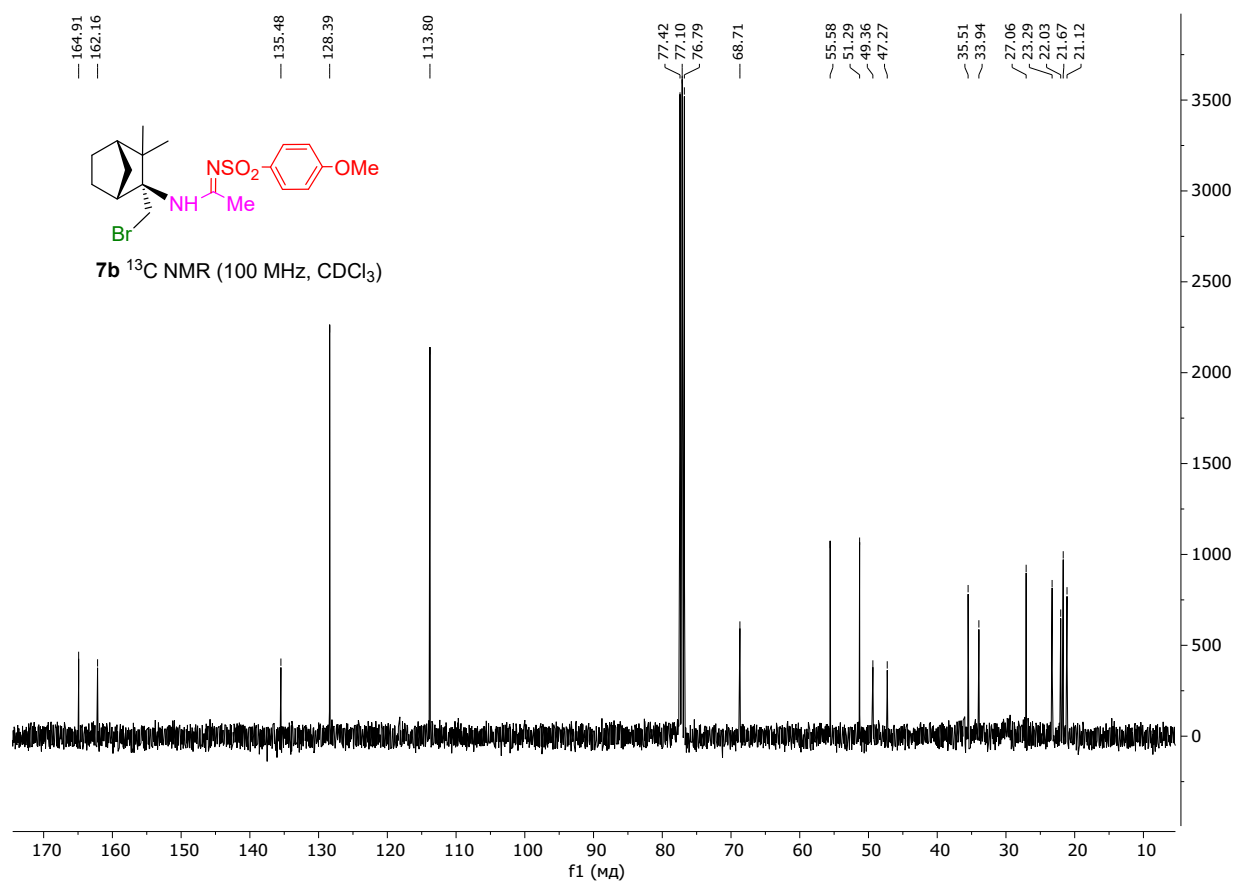

Figure S58.  $^1\text{H}$  NMR spectrum of compound **7c**

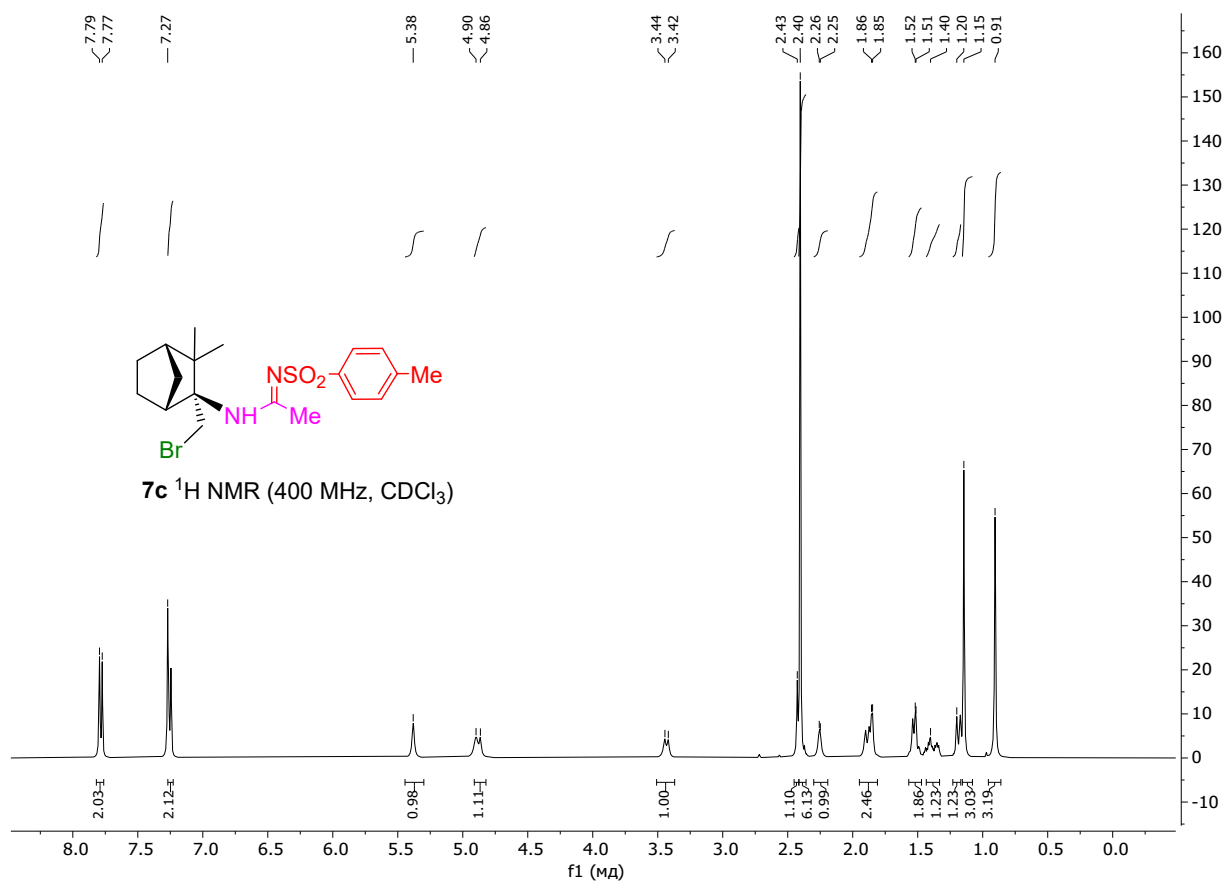

Figure S59.  $^{13}\text{C}$  NMR spectrum of compound **7c**

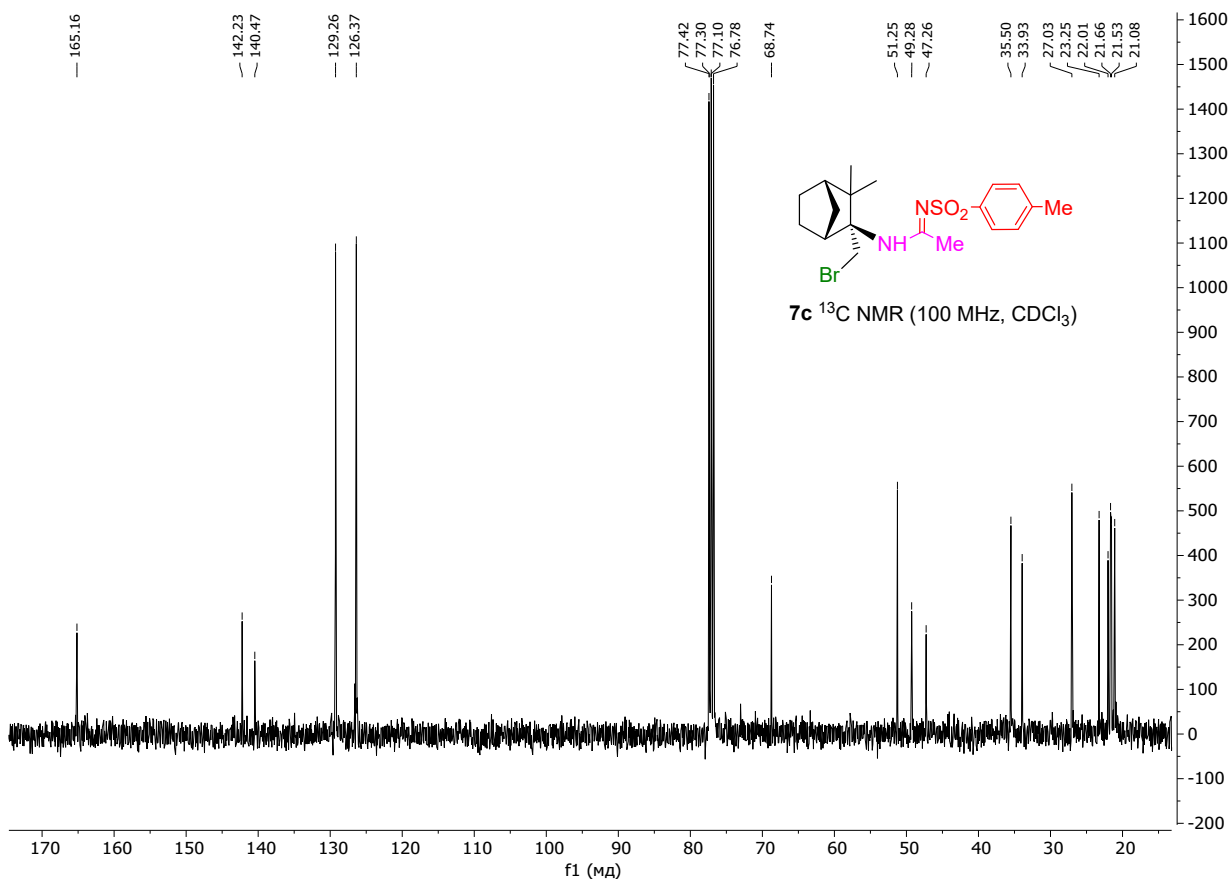

Figure S60.  $^1\text{H}$  NMR spectrum of compound **7d**

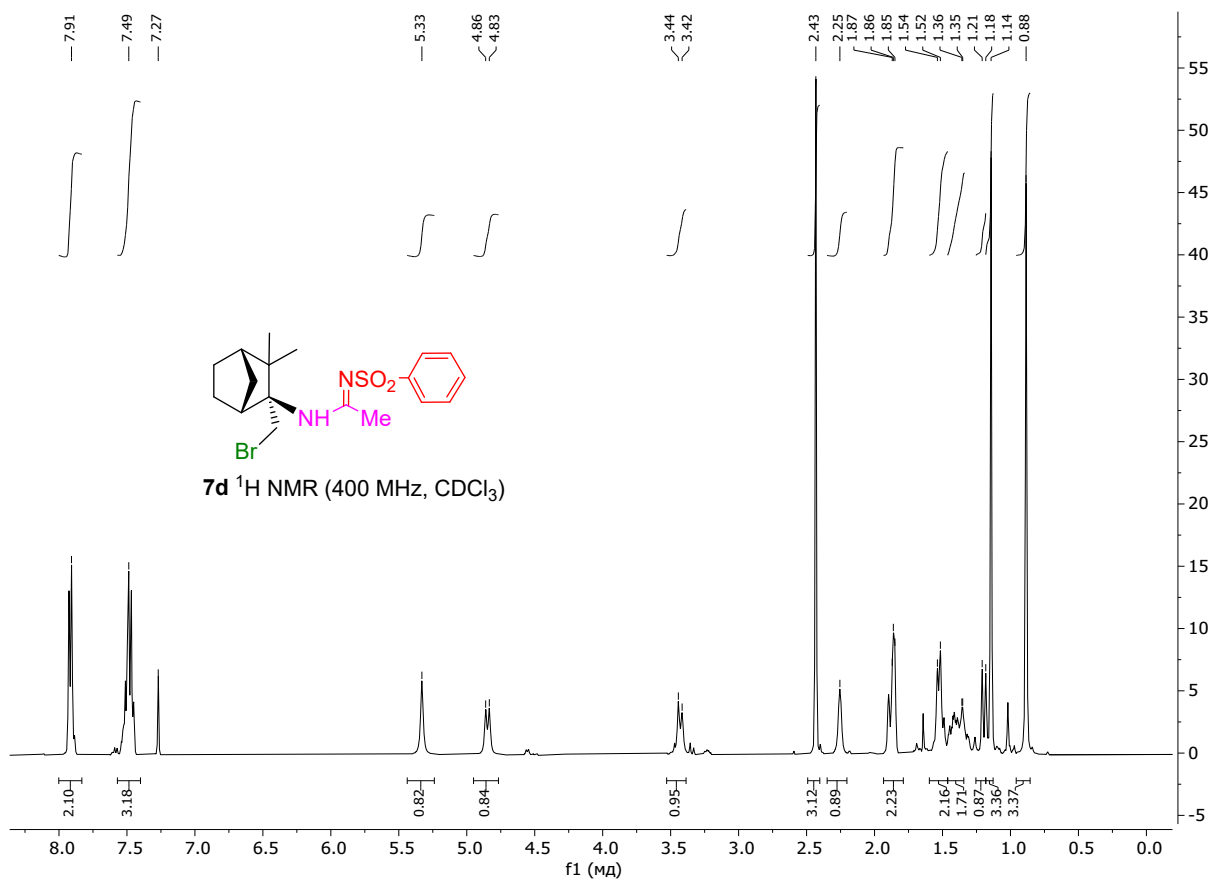

Figure S61.  $^{13}\text{C}$  NMR spectrum of compound 7d

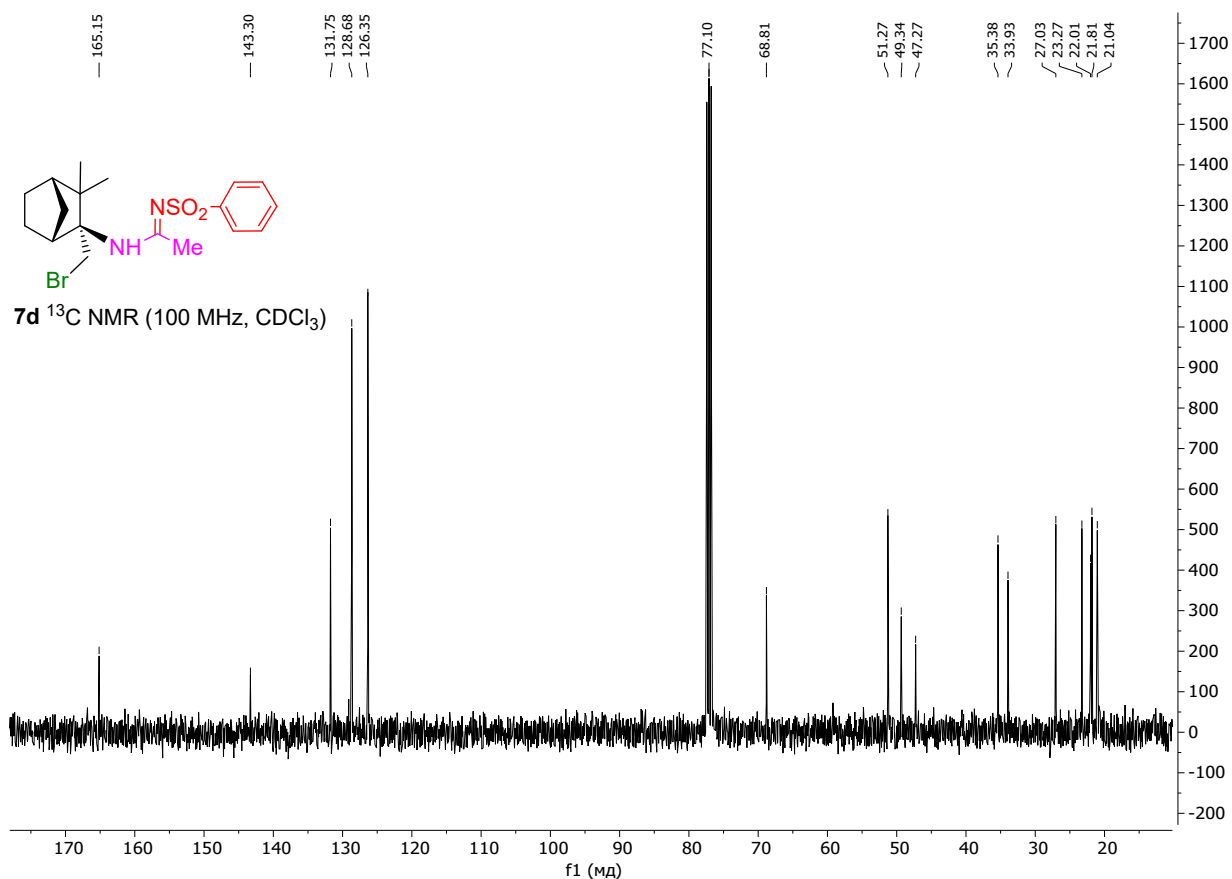

Figure S62.  $^1\text{H}$  NMR spectrum of compound 7e

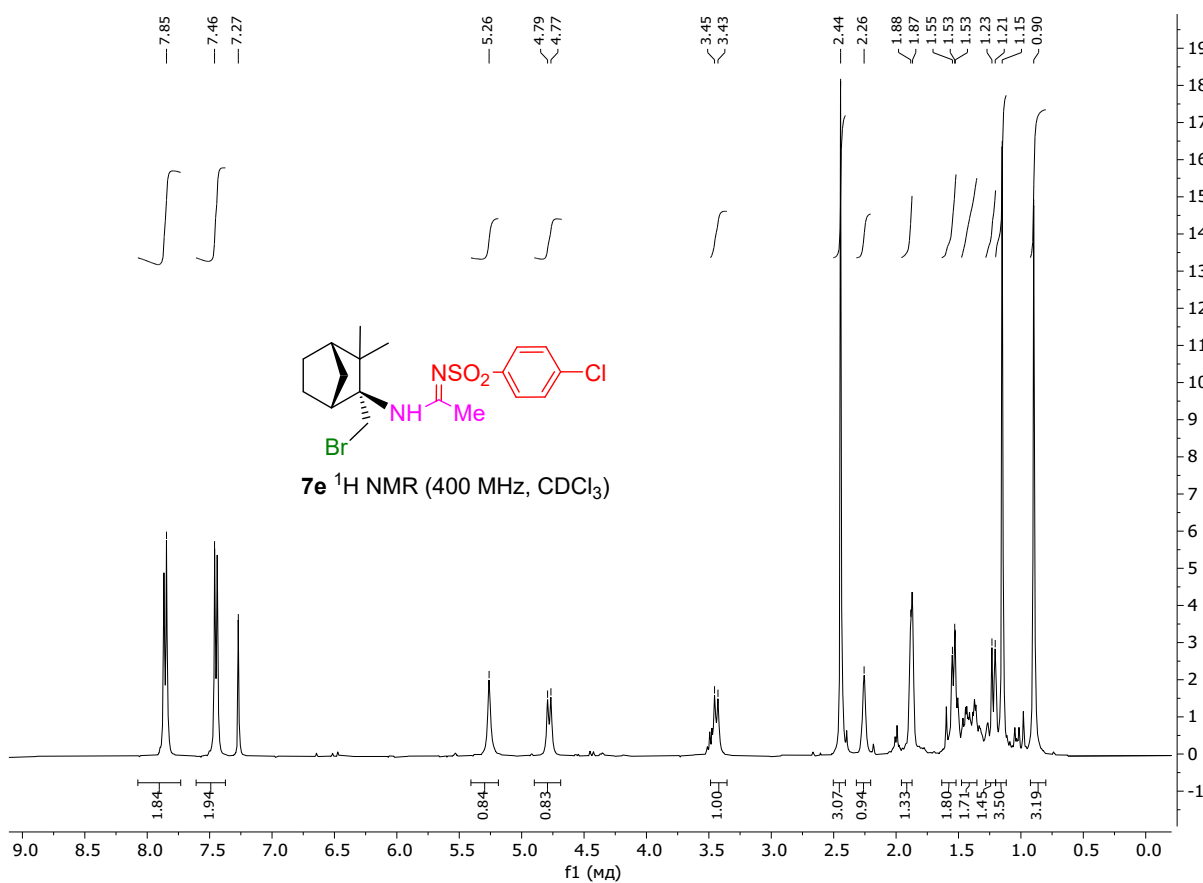

Figure S63.  $^{13}\text{C}$  NMR spectrum of compound **7e**

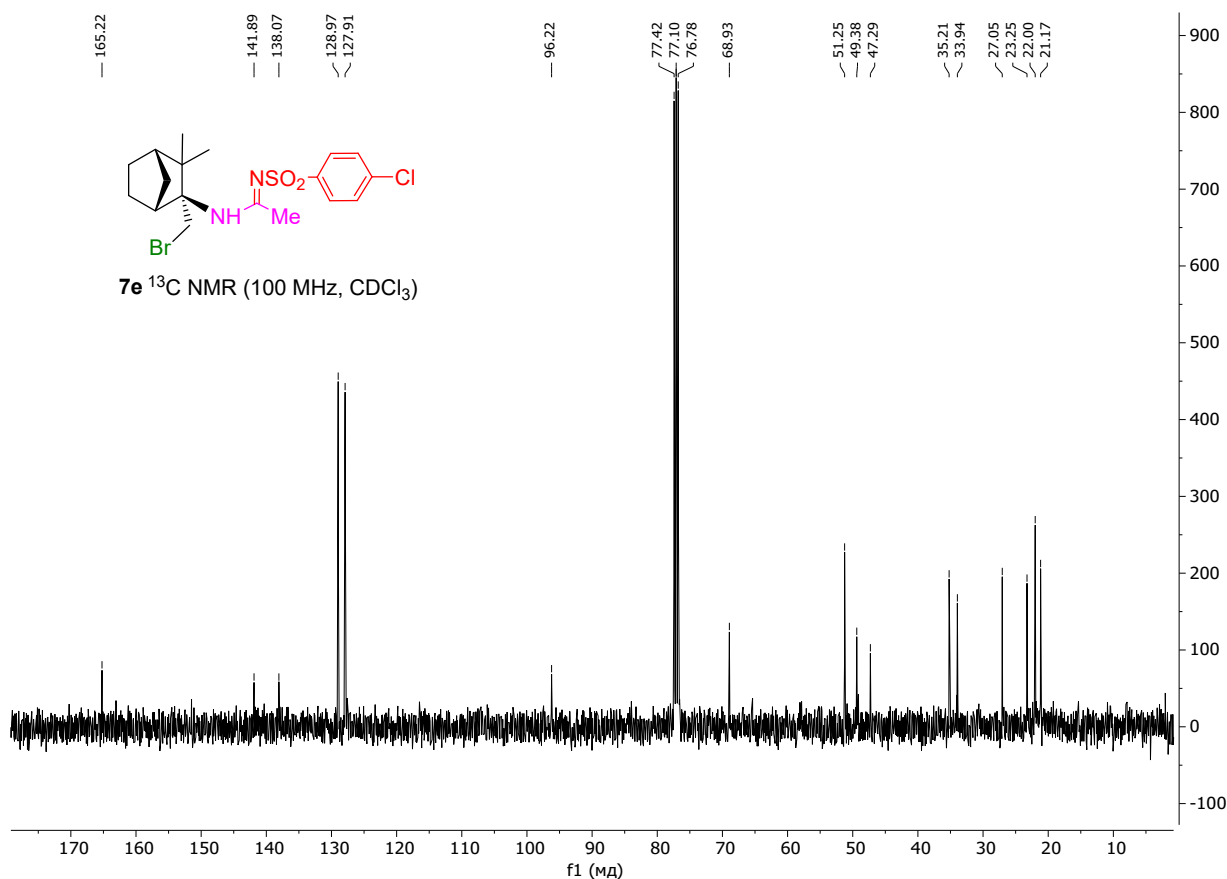

Figure S64.  $^1\text{H}$  NMR spectrum of compound **7f**

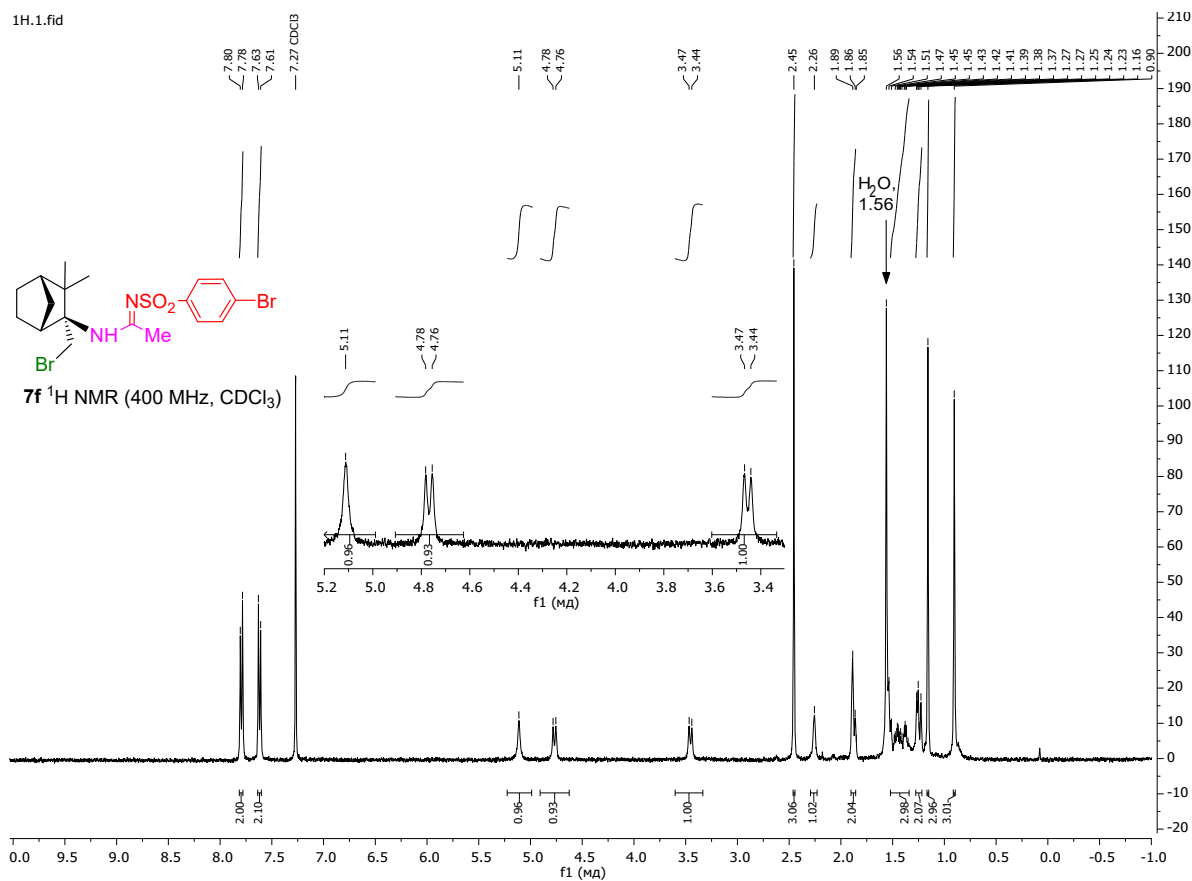

**Figure S65.**  $^{13}\text{C}$  NMR spectrum of compound **7f**

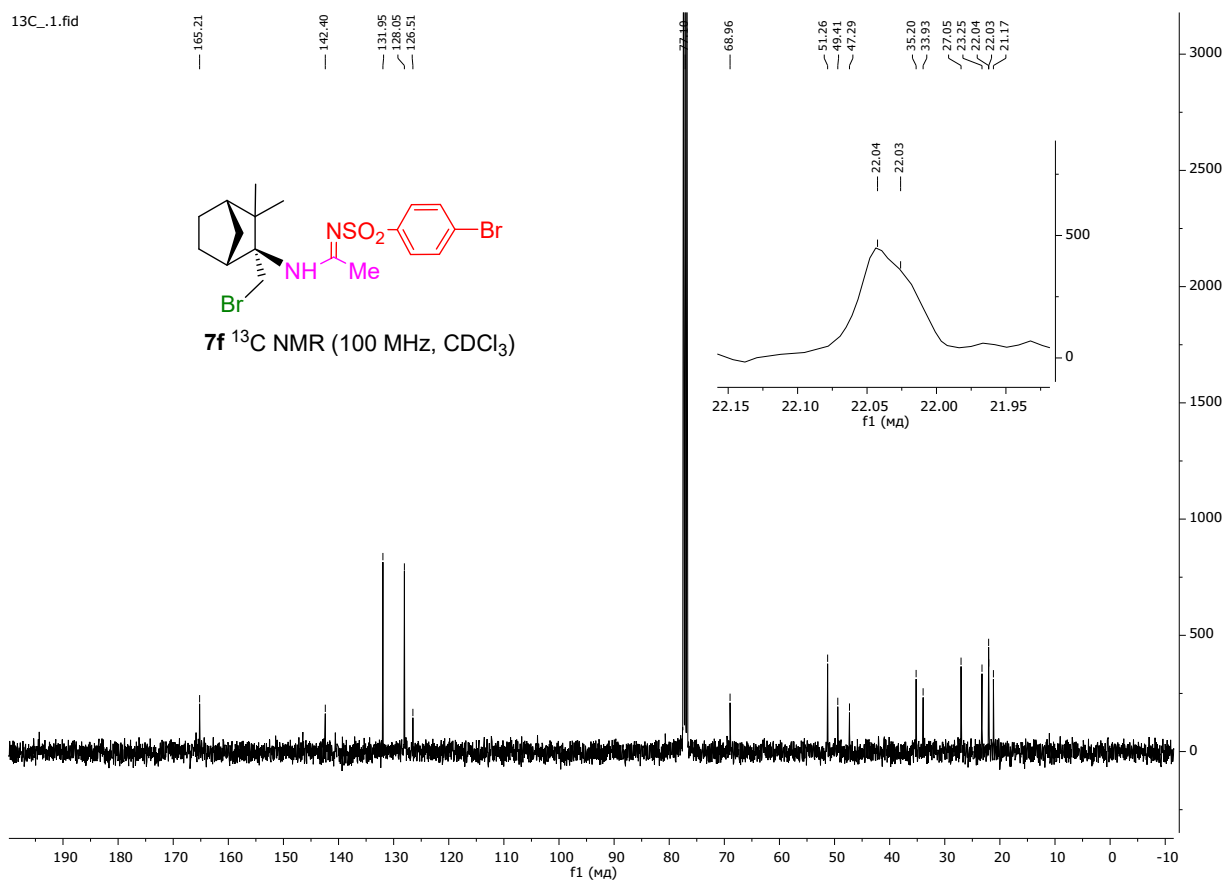

**Figure S66.**  $^1\text{H}$  NMR spectrum of compound **7g**

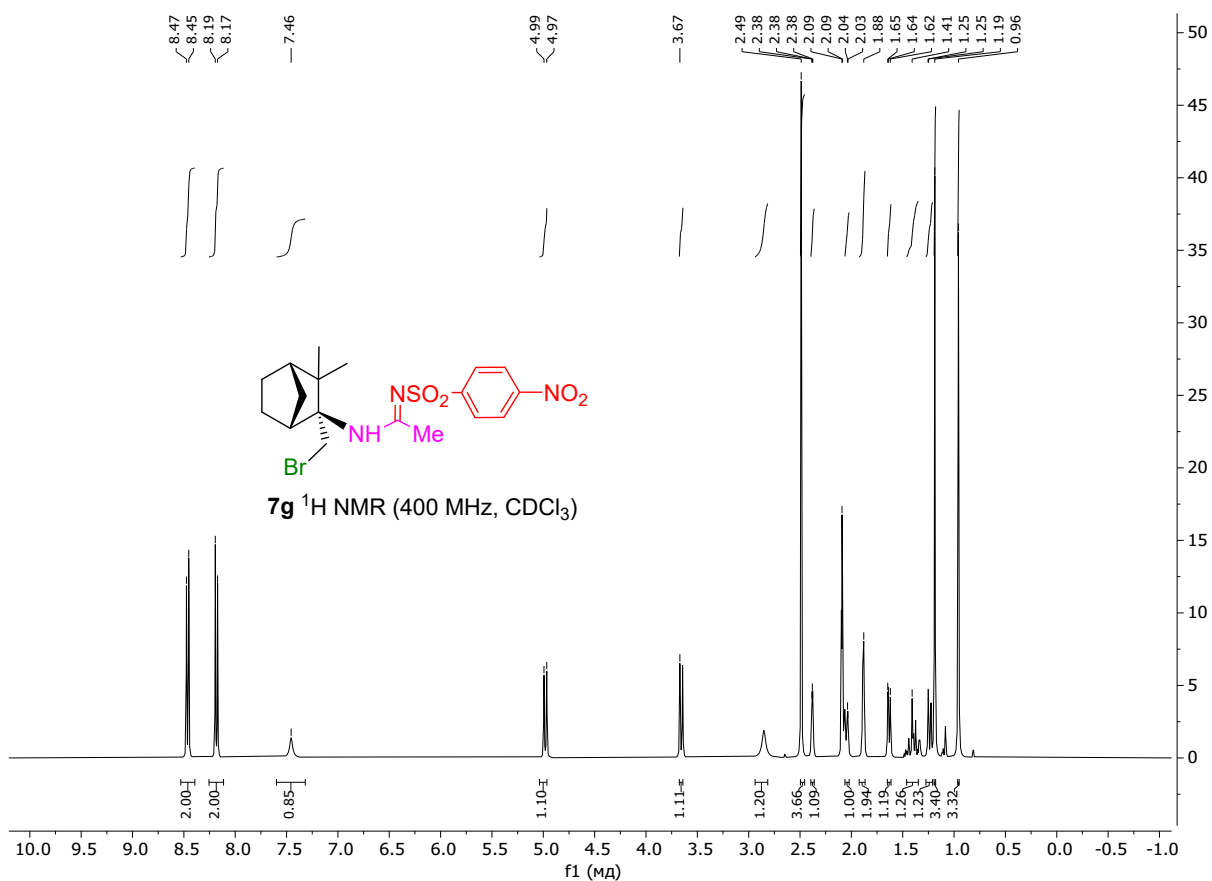

**Figure S67.**  $^{13}\text{C}$  NMR spectrum of compound **7g**

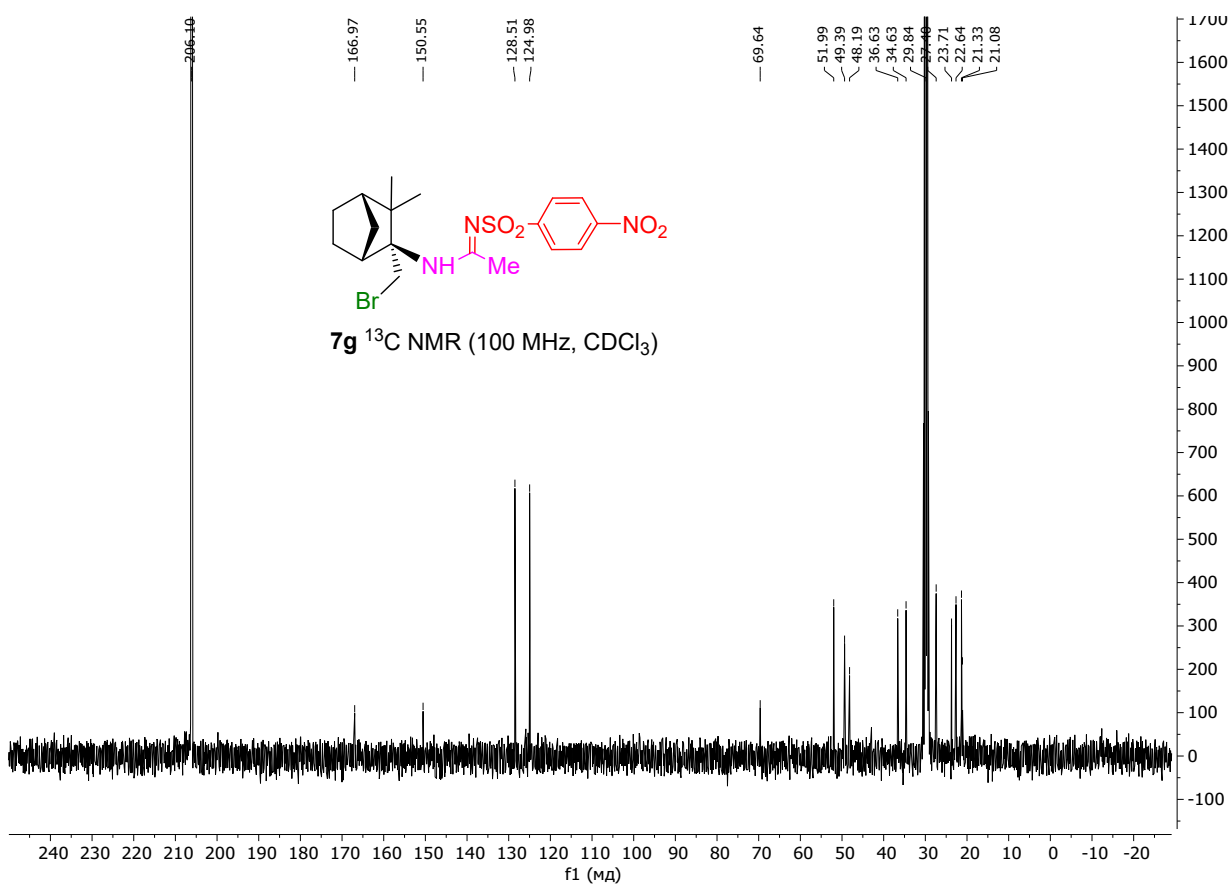

**Figure S68.**  $^1\text{H}$  NMR spectrum of compound **7h**





Figure S70.  $^{19}\text{F}$  NMR spectrum of compound 7h

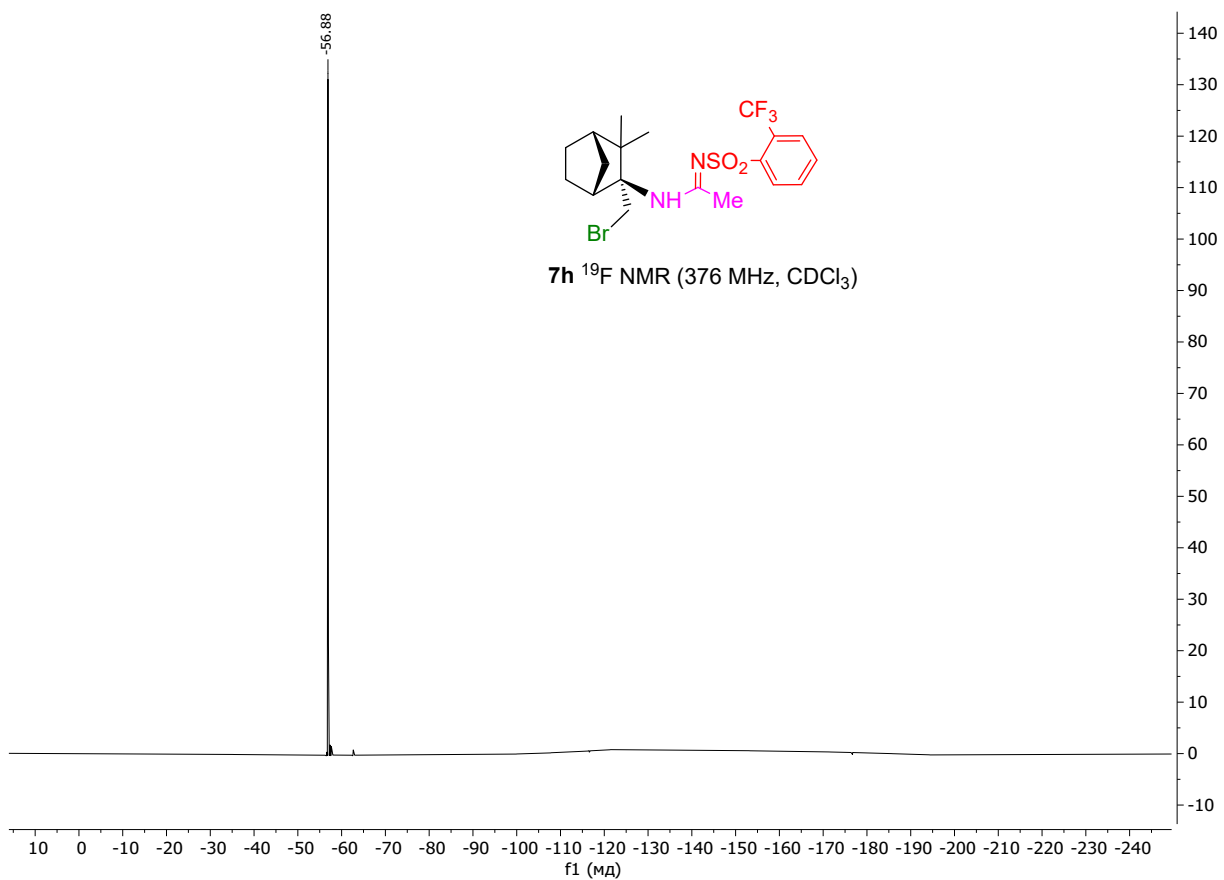

Figure S71.  $^1\text{H}$  NMR spectrum of compound 7i

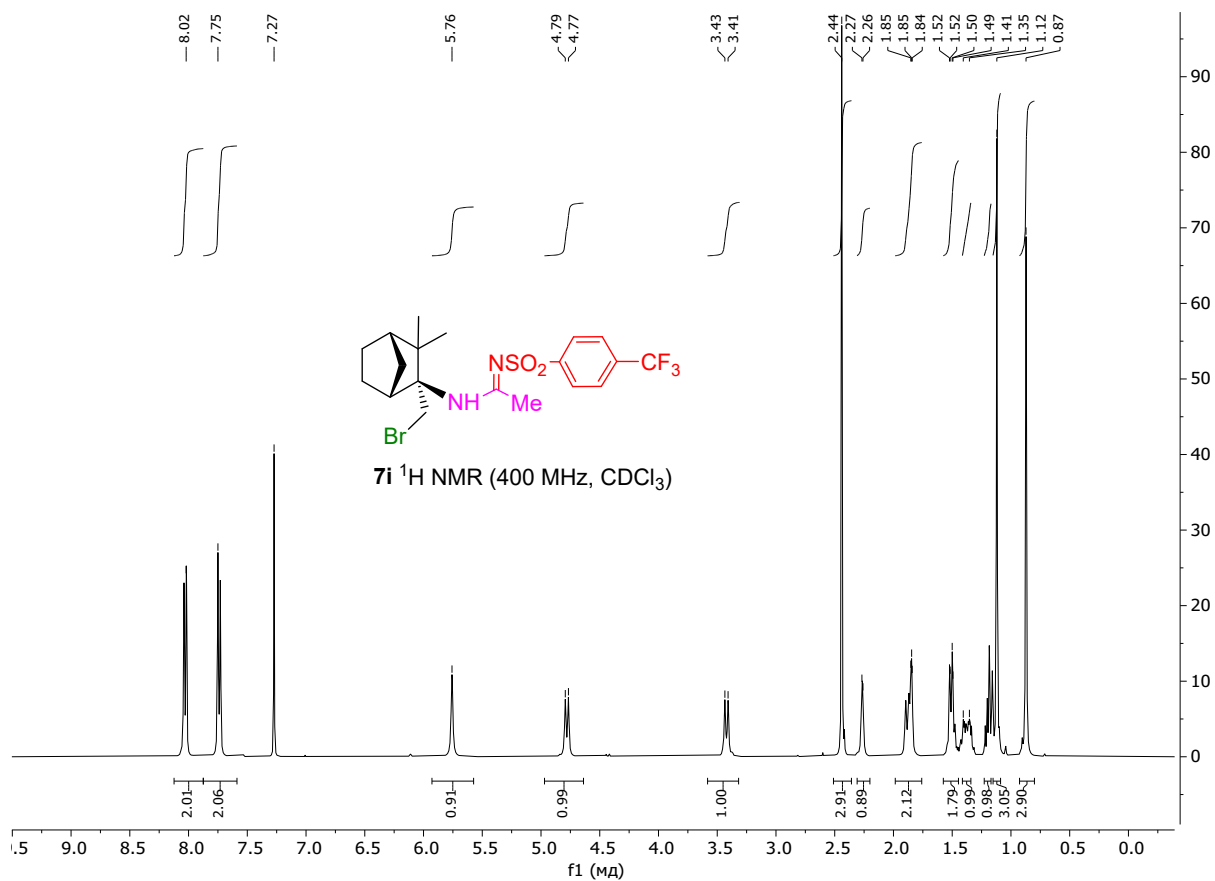

Figure S72.  $^{13}\text{C}$  NMR spectrum of compound **7i**

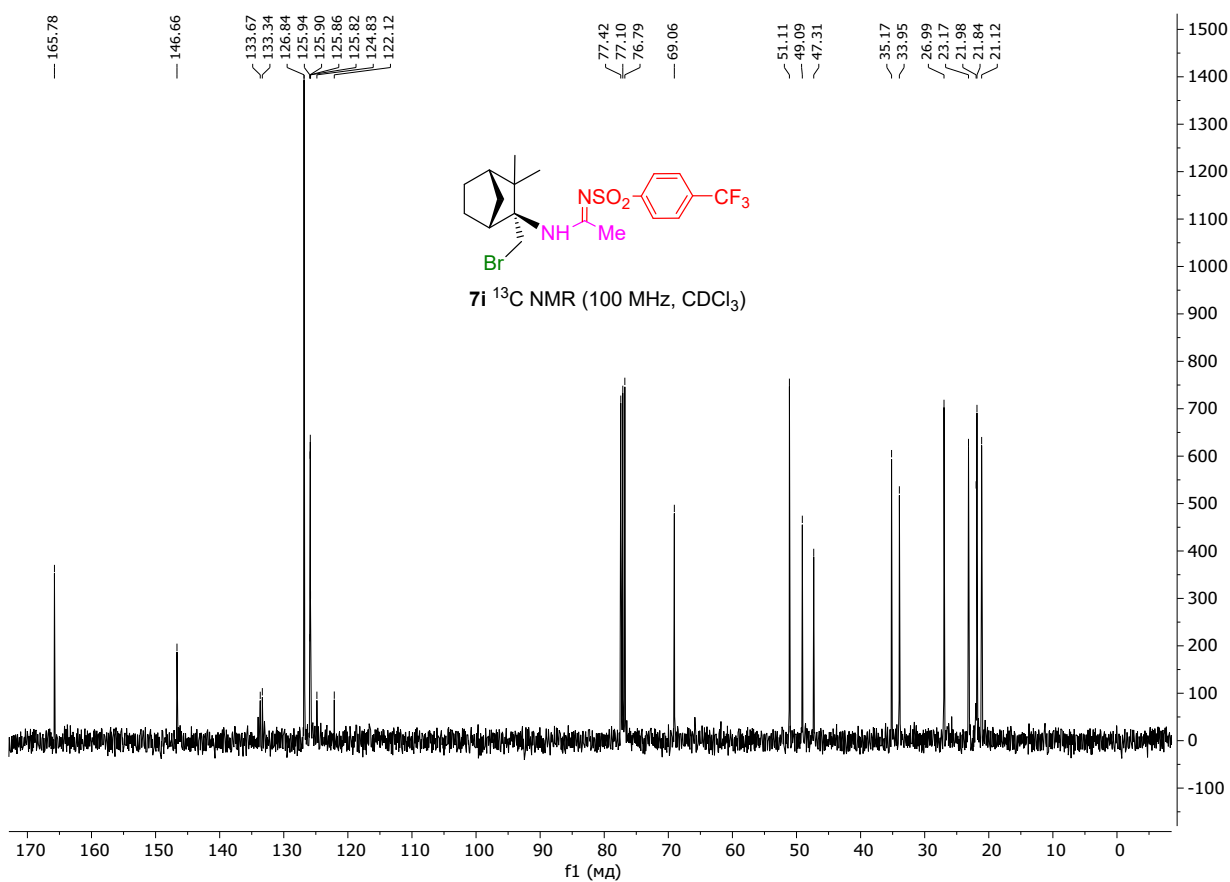

Figure S73.  $^{19}\text{F}$  NMR spectrum of compound **7i**

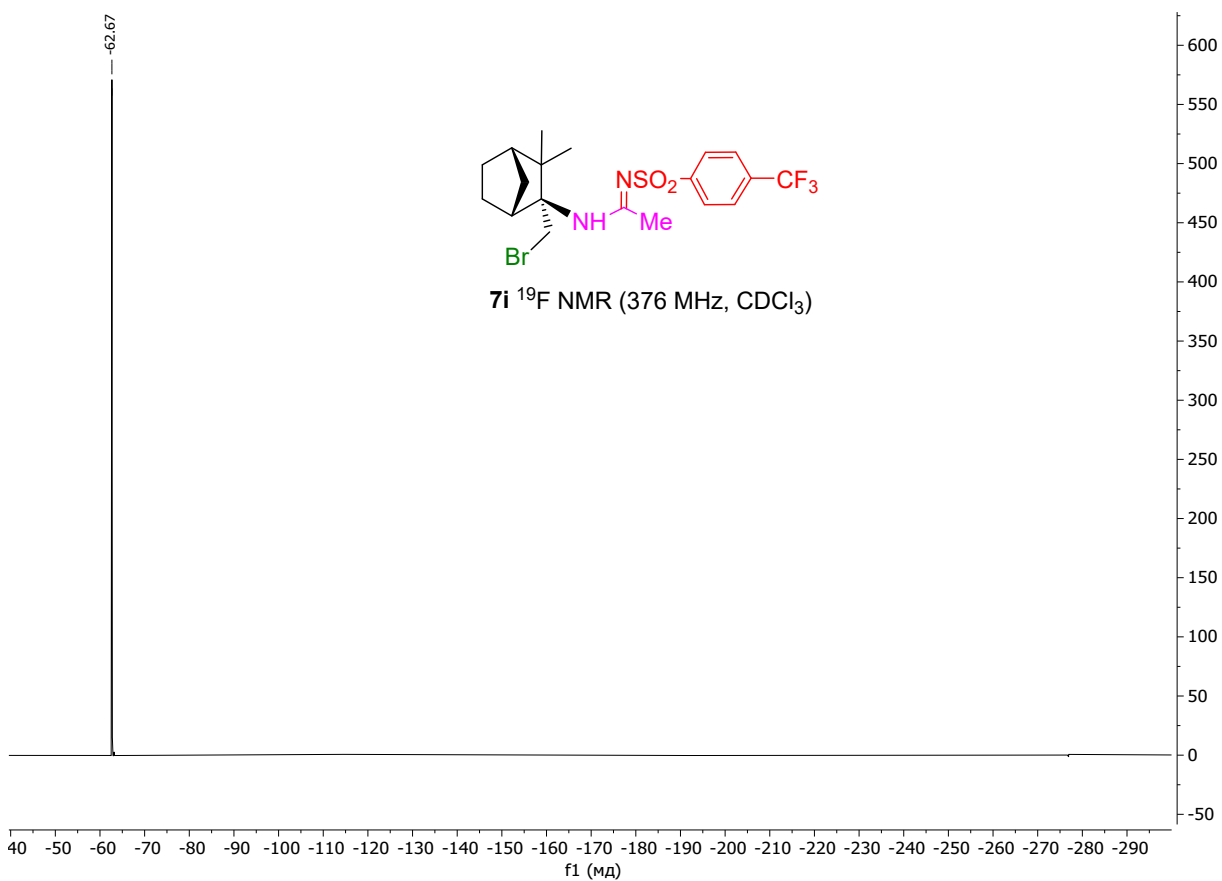

Figure S74. <sup>1</sup>H NMR spectrum of compound 7j

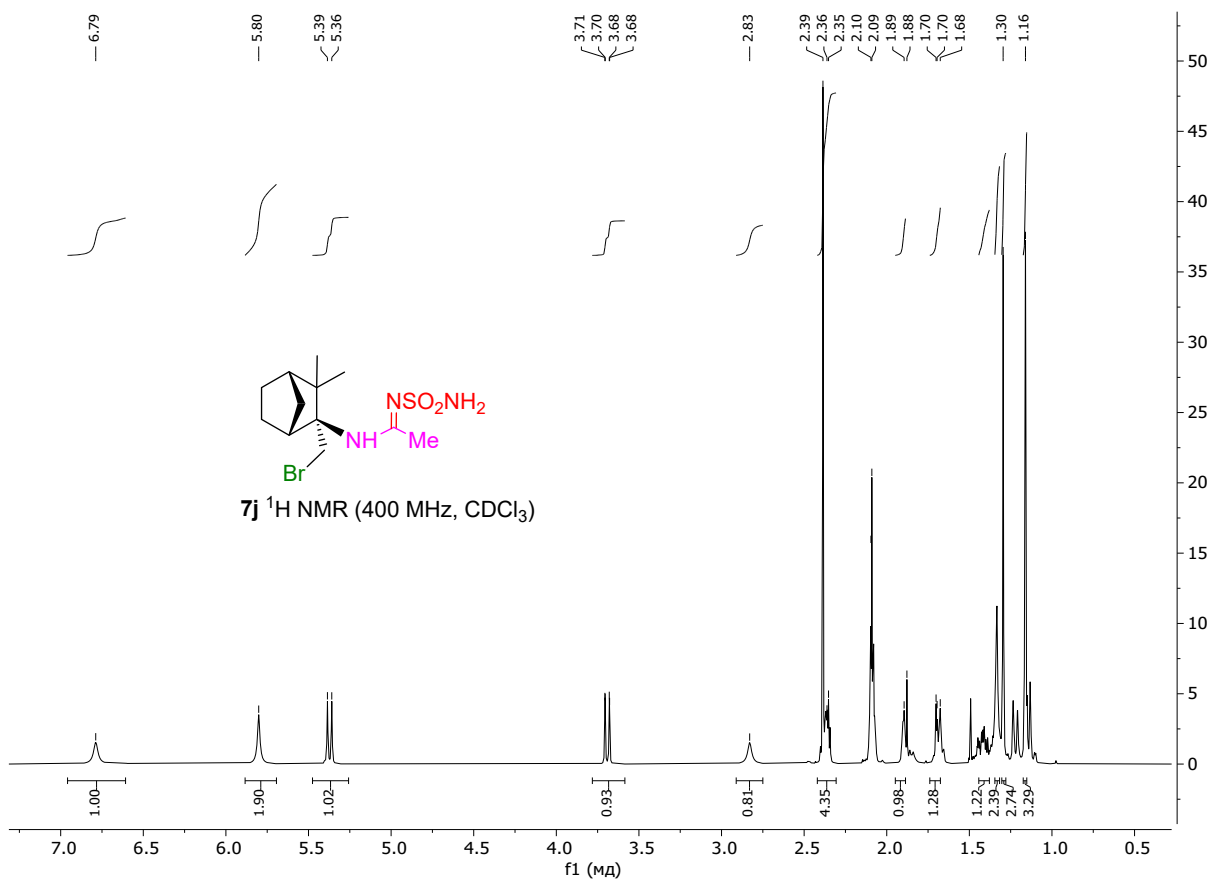

Figure S75. <sup>13</sup>C NMR spectrum of compound 7j

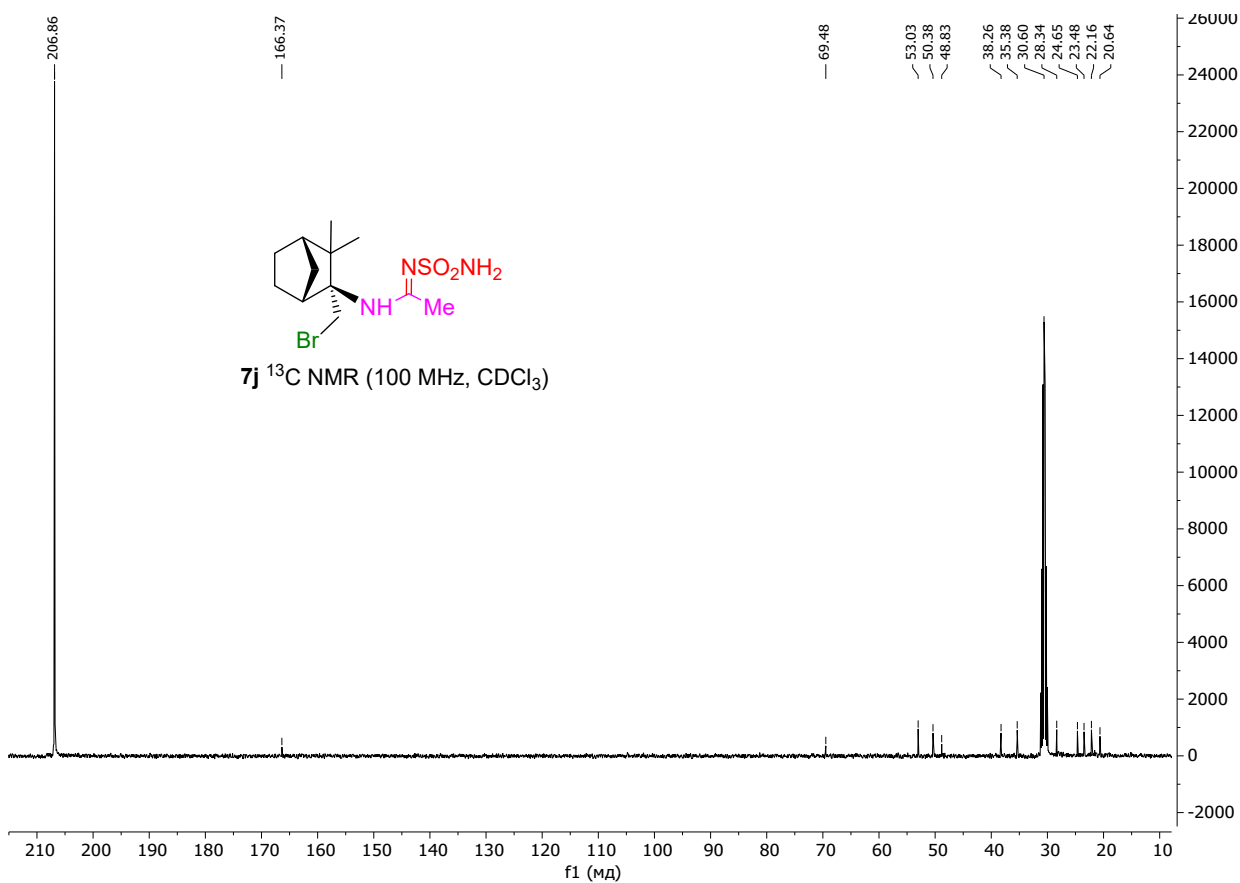

Figure S76.  $^1\text{H}$  NMR spectrum of compound 7k

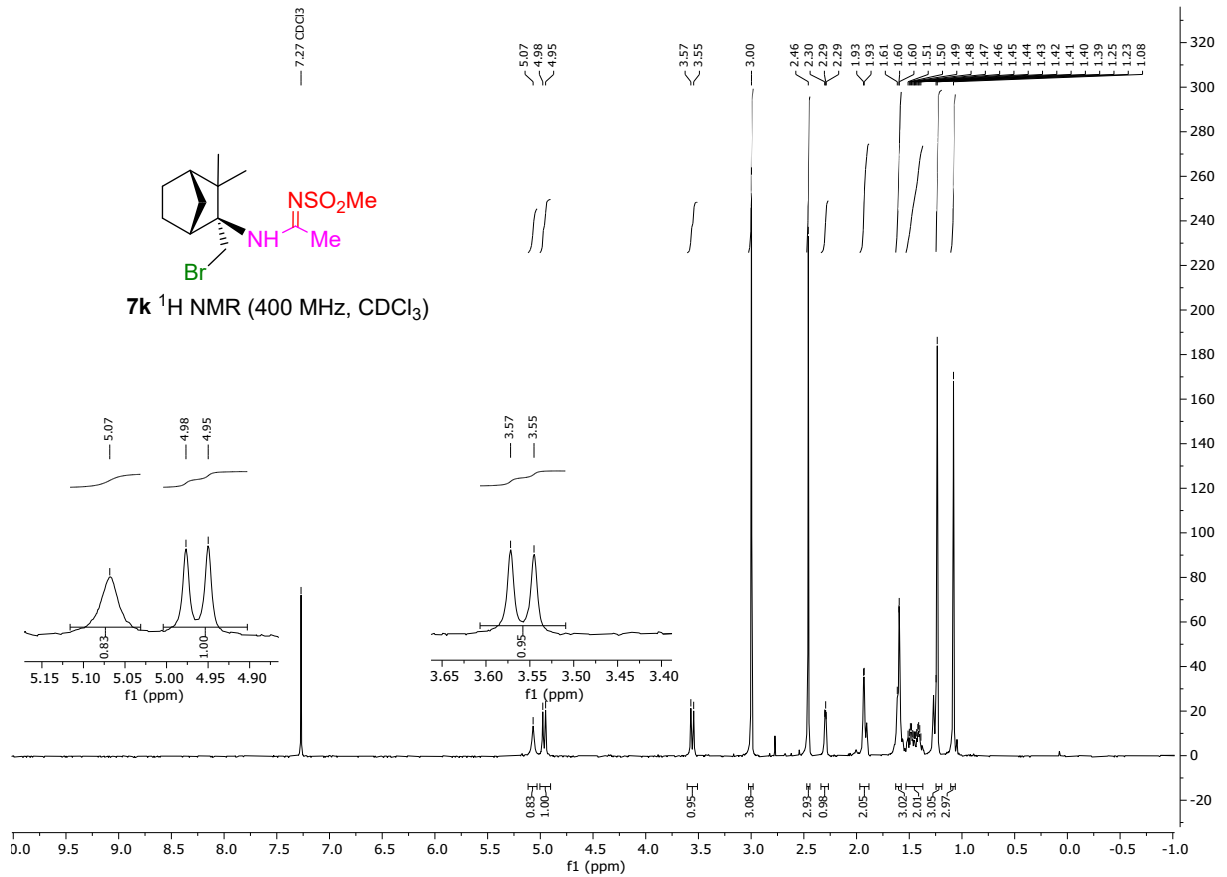

Figure S77.  $^{13}\text{C}$  NMR spectrum of compound 7k

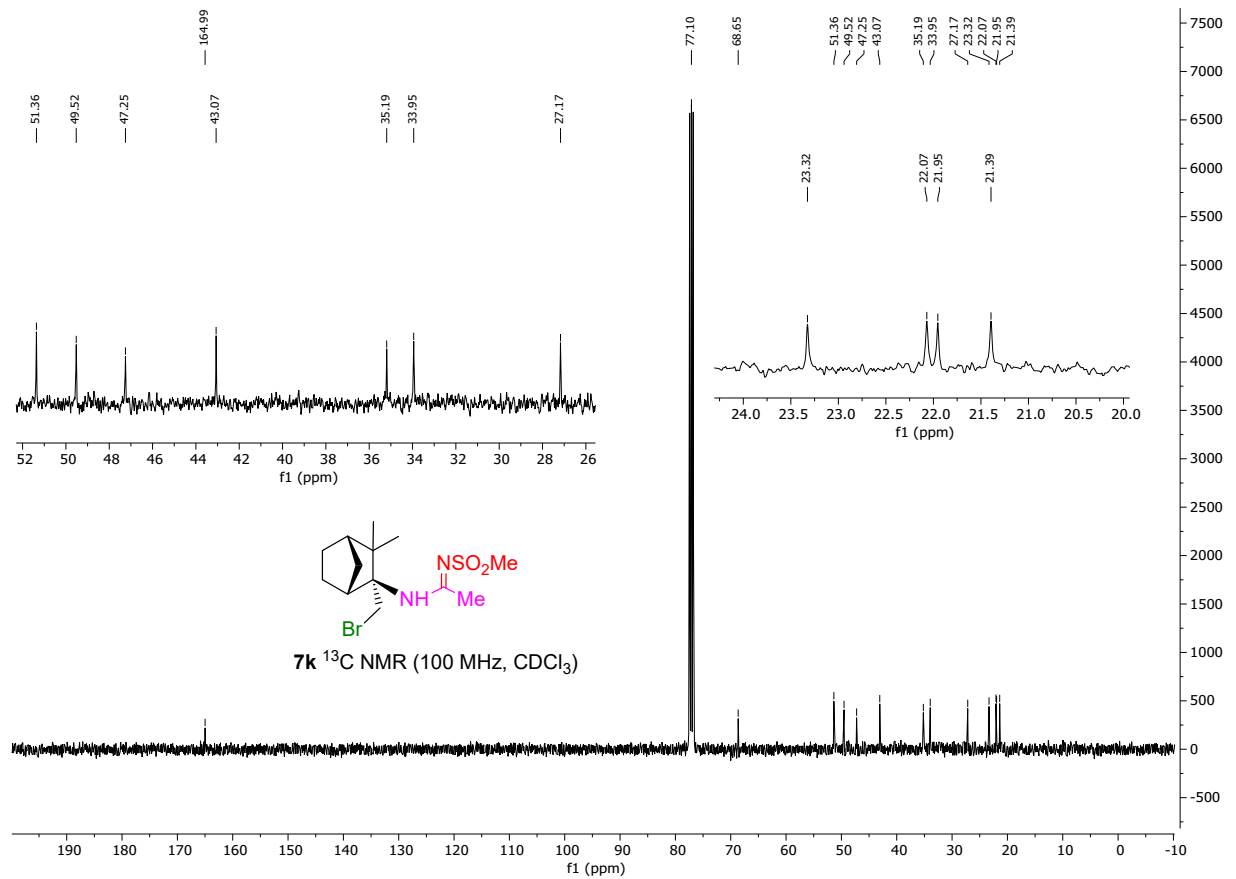

Figure S78. <sup>1</sup>H NMR spectrum of compound 8a

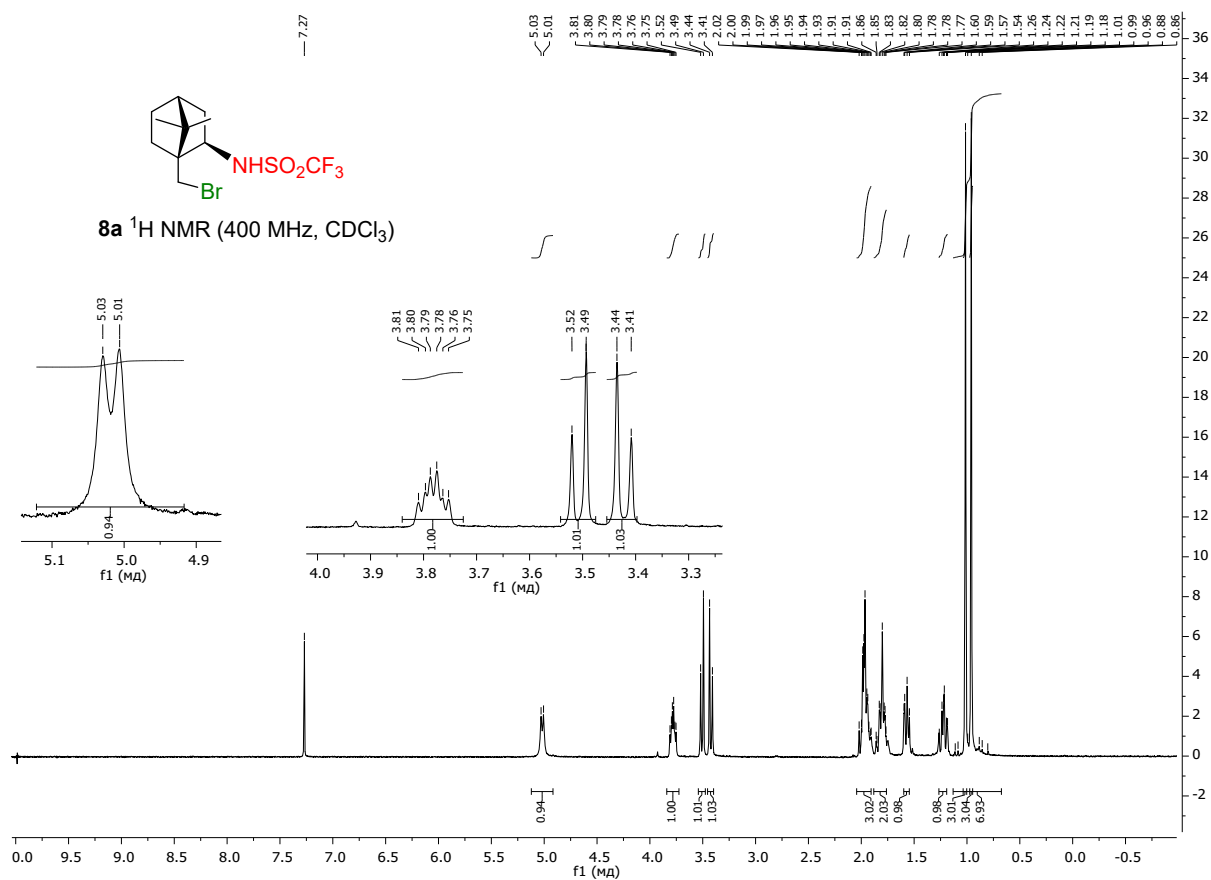

Figure S79. <sup>13</sup>C NMR spectrum of compound 8a

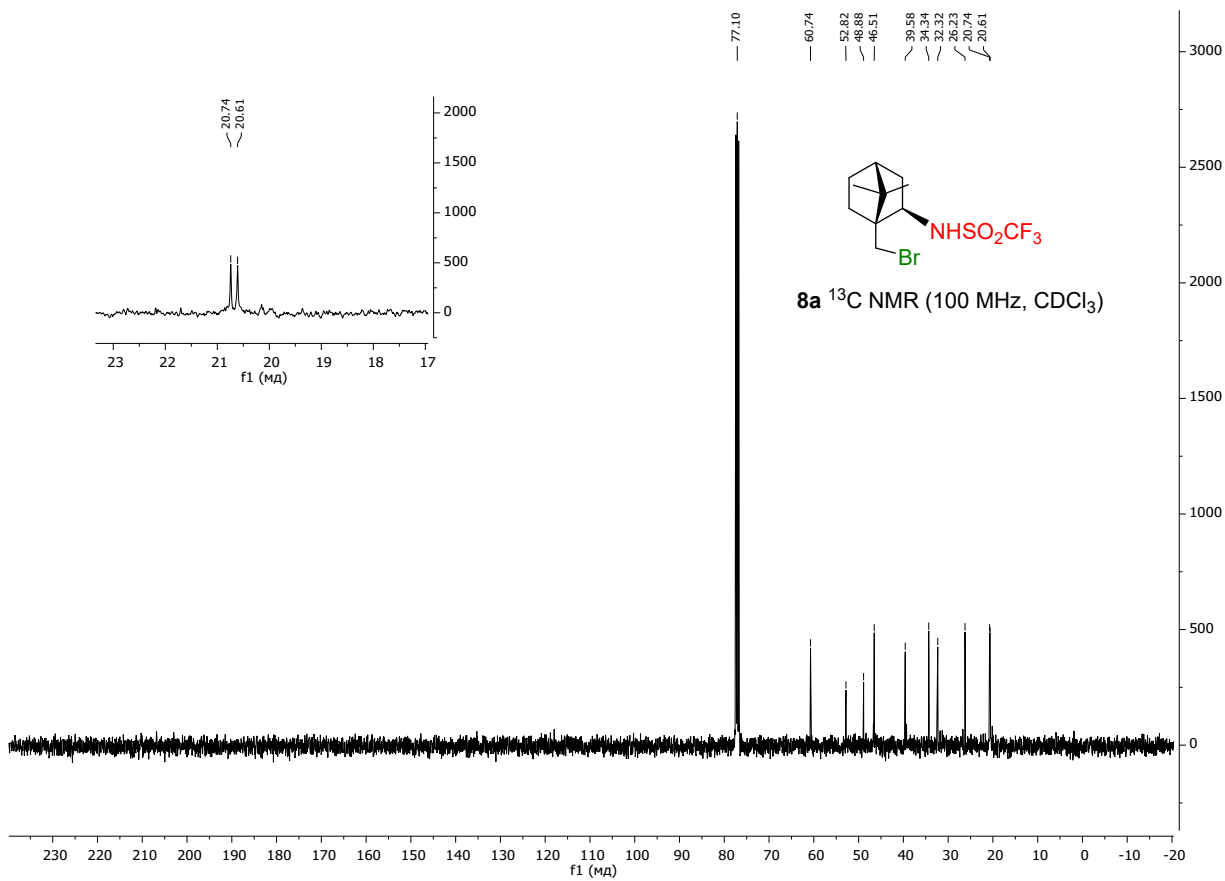

**Figure S80.**  $^{19}\text{F}$  NMR spectrum of compound **8a**

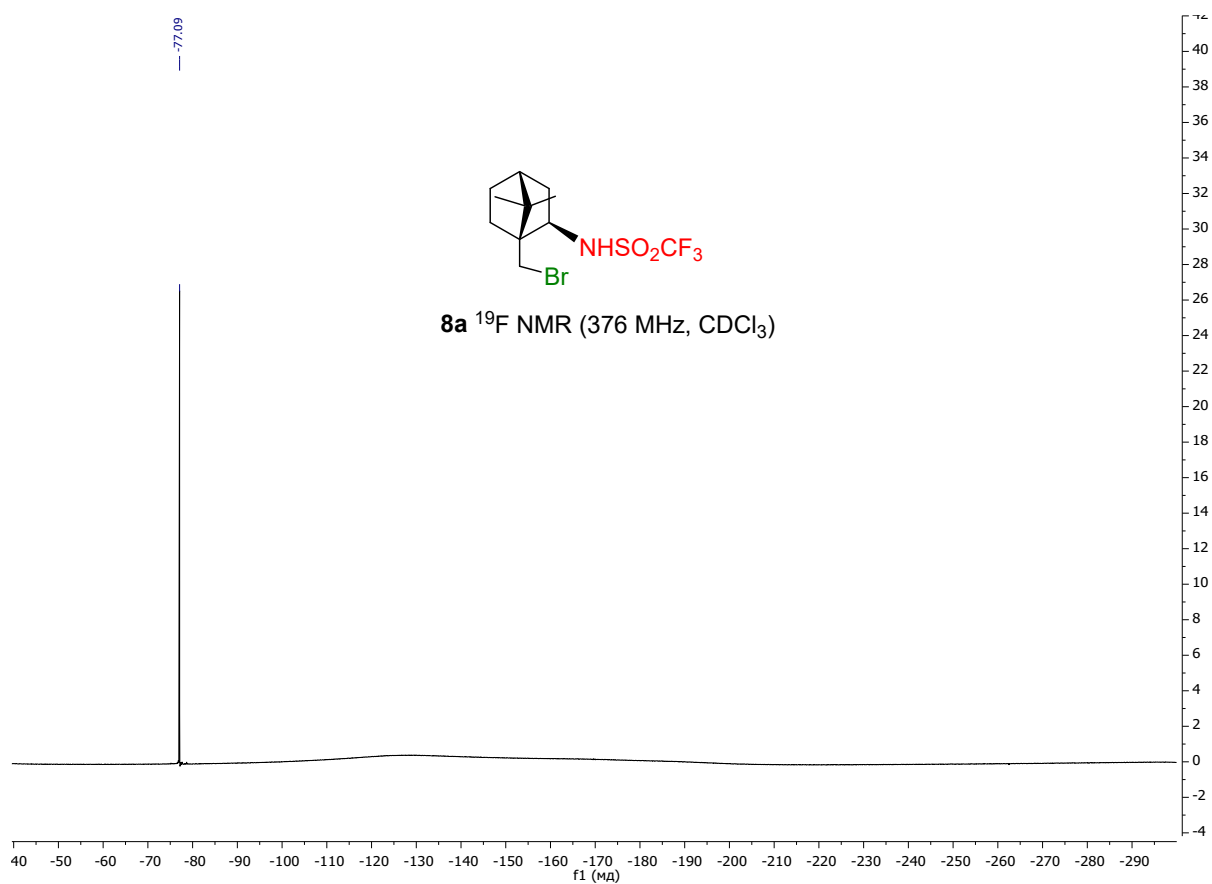

**Figure S81.**  $^1\text{H}$  NMR spectrum of compound **8b**

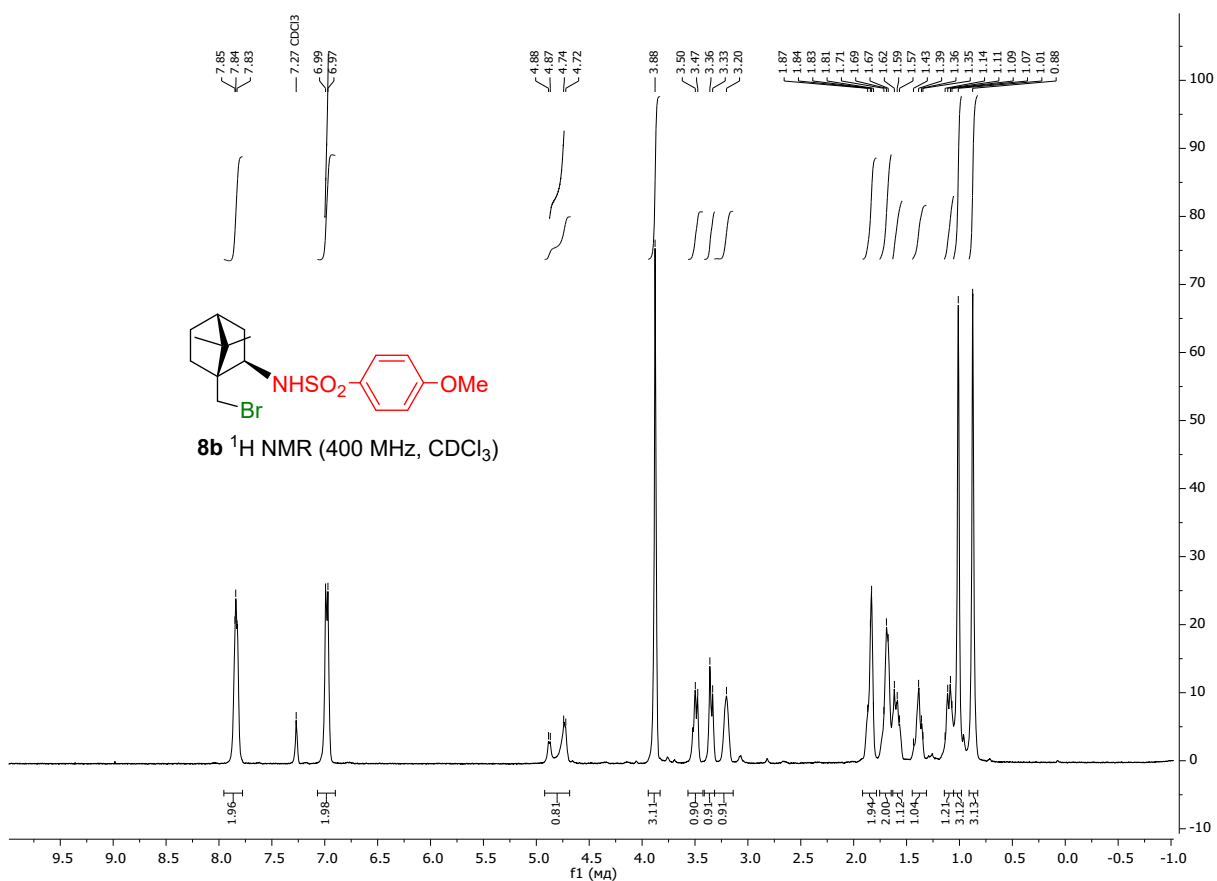

**Figure S82.**  $^{13}\text{C}$  NMR spectrum of compound **8b**

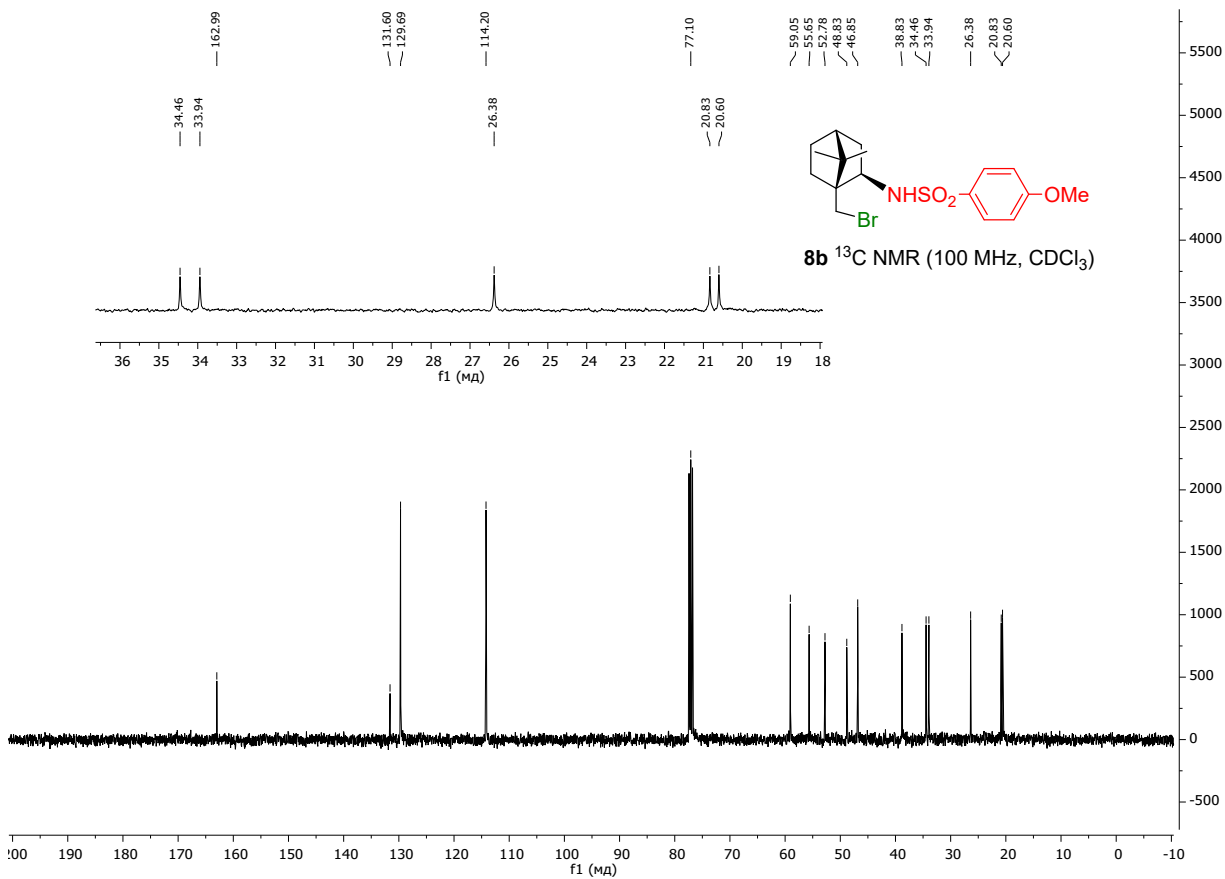



Figure S83. <sup>1</sup>H NMR spectrum of compound **8c**

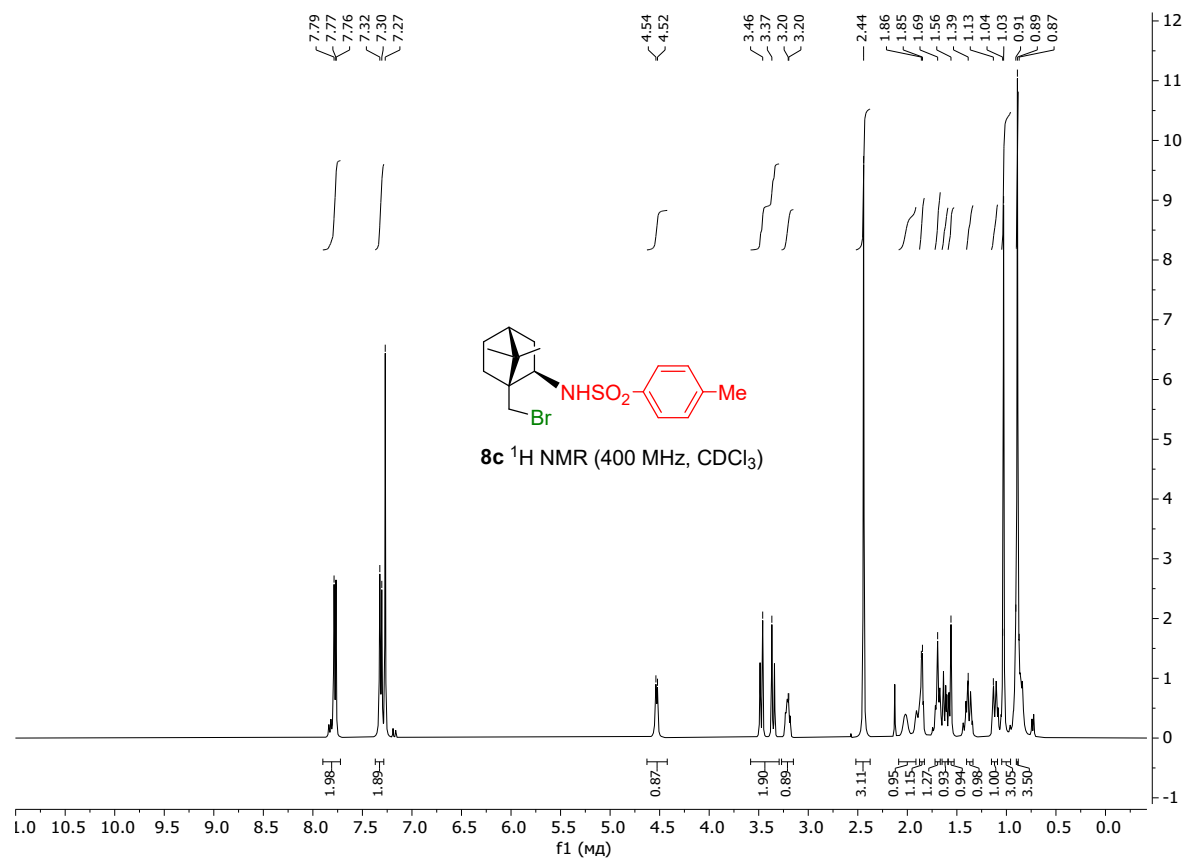

Figure S84. <sup>13</sup>C NMR spectrum of compound **8c**

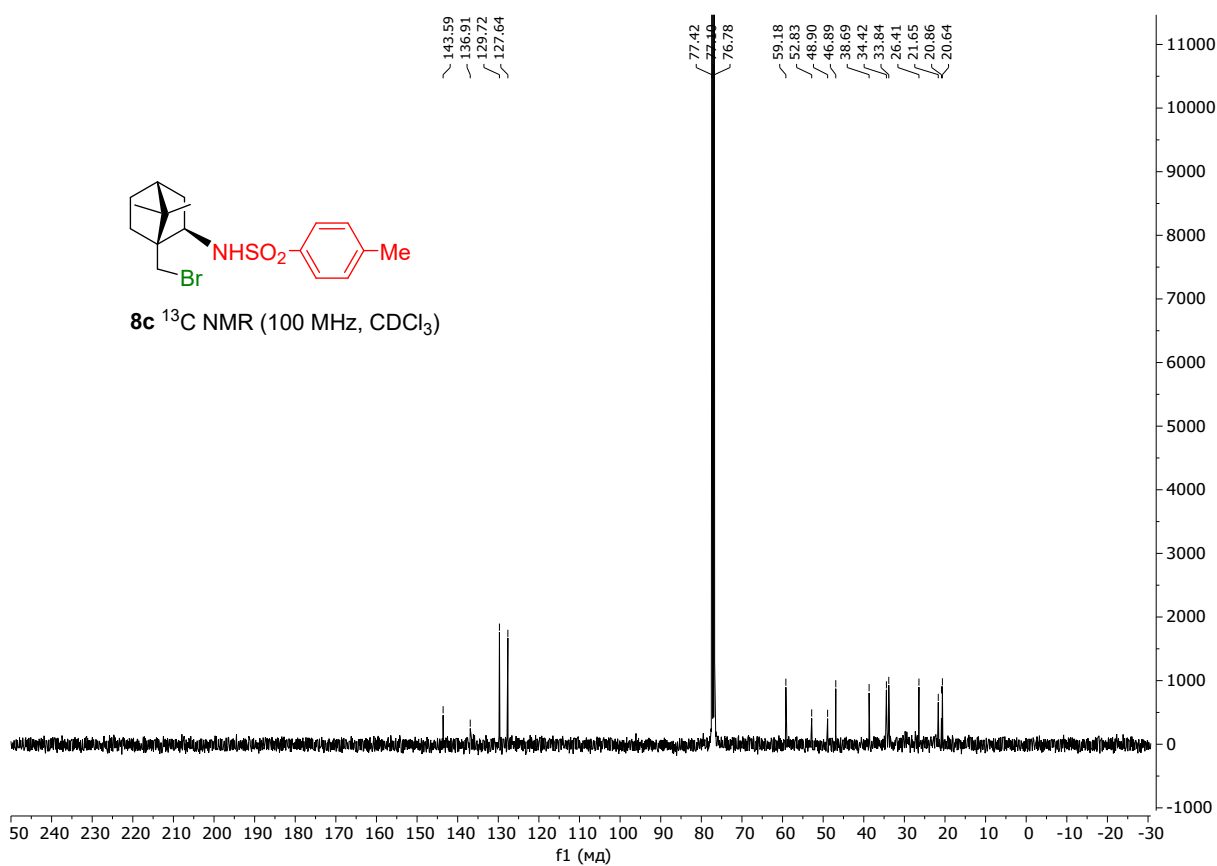

Figure S85. <sup>1</sup>H NMR spectrum of compound 8d

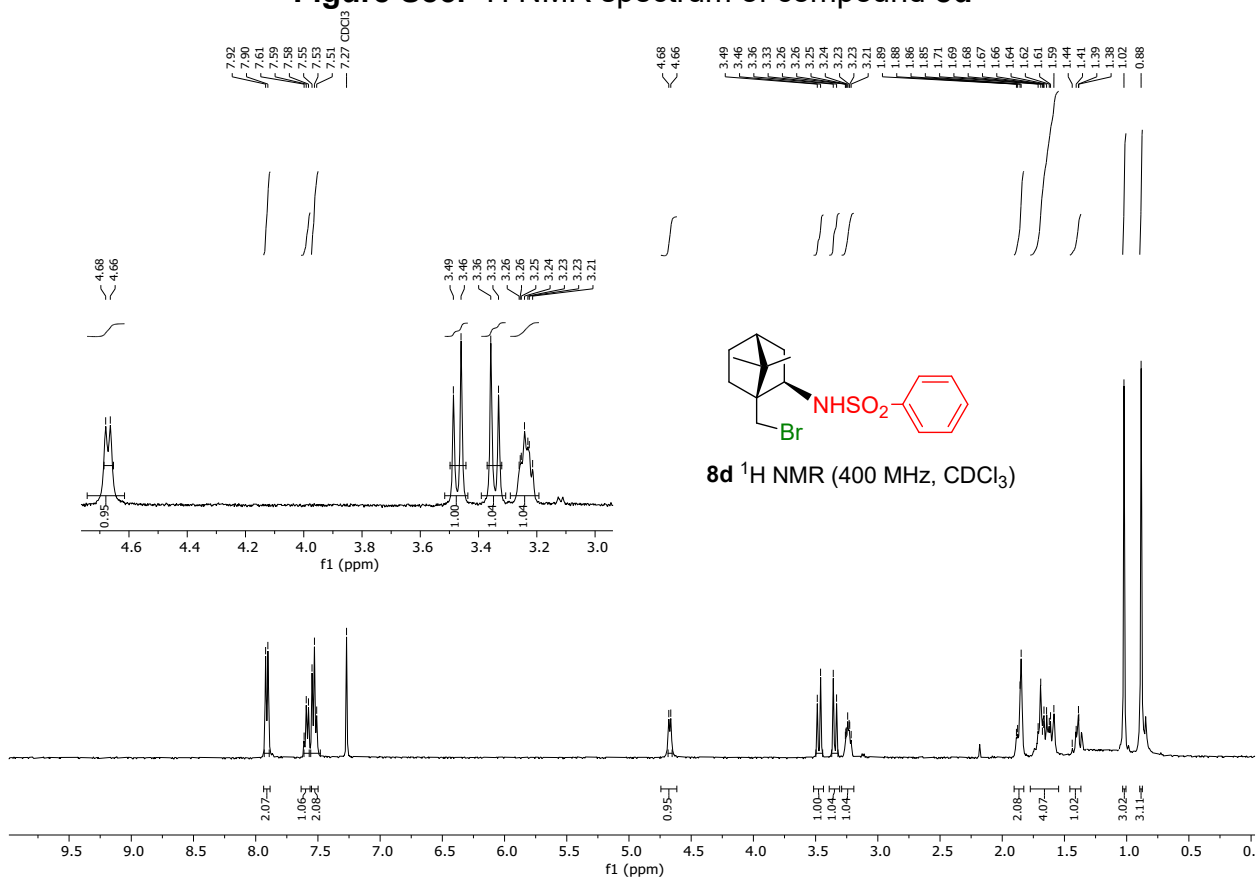

Figure S86. <sup>13</sup>C NMR spectrum of compound 8d

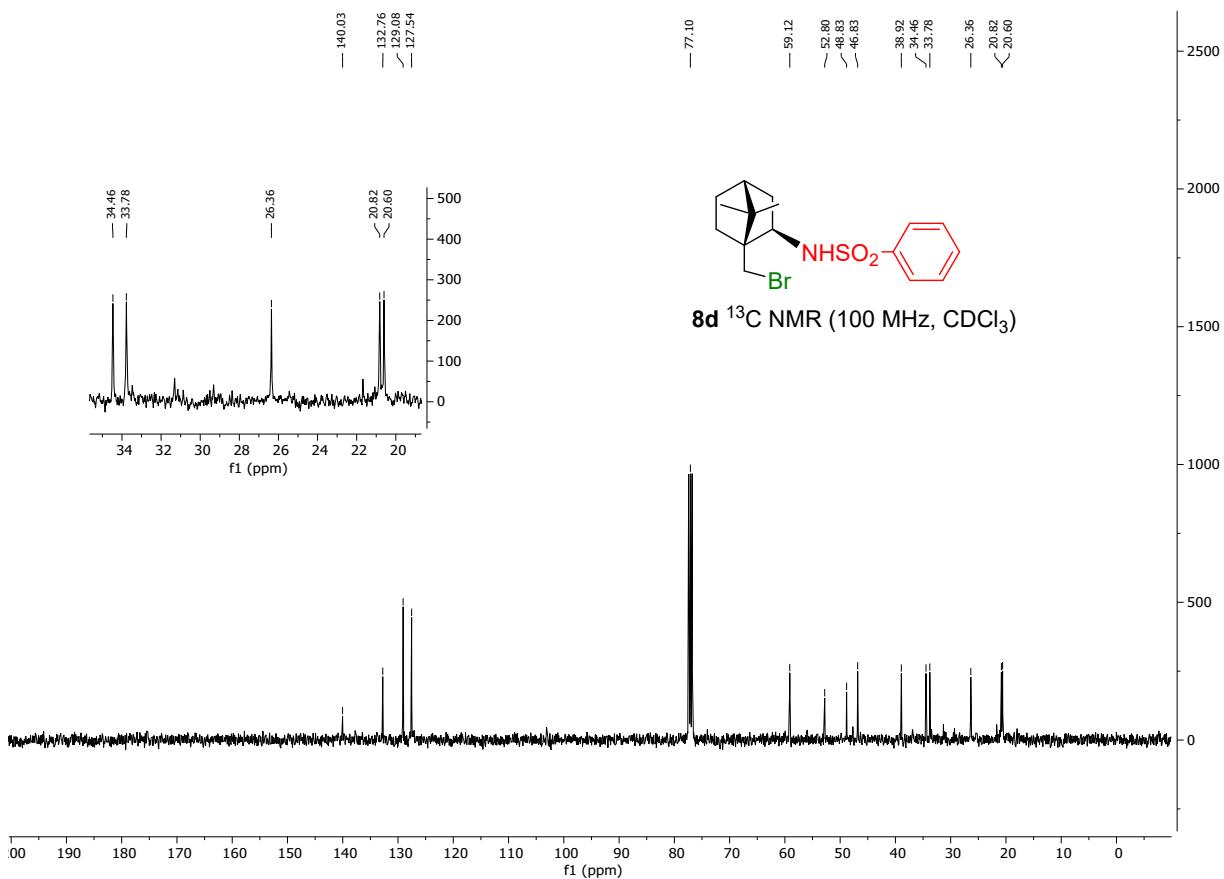

Figure S87. <sup>1</sup>H NMR spectrum of compound **8e**

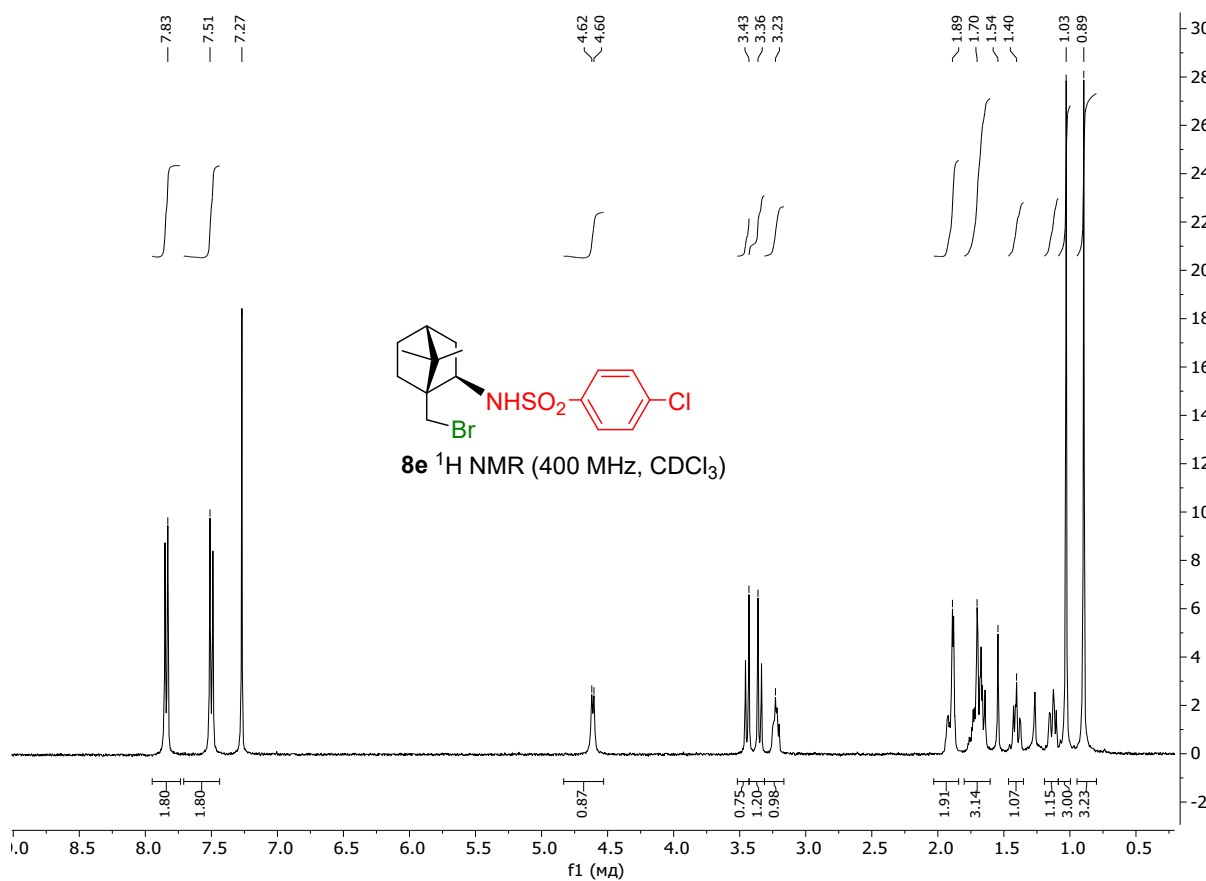

Figure S88. <sup>13</sup>C NMR spectrum of compound **8e**

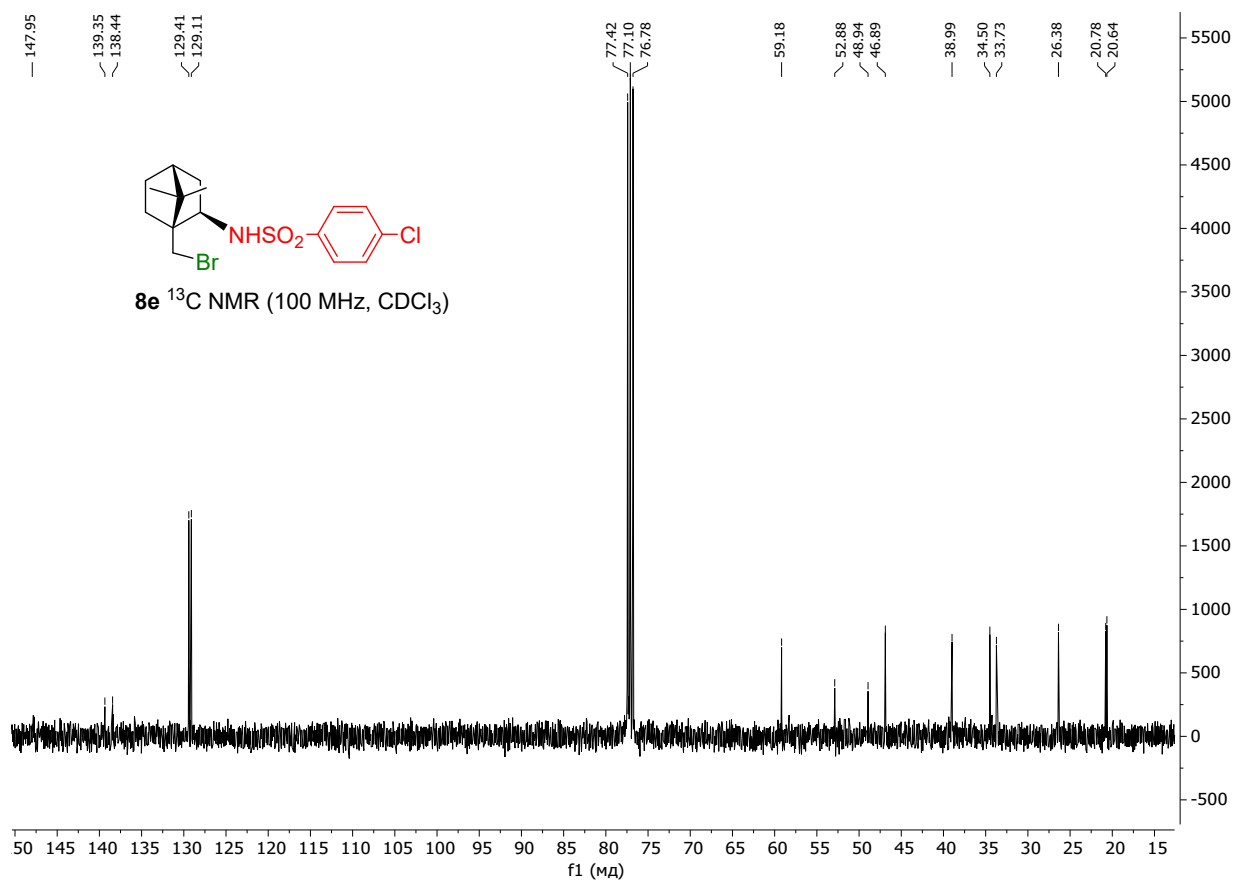

Figure S89. <sup>1</sup>H NMR spectrum of compound **8f**

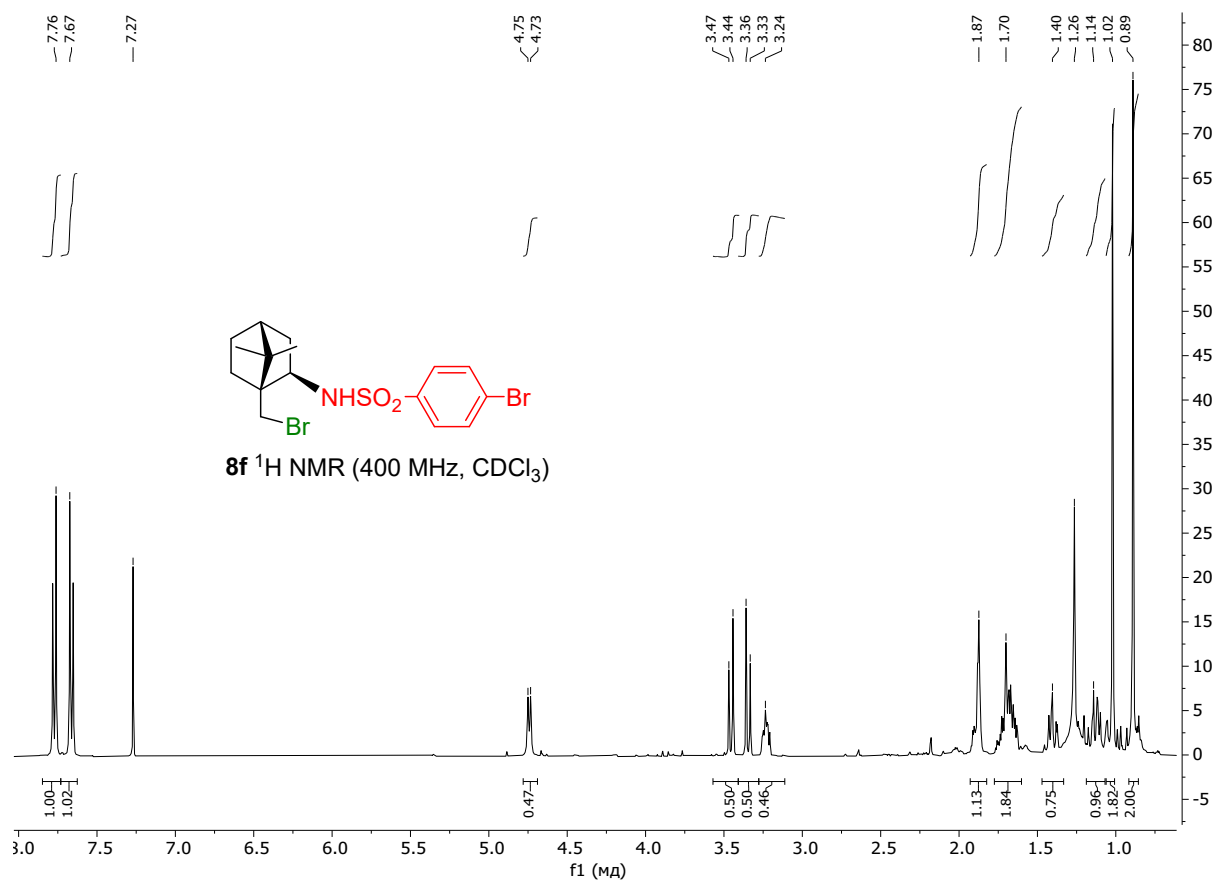

Figure S90. <sup>13</sup>C NMR spectrum of compound **8f**

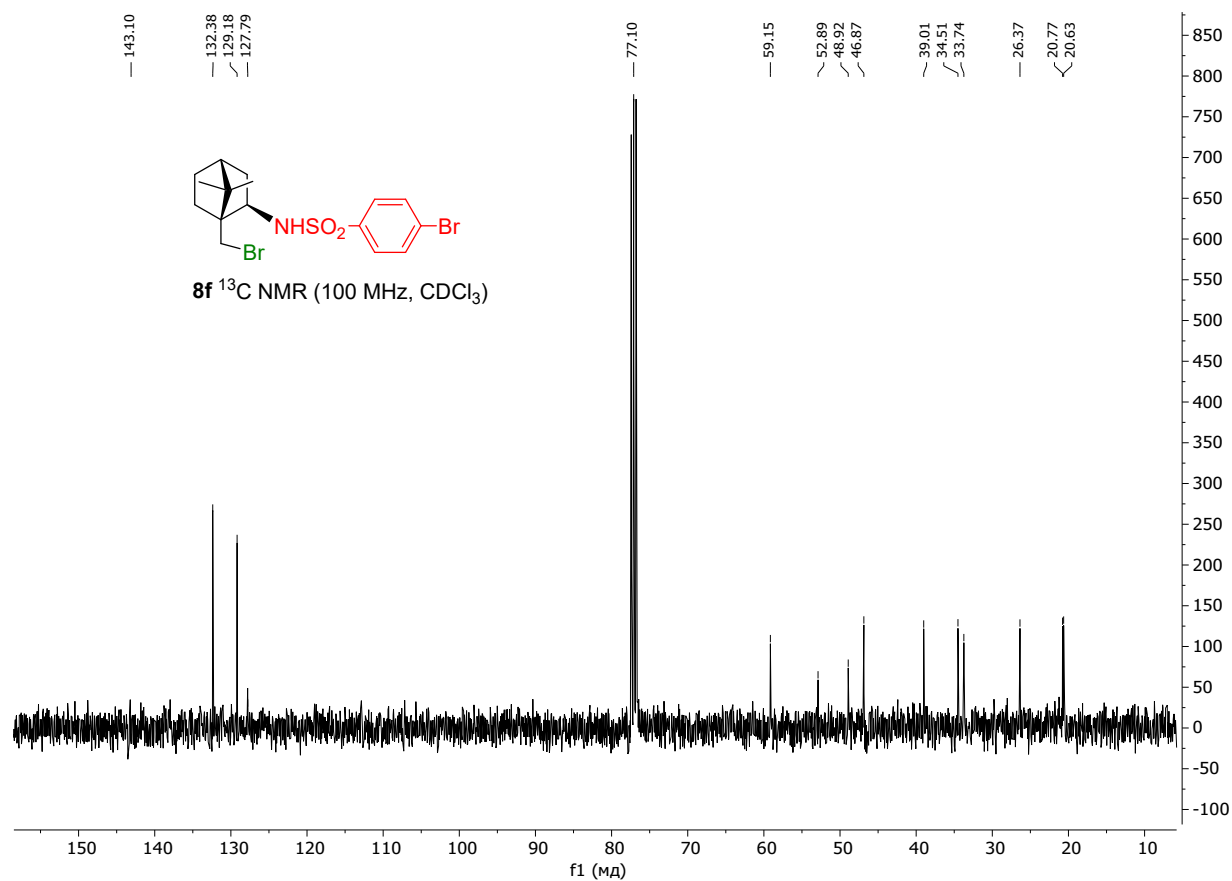







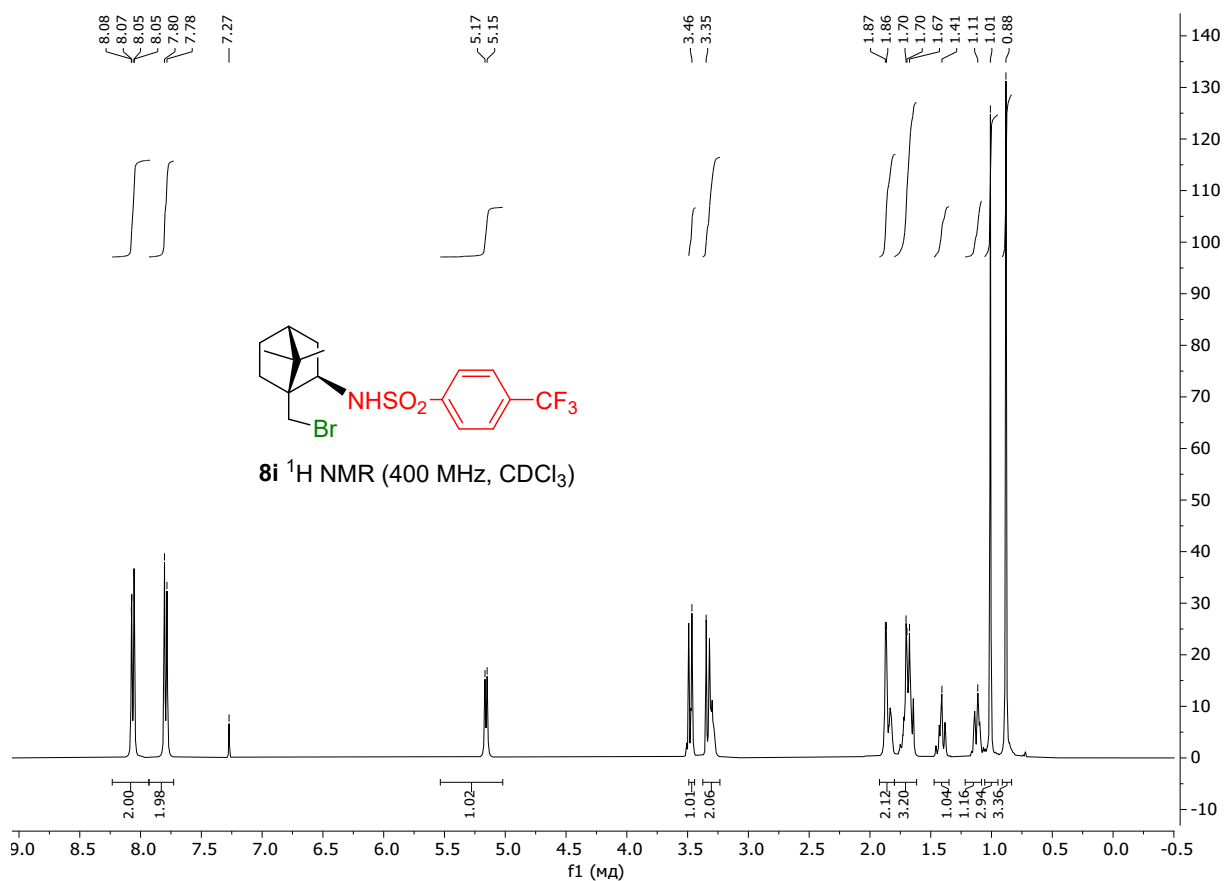

**Figure S97.** <sup>13</sup>C NMR spectrum of compound **8i**

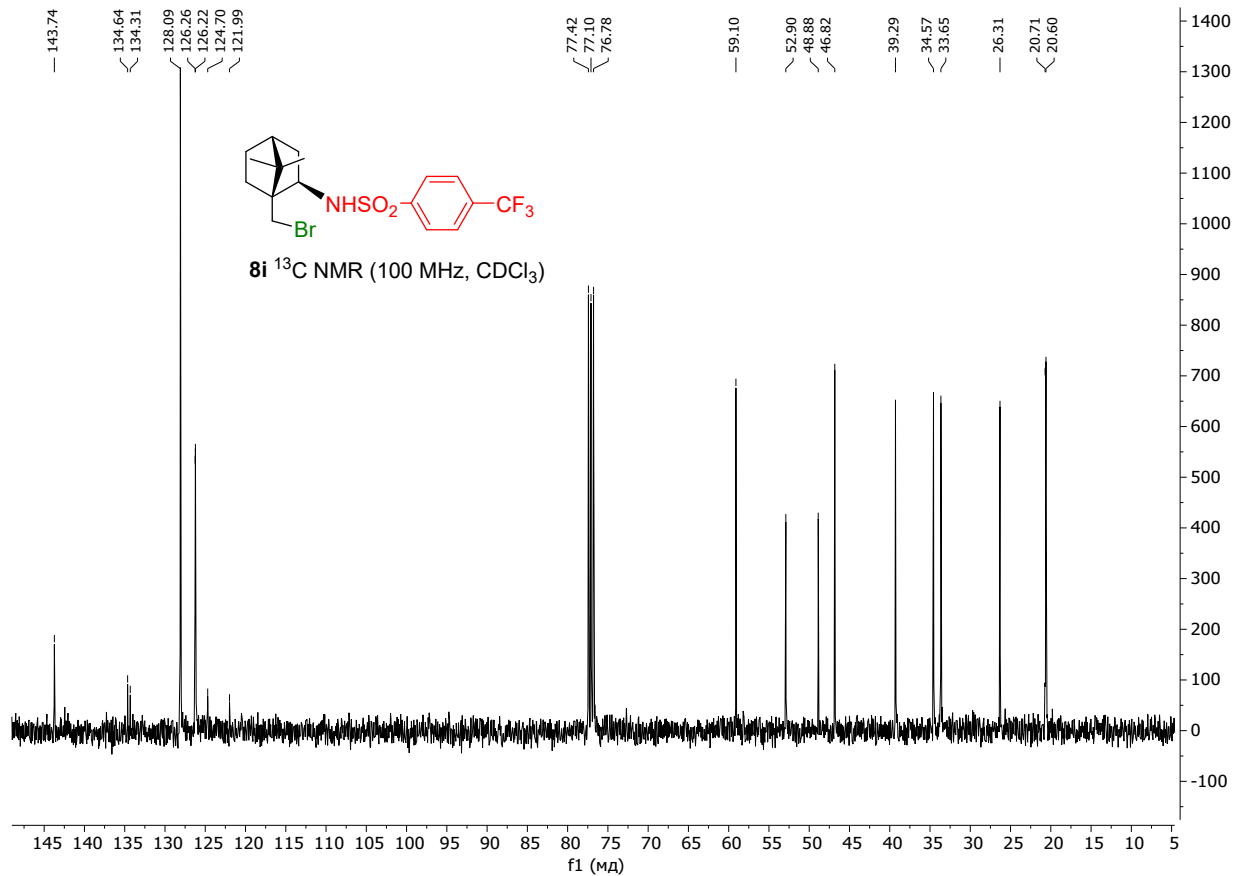



Figure S98.  $^{19}\text{F}$  NMR spectrum of compound **8i**

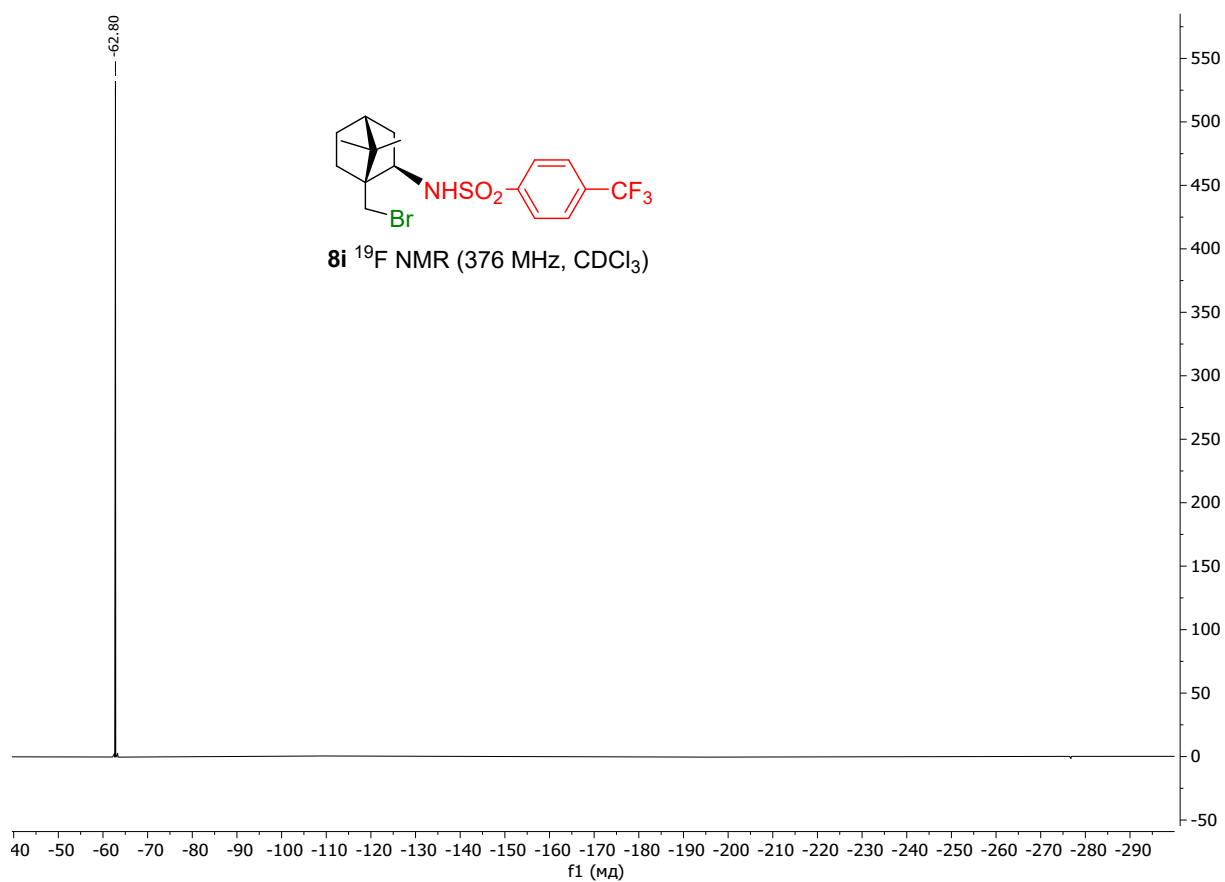

Figure S99.  $^1\text{H}$  NMR spectrum of compound **8j**

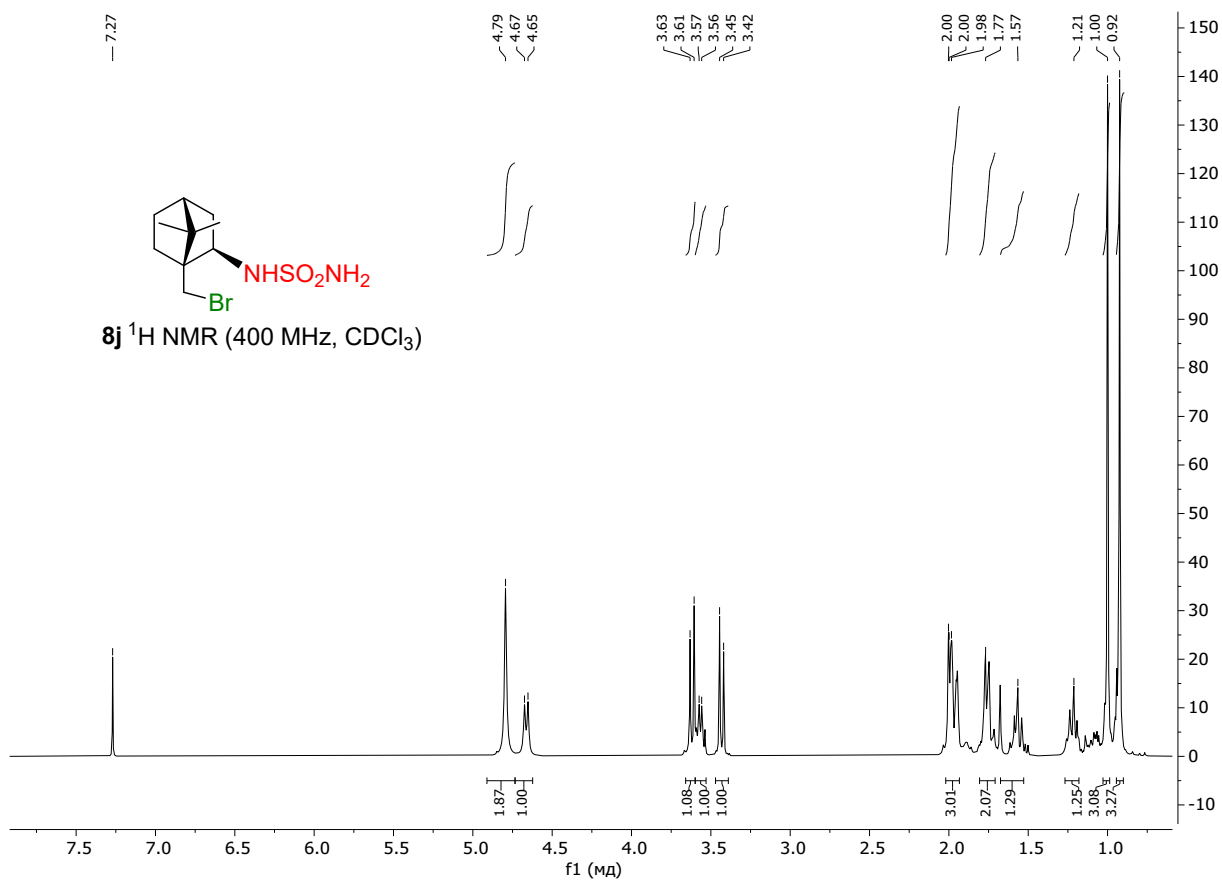

Figure S100.  $^{13}\text{C}$  NMR spectrum of compound **8j**

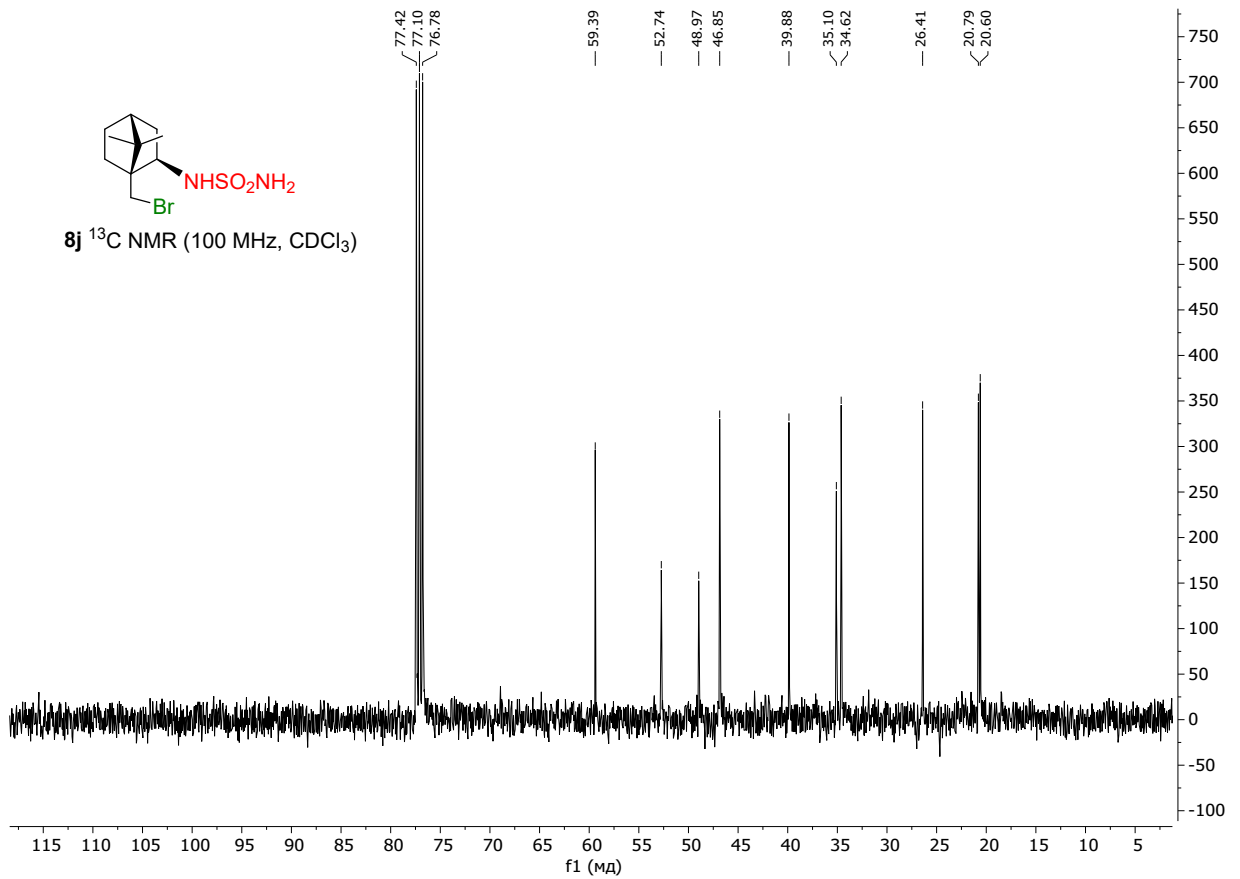

Figure S101.  $^1\text{H}$  NMR spectrum of compound **8k**

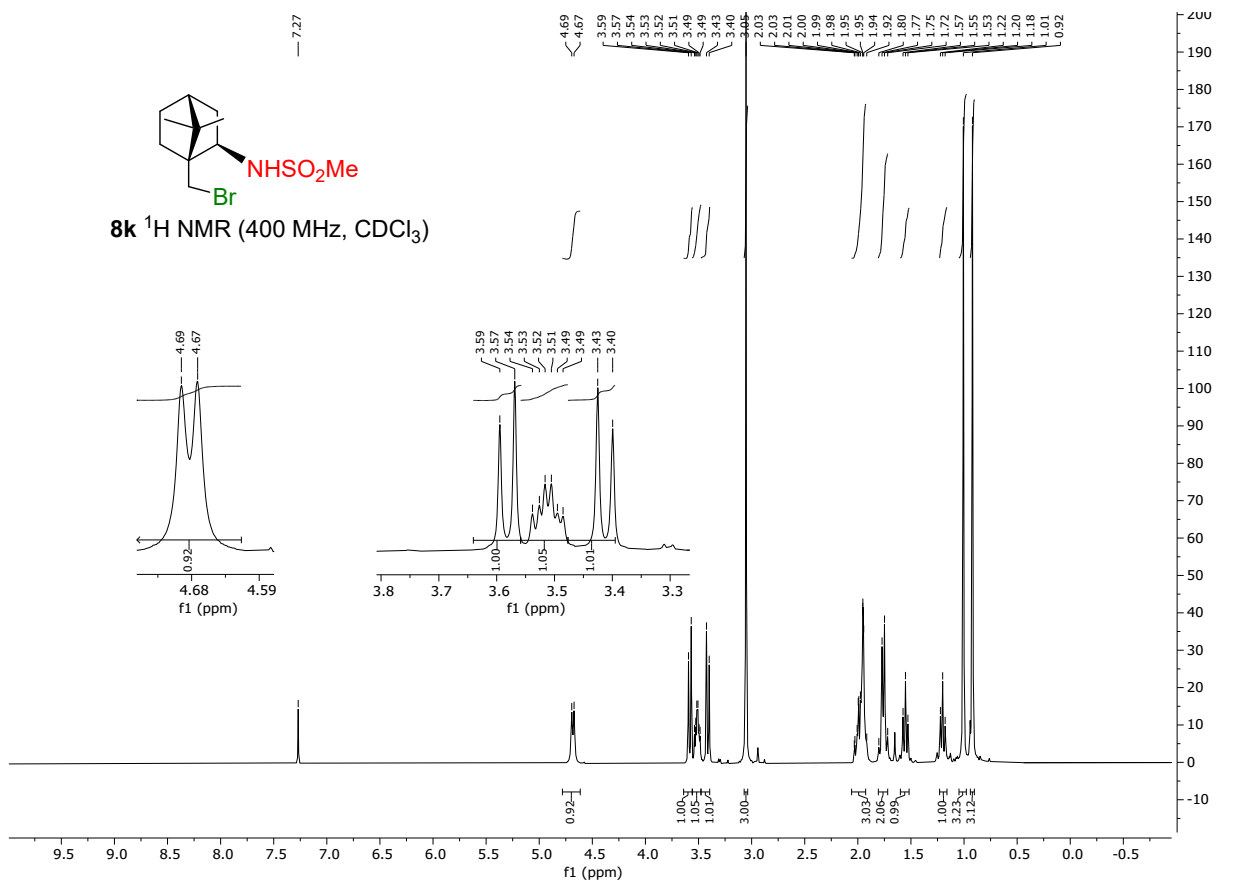

Figure S102.  $^{13}\text{C}$  NMR spectrum of compound **8k**

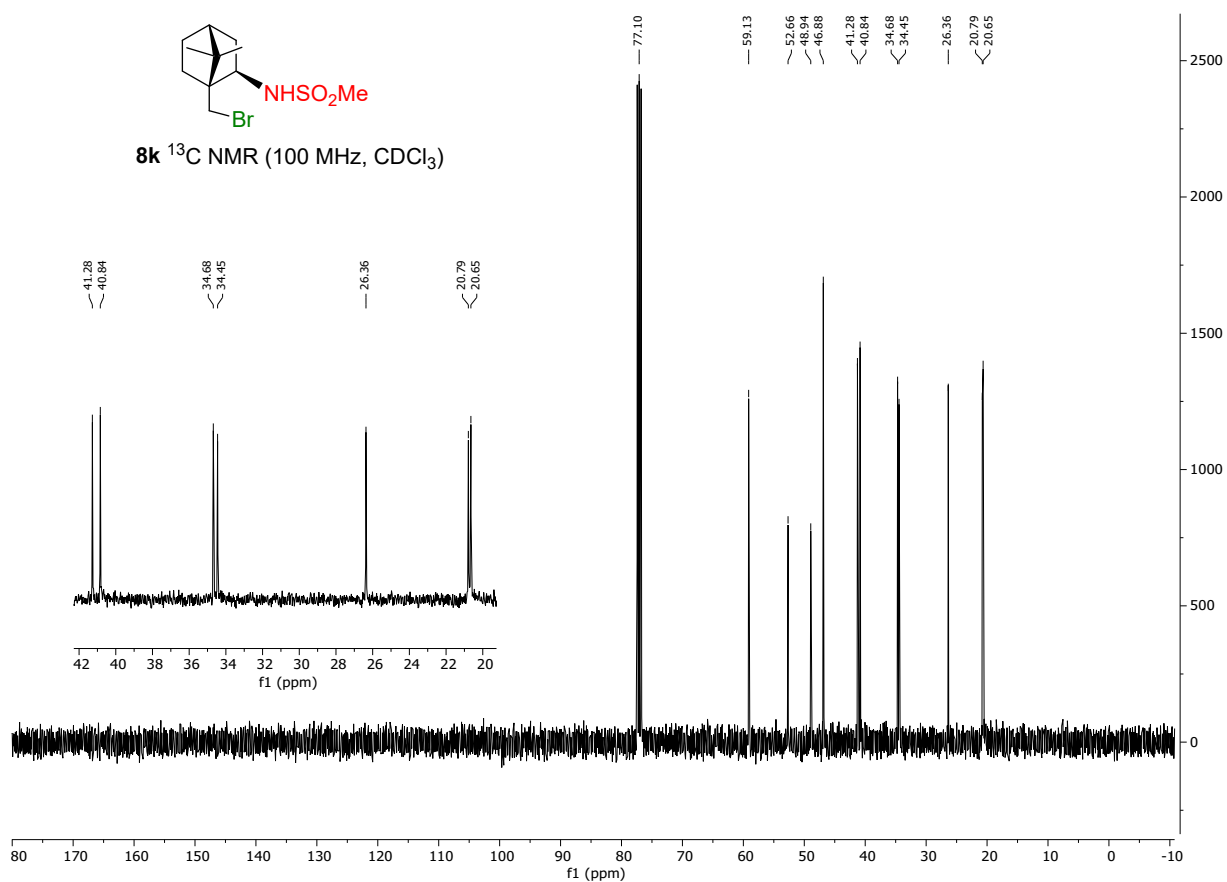

Figure S103.  $^1\text{H}$  NMR spectrum of compound **9**

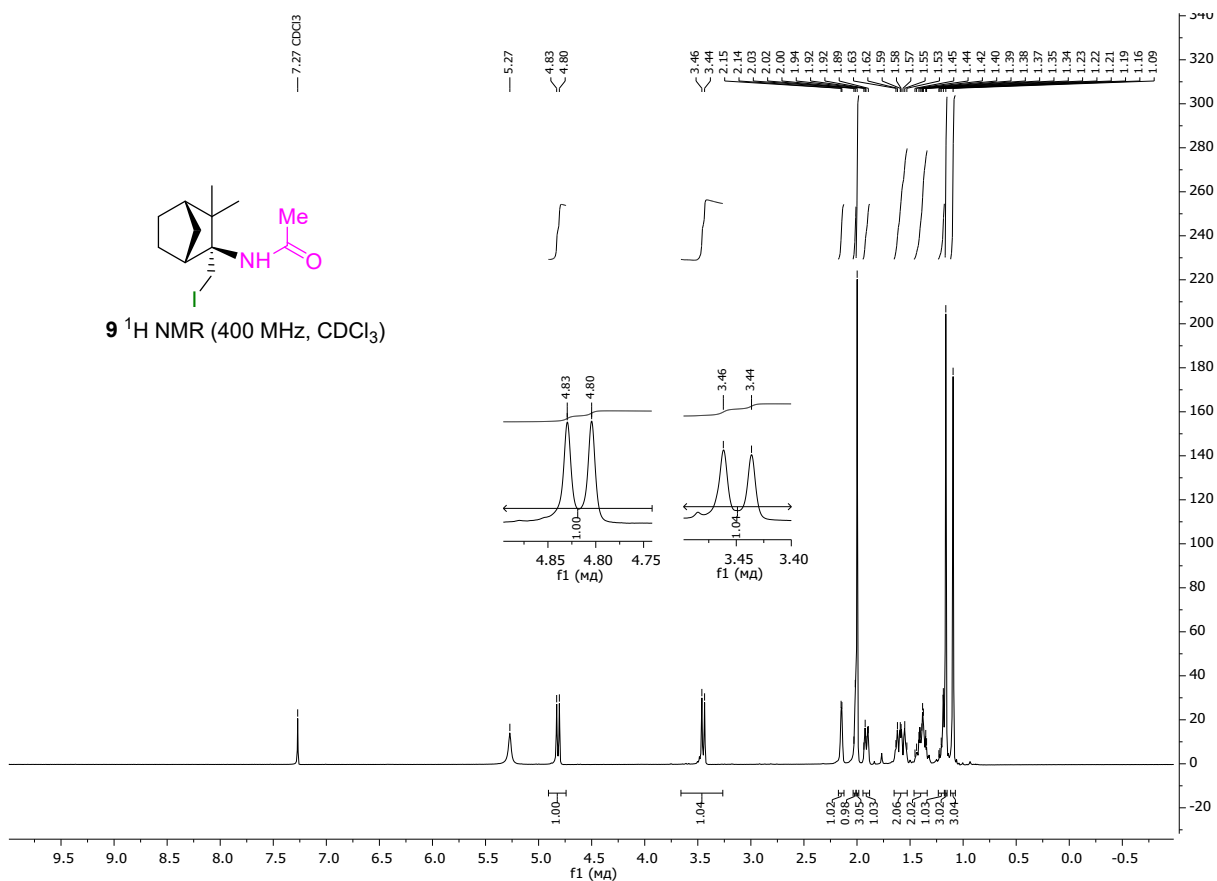

**Figure S104.**  $^{13}\text{C}$  NMR spectrum of compound **9**

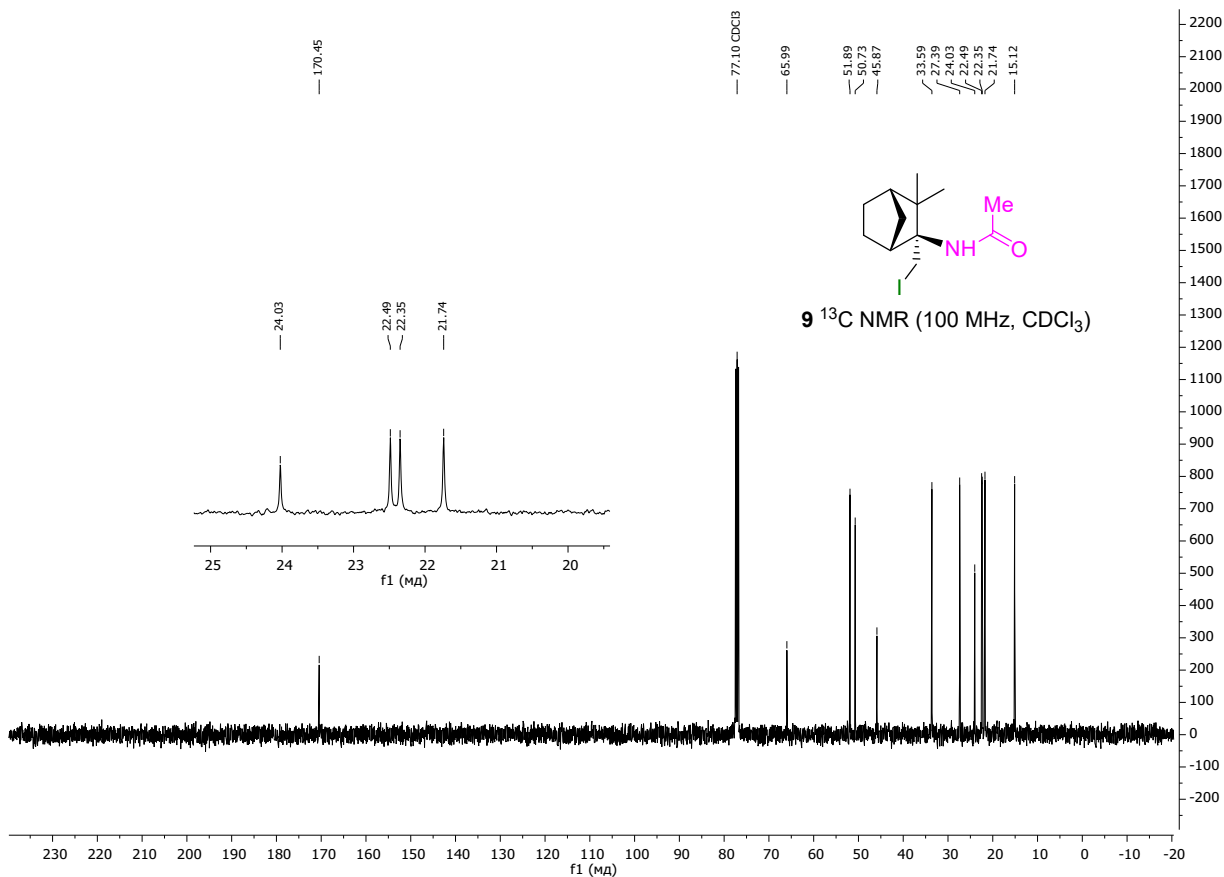

Figure S105. <sup>1</sup>H NMR spectrum of compound 10

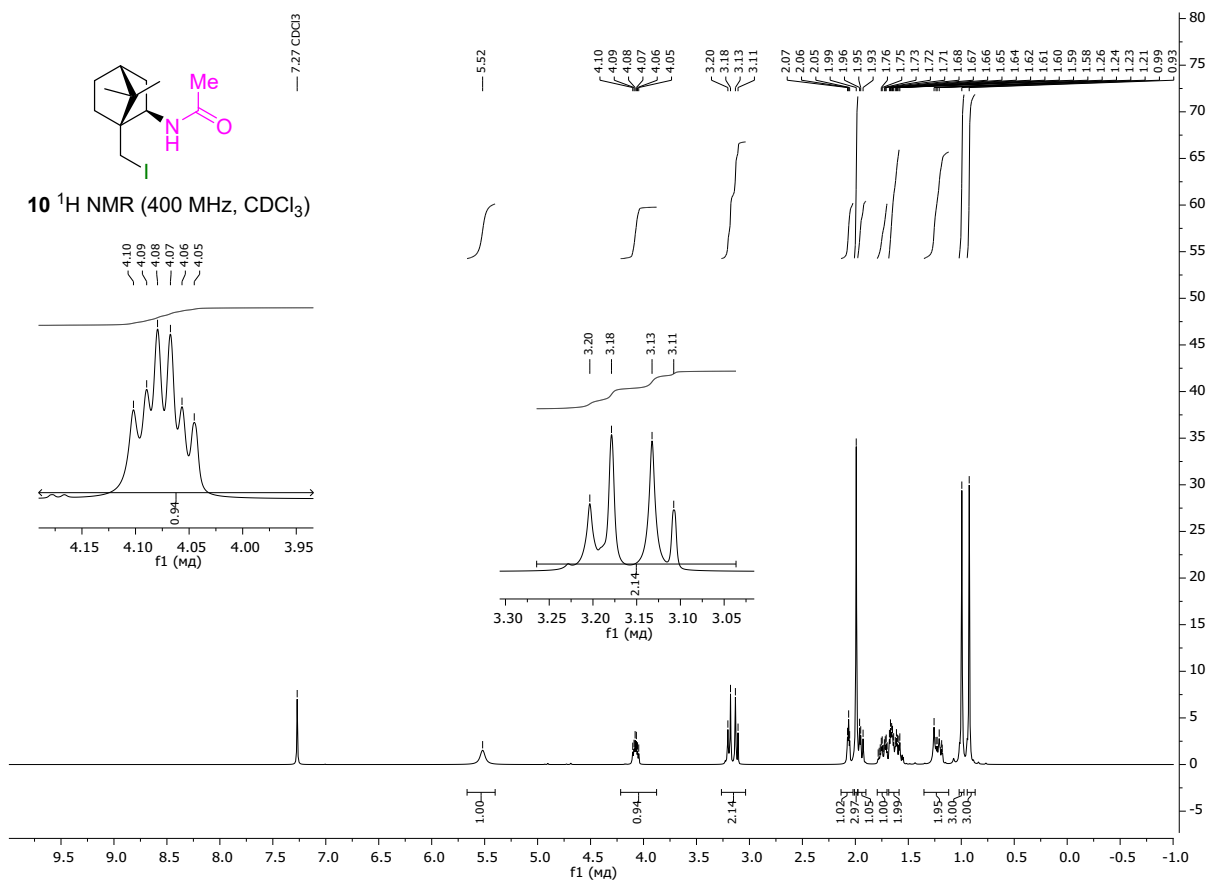

Figure S106. <sup>13</sup>C NMR spectrum of compound 10

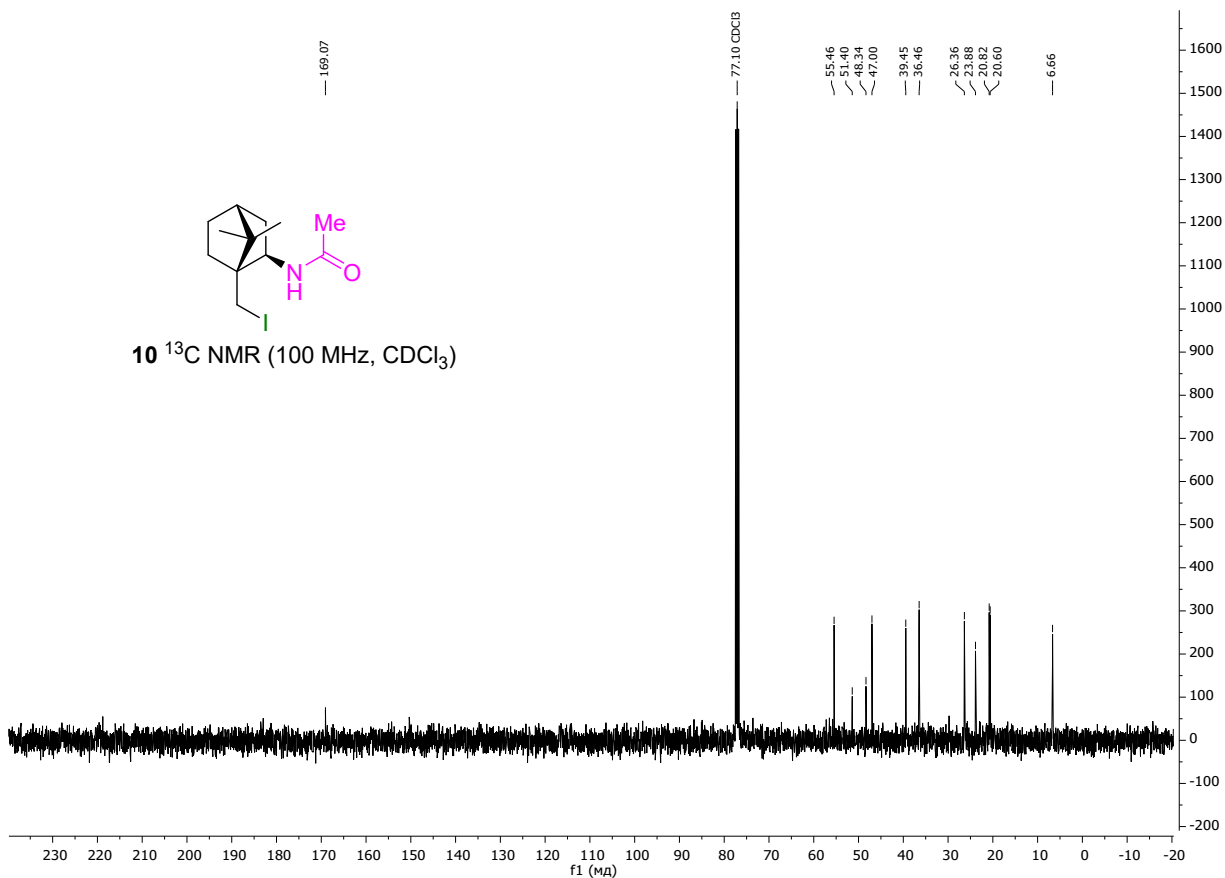

**Figure S107.**  $^1\text{H}$  NMR spectrum of compound 11

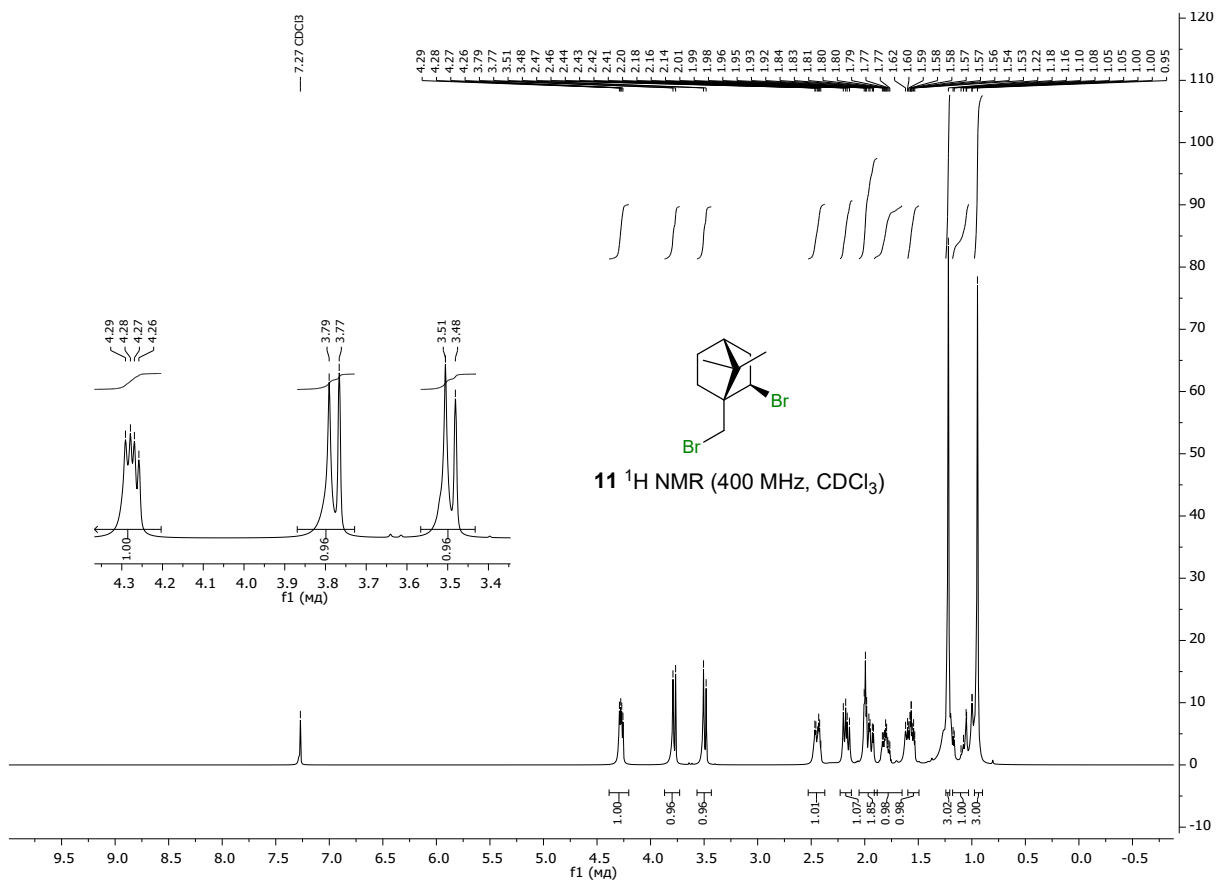

**Figure S108.**  $^{13}\text{C}$  NMR spectrum of compound **11**

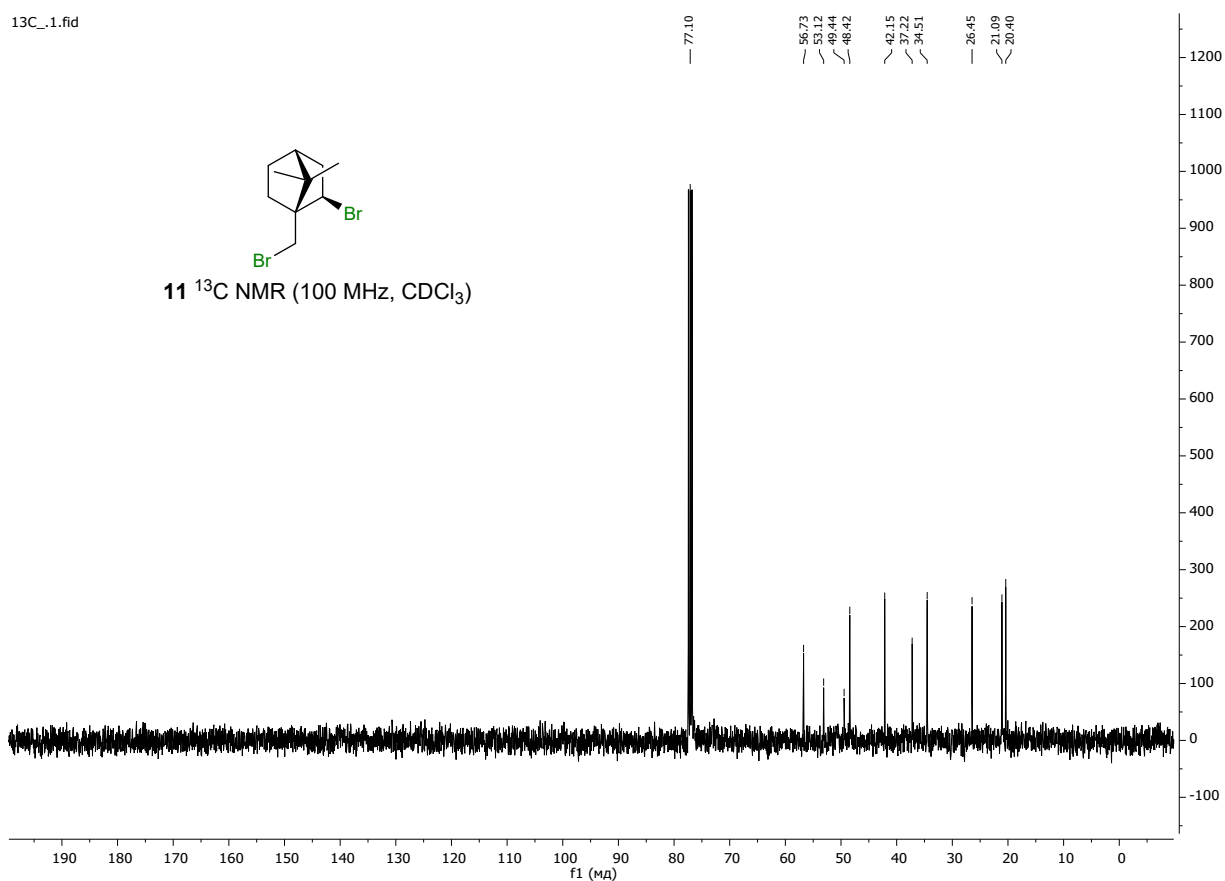

**Figure S109.**  $^1\text{H}$  NMR spectrum of compound **12**





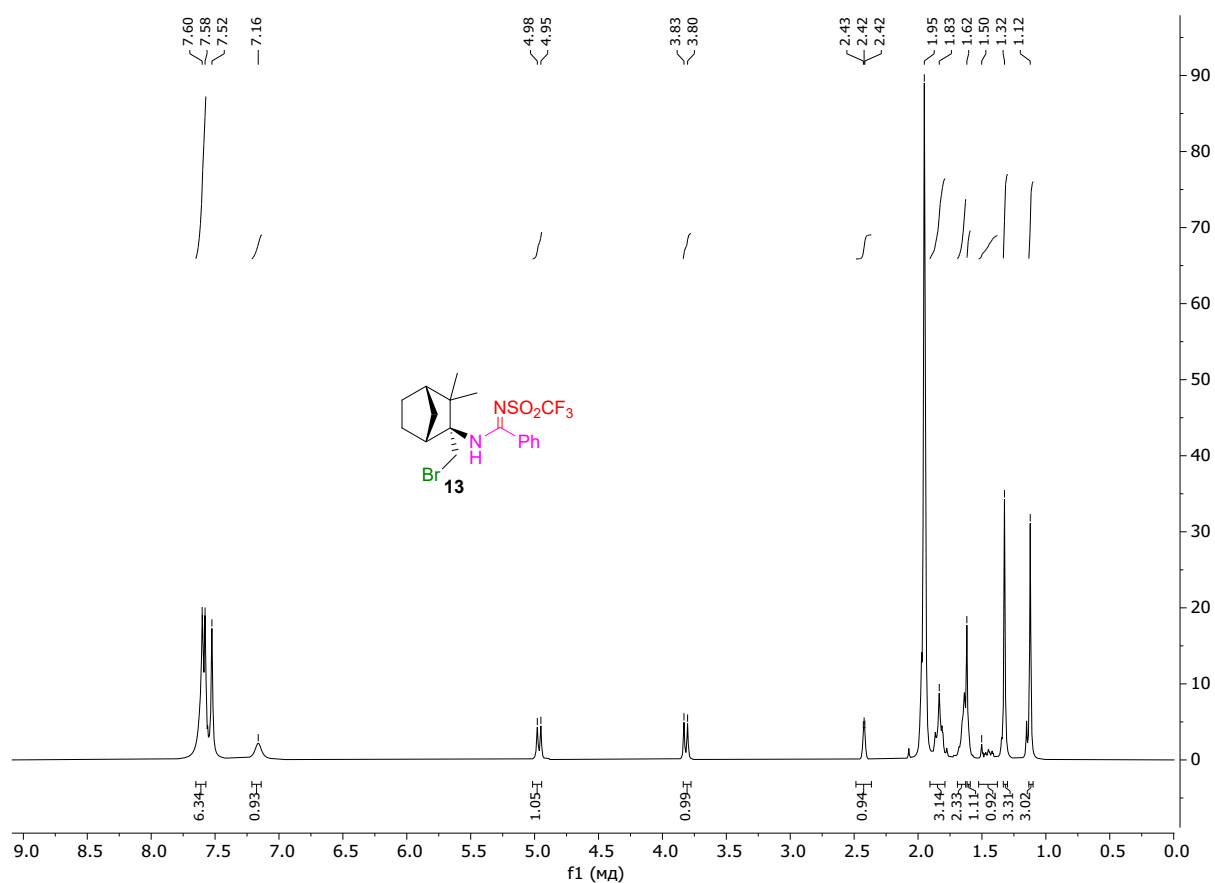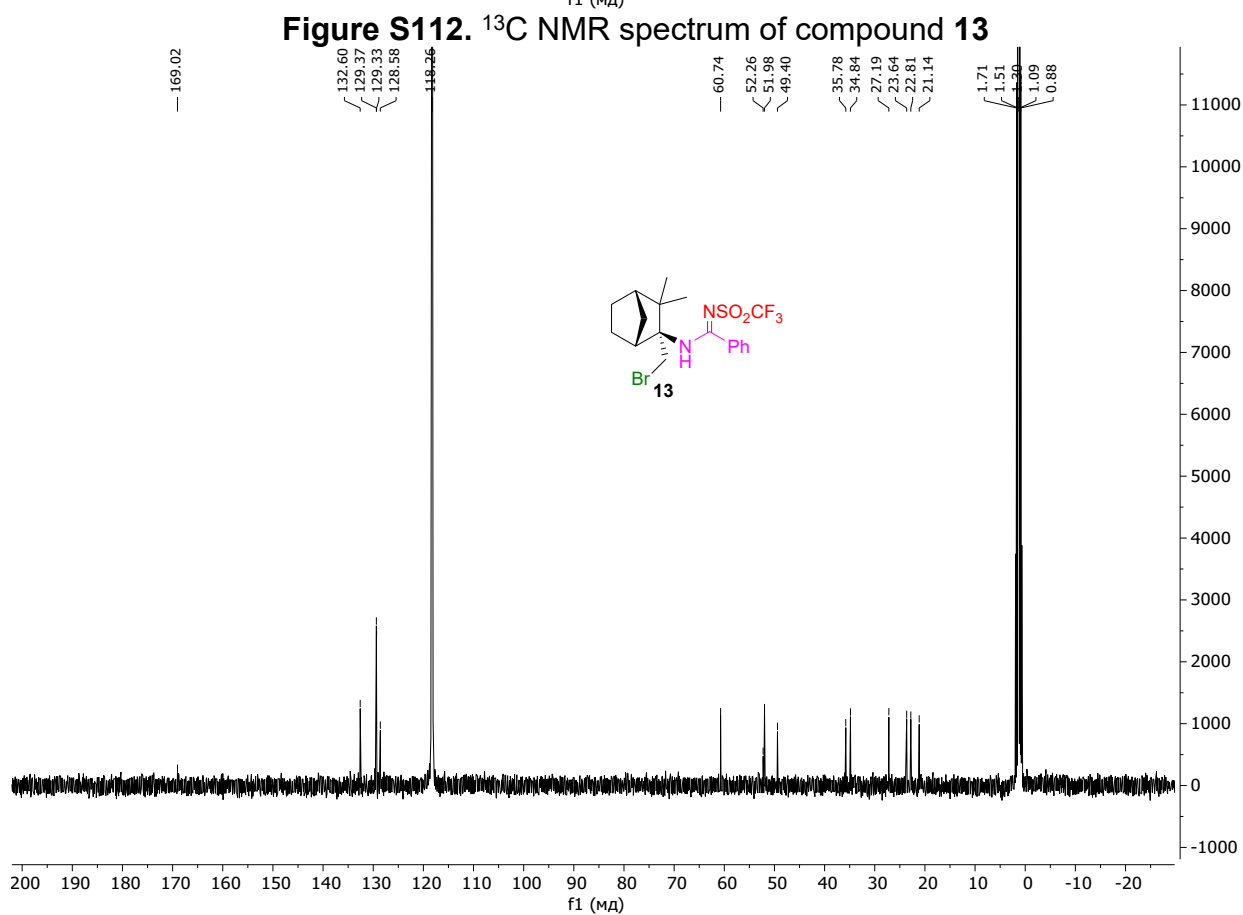

**Figure S113.  $^{19}\text{F}$  NMR spectrum of compound 13**

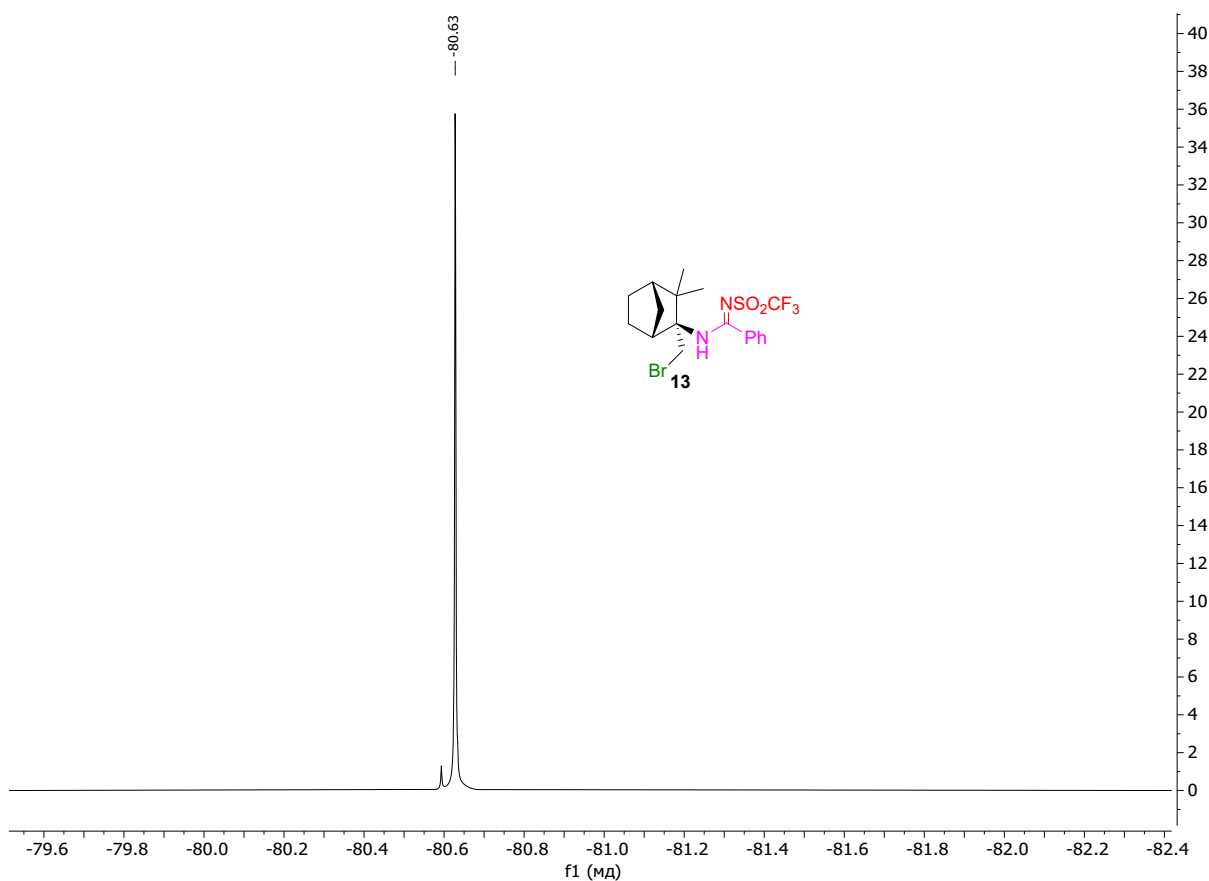

**Figure S114.** <sup>1</sup>H NMR spectrum of compound **14**

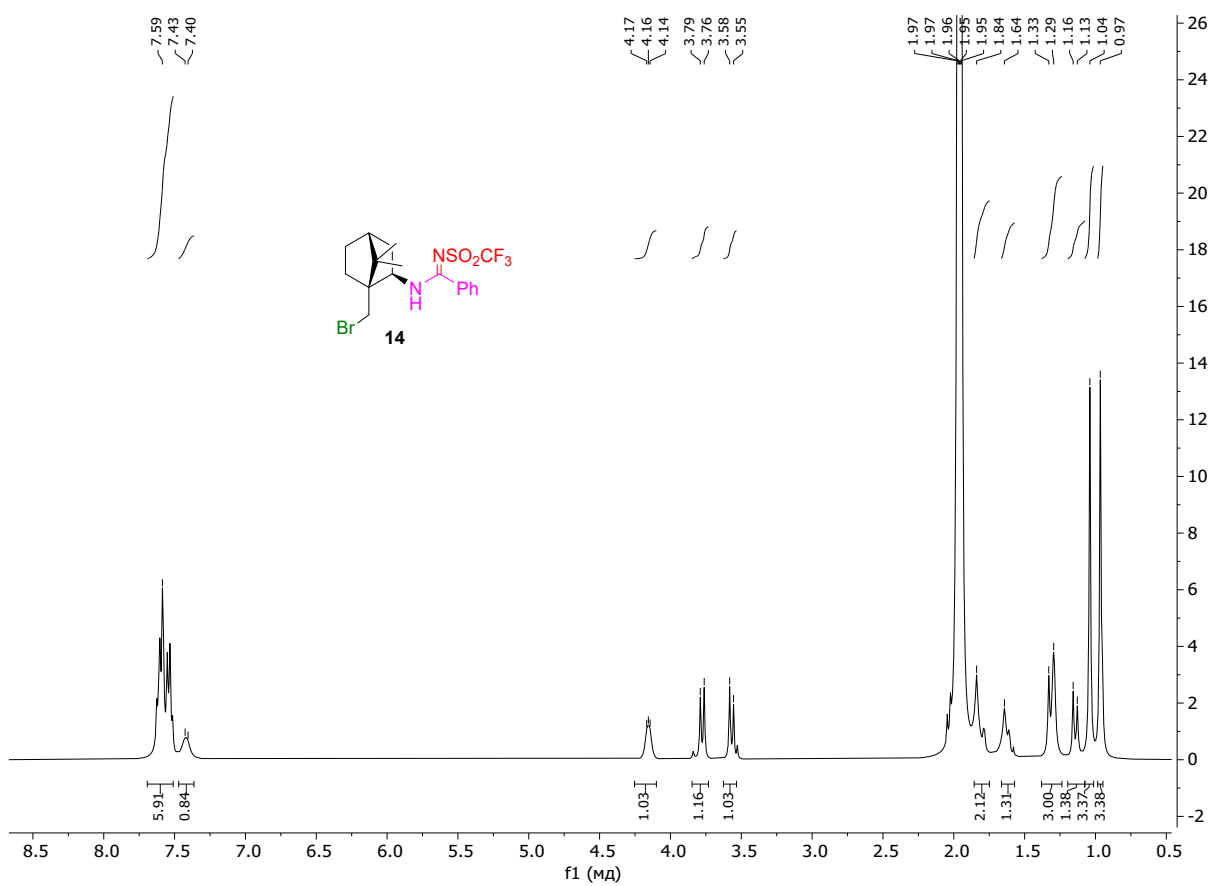

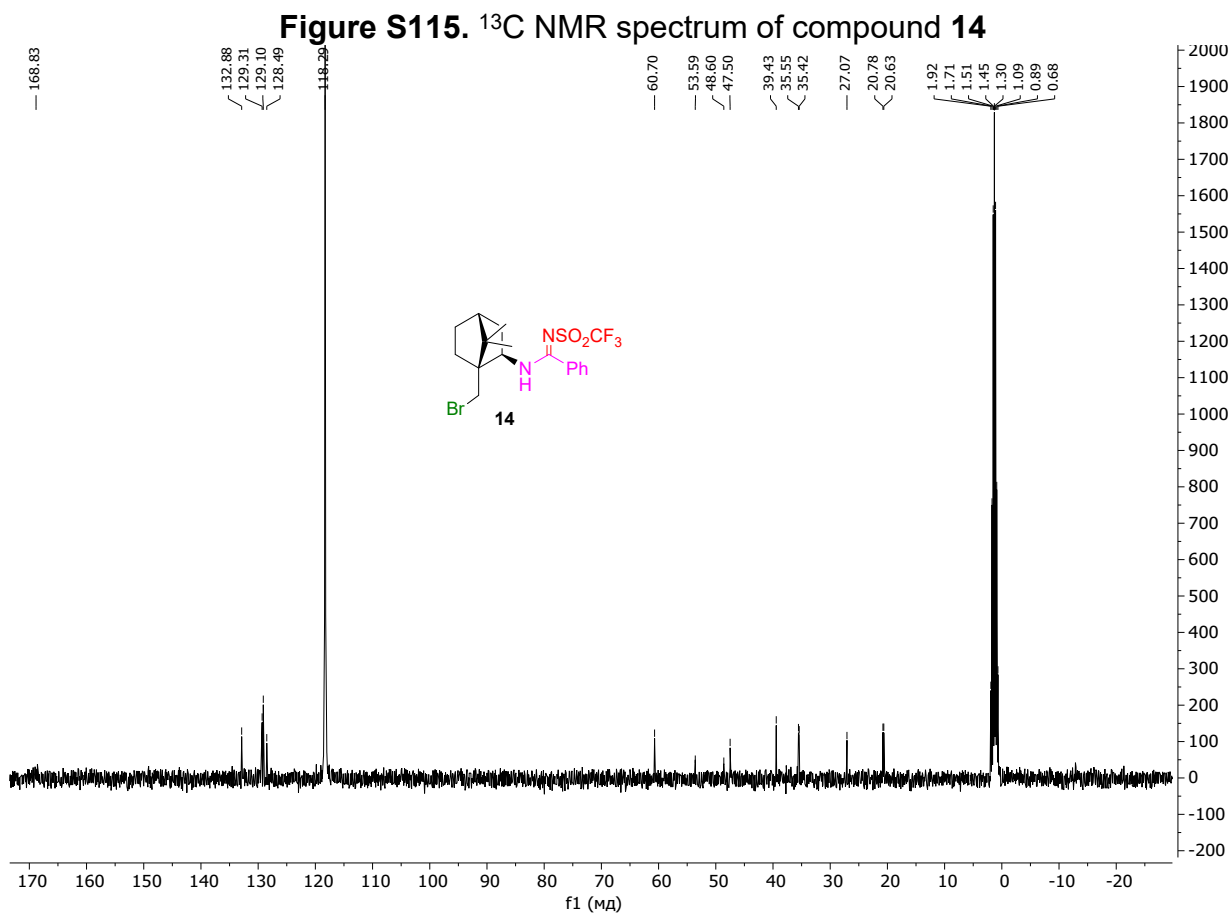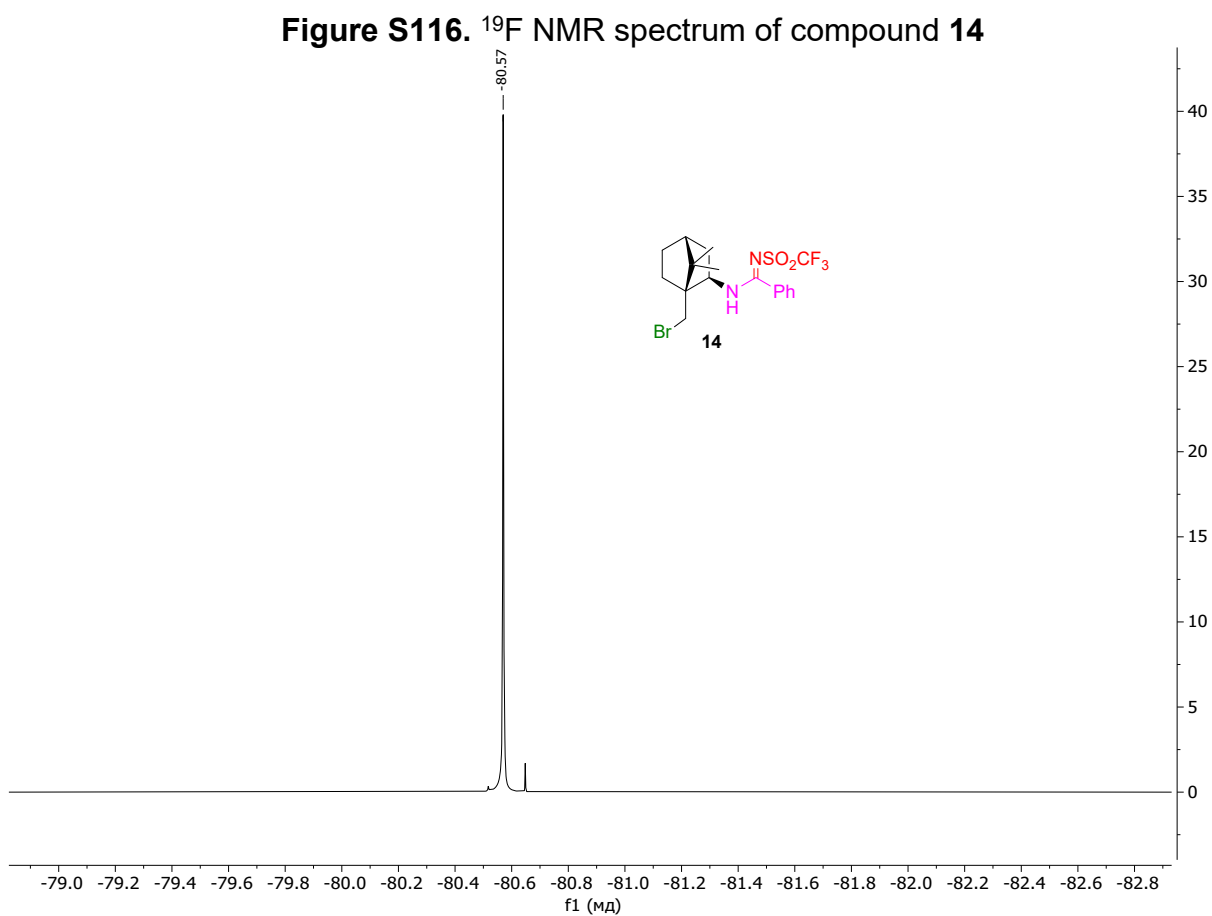

Figure S117. <sup>1</sup>H NMR spectrum of compound **15**

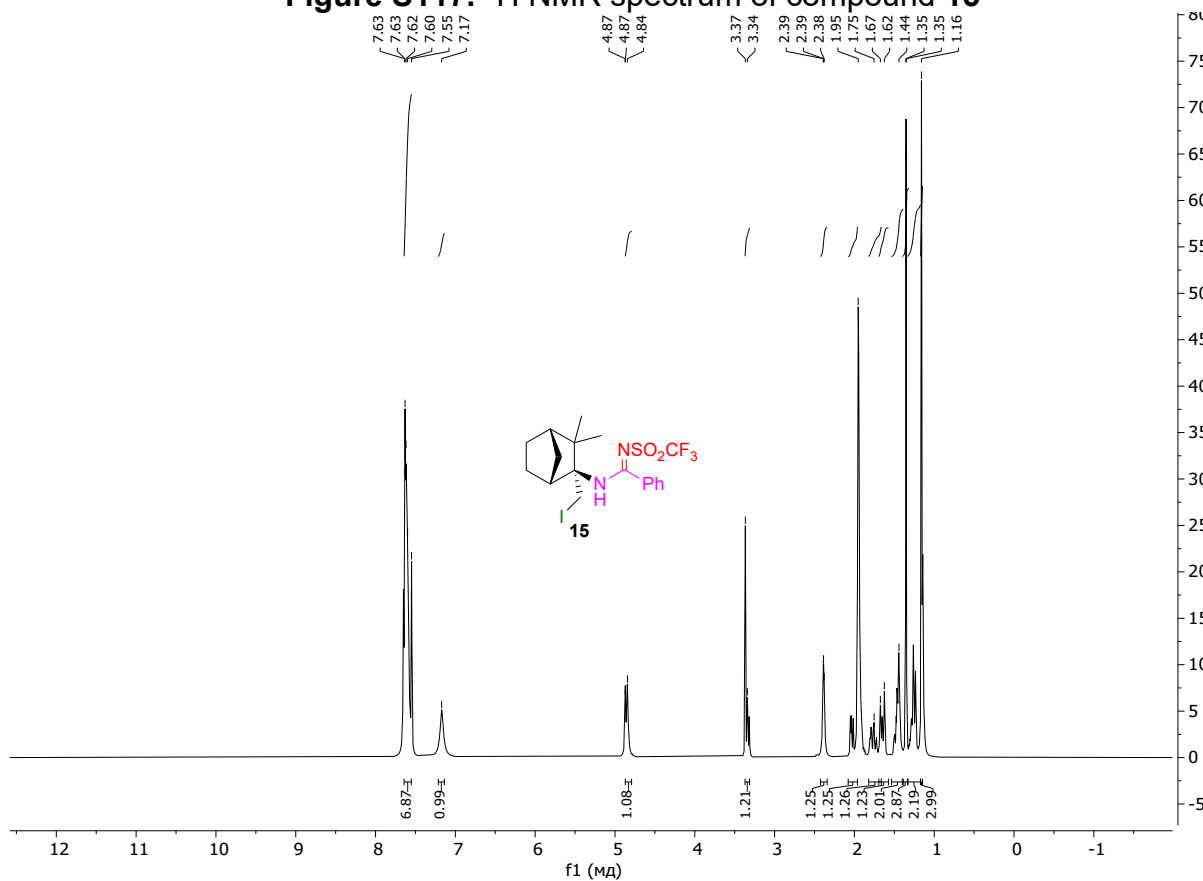

Figure S118. <sup>13</sup>C NMR spectrum of compound **15**

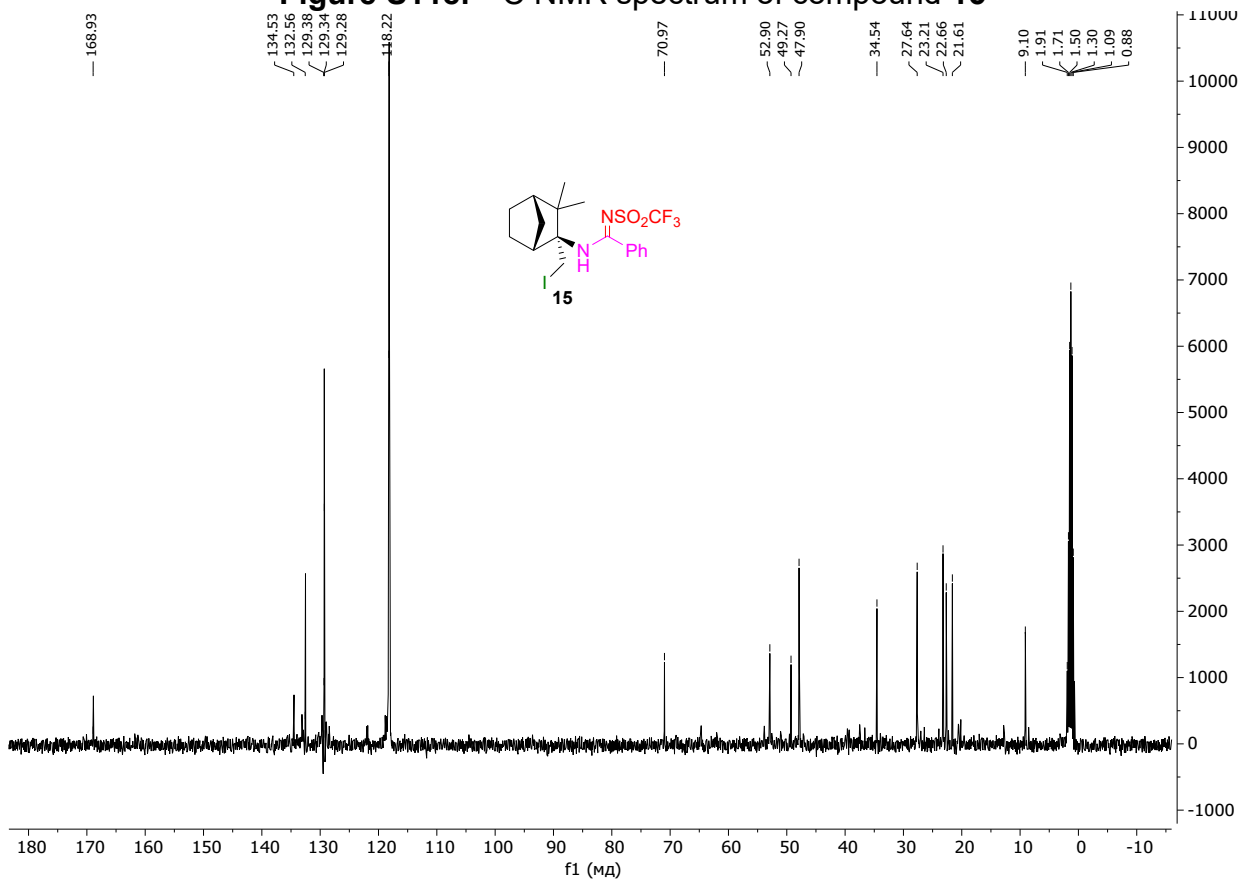

Figure S119.  $^{19}\text{F}$  NMR spectrum of compound **15**

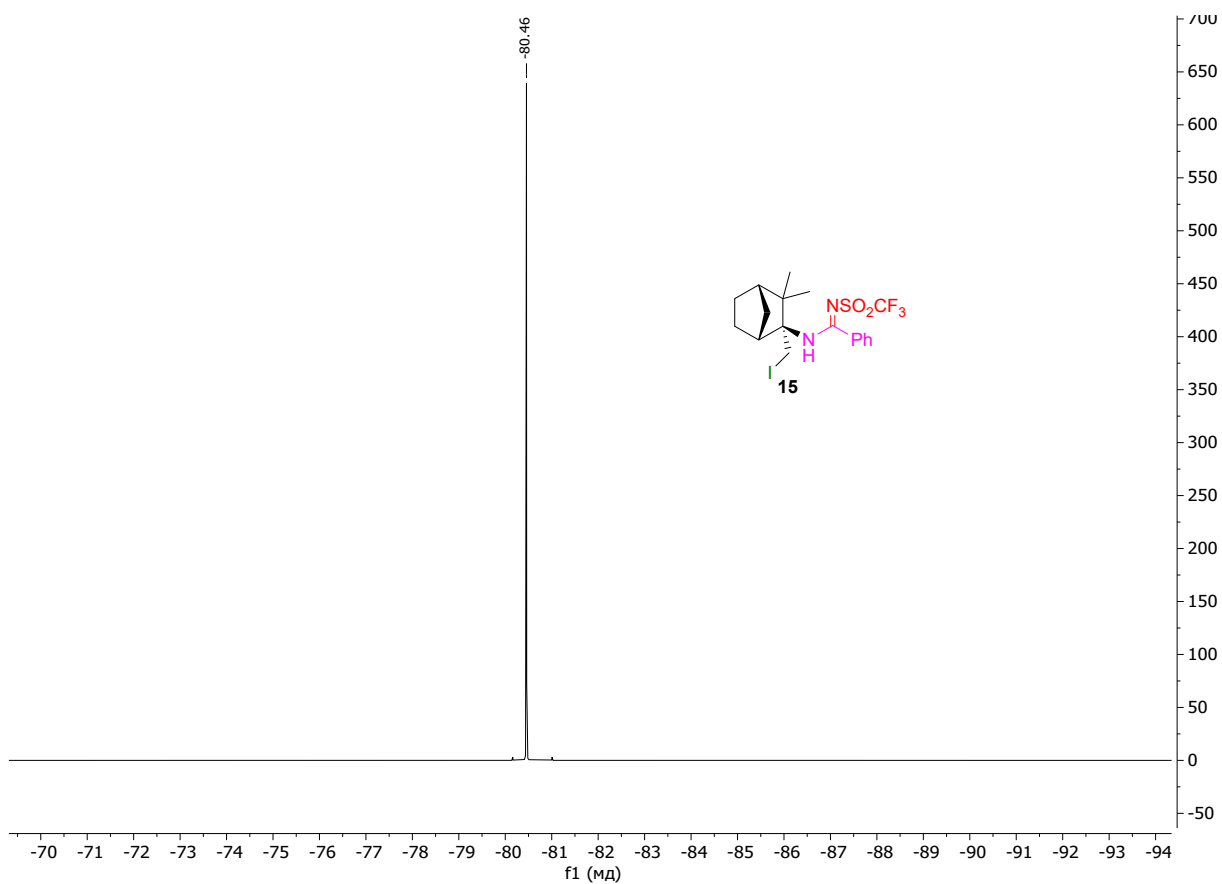

Figure S120.  $^1\text{H}$  NMR spectrum of compound **16**

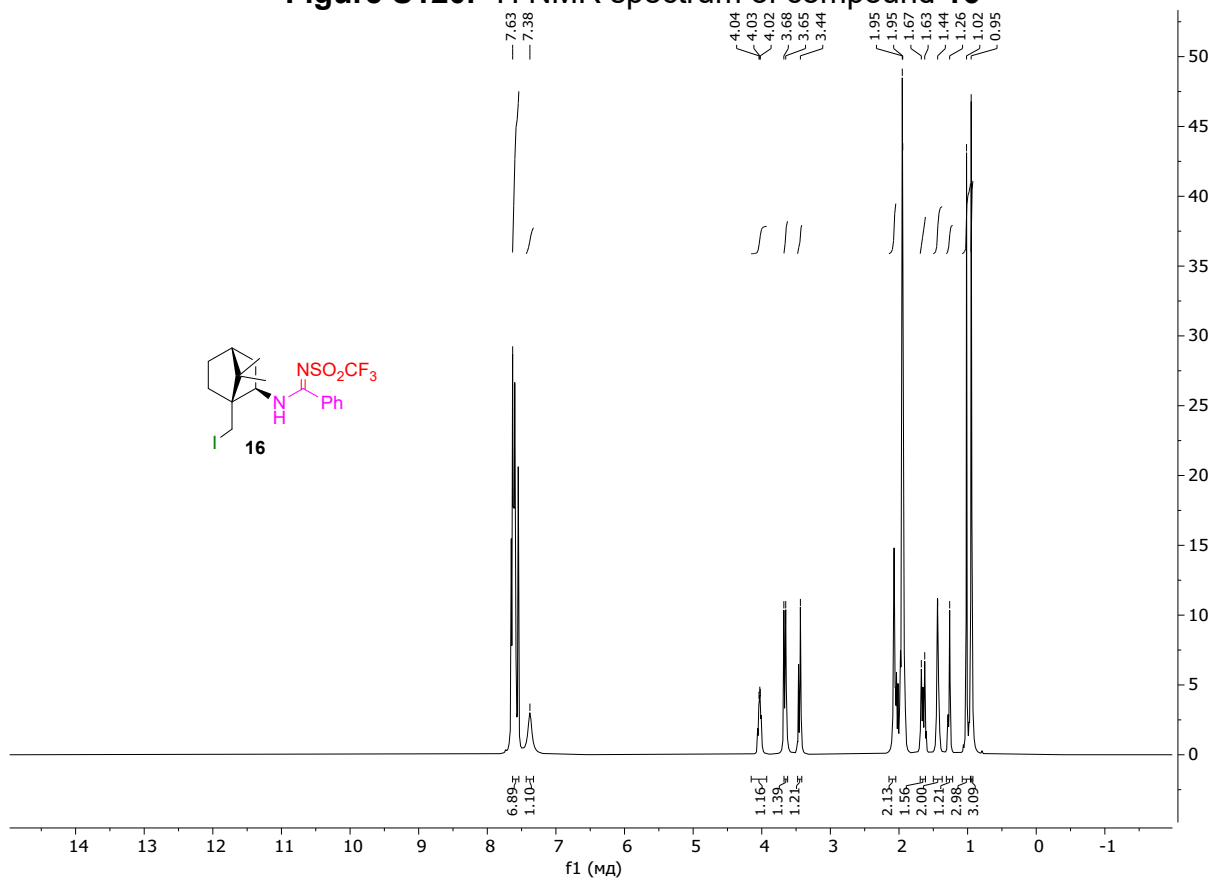

Figure S121.  $^{13}\text{C}$  NMR spectrum of compound **16**

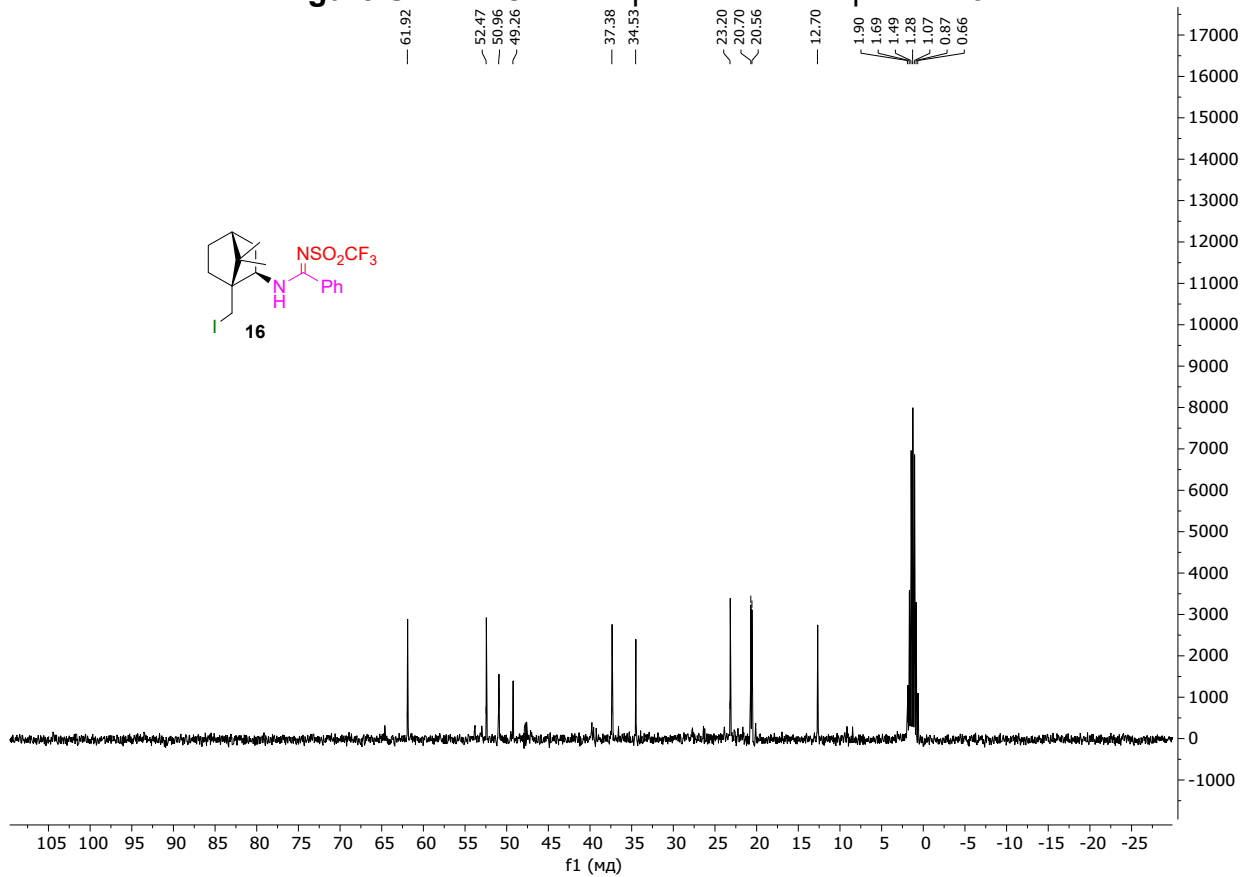

Figure S122.  $^{19}\text{F}$  NMR spectrum of compound **11**

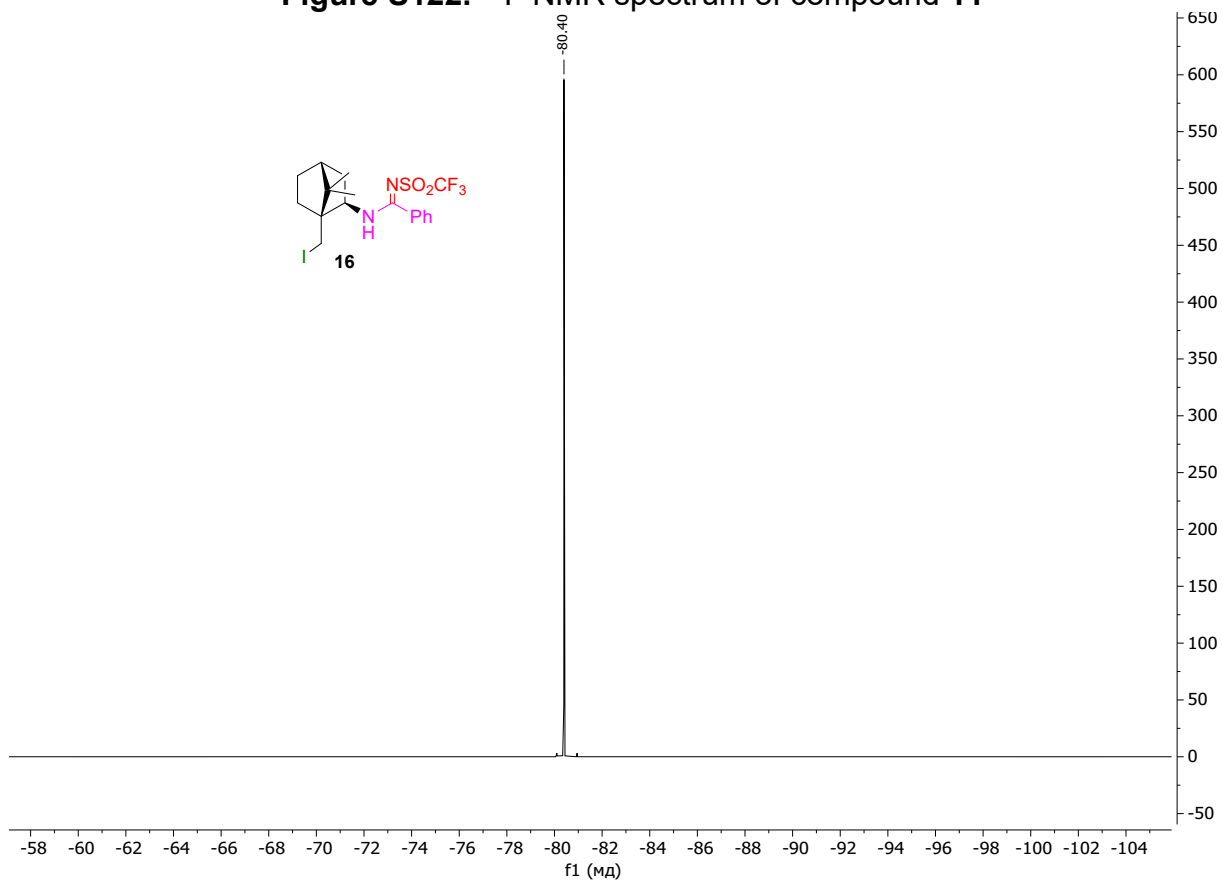

Figure S123.  $^1\text{H}$  NMR spectrum of compound **13**

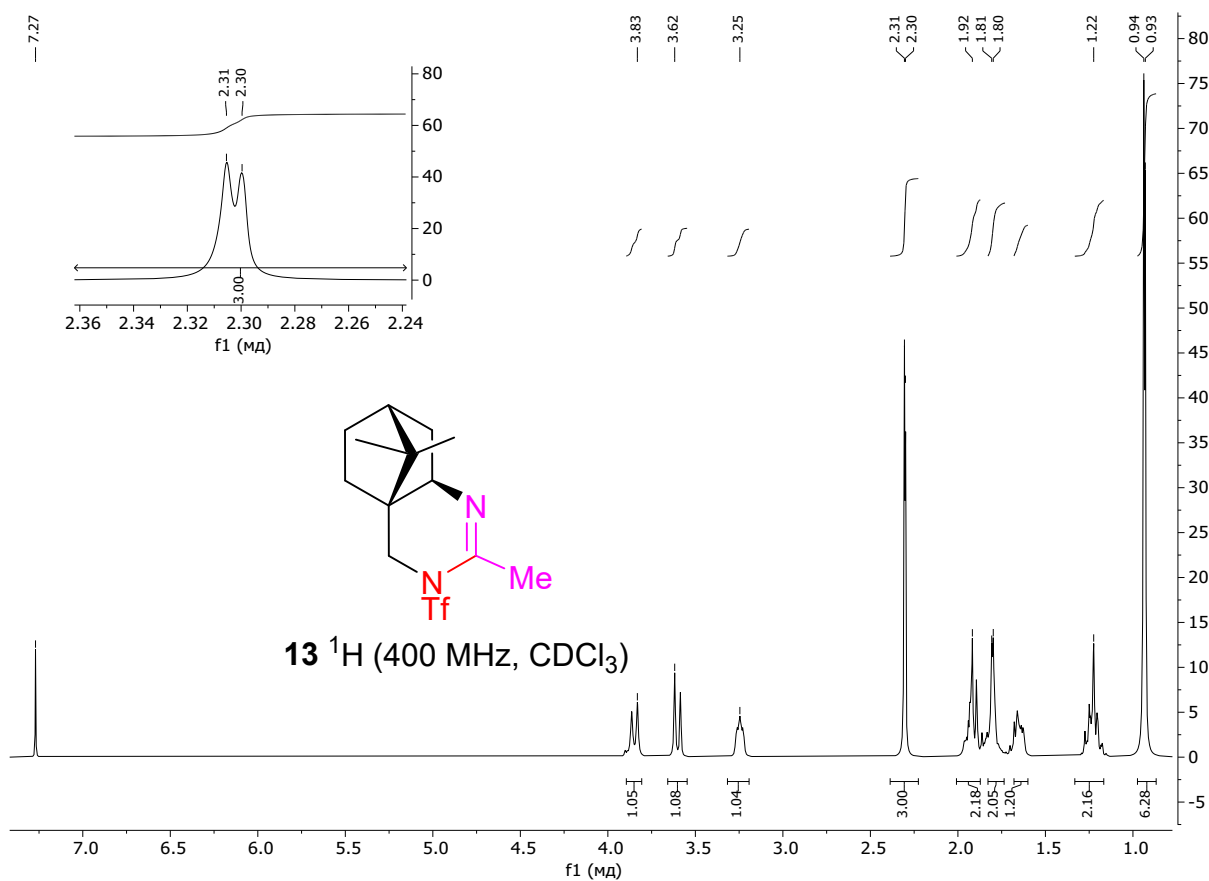

Figure S124.  $^{13}\text{C}$  NMR spectrum of compound **13**

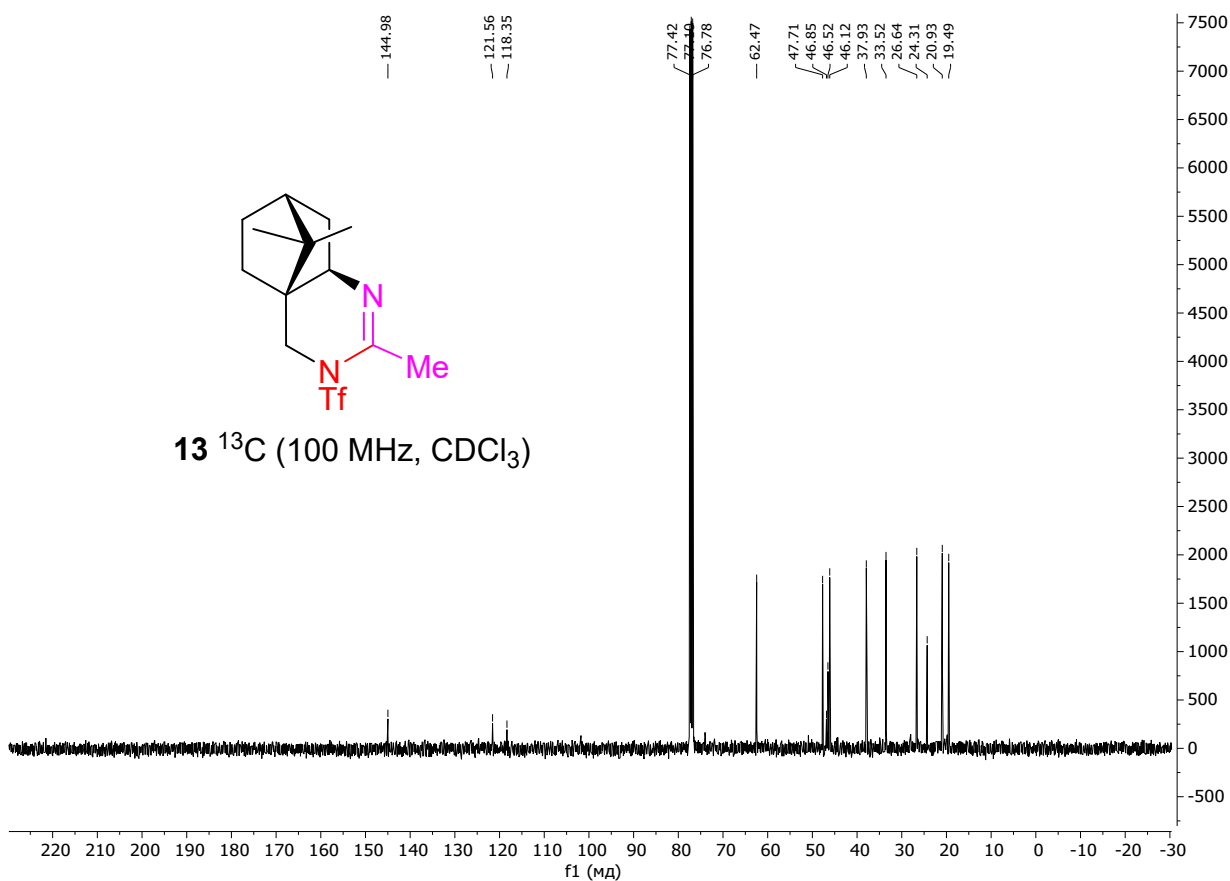

Figure S125.  $^{19}\text{F}$  NMR spectrum of compound **13**

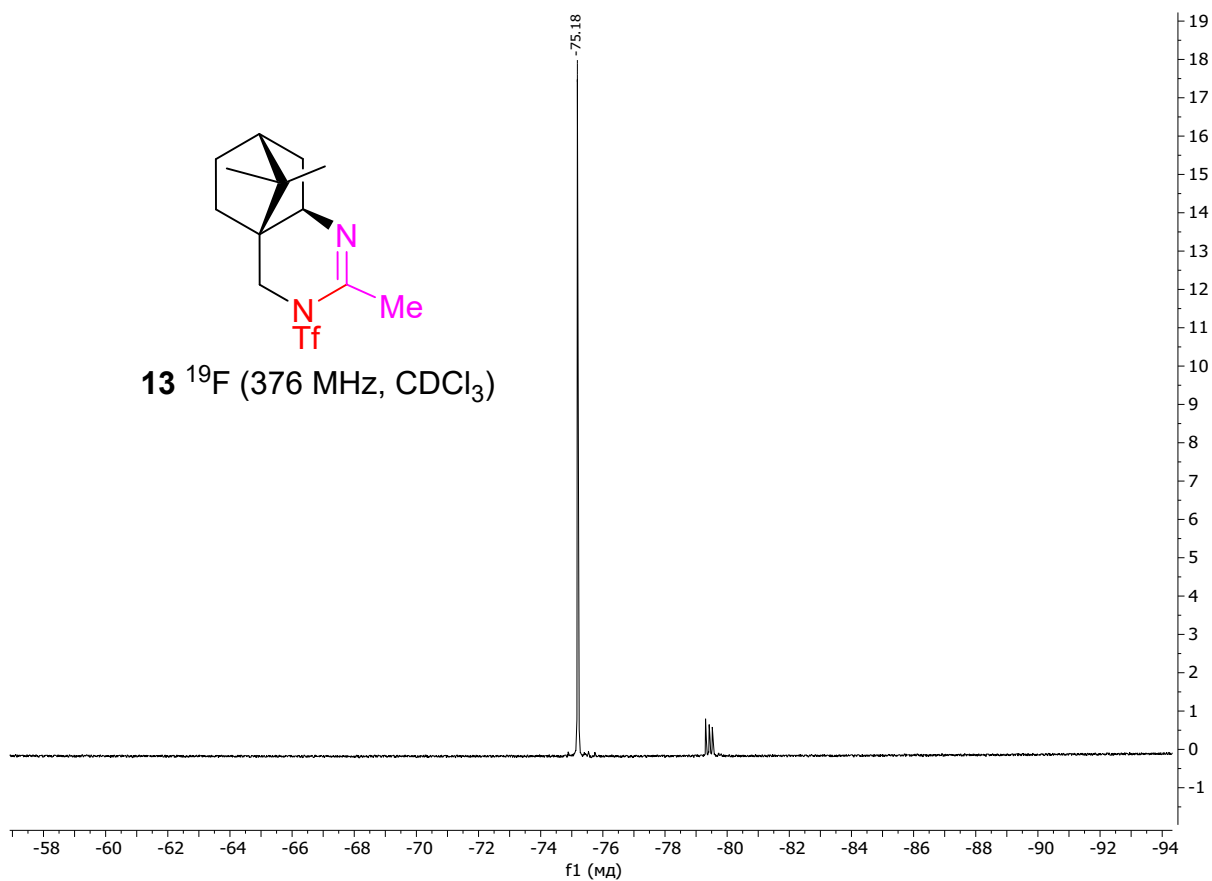



## 2D-NMR spectra of compounds

Figure S126. 2D COSY spectrum of compound 12

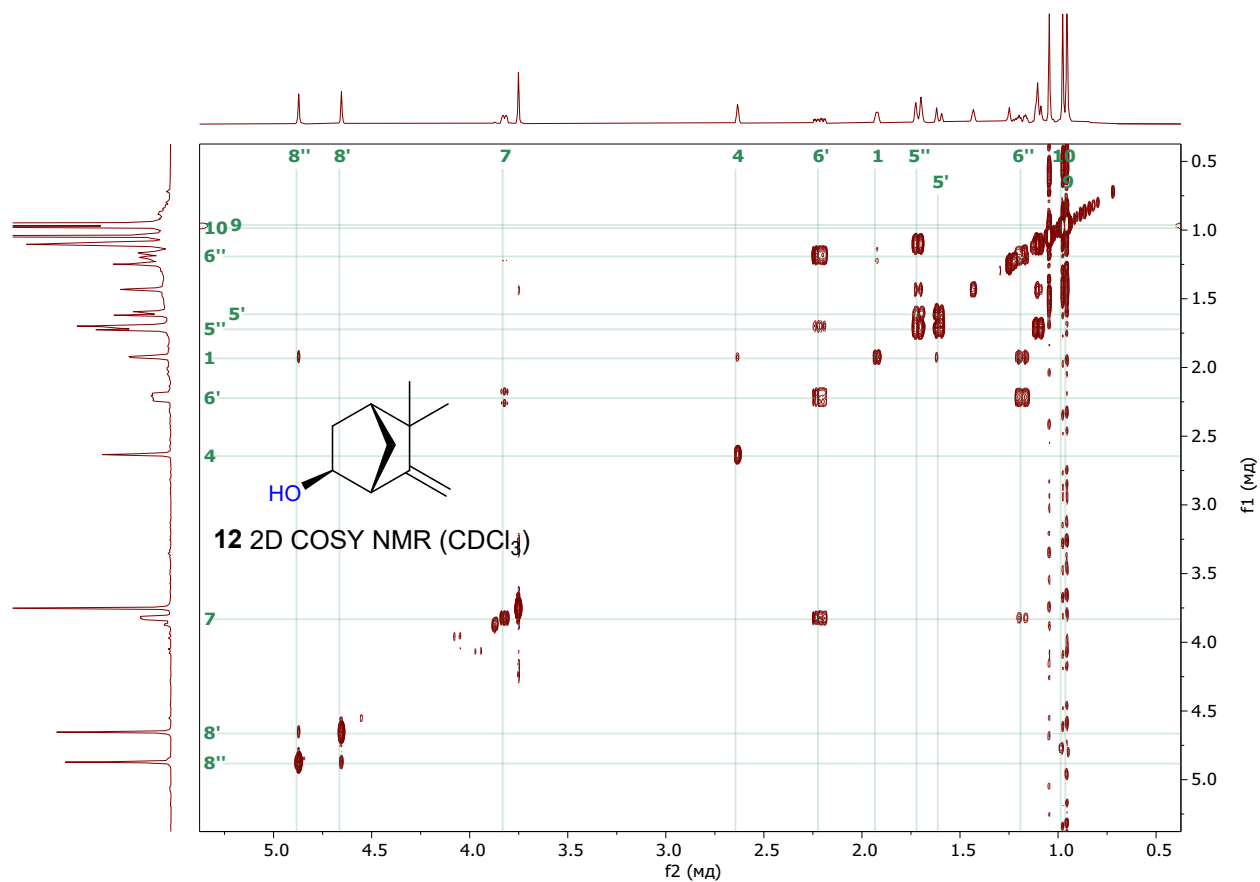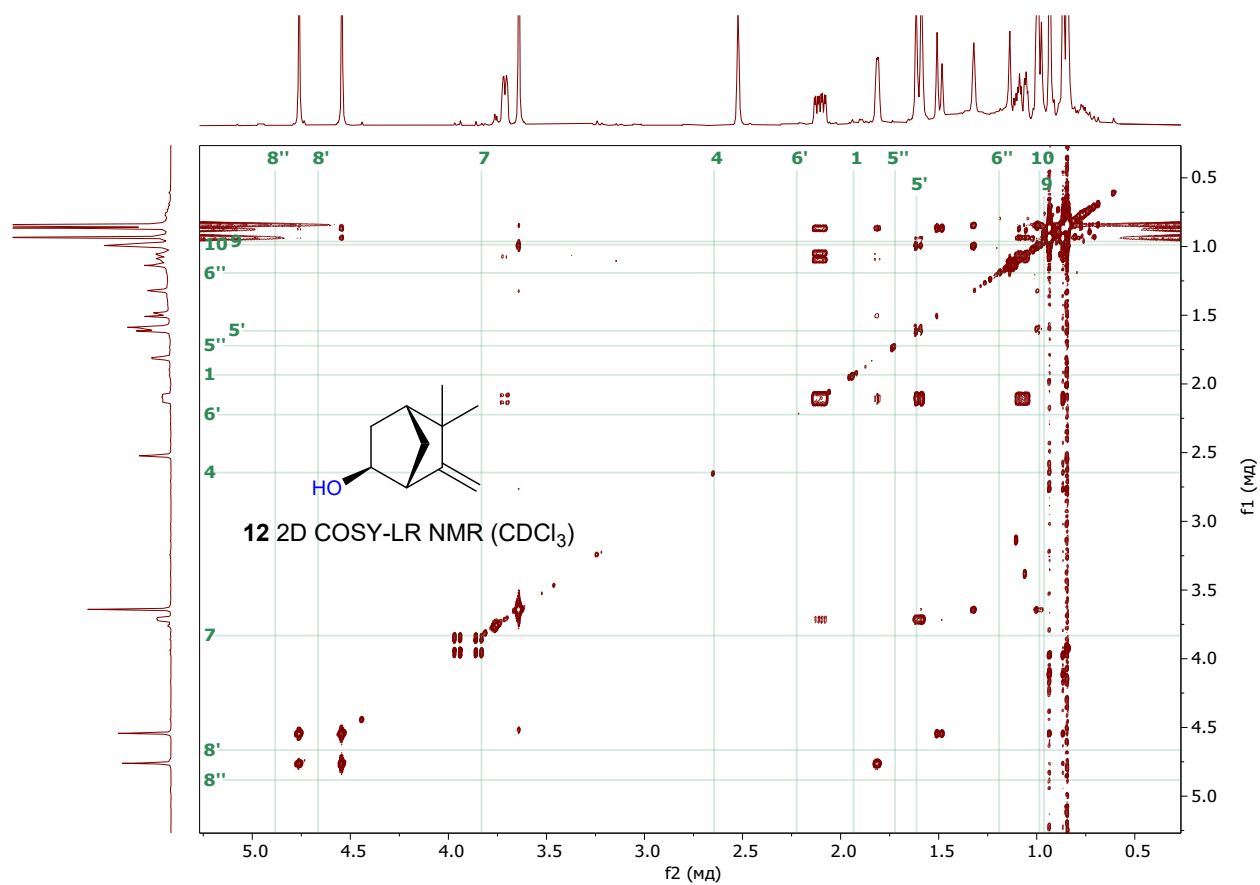

Figure S127. 2D NOESY spectrum of compound 12

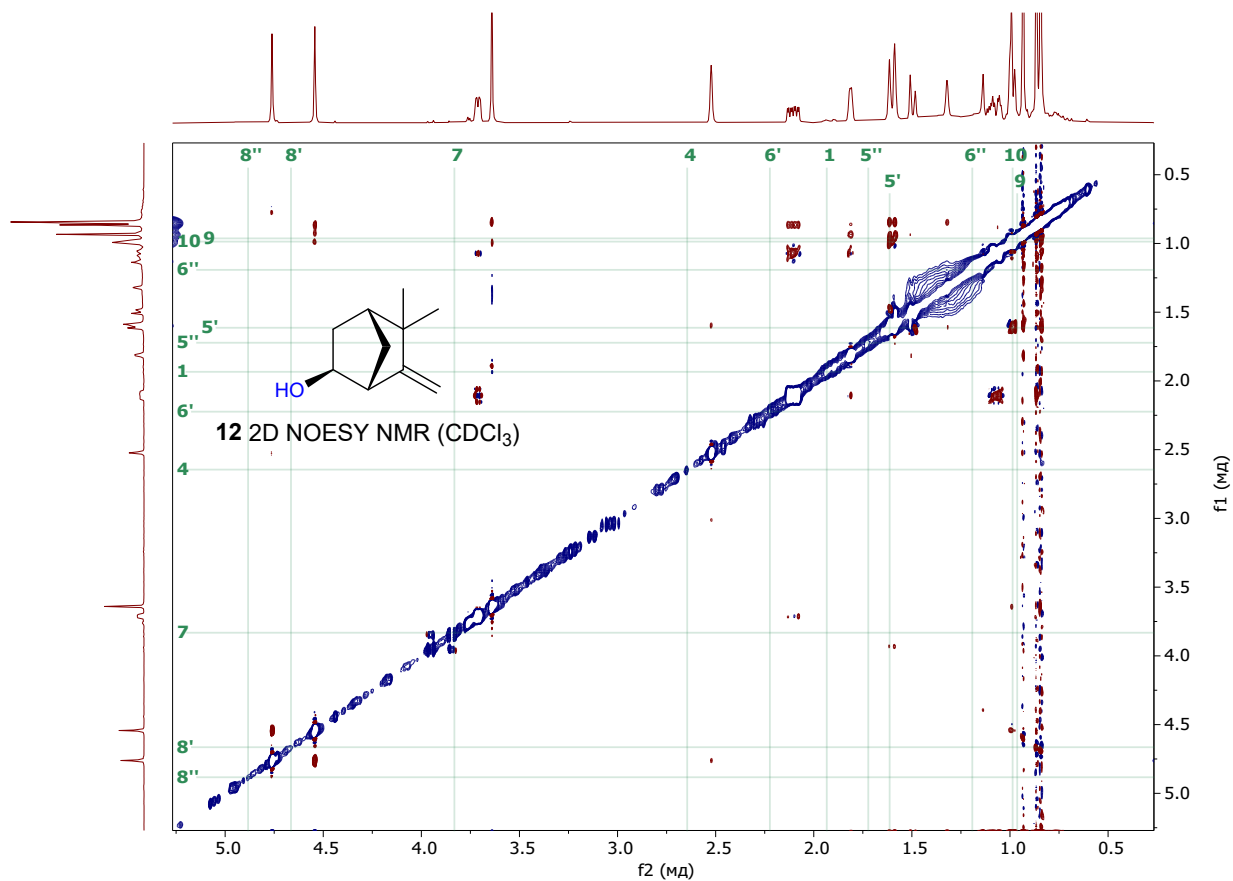

Figure S128. 2D <sup>1</sup>H-<sup>13</sup>C HSQC spectrum of compound 12

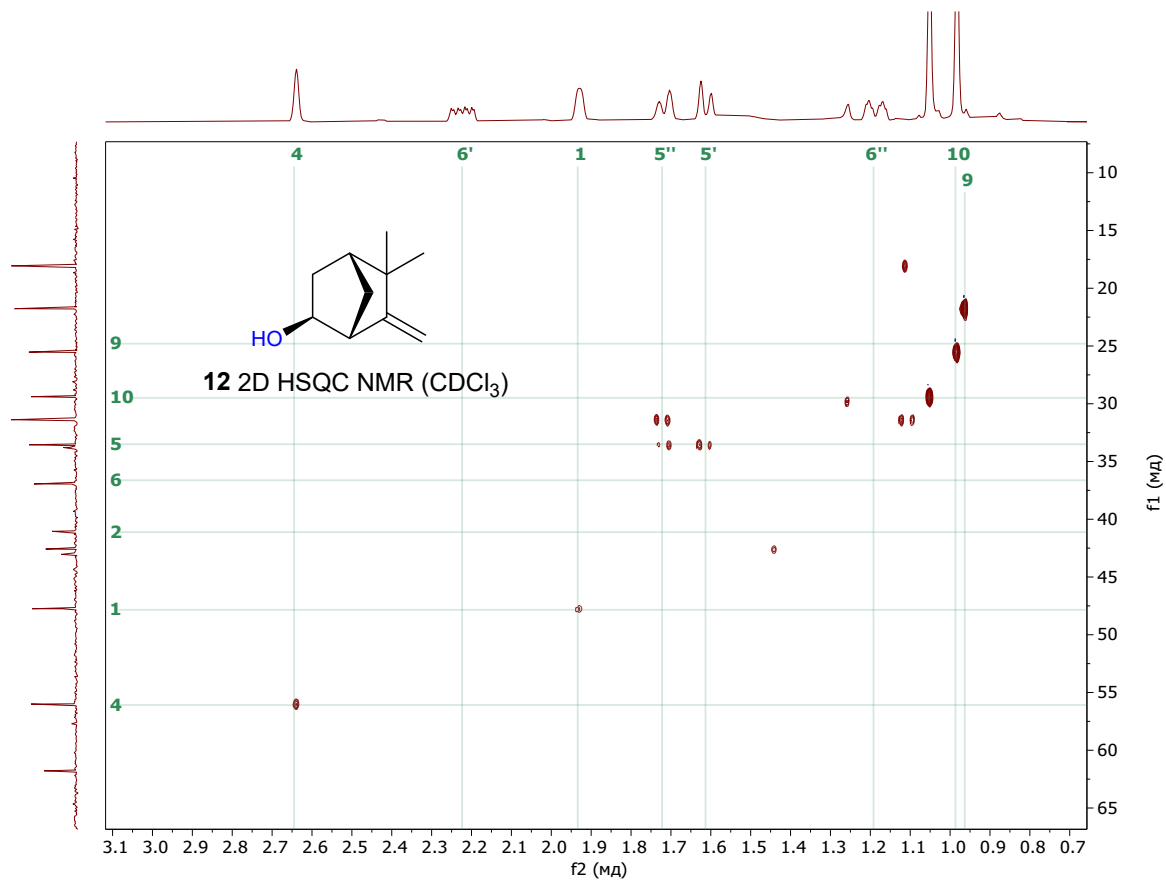

Figure S129. 2D  $^1\text{H}$ - $^{13}\text{C}$  HMBC spectrum of compound **12**

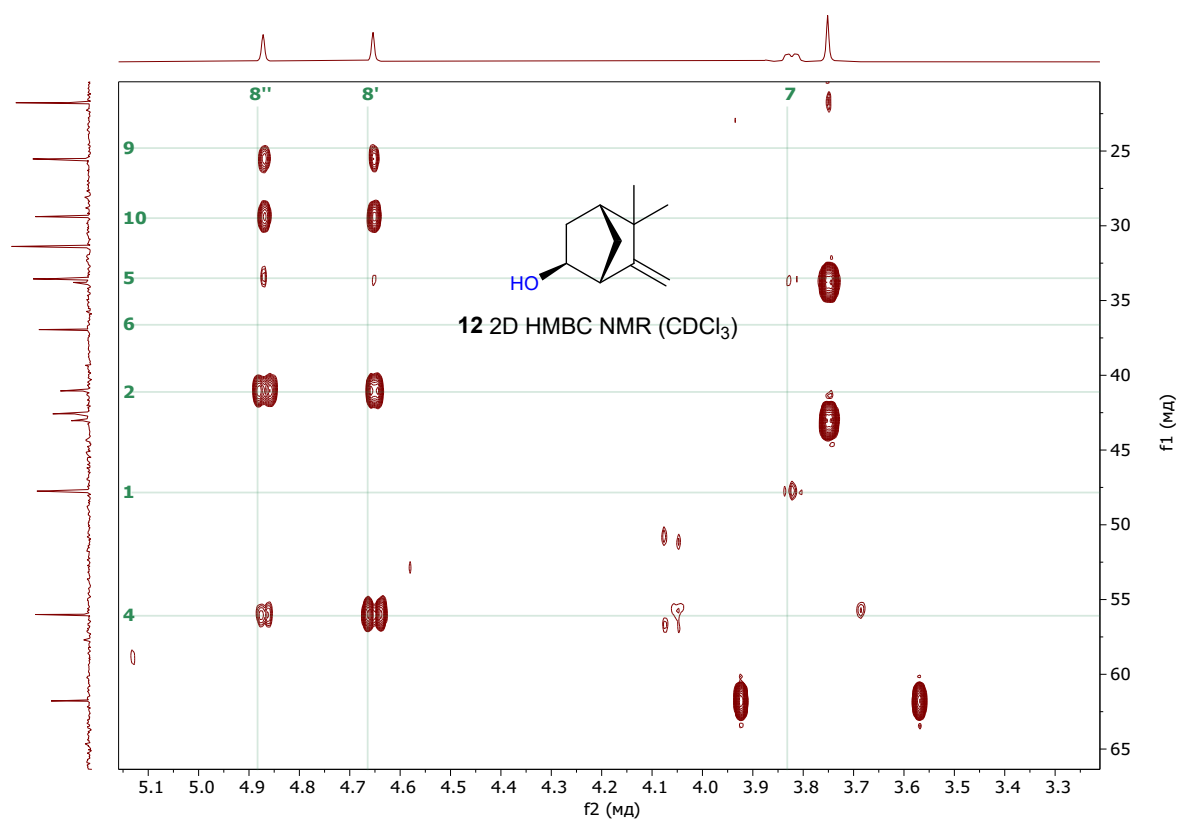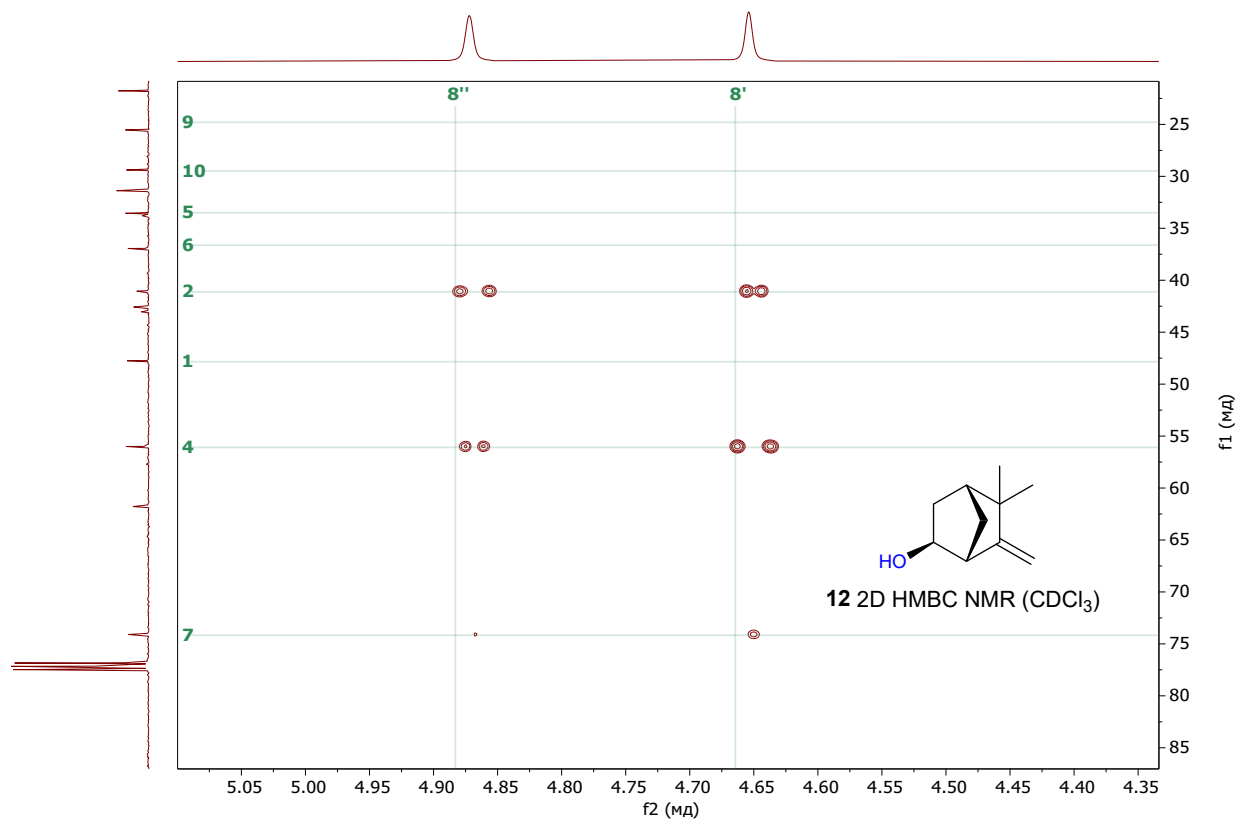

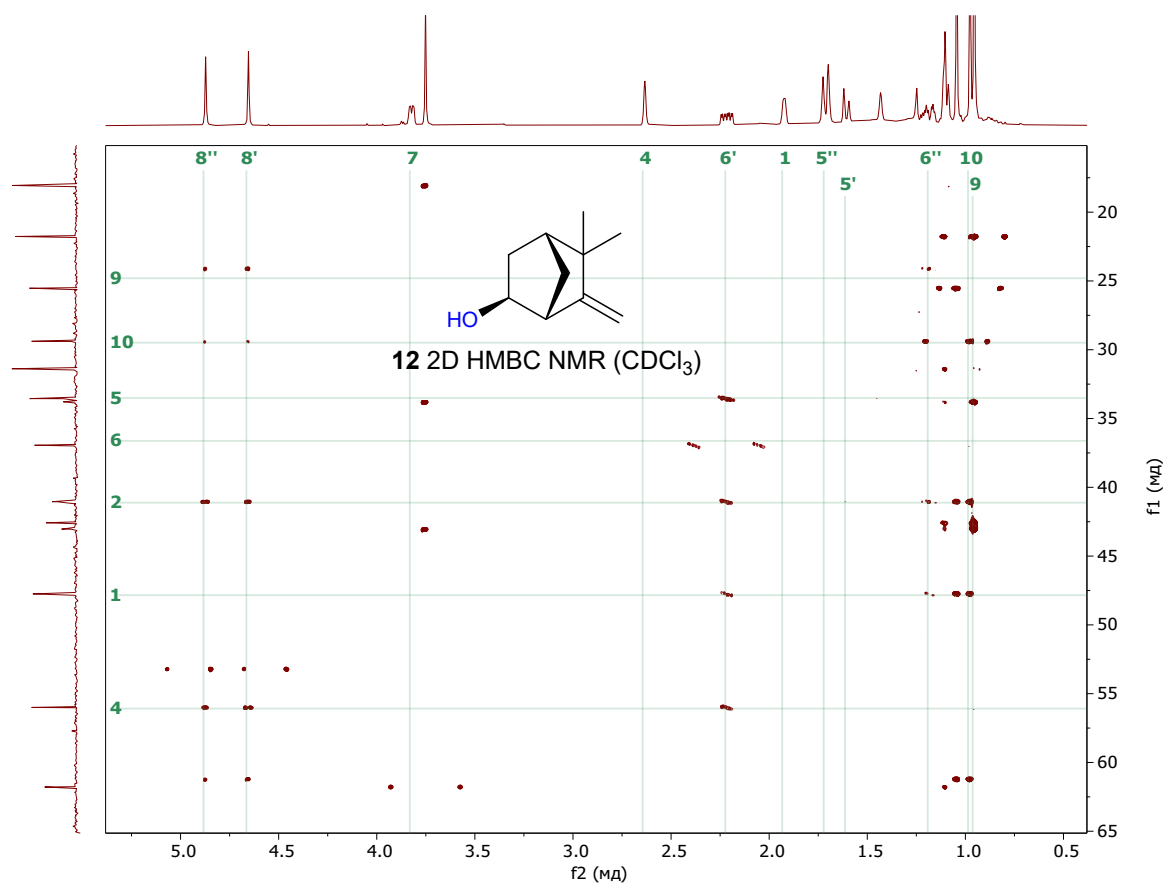

HRMS (ESI) data

**Figure S130.** HRMS (ESI) of compound **3a**

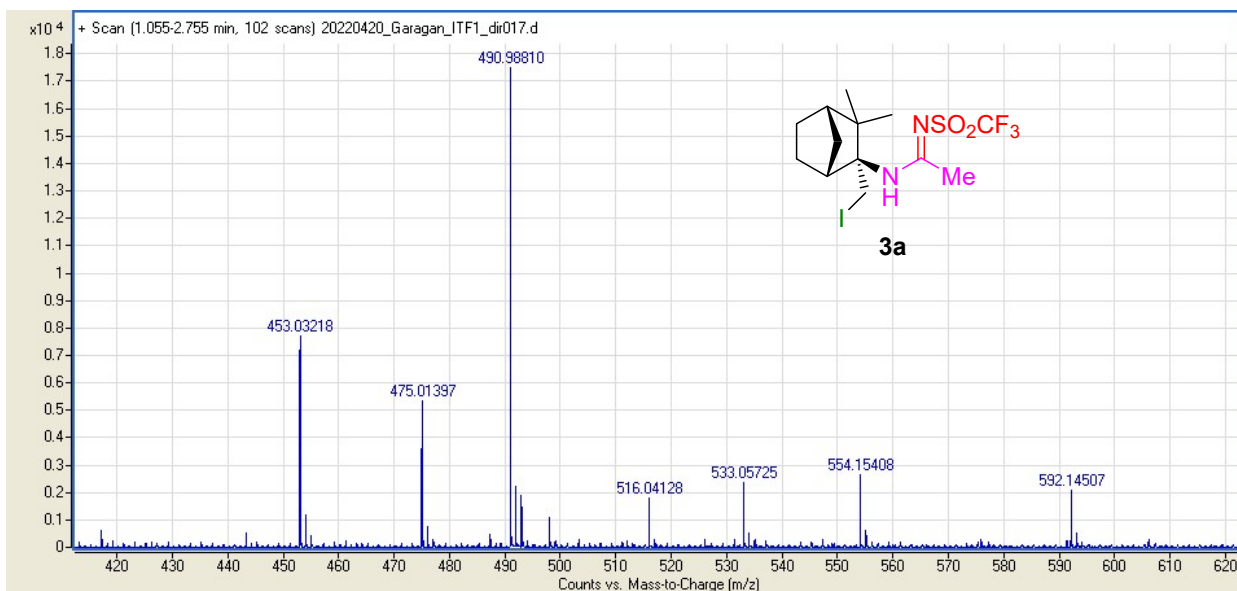

**Figure S131. HRMS (ESI) of compound 3d**

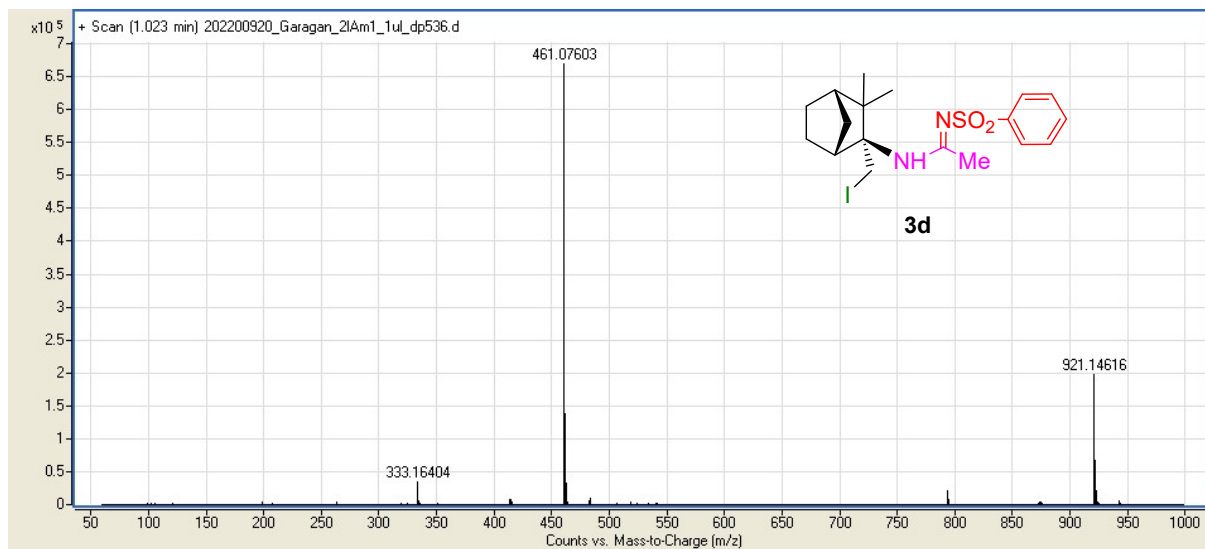

**Figure S132. HRMS (ESI) of compound 4**

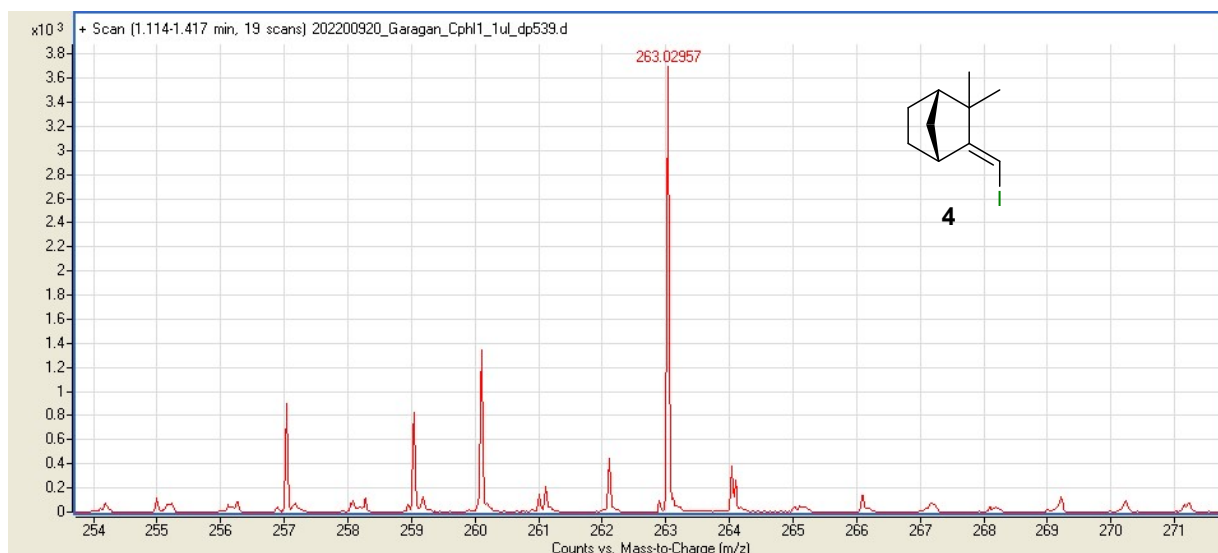

**Figure S133. HRMS (ESI) of compound 6**

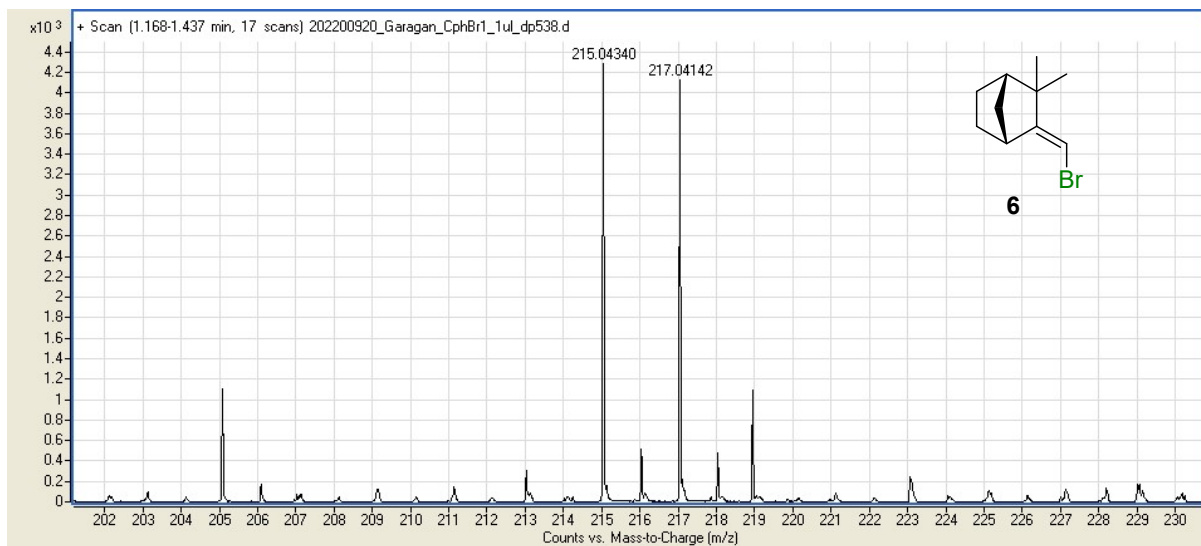

**Figure S134.** HRMS (ESI) of compound **7a**

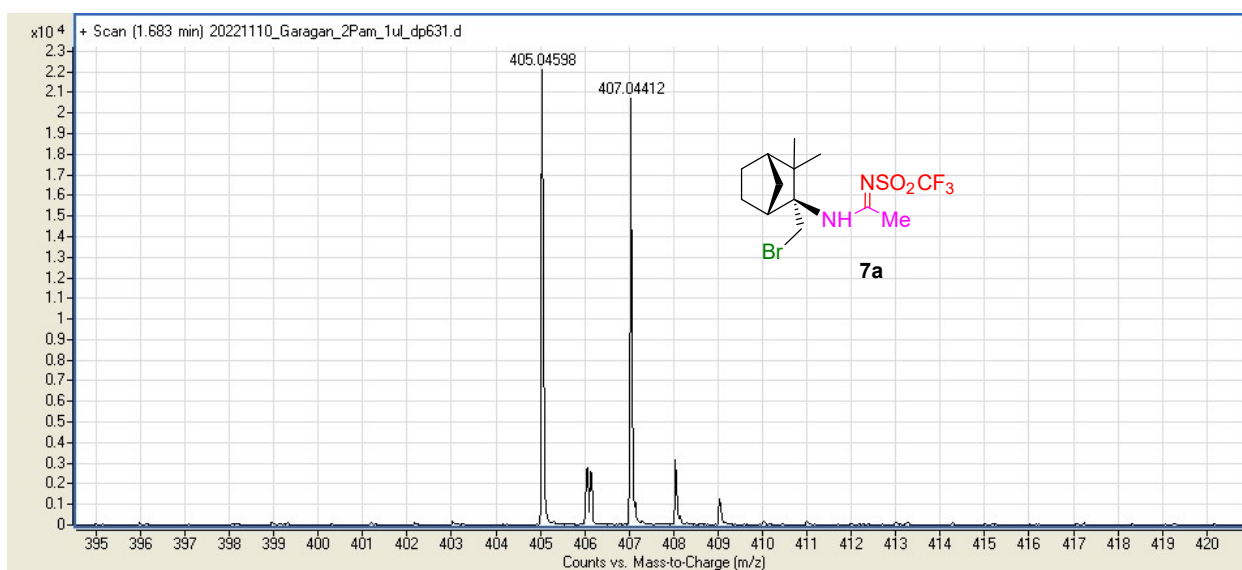

**Figure S135.** HRMS (ESI) of compound **7b**

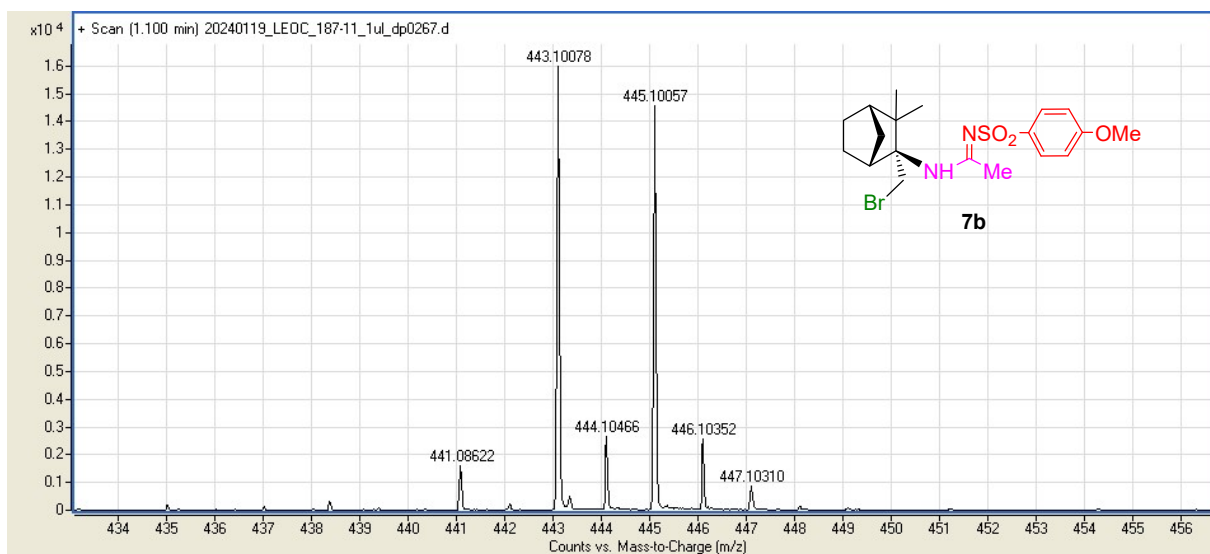

**Figure S136. HRMS (ESI) of compound 7f**

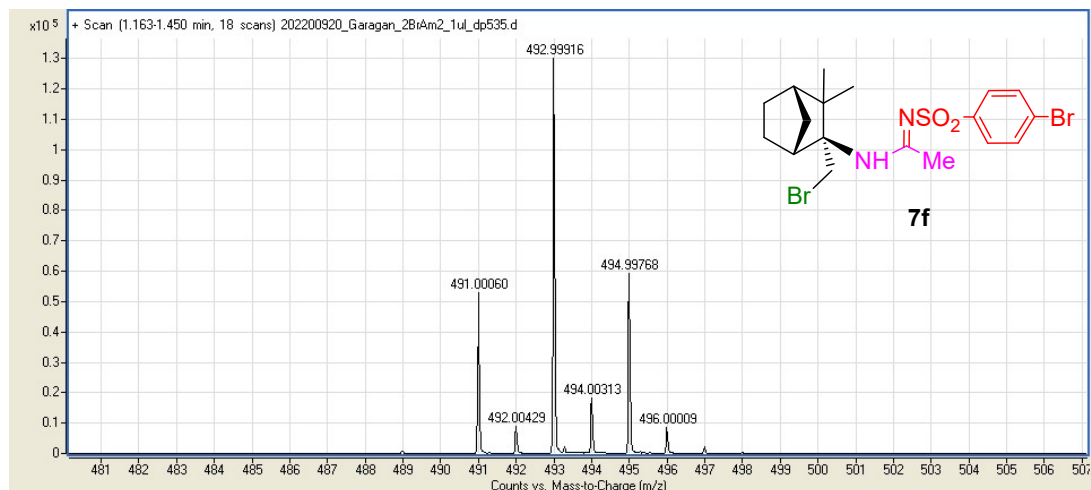

**Figure S137. HRMS (ESI) of compound 7g**

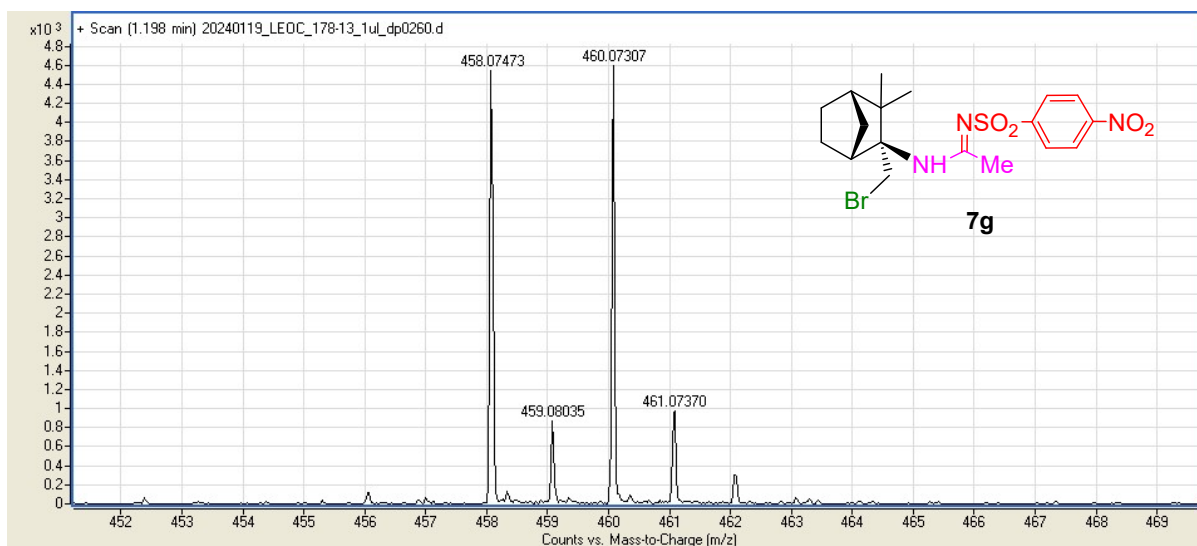

**Figure S138. HRMS (ESI) of compound 7h**

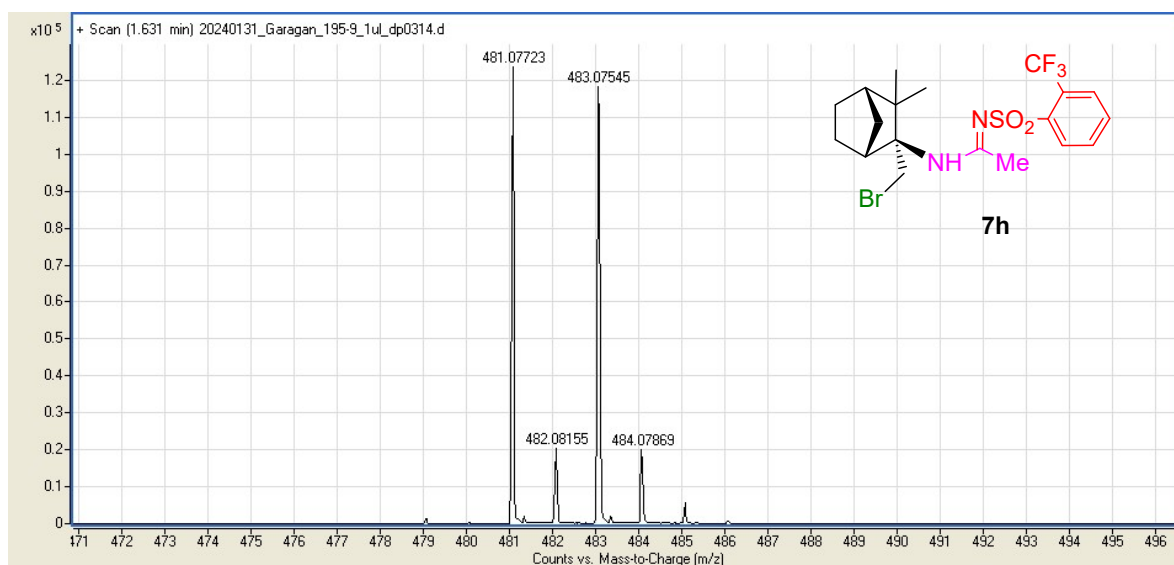

**Figure S139. HRMS (ESI) of compound 7k**

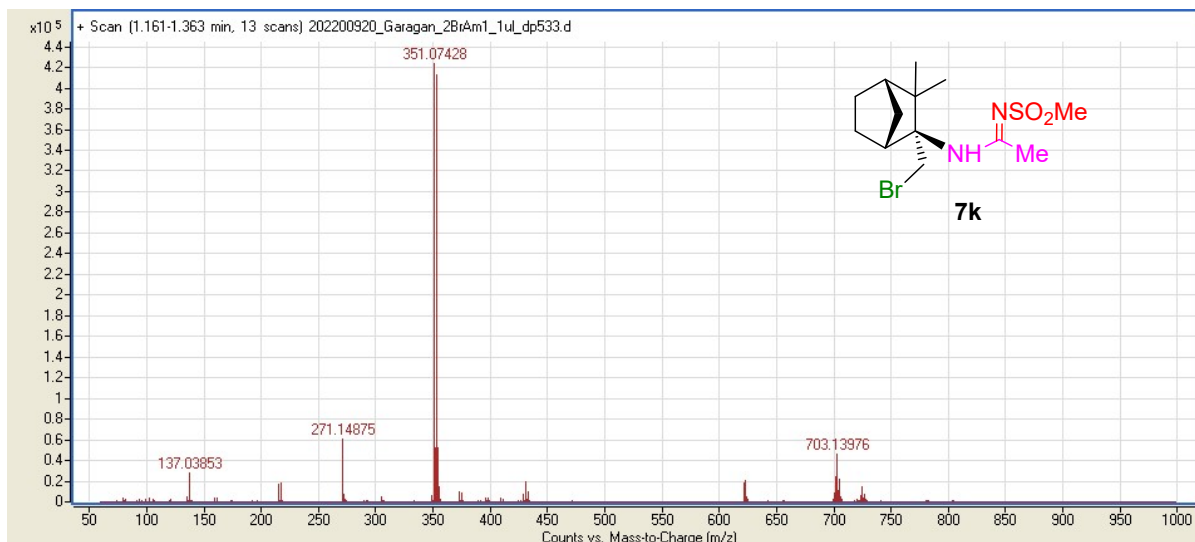

**Figure S140. HRMS (ESI) of compound 8b**

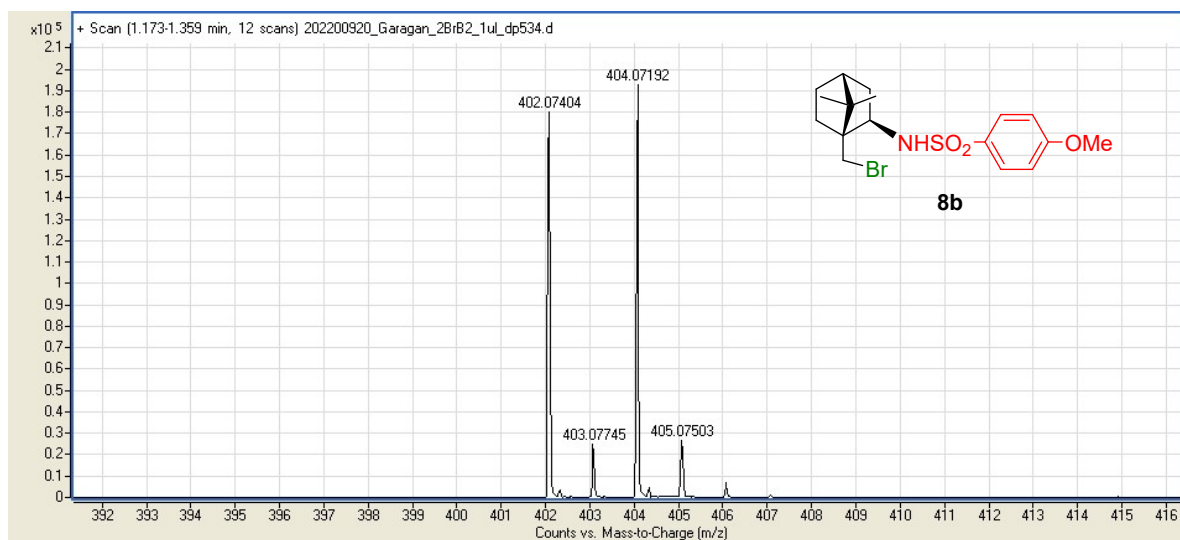

**Figure S141. HRMS (ESI) of compound 8h**

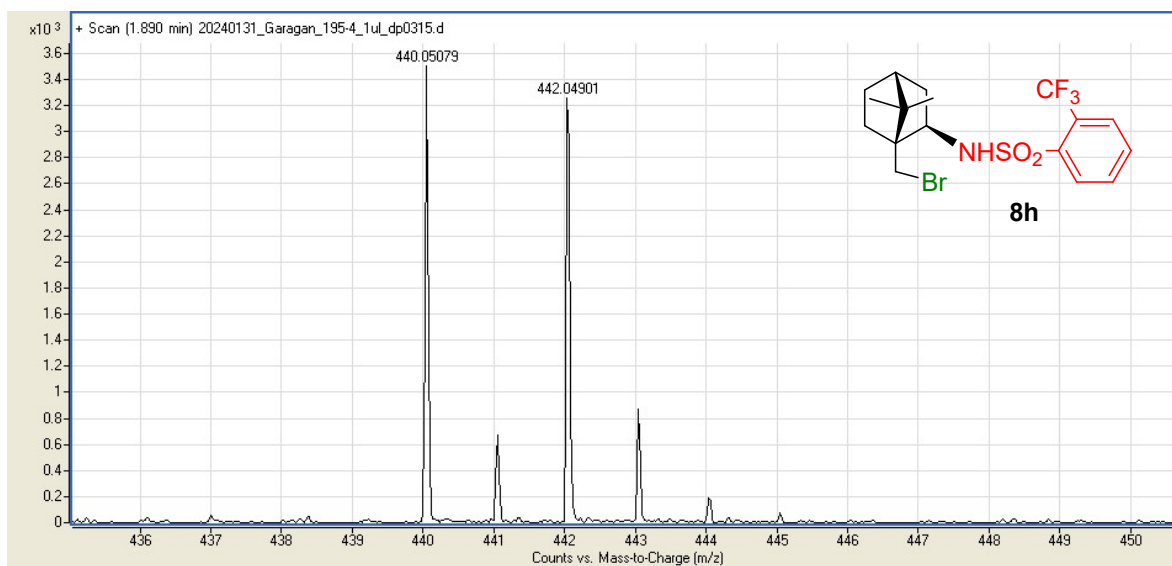



**Figure S142. HRMS (ESI) of compound 8k**

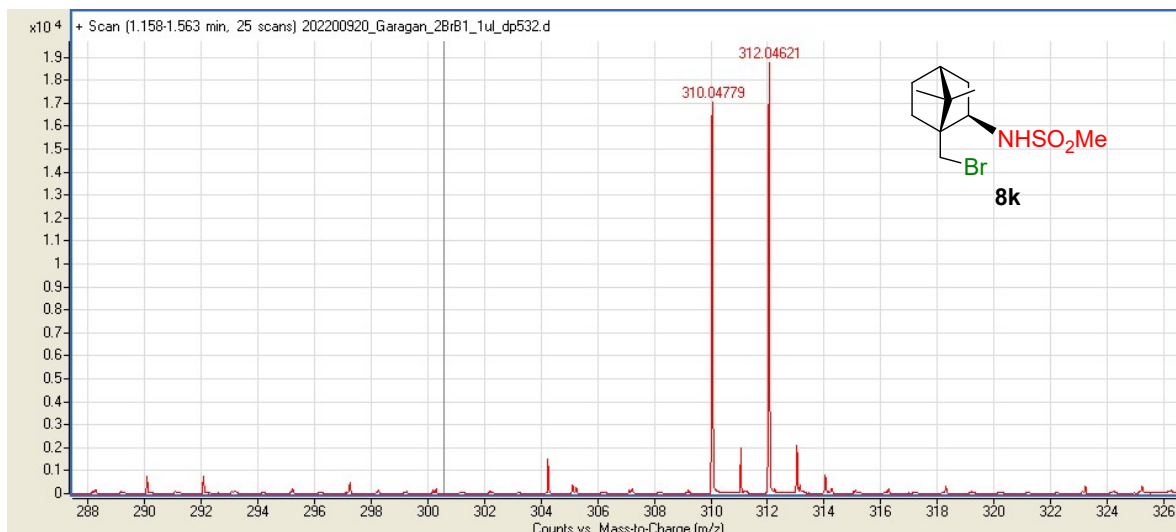

**Figure S143. HRMS (ESI) of compound 9**

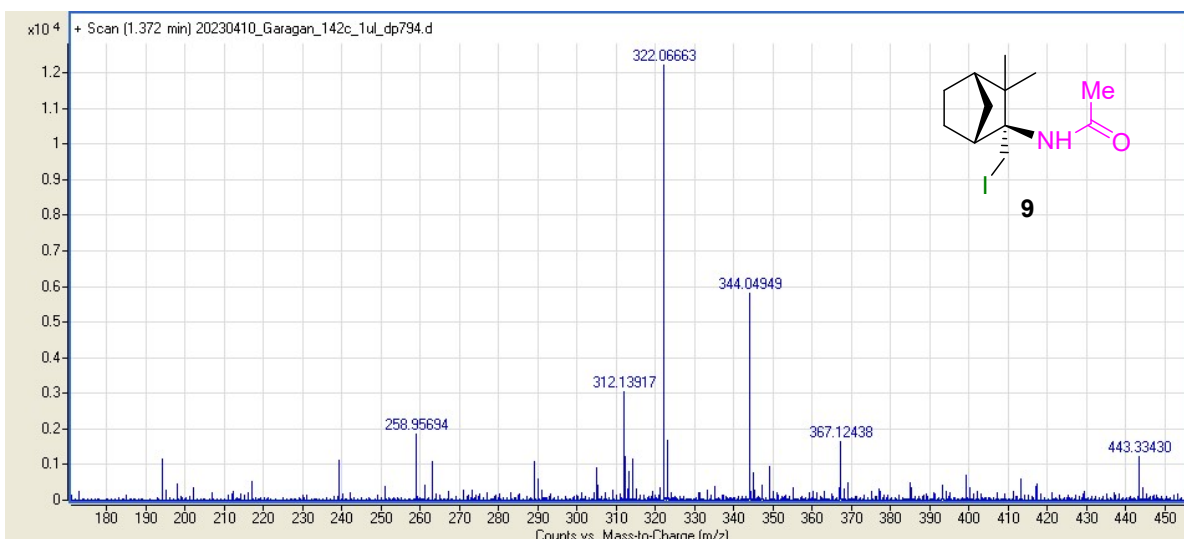

**Figure S144. HRMS (ESI) of compound 10**

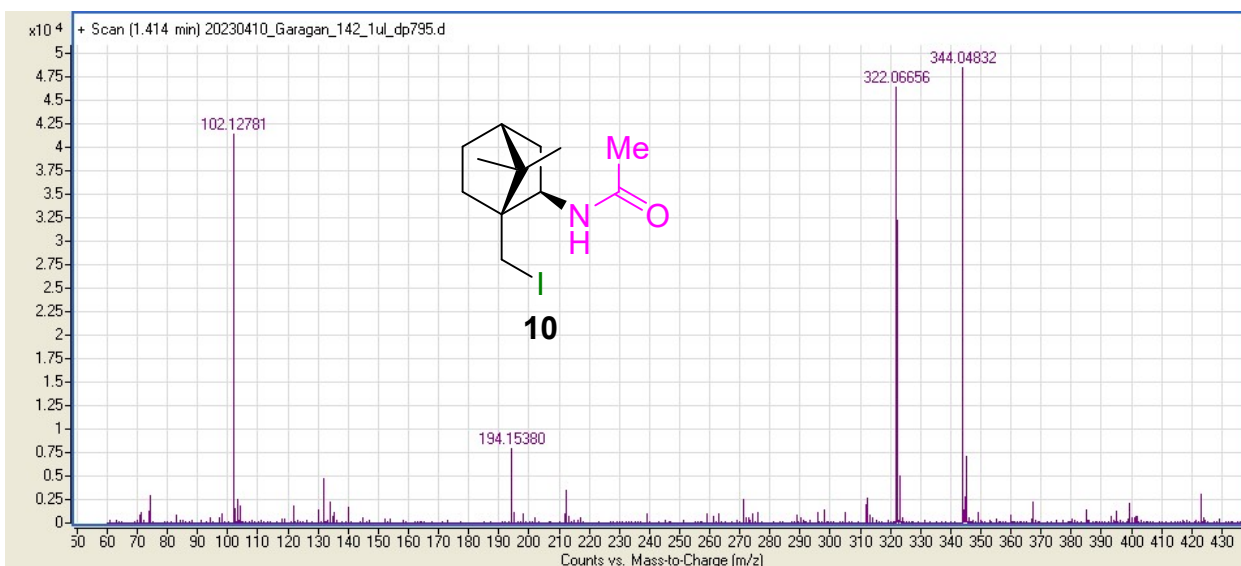

**Figure S145.** HRMS (ESI) of compound **17**

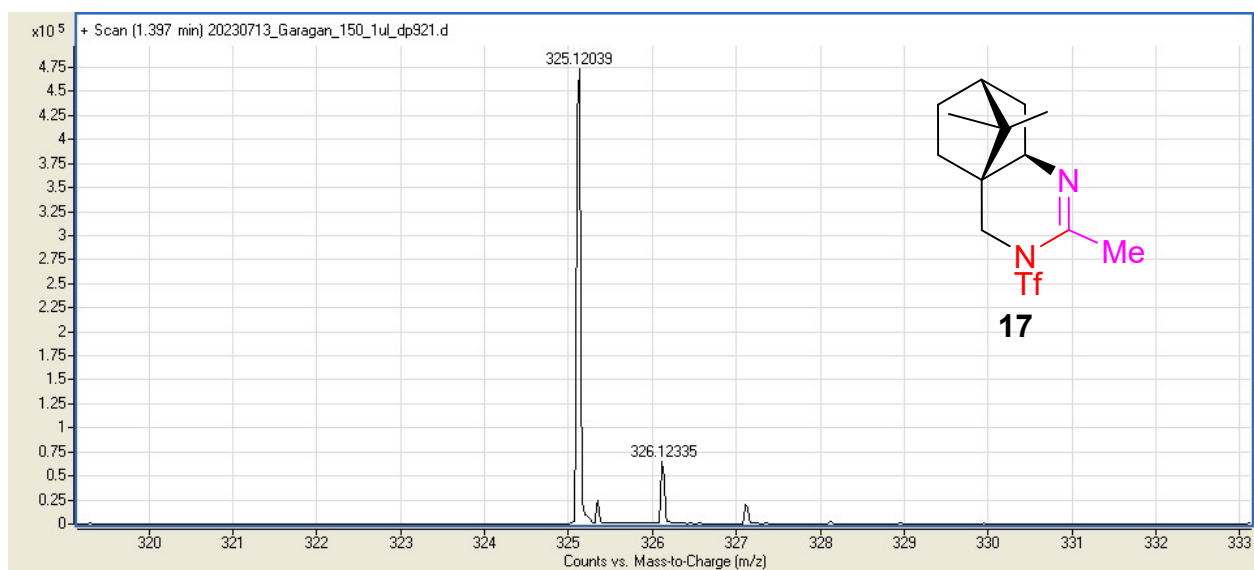

Supplement: d4nj02582b1.pdf [file d4nj02582b1.pdf]
